# Supplementary material for: Kinetic Analysis of Low-Rank Coal Pyrolysis by Model-Free and Model-Fitting Methods
Source: Hindawi journal article supplement (doi:10.1155/2019/9075862), 2019-11-11
Supplement: f1 [file 9075862.f1.xlsx]

## Sheet: SJC
SJC
Temperature	TG	TG	TG	TG	T	DTG	DTG	DTG	DTG	Temperature	DSC	DSC	DSC	DSC
°C	%	%	%	%	°C	%/min	%/min	%/min	%/min	°C	mW	mW	mW	mW
	5°C/minTG	10°C/minTG	15°C/minTG	20°C/minTG		5°C/minDTG	10°C/minDTG	15°C/minDTG	20°C/minDTG		5°C/min	10°C/min	15°C/min	20°C/min
50	99.9617	99.9616	99.9569	99.961	34.581	-0.02737	-0.4529	-0.0618	-0.51743	31.222	-1.36695	-1.24689	-1.13821	-1.24231
51.7	99.9698	99.9488	99.9145	99.9334	34.681	-0.02739	-0.1231	-0.0618	-0.51589	31.322	-1.40031	-1.24689	-1.13821	-1.38825
53.4	99.9766	99.9347	99.8758	99.9058	34.781	-0.0274	-0.16388	-0.0618	-0.51367	31.422	-1.4479	-1.24689	-1.13821	-1.4595
55.1	99.981	99.9192	99.8401	99.8788	34.881	-0.02742	-0.15988	-0.0618	-0.51197	31.522	-1.44973	-1.24689	-1.13821	-1.51881
56.8	99.9815	99.9016	99.8065	99.8506	34.981	-0.02743	-0.15096	-0.0618	-0.51028	31.622	-1.47455	-1.24689	-1.13821	-1.56012
58.5	99.9776	99.8823	99.7744	99.8221	35.081	-0.02743	-0.13992	-0.0618	-0.50875	31.722	-1.49528	-1.24689	-1.13821	-1.59524
60.2	99.9686	99.8615	99.7422	99.7913	35.181	-0.02744	-0.1379	-0.0618	-0.50693	31.822	-1.51231	-1.24689	-1.13821	-1.62747
61.9	99.9551	99.8392	99.7119	99.7582	35.281	-0.02744	-0.12769	-0.0618	-0.50543	31.922	-1.51398	-1.24689	-1.13821	-1.64267
63.6	99.9368	99.8153	99.6814	99.7232	35.381	-0.02745	-0.12278	-0.0618	-0.50414	32.022	-1.56688	-1.24689	-1.13821	-1.67412
65.3	99.9143	99.7893	99.651	99.6859	35.481	-0.02746	-0.11835	-0.0618	-0.50285	32.122	-1.5762	-1.24689	-1.13821	-1.69459
67	99.8884	99.7615	99.6209	99.6456	35.581	-0.02747	-0.11415	-0.0618	-0.50134	32.222	-1.58354	-1.24689	-1.13821	-1.71194
68.7	99.8589	99.7316	99.5916	99.6042	35.681	-0.02748	-0.10937	-0.0618	-0.49938	32.322	-1.5936	-1.24689	-1.13821	-1.73262
70.4	99.8269	99.6995	99.5625	99.561	35.781	-0.02749	-0.10506	-0.0618	-0.4977	32.422	-1.61076	-1.24689	-1.13821	-1.74781
72.1	99.7912	99.6656	99.5332	99.5173	35.881	-0.02751	-0.10325	-0.0618	-0.49629	32.522	-1.62668	-1.24689	-1.13821	-1.77282
73.8	99.7546	99.6292	99.5038	99.4723	35.981	-0.02754	-0.09914	-0.0618	-0.49532	32.622	-1.63937	-1.24689	-1.13821	-1.78629
75.5	99.7172	99.5904	99.4751	99.4257	36.081	-0.02757	-0.09703	-0.0618	-0.49348	32.722	-1.65901	-1.24689	-1.13821	-1.80643
77.2	99.6801	99.5492	99.4468	99.3781	36.181	-0.0276	-0.09442	-0.0618	-0.49251	32.822	-1.67028	-1.24689	-1.13821	-1.82658
78.9	99.6422	99.5053	99.4179	99.3291	36.281	-0.02764	-0.09283	-0.0618	-0.49157	32.922	-1.67597	-1.24689	-1.13821	-1.83894
80.6	99.6049	99.4594	99.3895	99.279	36.381	-0.0277	-0.09015	-0.0618	-0.49021	33.022	-1.69263	-1.24689	-1.13821	-1.85985
82.3	99.5663	99.4127	99.3603	99.2284	36.481	-0.02774	-0.08814	-0.5081	-0.48884	33.122	-1.70255	-1.24689	-1.13821	-1.86658
84	99.5339	99.365	99.331	99.1765	36.581	-0.02779	-0.08632	-0.53982	-0.48762	33.222	-1.71477	-1.24689	-1.13821	-1.87915
85.7	99.5054	99.3153	99.3019	99.1235	36.681	-0.02785	-0.08477	-0.58514	-0.48654	33.322	-1.72724	-1.24689	-1.13821	-1.87169
87.4	99.4832	99.2641	99.2709	99.0688	36.781	-0.02791	-0.08324	-0.61943	-0.48558	33.422	-1.74143	-1.24689	-1.13821	-2.01689
89.1	99.4647	99.2126	99.239	99.014	36.881	-0.02798	-0.08171	-0.63712	-0.48399	33.522	-1.74944	-1.24689	-1.13821	-1.80987
90.8	99.4491	99.1613	99.206	98.9597	36.981	-0.02807	-0.0802	-0.65856	-0.48322	33.622	-1.75819	-1.24689	-1.13821	-1.93046
92.5	99.4335	99.1105	99.1715	98.9059	37.081	-0.02819	-0.07845	-0.67944	-0.48217	33.722	-1.77045	-1.24689	-1.13821	-1.93235
94.2	99.4179	99.0613	99.1355	98.8526	37.181	-0.02831	-0.07678	-0.6923	-0.48129	33.822	-1.78001	-1.24689	-1.13821	-1.93781
95.9	99.4023	99.012	99.0992	98.7998	37.281	-0.02841	-0.07586	-0.69919	-0.48041	33.922	-1.79002	-1.24689	-1.13821	-1.94533
97.6	99.3872	98.9625	99.0609	98.7475	37.381	-0.02852	-0.07505	-0.70782	-0.47938	34.022	-1.79672	-1.24689	-1.13821	-1.95667
99.3	99.3723	98.9149	99.0214	98.6939	37.481	-0.02864	-0.07393	-0.72105	-0.47865	34.122	-1.80271	-1.24689	-1.13821	-1.96183
101	99.3588	98.8688	98.9817	98.6408	37.581	-0.02869	-0.07272	-0.72843	-0.47778	34.222	-1.82093	-1.24689	-1.13821	-1.97084
102.7	99.347	98.8234	98.9407	98.5891	37.681	-0.02878	-0.07174	-0.73594	-0.477	34.322	-1.82554	-1.24689	-1.13821	-1.97491
104.4	99.3374	98.7786	98.8993	98.5379	37.781	-0.02902	-0.07076	-0.74232	-0.47647	34.422	-1.83355	-1.24689	-1.13821	-1.98006
106.1	99.3292	98.7357	98.8579	98.4864	37.881	-0.02918	-0.06977	-0.74664	-0.47588	34.522	-1.84663	-1.24689	-1.13821	-1.9875
107.8	99.3233	98.6936	98.817	98.4364	37.981	-0.02929	-0.06909	-0.75243	-0.47508	34.622	-1.85467	-1.24689	-1.13821	-1.9925
109.5	99.3195	98.6527	98.776	98.3878	38.081	-0.02945	-0.06853	-0.75632	-0.47461	34.722	-1.86334	-1.85168	-1.13821	-1.9994
111.2	99.3174	98.6131	98.7349	98.3401	38.181	-0.0297	-0.06796	-0.75864	-0.47418	34.822	-1.87226	-1.68393	-1.13821	-2.00544
112.9	99.315	98.5756	98.6955	98.2936	38.281	-0.02987	-0.06737	-0.76089	-0.47366	34.922	-1.88601	-1.76507	-1.13821	-2.01111
114.6	99.3126	98.5392	98.6572	98.2501	38.381	-0.03009	-0.06674	-0.76218	-0.47315	35.022	-1.89162	-1.83801	-1.13821	-2.01556
116.3	99.3101	98.5043	98.6205	98.2088	38.481	-0.03028	-0.06612	-0.76428	-0.47265	35.122	-1.89603	-1.94826	-1.13821	-2.02035
118	99.307	98.4714	98.5848	98.1695	38.581	-0.03042	-0.06567	-0.76506	-0.47225	35.222	-1.90519	-2.03984	-1.13821	-2.02522
119.7	99.3036	98.4406	98.5509	98.132	38.681	-0.03077	-0.0653	-0.76573	-0.47189	35.322	-1.9135	-2.06081	-1.13821	-2.02875
121.4	99.3001	98.4113	98.5189	98.0968	38.781	-0.03101	-0.06484	-0.76582	-0.4715	35.422	-1.92023	-2.12174	-1.13821	-2.03215
123.1	99.2958	98.3835	98.4889	98.0635	38.881	-0.03111	-0.06442	-0.76559	-0.47117	35.522	-1.93027	-2.173	-1.13821	-2.03532
124.8	99.2902	98.3569	98.4606	98.0318	38.981	-0.0313	-0.06413	-0.76499	-0.4709	35.622	-1.93805	-2.22641	-1.13821	-2.03982
126.5	99.2819	98.3315	98.4343	98.001	39.081	-0.03154	-0.06386	-0.76423	-0.47061	35.722	-1.94398	-2.2909	-1.13821	-2.04379
128.2	99.2709	98.3066	98.41	97.9711	39.181	-0.03177	-0.06357	-0.76338	-0.47025	35.822	-1.95172	-2.33784	-1.13821	-2.04783
129.9	99.2568	98.2819	98.387	97.9416	39.281	-0.03201	-0.06331	-0.76208	-0.47	35.922	-1.96186	-2.37338	-1.13821	-2.04999
131.6	99.2407	98.2569	98.3657	97.9124	39.381	-0.03226	-0.0631	-0.75986	-0.46983	36.022	-1.96966	-2.4289	-1.13821	-2.05297
133.3	99.2236	98.2325	98.3461	97.8835	39.481	-0.03253	-0.06295	-0.75765	-0.46963	36.122	-1.97665	-2.46804	-1.13821	-2.05617
135	99.2091	98.2077	98.3282	97.8545	39.581	-0.03281	-0.06283	-0.75563	-0.46944	36.222	-1.9835	-2.50228	-1.13821	-2.05781
136.7	99.1962	98.1824	98.3114	97.8253	39.681	-0.03311	-0.06273	-0.75382	-0.46929	36.322	-1.9903	-2.53823	-1.13821	-2.05999
138.4	99.1865	98.1571	98.2963	97.7962	39.781	-0.03338	-0.06265	-0.75347	-0.46916	36.422	-1.99875	-2.5847	-1.39452	-2.06276
140.1	99.1798	98.1325	98.2816	97.7668	39.881	-0.03358	-0.06259	-0.75161	-0.46904	36.522	-2.00406	-2.62114	-1.50541	-2.06504
141.8	99.1754	98.1083	98.2682	97.7383	39.981	-0.03384	-0.06256	-0.74626	-0.46896	36.622	-2.00935	-2.65555	-1.57329	-2.06724
143.5	99.173	98.0843	98.2557	97.7109	40.081	-0.03417	-0.06257	-0.74466	-0.46889	36.722	-2.01623	-2.68705	-1.75719	-2.06881
145.2	99.17	98.0615	98.2434	97.6843	40.181	-0.03444	-0.06259	-0.74194	-0.46882	36.822	-2.02193	-2.721	-1.87368	-2.07098
146.9	99.166	98.0392	98.231	97.6592	40.281	-0.03481	-0.06264	-0.73704	-0.46878	36.922	-2.02783	-2.75461	-1.93973	-2.07304
148.6	99.1623	98.0178	98.2185	97.6356	40.381	-0.03519	-0.06272	-0.73377	-0.46876	37.022	-2.03576	-2.7923	-2.004	-2.0742
150.3	99.1605	97.9972	98.2057	97.6133	40.481	-0.03541	-0.06282	-0.73172	-0.46875	37.122	-2.04439	-2.83823	-2.18349	-2.07585
152	99.1601	97.977	98.1917	97.5921	40.581	-0.0356	-0.06294	-0.72915	-0.46875	37.222	-2.05092	-2.8739	-2.23146	-2.07693
153.7	99.1597	97.9578	98.1771	97.5721	40.681	-0.03587	-0.06307	-0.72613	-0.46876	37.322	-2.05651	-2.89531	-2.2913	-2.07835
155.4	99.1582	97.9395	98.1616	97.5527	40.781	-0.03623	-0.06319	-0.72262	-0.46878	37.422	-2.06264	-2.92245	-2.392	-2.07947
157.1	99.1541	97.9219	98.1443	97.5339	40.881	-0.03654	-0.06335	-0.71877	-0.46881	37.522	-2.06712	-2.95821	-2.45372	-2.08041
158.8	99.148	97.9053	98.1267	97.516	40.981	-0.0368	-0.06357	-0.71595	-0.46886	37.622	-2.06965	-2.99402	-2.61074	-2.0814
160.5	99.1407	97.8896	98.1086	97.4985	41.081	-0.03721	-0.06385	-0.71308	-0.46892	37.722	-2.07618	-3.0252	-2.6254	-2.08213
162.2	99.1324	97.875	98.0896	97.4817	41.181	-0.0376	-0.06407	-0.70863	-0.46898	37.822	-2.08565	-3.06238	-2.71106	-2.08262
163.9	99.1237	97.8615	98.0706	97.4653	41.281	-0.03782	-0.0643	-0.7042	-0.46906	37.922	-2.09035	-3.09478	-2.79703	-2.08327
165.6	99.1145	97.8491	98.0521	97.4495	41.381	-0.0381	-0.0646	-0.701	-0.46914	38.022	-2.09463	-3.11892	-2.8779	-2.08383
167.3	99.1058	97.8381	98.0337	97.4337	41.481	-0.03842	-0.06496	-0.6982	-0.46924	38.122	-2.1018	-3.14241	-2.96096	-2.08412
169	99.0964	97.8276	98.0156	97.4179	41.581	-0.03866	-0.06528	-0.69358	-0.46934	38.222	-2.10911	-3.1678	-3.01458	-2.08442
170.7	99.0872	97.8174	97.9978	97.402	41.681	-0.03894	-0.06554	-0.68868	-0.46944	38.322	-2.11413	-3.19626	-3.07283	-2.08469
172.4	99.0789	97.8075	97.9802	97.3855	41.781	-0.03937	-0.06581	-0.68528	-0.46957	38.422	-2.12105	-3.22898	-3.13755	-2.08489
174.1	99.073	97.7974	97.9628	97.3689	41.881	-0.03973	-0.06613	-0.68229	-0.4697	38.522	-2.12515	-3.25943	-3.21925	-2.085
175.8	99.0716	97.787	97.9455	97.3521	41.981	-0.04004	-0.06658	-0.67851	-0.46981	38.622	-2.1305	-3.28177	-3.29407	-2.08503
177.5	99.0749	97.7759	97.9279	97.3353	42.081	-0.04035	-0.06714	-0.67363	-0.46991	38.722	-2.1398	-3.30729	-3.36773	-2.085
179.2	99.0814	97.764	97.9102	97.3186	42.181	-0.04063	-0.06759	-0.6697	-0.47002	38.822	-2.14349	-3.33999	-3.42006	-2.0849
180.9	99.0889	97.7508	97.8916	97.302	42.281	-0.04094	-0.0679	-0.66676	-0.47015	38.922	-2.14612	-3.36664	-3.49082	-2.08475
182.6	99.0968	97.7366	97.8714	97.2853	42.381	-0.04138	-0.06819	-0.66372	-0.47029	39.022	-2.1513	-3.38921	-3.555	-2.08456
184.3	99.1035	97.7209	97.8498	97.2687	42.481	-0.04164	-0.06856	-0.65974	-0.47042	39.122	-2.15667	-3.41542	-3.60643	-2.08422
186	99.1092	97.7036	97.8276	97.2518	42.581	-0.04188	-0.06902	-0.65465	-0.47054	39.222	-2.16154	-3.4446	-3.65672	-2.08376
187.7	99.1134	97.6849	97.8046	97.2342	42.681	-0.04243	-0.06954	-0.64992	-0.47066	39.322	-2.16647	-3.47345	-3.72967	-2.08339
189.4	99.1156	97.6649	97.7803	97.216	42.781	-0.0428	-0.07008	-0.64633	-0.4708	39.422	-2.17173	-3.49893	-3.81229	-2.08295
191.1	99.1167	97.6437	97.7558	97.1977	42.881	-0.04296	-0.07058	-0.64354	-0.47094	39.522	-2.17708	-3.52155	-3.87418	-2.08239
192.8	99.1194	97.6215	97.7317	97.1785	42.981	-0.04321	-0.07103	-0.64002	-0.47108	39.622	-2.18242	-3.54392	-3.92924	-2.08175
194.5	99.1259	97.5985	97.7081	97.1589	43.081	-0.04356	-0.07146	-0.63529	-0.47125	39.722	-2.18797	-3.56829	-3.96194	-2.08109
196.2	99.1364	97.5752	97.6851	97.1394	43.181	-0.04392	-0.07191	-0.63155	-0.4714	39.822	-2.1923	-3.5958	-3.9735	-2.08036
197.9	99.1492	97.5526	97.6632	97.1202	43.281	-0.0443	-0.0724	-0.62877	-0.47152	39.922	-2.1959	-3.62176	-4.05842	-2.07961
199.6	99.1618	97.5304	97.6423	97.1008	43.381	-0.04464	-0.07296	-0.62549	-0.47164	40.022	-2.20102	-3.64232	-4.14411	-2.07891
201.3	99.1719	97.5089	97.6226	97.082	43.481	-0.04492	-0.07356	-0.62153	-0.47179	40.122	-2.20627	-3.66214	-4.16859	-2.07795
203	99.1779	97.4884	97.6038	97.0632	43.581	-0.04522	-0.07414	-0.61756	-0.47193	40.222	-2.21102	-3.68591	-4.24277	-2.07693
204.7	99.1792	97.4694	97.586	97.0448	43.681	-0.04554	-0.0747	-0.61328	-0.47206	40.322	-2.21764	-3.71187	-4.32363	-2.07616
206.4	99.1757	97.4517	97.5687	97.0271	43.781	-0.04582	-0.07526	-0.60869	-0.47221	40.422	-2.22242	-3.73706	-4.36486	-2.07541
208.1	99.1689	97.4354	97.5518	97.0089	43.881	-0.04609	-0.07582	-0.6053	-0.47235	40.522	-2.22532	-3.76079	-4.39993	-2.07451
209.8	99.1615	97.4208	97.5355	96.9903	43.981	-0.04641	-0.07641	-0.60287	-0.47247	40.622	-2.22868	-3.78269	-4.44403	-2.07337
211.5	99.1549	97.4074	97.5197	96.9716	44.081	-0.0467	-0.07702	-0.60009	-0.47261	40.722	-2.23328	-3.80229	-4.49301	-2.07231
213.2	99.1488	97.3956	97.5032	96.9524	44.181	-0.04693	-0.07763	-0.59635	-0.47278	40.822	-2.23859	-3.82047	-4.54892	-2.07129
214.9	99.142	97.3846	97.4865	96.9323	44.281	-0.0471	-0.07825	-0.59248	-0.47292	40.922	-2.24247	-3.84163	-4.60003	-2.07004
216.6	99.134	97.3743	97.47	96.9108	44.381	-0.04726	-0.07885	-0.58889	-0.47306	41.022	-2.24673	-3.8689	-4.63636	-2.06882
218.3	99.1259	97.3647	97.4534	96.8888	44.481	-0.04752	-0.07942	-0.58538	-0.47325	41.122	-2.25315	-3.89488	-4.68472	-2.06764
220	99.1205	97.3553	97.4366	96.8664	44.581	-0.04793	-0.07993	-0.58169	-0.47339	41.222	-2.25721	-3.91433	-4.74826	-2.06637
221.7	99.119	97.3457	97.419	96.8442	44.681	-0.04833	-0.08042	-0.57765	-0.47351	41.322	-2.26025	-3.93418	-4.80088	-2.06504
223.4	99.1203	97.3356	97.4011	96.8224	44.781	-0.04864	-0.08099	-0.57413	-0.47364	41.422	-2.26457	-3.95993	-4.83705	-2.06369
225.1	99.1219	97.3248	97.3832	96.8016	44.881	-0.04888	-0.08167	-0.57169	-0.47377	41.522	-2.2684	-3.98505	-4.87963	-2.06229
226.8	99.1218	97.3127	97.3652	96.7821	44.981	-0.04912	-0.08242	-0.56921	-0.47391	41.622	-2.27148	-4.00424	-4.94521	-2.06088
228.5	99.1209	97.2997	97.3468	96.7643	45.081	-0.04938	-0.08313	-0.56547	-0.47404	41.722	-2.27616	-4.02041	-4.99726	-2.05934
230.2	99.1205	97.286	97.3274	96.7475	45.181	-0.04965	-0.0838	-0.56124	-0.47416	41.822	-2.2816	-4.03732	-5.03476	-2.05763
231.9	99.1215	97.2721	97.3079	96.7313	45.281	-0.04995	-0.08444	-0.55785	-0.4743	41.922	-2.28573	-4.05843	-5.073	-2.05616
233.6	99.1227	97.2575	97.2878	96.7152	45.381	-0.05025	-0.08509	-0.55455	-0.47444	42.022	-2.28975	-4.08634	-5.12498	-2.0549
235.3	99.1227	97.2427	97.267	96.6991	45.481	-0.0505	-0.08576	-0.55086	-0.47456	42.122	-2.29355	-4.11429	-5.18043	-2.05364
237	99.1204	97.2277	97.2456	96.6828	45.581	-0.05074	-0.08644	-0.54761	-0.47469	42.222	-2.29692	-4.13313	-5.21996	-2.05224
238.7	99.1161	97.213	97.2229	96.6668	45.681	-0.05095	-0.08714	-0.54497	-0.47485	42.322	-2.30162	-4.14656	-5.2531	-2.05069
240.4	99.1115	97.199	97.1993	96.6504	45.781	-0.05115	-0.08785	-0.54224	-0.475	42.422	-2.30658	-4.16077	-5.29142	-2.04913
242.1	99.1063	97.1858	97.175	96.6337	45.881	-0.05138	-0.08857	-0.53907	-0.47512	42.522	-2.30908	-4.17918	-5.34303	-2.04767
243.8	99.1003	97.1739	97.1494	96.6166	45.981	-0.05166	-0.0893	-0.53583	-0.47525	42.622	-2.31349	-4.2005	-5.401	-2.04632
245.5	99.0922	97.1631	97.1235	96.599	46.081	-0.05189	-0.09002	-0.53274	-0.47542	42.722	-2.32021	-4.22291	-5.44931	-2.04485
247.2	99.0812	97.1534	97.0971	96.5807	46.181	-0.05208	-0.09071	-0.52966	-0.47557	42.822	-2.32315	-4.24416	-5.48425	-2.04322
248.9	99.0684	97.1442	97.0713	96.5616	46.281	-0.05233	-0.09136	-0.52658	-0.47571	42.922	-2.32515	-4.26264	-5.51647	-2.04163
250.6	99.0576	97.1353	97.0463	96.5415	46.381	-0.05256	-0.09195	-0.52376	-0.47584	43.022	-2.32891	-4.27925	-5.56265	-2.03992
252.3	99.0502	97.1263	97.0215	96.521	46.481	-0.05275	-0.09252	-0.52126	-0.47598	43.122	-2.3333	-4.29543	-5.61307	-2.03794
254	99.0472	97.1168	96.997	96.4996	46.581	-0.05296	-0.09313	-0.51885	-0.47613	43.222	-2.33765	-4.31227	-5.64799	-2.03634
255.7	99.0452	97.1068	96.9733	96.4772	46.681	-0.0532	-0.09384	-0.51638	-0.47626	43.322	-2.34216	-4.33049	-5.67907	-2.03506
257.4	99.0418	97.0962	96.9506	96.4546	46.781	-0.05339	-0.09465	-0.51382	-0.47637	43.422	-2.3459	-4.35035	-5.71903	-2.03347
259.1	99.0354	97.085	96.928	96.4315	46.881	-0.05358	-0.09549	-0.51117	-0.47651	43.522	-2.34923	-4.3704	-5.76298	-2.03167
260.8	99.0276	97.0738	96.9051	96.4076	46.981	-0.0538	-0.0963	-0.50845	-0.47669	43.622	-2.35309	-4.38913	-5.80681	-2.03009
262.5	99.0204	97.0622	96.883	96.3829	47.081	-0.05403	-0.0971	-0.50567	-0.47686	43.722	-2.35676	-4.40677	-5.85627	-2.02846
264.2	99.0142	97.0513	96.8609	96.3574	47.181	-0.05421	-0.09791	-0.50293	-0.477	43.822	-2.35994	-4.42416	-5.90265	-2.02662
265.9	99.0092	97.0407	96.838	96.3311	47.281	-0.05436	-0.09872	-0.50036	-0.47713	43.922	-2.3635	-4.44173	-5.93365	-2.02503
267.6	99.0042	97.0299	96.8139	96.3041	47.381	-0.05451	-0.0995	-0.49783	-0.47729	44.022	-2.36733	-4.45955	-5.95996	-2.02353
269.3	98.9998	97.0191	96.7891	96.277	47.481	-0.05466	-0.10024	-0.49518	-0.47748	44.122	-2.37062	-4.47755	-5.99504	-2.02159
271	98.997	97.008	96.7631	96.2496	47.581	-0.05481	-0.10095	-0.49258	-0.47768	44.222	-2.37312	-4.49539	-6.03774	-2.01959
272.7	98.9956	96.9968	96.7367	96.2225	47.681	-0.05497	-0.10164	-0.49041	-0.47786	44.322	-2.37495	-4.51268	-6.07878	-2.01792
274.4	98.9952	96.9853	96.7091	96.196	47.781	-0.05515	-0.10233	-0.48844	-0.47801	44.422	-2.37726	-4.52895	-6.11746	-2.01581
276.1	98.9945	96.9736	96.6804	96.1705	47.881	-0.05531	-0.10306	-0.48607	-0.47815	44.522	-2.38136	-4.54371	-6.1564	-2.01352
277.8	98.9925	96.9623	96.6519	96.146	47.981	-0.05547	-0.10384	-0.48316	-0.47832	44.622	-2.38663	-4.5571	-6.19887	-2.01186
279.5	98.9895	96.9515	96.6235	96.1217	48.081	-0.05567	-0.10468	-0.48057	-0.47855	44.722	-2.39117	-4.57077	-6.24275	-2.01033
281.2	98.9864	96.9412	96.5949	96.0973	48.181	-0.05586	-0.10553	-0.47857	-0.47878	44.822	-2.39455	-4.58657	-6.2763	-2.00856
282.9	98.9839	96.9315	96.567	96.0728	48.281	-0.056	-0.10635	-0.47671	-0.47898	44.922	-2.39756	-4.60501	-6.30168	-2.00669
284.6	98.9822	96.9219	96.5396	96.0477	48.381	-0.05613	-0.10713	-0.47461	-0.47919	45.022	-2.40074	-4.62384	-6.33399	-2.00488
286.3	98.9796	96.9128	96.5135	96.0217	48.481	-0.05627	-0.10791	-0.47222	-0.47942	45.122	-2.40411	-4.64106	-6.38077	-2.00321
288	98.9739	96.9037	96.4888	95.9948	48.581	-0.05642	-0.1087	-0.46962	-0.47967	45.222	-2.40782	-4.65698	-6.42459	-2.00149
289.7	98.9648	96.8944	96.465	95.9672	48.681	-0.05655	-0.10951	-0.46727	-0.47993	45.322	-2.41185	-4.67249	-6.46085	-1.99955
291.4	98.9548	96.8849	96.4416	95.9381	48.781	-0.05667	-0.11034	-0.46543	-0.48018	45.422	-2.41553	-4.68806	-6.50064	-1.99772
293.1	98.9468	96.875	96.4177	95.9084	48.881	-0.05682	-0.11118	-0.46376	-0.48045	45.522	-2.41879	-4.70376	-6.54191	-1.9961
294.8	98.9404	96.8647	96.3938	95.8784	48.981	-0.05702	-0.112	-0.46187	-0.48074	45.622	-2.4219	-4.71963	-6.57552	-1.99416
296.5	98.9339	96.8537	96.37	95.8481	49.081	-0.05721	-0.11277	-0.45976	-0.48102	45.722	-2.42477	-4.73565	-6.60537	-1.99196
298.2	98.9258	96.8422	96.3457	95.8175	49.181	-0.05735	-0.11354	-0.45767	-0.48128	45.822	-2.42758	-4.75178	-6.6392	-1.99021
299.9	98.9167	96.8301	96.3205	95.7866	49.281	-0.05749	-0.11438	-0.45578	-0.48156	45.922	-2.43113	-4.76789	-6.67709	-1.98856
301.6	98.908	96.8177	96.2955	95.7562	49.381	-0.05765	-0.11537	-0.45425	-0.4819	46.022	-2.43499	-4.78376	-6.71426	-1.9865
303.3	98.9013	96.8049	96.2695	95.7264	49.481	-0.0578	-0.11638	-0.45297	-0.48226	46.122	-2.4379	-4.79911	-6.75039	-1.98435
305	98.8958	96.7918	96.2425	95.6965	49.581	-0.05793	-0.11726	-0.45147	-0.48261	46.222	-2.44097	-4.81359	-6.78725	-1.98244
306.7	98.8895	96.7781	96.2146	95.667	49.681	-0.05808	-0.11799	-0.44935	-0.48293	46.322	-2.44477	-4.82684	-6.82314	-1.98068
308.4	98.8807	96.7643	96.1861	95.6373	49.781	-0.05826	-0.1187	-0.447	-0.48323	46.422	-2.44787	-4.83886	-6.85531	-1.97891
310.1	98.8716	96.7501	96.1565	95.6074	49.881	-0.05845	-0.11954	-0.44516	-0.48355	46.522	-2.45077	-4.85081	-6.88484	-1.97701
311.8	98.8644	96.7357	96.1265	95.5776	49.981	-0.05861	-0.12049	-0.44373	-0.48387	46.622	-2.45444	-4.86399	-6.91438	-1.97521
313.5	98.8586	96.7217	96.0962	95.5467	50.081	-0.05874	-0.12142	-0.44236	-0.48418	46.722	-2.45782	-4.87934	-6.94523	-1.97378
315.2	98.853	96.708	96.0658	95.515	50.181	-0.05889	-0.1222	-0.44089	-0.48451	46.822	-2.46075	-4.89595	-6.97736	-1.97231
316.9	98.8471	96.6942	96.0357	95.4822	50.281	-0.05908	-0.12291	-0.4393	-0.48494	46.922	-2.46412	-4.9124	-7.01072	-1.97031
318.6	98.8415	96.6799	96.0063	95.4489	50.381	-0.05928	-0.12368	-0.43763	-0.48539	47.022	-2.46786	-4.92822	-7.04533	-1.96816
320.3	98.8364	96.6652	95.9776	95.4152	50.481	-0.05947	-0.1246	-0.43612	-0.48571	47.122	-2.47142	-4.94377	-7.08065	-1.96639
322	98.831	96.6499	95.9495	95.3805	50.581	-0.05965	-0.12559	-0.43491	-0.48599	47.222	-2.47427	-4.95927	-7.11491	-1.96485
323.7	98.8227	96.6342	95.9212	95.345	50.681	-0.05987	-0.12648	-0.43386	-0.48638	47.322	-2.47677	-4.9744	-7.14753	-1.96328
325.4	98.8088	96.6181	95.8925	95.3088	50.781	-0.06012	-0.12722	-0.43277	-0.48691	47.422	-2.47934	-4.98871	-7.18101	-1.96143
327.1	98.7882	96.6008	95.8638	95.2728	50.881	-0.06032	-0.1279	-0.43152	-0.48735	47.522	-2.48202	-5.00217	-7.21642	-1.95927
328.8	98.7639	96.5826	95.8345	95.238	50.981	-0.06048	-0.12863	-0.43013	-0.48769	47.622	-2.48483	-5.01504	-7.24903	-1.95726
330.5	98.7394	96.5637	95.8056	95.2037	51.081	-0.06065	-0.12947	-0.42867	-0.48812	47.722	-2.48788	-5.02761	-7.27595	-1.9556
332.2	98.7181	96.5442	95.7764	95.1707	51.181	-0.0609	-0.1304	-0.42716	-0.48869	47.822	-2.49103	-5.04032	-7.30384	-1.95418
333.9	98.7011	96.524	95.7464	95.1387	51.281	-0.06124	-0.13136	-0.42564	-0.48926	47.922	-2.49389	-5.05366	-7.34029	-1.95273
335.6	98.6871	96.5029	95.7161	95.1064	51.381	-0.06147	-0.13229	-0.42424	-0.48973	48.022	-2.49723	-5.06804	-7.3803	-1.95093
337.3	98.6732	96.481	95.6854	95.0734	51.481	-0.06171	-0.13317	-0.42313	-0.4902	48.122	-2.50122	-5.083	-7.4126	-1.94878
339	98.6584	96.4588	95.6547	95.0391	51.581	-0.06221	-0.13398	-0.42222	-0.49071	48.222	-2.50433	-5.09765	-7.43928	-1.94682
340.7	98.6419	96.4364	95.6239	95.0031	51.681	-0.06252	-0.13475	-0.42131	-0.49134	48.322	-2.50688	-5.11151	-7.46698	-1.94509
342.4	98.626	96.4131	95.5932	94.9654	51.781	-0.06268	-0.13555	-0.42026	-0.49203	48.422	-2.50951	-5.12488	-7.49913	-1.9433
344.1	98.6126	96.3897	95.5627	94.9264	51.881	-0.06293	-0.13644	-0.41912	-0.49258	48.522	-2.51236	-5.13815	-7.53589	-1.9414
345.8	98.6016	96.3666	95.5315	94.8858	51.981	-0.06329	-0.13742	-0.41802	-0.49304	48.622	-2.51518	-5.15155	-7.57392	-1.93939
347.5	98.5907	96.3435	95.4997	94.8448	52.081	-0.06365	-0.13844	-0.41697	-0.49358	48.722	-2.51752	-5.16517	-7.60598	-1.93744
349.2	98.5785	96.3201	95.4676	94.8045	52.181	-0.064	-0.13944	-0.41595	-0.49426	48.822	-2.51998	-5.17903	-7.63216	-1.93558
350.9	98.5643	96.2971	95.4344	94.7642	52.281	-0.06436	-0.14039	-0.41494	-0.49506	48.922	-2.52347	-5.19278	-7.6588	-1.93363
352.6	98.5464	96.275	95.4006	94.7242	52.381	-0.0647	-0.14124	-0.414	-0.49584	49.022	-2.5273	-5.20586	-7.69016	-1.93163
354.3	98.5262	96.2526	95.3657	94.6845	52.481	-0.06505	-0.142	-0.41315	-0.49643	49.122	-2.53053	-5.21811	-7.72384	-1.92984
356	98.5024	96.2306	95.3302	94.6447	52.581	-0.06547	-0.14274	-0.41234	-0.49694	49.222	-2.53309	-5.23069	-7.75637	-1.92817
357.7	98.4786	96.2082	95.2935	94.604	52.681	-0.06595	-0.14356	-0.41148	-0.49756	49.322	-2.53577	-5.24499	-7.78489	-1.92627
359.4	98.4548	96.1849	95.2555	94.5622	52.781	-0.06643	-0.1445	-0.41057	-0.49833	49.422	-2.53874	-5.26104	-7.80757	-1.92418
361.1	98.4316	96.1604	95.2169	94.5196	52.881	-0.06686	-0.14546	-0.40966	-0.49916	49.522	-2.54125	-5.27634	-7.8294	-1.92211
362.8	98.4103	96.1338	95.1772	94.4763	52.981	-0.06734	-0.14636	-0.40882	-0.49998	49.622	-2.54358	-5.28879	-7.85855	-1.92023
364.5	98.3896	96.1058	95.1377	94.4319	53.081	-0.06787	-0.14715	-0.40806	-0.50073	49.722	-2.54639	-5.29964	-7.89845	-1.91857
366.2	98.3668	96.076	95.0963	94.3877	53.181	-0.06827	-0.1479	-0.40738	-0.50145	49.822	-2.54958	-5.31105	-7.93649	-1.91696
367.9	98.3381	96.0447	95.0544	94.3433	53.281	-0.06857	-0.14865	-0.40674	-0.5022	49.922	-2.55262	-5.32464	-7.96544	-1.91532
369.6	98.3024	96.0123	95.0126	94.2985	53.381	-0.06887	-0.14945	-0.40605	-0.50298	50.022	-2.55488	-5.33911	-7.99029	-1.91373
371.3	98.2604	95.9783	94.9692	94.2524	53.481	-0.06937	-0.15029	-0.40529	-0.50371	50.122	-2.55687	-5.35218	-8.01595	-1.91223
373	98.215	95.9426	94.9253	94.2052	53.581	-0.07026	-0.15115	-0.40455	-0.50443	50.222	-2.55945	-5.36319	-8.04399	-1.91053
374.7	98.1691	95.9067	94.8802	94.1562	53.681	-0.0709	-0.15201	-0.40391	-0.50518	50.322	-2.56243	-5.37382	-8.075	-1.90846
376.4	98.1224	95.8695	94.835	94.1057	53.781	-0.07127	-0.15287	-0.40335	-0.50599	50.422	-2.5652	-5.3859	-8.10638	-1.90665
378.1	98.0717	95.8311	94.7882	94.0537	53.881	-0.07191	-0.15371	-0.40278	-0.50678	50.522	-2.56766	-5.39993	-8.13342	-1.90541
379.8	98.0184	95.7906	94.7404	94.0005	53.981	-0.07261	-0.15453	-0.40219	-0.5075	50.622	-2.57015	-5.41388	-8.15558	-1.90416
381.5	97.9601	95.7481	94.6903	93.9455	54.081	-0.07305	-0.15532	-0.40164	-0.50838	50.722	-2.57324	-5.42573	-8.17655	-1.90228
383.2	97.8969	95.7034	94.6386	93.89	54.181	-0.07343	-0.15608	-0.40118	-0.50958	50.822	-2.5762	-5.43576	-8.20003	-1.9002
384.9	97.8271	95.6559	94.5852	93.8331	54.281	-0.07394	-0.15682	-0.40077	-0.5107	50.922	-2.5783	-5.44547	-8.22717	-1.8987
386.6	97.7551	95.6035	94.5297	93.7754	54.381	-0.07465	-0.15757	-0.40034	-0.51147	51.022	-2.5801	-5.45632	-8.25704	-1.89739
388.3	97.6827	95.547	94.4728	93.7163	54.481	-0.07545	-0.15839	-0.39982	-0.51214	51.122	-2.58229	-5.46874	-8.28888	-1.89559
390	97.6081	95.4887	94.4135	93.6562	54.581	-0.07608	-0.15936	-0.39926	-0.51295	51.222	-2.58548	-5.48193	-8.32239	-1.89347
391.7	97.5322	95.4304	94.354	93.5926	54.681	-0.07669	-0.16043	-0.39874	-0.51392	51.322	-2.58876	-5.49506	-8.35605	-1.89167
393.4	97.4509	95.3705	94.2933	93.5258	54.781	-0.07748	-0.16147	-0.3983	-0.51491	51.422	-2.59068	-5.50762	-8.38557	-1.89012
395.1	97.3616	95.3083	94.2309	93.4581	54.881	-0.07813	-0.16238	-0.39792	-0.51596	51.522	-2.59395	-5.51928	-8.40895	-1.88856
396.8	97.264	95.242	94.1678	93.3879	54.981	-0.07877	-0.16317	-0.39758	-0.5173	51.622	-2.59821	-5.52994	-8.43005	-1.88678
398.5	97.1586	95.1725	94.1023	93.3163	55.081	-0.07986	-0.16393	-0.39723	-0.51869	51.722	-2.60006	-5.54034	-8.45344	-1.8847
400.2	97.0454	95.0977	94.0359	93.2431	55.181	-0.08077	-0.1647	-0.3968	-0.51975	51.822	-2.60142	-5.5514	-8.48068	-1.88276
401.9	96.9324	95.022	93.9677	93.1676	55.281	-0.08153	-0.16552	-0.39634	-0.52063	51.922	-2.60394	-5.56381	-8.50921	-1.8813
403.6	96.8214	94.9497	93.8963	93.0882	55.381	-0.08265	-0.16638	-0.39595	-0.52157	52.022	-2.6068	-5.57711	-8.53691	-1.87995
405.3	96.7078	94.8703	93.8215	93.0073	55.481	-0.0835	-0.16728	-0.39568	-0.52262	52.122	-2.60941	-5.59052	-8.56416	-1.87827
407	96.5935	94.7844	93.7445	92.9225	55.581	-0.08404	-0.16822	-0.39545	-0.52374	52.222	-2.61199	-5.60337	-8.59172	-1.87625
408.7	96.4758	94.6948	93.6634	92.8335	55.681	-0.08457	-0.16916	-0.3952	-0.5249	52.322	-2.6144	-5.61517	-8.61892	-1.87409
410.4	96.3522	94.6068	93.5781	92.7402	55.781	-0.08531	-0.17007	-0.39493	-0.52607	52.422	-2.61661	-5.62555	-8.64434	-1.87226
412.1	96.2223	94.5208	93.486	92.6427	55.881	-0.08635	-0.17097	-0.39467	-0.52727	52.522	-2.61902	-5.63511	-8.66813	-1.87091
413.8	96.0911	94.4298	93.3902	92.5422	55.981	-0.0873	-0.17187	-0.39444	-0.52857	52.622	-2.6218	-5.6449	-8.69245	-1.8696
415.5	95.9635	94.3299	93.2875	92.4382	56.081	-0.08799	-0.17279	-0.39423	-0.52993	52.722	-2.62472	-5.65593	-8.71924	-1.86792
417.2	95.8285	94.2174	93.1812	92.3307	56.181	-0.08873	-0.1737	-0.39402	-0.53123	52.822	-2.62736	-5.66803	-8.74766	-1.86599
418.9	95.6809	94.0935	93.0688	92.2193	56.281	-0.08961	-0.17458	-0.39382	-0.53243	52.922	-2.62977	-5.67995	-8.77575	-1.86407
420.6	95.5272	93.9671	92.9484	92.1027	56.381	-0.09056	-0.1754	-0.39362	-0.53363	53.022	-2.63251	-5.69059	-8.80226	-1.86229
422.3	95.3668	93.8399	92.8233	91.981	56.481	-0.0916	-0.17619	-0.39344	-0.53486	53.122	-2.63502	-5.70012	-8.82655	-1.86068
424	95.1982	93.7116	92.6934	91.853	56.581	-0.09273	-0.17703	-0.39328	-0.53608	53.222	-2.63676	-5.70928	-8.84895	-1.85911
425.7	95.0149	93.5792	92.558	91.7194	56.681	-0.09389	-0.17796	-0.39313	-0.53729	53.322	-2.63816	-5.71875	-8.87197	-1.85749
427.4	94.8267	93.4416	92.4141	91.5778	56.781	-0.09481	-0.17894	-0.393	-0.53849	53.422	-2.63986	-5.72878	-8.89826	-1.85589
429.1	94.6376	93.2955	92.2583	91.4274	56.881	-0.09563	-0.17986	-0.39288	-0.5397	53.522	-2.6429	-5.73914	-8.92694	-1.85442
430.8	94.4413	93.1424	92.0944	91.2678	56.981	-0.09659	-0.1806	-0.39276	-0.54091	53.622	-2.6469	-5.74961	-8.95387	-1.85298
432.5	94.2431	92.9822	91.9283	91.0999	57.081	-0.09757	-0.18124	-0.39266	-0.54211	53.722	-2.6489	-5.76001	-8.9774	-1.85145
434.2	94.0516	92.8176	91.7602	90.9249	57.181	-0.09846	-0.18191	-0.39256	-0.54336	53.822	-2.65068	-5.77023	-9.00012	-1.84988
435.9	93.8563	92.6526	91.5884	90.747	57.281	-0.09932	-0.18272	-0.39247	-0.54469	53.922	-2.65369	-5.78018	-9.02465	-1.84846
437.6	93.6607	92.4831	91.4094	90.5613	57.381	-0.10013	-0.18375	-0.39239	-0.54607	54.022	-2.65603	-5.7898	-9.04994	-1.84704
439.3	93.4556	92.3073	91.227	90.3717	57.481	-0.10092	-0.18484	-0.39232	-0.54739	54.122	-2.65752	-5.79904	-9.07287	-1.8452
441	93.2487	92.1252	91.0332	90.1775	57.581	-0.10184	-0.18581	-0.39225	-0.54862	54.222	-2.65909	-5.80789	-9.09235	-1.843
442.7	93.0599	91.9451	90.8305	89.9767	57.681	-0.10296	-0.18663	-0.3922	-0.54987	54.322	-2.66128	-5.8165	-9.1116	-1.84129
444.4	92.8664	91.7578	90.6251	89.7719	57.781	-0.10392	-0.1874	-0.39216	-0.55119	54.422	-2.66411	-5.82553	-9.13432	-1.8401
446.1	92.6602	91.5679	90.4149	89.5616	57.881	-0.10476	-0.18824	-0.39213	-0.55255	54.522	-2.66675	-5.83572	-9.16185	-1.83892
447.8	92.4563	91.3736	90.1984	89.3453	57.981	-0.10593	-0.18922	-0.39211	-0.55391	54.622	-2.66875	-5.84756	-9.19061	-1.83743
449.5	92.2436	91.1658	89.9791	89.1214	58.081	-0.10727	-0.19022	-0.39209	-0.55535	54.722	-2.67105	-5.85999	-9.21722	-1.8358
451.2	92.0281	90.9533	89.7555	88.8957	58.181	-0.10847	-0.19118	-0.39208	-0.55699	54.822	-2.67359	-5.87138	-9.24093	-1.8342
452.9	91.8432	90.7425	89.5298	88.6662	58.281	-0.10944	-0.19204	-0.39208	-0.55867	54.922	-2.67547	-5.8811	-9.26168	-1.83238
454.6	91.6575	90.5324	89.303	88.4369	58.381	-0.11031	-0.19284	-0.39208	-0.56012	55.022	-2.67799	-5.88982	-9.28197	-1.83018
456.3	91.4568	90.3182	89.0768	88.2072	58.481	-0.1112	-0.19359	-0.39209	-0.56143	55.122	-2.68148	-5.89834	-9.30606	-1.82824
458	91.2606	90.1006	88.8456	87.9755	58.581	-0.11214	-0.19433	-0.39211	-0.56279	55.222	-2.68372	-5.90724	-9.33657	-1.82681
459.7	91.0668	89.8828	88.6106	87.7384	58.681	-0.1131	-0.19509	-0.39213	-0.56428	55.322	-2.68639	-5.9166	-9.36732	-1.82551
461.4	90.8816	89.6696	88.373	87.4994	58.781	-0.11405	-0.19593	-0.39216	-0.56578	55.422	-2.68951	-5.92642	-9.39136	-1.82408
463.1	90.7012	89.4572	88.1404	87.2647	58.881	-0.11493	-0.19688	-0.3922	-0.56725	55.522	-2.69141	-5.93666	-9.41074	-1.82252
464.8	90.5459	89.2402	87.9075	87.0245	58.981	-0.1159	-0.19786	-0.39225	-0.56869	55.622	-2.69279	-5.94705	-9.42987	-1.82092
466.5	90.4059	89.0265	87.6727	86.7839	59.081	-0.11717	-0.1988	-0.3923	-0.57015	55.722	-2.69442	-5.9573	-9.45161	-1.81931
468.2	90.2516	88.8127	87.4402	86.5444	59.181	-0.11834	-0.19965	-0.39236	-0.57162	55.822	-2.69676	-5.96722	-9.4747	-1.8177
469.9	90.0976	88.6125	87.2038	86.3077	59.281	-0.11925	-0.20044	-0.39241	-0.57308	55.922	-2.69959	-5.97698	-9.49729	-1.81605
471.6	89.9524	88.4227	86.9695	86.0714	59.381	-0.12007	-0.20123	-0.39246	-0.5746	56.022	-2.70171	-5.98682	-9.51899	-1.81427
473.3	89.8122	88.2357	86.7374	85.8379	59.481	-0.12102	-0.20208	-0.39252	-0.57628	56.122	-2.70345	-5.99677	-9.54066	-1.81251
475	89.6761	88.0423	86.5092	85.6083	59.581	-0.12209	-0.20296	-0.39261	-0.57805	56.222	-2.70548	-6.0065	-9.56308	-1.81091
476.7	89.5435	87.8454	86.2841	85.3782	59.681	-0.12302	-0.20383	-0.39273	-0.57969	56.322	-2.70776	-6.01566	-9.58604	-1.8094
478.4	89.4152	87.65	86.0635	85.148	59.781	-0.12395	-0.20464	-0.39285	-0.58118	56.422	-2.71017	-6.02421	-9.60896	-1.80789
480.1	89.2923	87.4516	85.8495	84.9231	59.881	-0.125	-0.20541	-0.39294	-0.58278	56.522	-2.71278	-6.03277	-9.63143	-1.80638
481.8	89.1723	87.2541	85.6394	84.6992	59.981	-0.12604	-0.20618	-0.393	-0.58455	56.622	-2.71556	-6.04201	-9.65339	-1.8049
483.5	89.0543	87.0697	85.4331	84.4831	60.081	-0.1271	-0.20702	-0.39306	-0.58624	56.722	-2.71811	-6.05219	-9.6748	-1.80345
485.2	88.9397	86.8974	85.2282	84.2715	60.181	-0.12809	-0.20792	-0.39315	-0.5877	56.822	-2.72007	-6.06233	-9.69575	-1.80203
486.9	88.8258	86.7331	85.0243	84.0597	60.281	-0.12888	-0.20886	-0.39326	-0.58908	56.922	-2.72206	-6.07122	-9.71643	-1.80061
488.6	88.7128	86.568	84.8252	83.8568	60.381	-0.12967	-0.2098	-0.39337	-0.59061	57.022	-2.72432	-6.07839	-9.73705	-1.79922
490.3	88.6014	86.4039	84.6311	83.66	60.481	-0.13062	-0.21071	-0.39347	-0.59232	57.122	-2.72645	-6.08499	-9.75798	-1.79783
492	88.4951	86.2491	84.4451	83.4624	60.581	-0.13145	-0.21159	-0.39356	-0.59418	57.222	-2.7284	-6.09234	-9.77965	-1.79639
493.7	88.3852	86.0977	84.2593	83.2689	60.681	-0.13214	-0.21243	-0.39366	-0.59601	57.322	-2.73026	-6.10169	-9.8021	-1.79487
495.4	88.2732	85.9504	84.0789	83.08	60.781	-0.13291	-0.21323	-0.39377	-0.59755	57.422	-2.73202	-6.11276	-9.82478	-1.79336
497.1	88.1668	85.805	83.9008	82.8945	60.881	-0.13384	-0.21402	-0.39389	-0.59886	57.522	-2.73381	-6.12363	-9.8471	-1.79197
498.8	88.0658	85.6648	83.7235	82.7133	60.981	-0.13486	-0.21481	-0.39401	-0.60026	57.622	-2.73602	-6.13273	-9.86875	-1.79066
500.5	87.9733	85.5248	83.5468	82.5369	61.081	-0.13586	-0.21563	-0.39413	-0.60205	57.722	-2.73841	-6.14065	-9.8895	-1.7893
502.2	87.8879	85.3895	83.3735	82.3662	61.181	-0.13676	-0.21647	-0.39425	-0.60395	57.822	-2.74024	-6.1486	-9.90941	-1.78788
503.9	87.8041	85.2618	83.2055	82.2016	61.281	-0.1376	-0.21731	-0.39437	-0.60562	57.922	-2.74224	-6.15767	-9.92904	-1.78647
505.6	87.7232	85.1384	83.0448	82.0428	61.381	-0.13853	-0.21814	-0.39449	-0.60713	58.022	-2.74496	-6.16767	-9.94906	-1.78504
507.3	87.6489	85.0175	82.8871	81.8873	61.481	-0.13936	-0.21895	-0.39461	-0.60875	58.122	-2.74773	-6.17761	-9.96977	-1.7835
509	87.5734	84.8965	82.7318	81.7381	61.581	-0.13996	-0.21976	-0.39473	-0.61053	58.222	-2.75001	-6.18671	-9.99095	-1.7818
510.7	87.4979	84.7759	82.5848	81.5925	61.681	-0.14076	-0.22056	-0.39485	-0.61235	58.322	-2.7519	-6.19495	-10.0123	-1.7802
512.4	87.4193	84.6588	82.4457	81.4484	61.781	-0.1419	-0.22137	-0.39496	-0.61412	58.422	-2.75371	-6.20259	-10.0335	-1.77885
514.1	87.3385	84.5527	82.3109	81.308	61.881	-0.14277	-0.22219	-0.39508	-0.6158	58.522	-2.75557	-6.20987	-10.0541	-1.77759
515.8	87.2621	84.4489	82.1753	81.1714	61.981	-0.14347	-0.22303	-0.39519	-0.61739	58.622	-2.75754	-6.21716	-10.074	-1.77622
517.5	87.1877	84.3396	82.0376	81.0369	62.081	-0.14416	-0.2239	-0.39532	-0.61903	58.722	-2.75953	-6.22487	-10.0939	-1.77478
519.2	87.1151	84.2246	81.9011	80.9076	62.181	-0.14491	-0.2248	-0.39547	-0.62084	58.822	-2.76142	-6.23343	-10.1149	-1.77337
520.9	87.041	84.1125	81.7661	80.781	62.281	-0.14578	-0.22572	-0.39562	-0.6227	58.922	-2.7632	-6.24281	-10.137	-1.77202
522.6	86.9665	84.0058	81.6333	80.6572	62.381	-0.14675	-0.22666	-0.39576	-0.6244	59.022	-2.76544	-6.25222	-10.1592	-1.77068
524.3	86.8916	83.9044	81.5062	80.5347	62.481	-0.14767	-0.22758	-0.3959	-0.626	59.122	-2.76807	-6.26089	-10.1805	-1.76934
526	86.8144	83.8041	81.383	80.4159	62.581	-0.14881	-0.22844	-0.39602	-0.62774	59.222	-2.77018	-6.26869	-10.2001	-1.76801
527.7	86.7363	83.7012	81.2595	80.298	62.681	-0.14974	-0.22922	-0.39614	-0.62966	59.322	-2.7719	-6.27617	-10.2175	-1.76669
529.4	86.6591	83.6	81.1391	80.1812	62.781	-0.1502	-0.22995	-0.39626	-0.63145	59.422	-2.77363	-6.28389	-10.2335	-1.76529
531.1	86.5838	83.5021	81.0211	80.0645	62.881	-0.15074	-0.23067	-0.39638	-0.63297	59.522	-2.77571	-6.29208	-10.2526	-1.76375
532.8	86.5086	83.4088	80.9029	79.9499	62.981	-0.15155	-0.23143	-0.3965	-0.63447	59.622	-2.77778	-6.30038	-10.2798	-1.76224
534.5	86.4376	83.3176	80.7871	79.8332	63.081	-0.15229	-0.23224	-0.39663	-0.63621	59.722	-2.77961	-6.30833	-10.3119	-1.7609
536.2	86.3692	83.2263	80.6732	79.7161	63.181	-0.15304	-0.23309	-0.39677	-0.63814	59.822	-2.7816	-6.3157	-10.3366	-1.75961
537.9	86.3028	83.1375	80.5621	79.5974	63.281	-0.15385	-0.23397	-0.39692	-0.63998	59.922	-2.78373	-6.32285	-10.3522	-1.75819
539.6	86.2346	83.05	80.4531	79.4786	63.381	-0.15456	-0.23487	-0.39705	-0.64167	60.022	-2.78583	-6.33022	-10.3644	-1.7567
541.3	86.1628	82.9627	80.3465	79.3613	63.481	-0.15525	-0.23577	-0.39717	-0.6433	60.122	-2.78797	-6.33821	-10.3789	-1.75538
543	86.0883	82.8764	80.2429	79.2449	63.581	-0.15598	-0.23664	-0.39727	-0.64493	60.222	-2.78981	-6.34671	-10.3981	-1.75423
544.7	86.01	82.7909	80.1431	79.1299	63.681	-0.15653	-0.23747	-0.39737	-0.64653	60.322	-2.79133	-6.35537	-10.4192	-1.75307
546.4	85.9301	82.7095	80.0443	79.0197	63.781	-0.15707	-0.23828	-0.39751	-0.64807	60.422	-2.79309	-6.36388	-10.4388	-1.75177
548.1	85.8531	82.6299	79.9462	78.9123	63.881	-0.15798	-0.23909	-0.39767	-0.64965	60.522	-2.795	-6.37207	-10.4564	-1.75035
549.8	85.7768	82.5496	79.8484	78.8084	63.981	-0.15876	-0.23993	-0.39782	-0.65144	60.622	-2.79652	-6.37989	-10.4734	-1.74886
551.5	85.6992	82.4732	79.7516	78.7048	64.081	-0.15931	-0.24079	-0.39793	-0.65341	60.722	-2.79794	-6.38729	-10.491	-1.74749
553.2	85.6199	82.3965	79.6598	78.6042	64.181	-0.16016	-0.24167	-0.39803	-0.65528	60.822	-2.79965	-6.39441	-10.5096	-1.74639
554.9	85.5412	82.3202	79.57	78.5039	64.281	-0.16094	-0.24255	-0.39813	-0.65687	60.922	-2.80166	-6.40146	-10.5287	-1.74538
556.6	85.4631	82.2445	79.481	78.4042	64.381	-0.16155	-0.24344	-0.39823	-0.65837	61.022	-2.80377	-6.40864	-10.5481	-1.74419
558.3	85.391	82.1702	79.394	78.3065	64.481	-0.16227	-0.24431	-0.39835	-0.65995	61.122	-2.80574	-6.41602	-10.5675	-1.74276
560	85.3264	82.0982	79.3064	78.2104	64.581	-0.16294	-0.24516	-0.39846	-0.66167	61.222	-2.80751	-6.42346	-10.5864	-1.74138
561.7	85.2627	82.0276	79.2172	78.1146	64.681	-0.16371	-0.246	-0.39856	-0.66352	61.322	-2.80929	-6.43083	-10.6047	-1.7402
563.4	85.194	81.9562	79.1302	78.0176	64.781	-0.16468	-0.24686	-0.39867	-0.66544	61.422	-2.81122	-6.43805	-10.6225	-1.73907
565.1	85.1182	81.8847	79.0424	77.9247	64.881	-0.16519	-0.24778	-0.3988	-0.66731	61.522	-2.8127	-6.44514	-10.6401	-1.73783
566.8	85.0376	81.814	78.9555	77.8328	64.981	-0.16558	-0.24875	-0.39895	-0.66905	61.622	-2.81398	-6.45216	-10.6573	-1.73651
568.5	84.9506	81.7434	78.8714	77.7402	65.081	-0.16628	-0.24971	-0.39909	-0.67069	61.722	-2.81604	-6.45915	-10.6742	-1.73521
570.2	84.8631	81.6735	78.7893	77.6494	65.181	-0.16714	-0.25062	-0.39918	-0.67224	61.822	-2.81826	-6.46618	-10.6906	-1.73396
571.9	84.7796	81.6023	78.707	77.5581	65.281	-0.16788	-0.25147	-0.39926	-0.6738	61.922	-2.81986	-6.47332	-10.7069	-1.73281
573.6	84.6992	81.5321	78.6254	77.468	65.381	-0.16841	-0.25228	-0.39934	-0.67542	62.022	-2.82129	-6.48063	-10.7241	-1.73168
575.3	84.6208	81.4636	78.5448	77.3773	65.481	-0.16891	-0.25309	-0.39943	-0.6772	62.122	-2.82278	-6.48814	-10.7431	-1.7305
577	84.5416	81.3949	78.4689	77.2867	65.581	-0.16988	-0.25392	-0.39953	-0.6792	62.222	-2.82442	-6.49586	-10.7637	-1.72921
578.7	84.4628	81.3262	78.3936	77.1971	65.681	-0.17086	-0.25476	-0.39964	-0.68136	62.322	-2.82637	-6.50375	-10.7842	-1.72797
580.4	84.3828	81.2558	78.3179	77.1073	65.781	-0.17124	-0.25563	-0.39975	-0.6833	62.422	-2.82838	-6.51164	-10.8035	-1.72686
582.1	84.301	81.1888	78.2435	77.0195	65.881	-0.1715	-0.25653	-0.39985	-0.68489	62.522	-2.83041	-6.51918	-10.8216	-1.72576
583.8	84.2188	81.124	78.1687	76.9331	65.981	-0.17194	-0.25742	-0.39994	-0.68642	62.622	-2.83288	-6.52606	-10.8385	-1.72454
585.5	84.135	81.0582	78.0948	76.8469	66.081	-0.17265	-0.25829	-0.40002	-0.6882	62.722	-2.83432	-6.53234	-10.8544	-1.72327
587.2	84.0508	80.9933	78.0242	76.7639	66.181	-0.17334	-0.25912	-0.40011	-0.69012	62.822	-2.83523	-6.53834	-10.8702	-1.72217
588.9	83.978	80.929	77.9527	76.6821	66.281	-0.1738	-0.25993	-0.40018	-0.69192	62.922	-2.83667	-6.54441	-10.8862	-1.72121
590.6	83.9026	80.8633	77.8801	76.6029	66.381	-0.17431	-0.26075	-0.40026	-0.6936	63.022	-2.83837	-6.55082	-10.9032	-1.72019
592.3	83.8278	80.7992	77.805	76.5239	66.481	-0.17495	-0.26162	-0.40034	-0.69531	63.122	-2.83988	-6.55758	-10.9214	-1.71901
594	83.7528	80.737	77.7306	76.4472	66.581	-0.1756	-0.26256	-0.40043	-0.69711	63.222	-2.84156	-6.56461	-10.941	-1.71778
595.7	83.6748	80.6747	77.6577	76.3726	66.681	-0.17617	-0.26353	-0.40051	-0.69884	63.322	-2.84322	-6.57184	-10.9609	-1.71667
597.4	83.5937	80.6128	77.5862	76.2988	66.781	-0.17668	-0.26451	-0.40059	-0.70042	63.422	-2.84465	-6.57912	-10.9787	-1.71563
599.1	83.5173	80.5541	77.5162	76.2261	66.881	-0.1772	-0.26548	-0.40068	-0.70196	63.522	-2.84619	-6.58625	-10.9931	-1.71462
600.8	83.4392	80.4973	77.4457	76.1566	66.981	-0.17776	-0.26643	-0.40076	-0.70359	63.622	-2.84762	-6.59305	-11.0066	-1.71362
602.5	83.3598	80.4413	77.375	76.0848	67.081	-0.17841	-0.26734	-0.40084	-0.70529	63.722	-2.84866	-6.59957	-11.0226	-1.71266
604.2	83.2878	80.3881	77.3061	76.0129	67.181	-0.17909	-0.26822	-0.40091	-0.70694	63.822	-2.85009	-6.60599	-11.0433	-1.71173
605.9	83.2126	80.3376	77.2391	75.9393	67.281	-0.17961	-0.26909	-0.40096	-0.7085	63.922	-2.85213	-6.61248	-11.0657	-1.71074
607.6	83.1336	80.2873	77.1714	75.8659	67.381	-0.18012	-0.26995	-0.40102	-0.71018	64.022	-2.85344	-6.61913	-11.0846	-1.70961
609.3	83.0552	80.2354	77.1058	75.7922	67.481	-0.18066	-0.27081	-0.40108	-0.71211	64.122	-2.8548	-6.6259	-11.0994	-1.70845
611	82.9758	80.1845	77.0422	75.718	67.581	-0.18117	-0.27166	-0.40115	-0.714	64.222	-2.85672	-6.63275	-11.1128	-1.70742
612.7	82.8924	80.1332	76.9794	75.6438	67.681	-0.1815	-0.27248	-0.40122	-0.71547	64.322	-2.85813	-6.6396	-11.1271	-1.70653
614.4	82.8059	80.083	76.9163	75.5676	67.781	-0.18181	-0.27325	-0.40129	-0.71667	64.422	-2.85949	-6.64637	-11.1431	-1.70566
616.1	82.7199	80.0331	76.8557	75.4925	67.881	-0.18249	-0.27399	-0.40135	-0.71799	64.522	-2.86101	-6.65297	-11.1596	-1.70472
617.8	82.6346	79.9818	76.7952	75.4172	67.981	-0.18311	-0.27475	-0.40141	-0.71975	64.622	-2.8624	-6.65936	-11.1752	-1.70371
619.5	82.5523	79.9326	76.7358	75.3403	68.081	-0.1835	-0.2756	-0.40146	-0.72173	64.722	-2.86433	-6.66576	-11.1904	-1.70265
621.2	82.4719	79.8811	76.6784	75.2633	68.181	-0.18407	-0.27657	-0.4015	-0.72357	64.822	-2.86603	-6.67241	-11.2077	-1.70158
622.9	82.3888	79.8266	76.6206	75.186	68.281	-0.18457	-0.27761	-0.40155	-0.72522	64.922	-2.86687	-6.67948	-11.2291	-1.70058
624.6	82.305	79.7738	76.5622	75.1072	68.381	-0.18509	-0.27863	-0.40161	-0.72676	65.022	-2.86791	-6.68674	-11.2517	-1.69965
626.3	82.2197	79.724	76.5054	75.0292	68.481	-0.18563	-0.27958	-0.40167	-0.72828	65.122	-2.86958	-6.69378	-11.2703	-1.69879
628	82.1345	79.6739	76.4486	74.9509	68.581	-0.18599	-0.28048	-0.40172	-0.72986	65.222	-2.87135	-6.70028	-11.284	-1.69795
629.7	82.0482	79.6238	76.3914	74.8761	68.681	-0.18627	-0.28139	-0.40177	-0.73155	65.322	-2.87268	-6.70636	-11.2958	-1.69712
631.4	81.9649	79.5731	76.3344	74.8026	68.781	-0.18663	-0.28233	-0.40181	-0.73328	65.422	-2.8737	-6.71223	-11.3086	-1.69623
633.1	81.8842	79.5237	76.2787	74.7318	68.881	-0.18721	-0.28331	-0.40185	-0.73497	65.522	-2.87501	-6.71813	-11.3245	-1.69525
634.8	81.8058	79.4742	76.2236	74.6625	68.981	-0.18764	-0.28429	-0.4019	-0.73662	65.622	-2.8774	-6.72415	-11.3423	-1.69417
636.5	81.7302	79.4241	76.1681	74.5949	69.081	-0.18792	-0.28523	-0.40194	-0.73826	65.722	-2.87884	-6.7303	-11.3603	-1.69308
638.2	81.659	79.3744	76.1126	74.5296	69.181	-0.18831	-0.28616	-0.40198	-0.73988	65.822	-2.87941	-6.73658	-11.3777	-1.69217
639.9	81.587	79.3253	76.0577	74.4659	69.281	-0.18868	-0.28709	-0.40202	-0.74143	65.922	-2.88007	-6.74293	-11.3942	-1.69141
641.6	81.5141	79.277	76.0025	74.4026	69.381	-0.18899	-0.28808	-0.40206	-0.7429	66.022	-2.88119	-6.7492	-11.4098	-1.69061
643.3	81.4403	79.2294	75.9458	74.3387	69.481	-0.18933	-0.2891	-0.40209	-0.74436	66.122	-2.88279	-6.75522	-11.4247	-1.68968
645	81.3681	79.1827	75.889	74.2737	69.581	-0.18965	-0.29015	-0.40212	-0.74589	66.222	-2.88399	-6.76092	-11.4392	-1.68875
646.7	81.2935	79.1359	75.8327	74.2085	69.681	-0.18996	-0.29118	-0.40216	-0.74749	66.322	-2.88491	-6.76653	-11.4538	-1.68791
648.4	81.2155	79.0907	75.7758	74.1442	69.781	-0.19034	-0.29218	-0.40219	-0.74909	66.422	-2.88609	-6.7723	-11.4686	-1.68711
650.1	81.1351	79.0473	75.7196	74.0795	69.881	-0.19069	-0.29317	-0.40223	-0.75067	66.522	-2.88745	-6.77847	-11.4838	-1.68628
651.8	81.0522	79.0044	75.6634	74.0158	69.981	-0.19099	-0.29414	-0.40226	-0.75227	66.622	-2.88874	-6.785	-11.4997	-1.68545
653.5	80.9672	78.9618	75.6103	73.9532	70.081	-0.19132	-0.29508	-0.40229	-0.75392	66.722	-2.88985	-6.79165	-11.5162	-1.68467
655.2	80.8859	78.9205	75.5592	73.8914	70.181	-0.19158	-0.29596	-0.40232	-0.75555	66.822	-2.8909	-6.79825	-11.5333	-1.68396
656.9	80.8089	78.8791	75.5066	73.8304	70.281	-0.19179	-0.29676	-0.40235	-0.7571	66.922	-2.892	-6.80468	-11.5509	-1.68325
658.6	80.7343	78.8384	75.4551	73.7718	70.381	-0.19206	-0.29748	-0.40237	-0.7586	67.022	-2.89323	-6.81089	-11.5678	-1.68249
660.3	80.6639	78.7981	75.4043	73.7137	70.481	-0.19235	-0.29819	-0.4024	-0.76014	67.122	-2.89464	-6.81684	-11.5831	-1.68174
662	80.5936	78.7574	75.3539	73.6579	70.581	-0.19265	-0.29897	-0.40243	-0.76172	67.222	-2.89592	-6.82259	-11.5967	-1.68103
663.7	80.5235	78.716	75.304	73.6027	70.681	-0.19293	-0.29989	-0.40246	-0.76325	67.322	-2.89695	-6.82821	-11.6097	-1.68033
665.4	80.4555	78.6746	75.2571	73.5485	70.781	-0.19316	-0.30096	-0.40248	-0.76463	67.422	-2.89804	-6.83381	-11.6232	-1.67957
667.1	80.3879	78.634	75.211	73.4948	70.881	-0.19343	-0.30208	-0.4025	-0.76596	67.522	-2.89916	-6.83937	-11.638	-1.67873
668.8	80.3209	78.594	75.1661	73.4403	70.981	-0.19366	-0.30312	-0.40253	-0.76731	67.622	-2.90008	-6.84477	-11.654	-1.67799
670.5	80.2557	78.5519	75.1207	73.3858	71.081	-0.19381	-0.30407	-0.40256	-0.76876	67.722	-2.90066	-6.84987	-11.6708	-1.67744
672.2	80.1936	78.5081	75.0755	73.3312	71.181	-0.19393	-0.305	-0.40258	-0.77031	67.822	-2.90156	-6.85465	-11.6877	-1.67694
673.9	80.1336	78.4644	75.0312	73.2761	71.281	-0.1941	-0.30599	-0.4026	-0.77195	67.922	-2.90315	-6.85936	-11.7035	-1.67634
675.6	80.075	78.4207	74.9882	73.221	71.381	-0.19434	-0.30708	-0.40262	-0.77359	68.022	-2.90413	-6.86434	-11.7172	-1.67557
677.3	80.0209	78.3778	74.9458	73.164	71.481	-0.19449	-0.30819	-0.40264	-0.77514	68.122	-2.90509	-6.86993	-11.7296	-1.67479
679	79.9658	78.3355	74.9026	73.105	71.581	-0.19461	-0.30923	-0.40265	-0.77658	68.222	-2.90629	-6.87617	-11.7423	-1.6741
680.7	79.9078	78.2937	74.8593	73.0448	71.681	-0.19471	-0.31015	-0.40267	-0.7779	68.322	-2.9073	-6.88259	-11.7571	-1.67348
682.4	79.853	78.2516	74.8164	72.9834	71.781	-0.19483	-0.31102	-0.40268	-0.77914	68.422	-2.90851	-6.88871	-11.7738	-1.67289
684.1	79.7972	78.2121	74.7727	72.9209	71.881	-0.19495	-0.3119	-0.40271	-0.78044	68.522	-2.90952	-6.89435	-11.7905	-1.67231
685.8	79.7381	78.1732	74.7277	72.8572	71.981	-0.19507	-0.31285	-0.40274	-0.7819	68.622	-2.91018	-6.89979	-11.8054	-1.6717
687.5	79.685	78.133	74.684	72.7922	72.081	-0.19515	-0.31385	-0.40276	-0.78346	68.722	-2.9108	-6.9053	-11.8188	-1.67107
689.2	79.6307	78.0946	74.641	72.7284	72.181	-0.19521	-0.31491	-0.40278	-0.78492	68.822	-2.91179	-6.91106	-11.8322	-1.67044
690.9	79.5757	78.0575	74.5991	72.6651	72.281	-0.19527	-0.31599	-0.4028	-0.78625	68.922	-2.91305	-6.91688	-11.847	-1.66984
692.6	79.5203	78.0209	74.5562	72.6034	72.381	-0.19532	-0.31707	-0.40281	-0.78758	69.022	-2.91378	-6.92258	-11.8627	-1.66926
694.3	79.4684	77.9859	74.5149	72.5445	72.481	-0.19537	-0.31808	-0.40283	-0.78907	69.122	-2.91448	-6.92804	-11.8782	-1.66869
696	79.4162	77.951	74.475	72.4865	72.581	-0.1954	-0.31899	-0.40285	-0.79064	69.222	-2.91539	-6.93343	-11.8925	-1.66814
697.7	79.363	77.9167	74.4342	72.4298	72.681	-0.19542	-0.31983	-0.40287	-0.79217	69.322	-2.91615	-6.93894	-11.9059	-1.66762
699.4	79.311	77.8839	74.3945	72.3743	72.781	-0.19544	-0.32065	-0.40289	-0.79359	69.422	-2.91689	-6.94471	-11.919	-1.66713
701.1	79.2617	77.8508	74.3558	72.3214	72.881	-0.19544	-0.32152	-0.40291	-0.79494	69.522	-2.91769	-6.95064	-11.9322	-1.66665
702.8	79.2097	77.8174	74.3182	72.2685	72.981	-0.19543	-0.32246	-0.40293	-0.79626	69.622	-2.91839	-6.95654	-11.9457	-1.66614
704.5	79.1595	77.7854	74.2804	72.2151	73.081	-0.19542	-0.32343	-0.40295	-0.79757	69.722	-2.91917	-6.96228	-11.9598	-1.66562
706.2	79.1125	77.7535	74.2433	72.1613	73.181	-0.1954	-0.3244	-0.40297	-0.79893	69.822	-2.92012	-6.96786	-11.9746	-1.66512
707.9	79.0624	77.7221	74.2063	72.1084	73.281	-0.19538	-0.32533	-0.403	-0.80031	69.922	-2.92088	-6.9733	-11.9894	-1.66463
709.6	79.0129	77.6909	74.1695	72.0571	73.381	-0.19533	-0.32624	-0.40302	-0.80163	70.022	-2.92166	-6.9786	-12.0038	-1.66413
711.3	78.9621	77.6604	74.1338	72.0073	73.481	-0.19528	-0.32717	-0.40304	-0.80289	70.122	-2.92244	-6.98364	-12.0173	-1.66364
713	78.9128	77.6301	74.0971	71.9587	73.581	-0.19523	-0.32819	-0.40306	-0.80422	70.222	-2.92302	-6.98829	-12.0304	-1.66317
714.7	78.8607	77.6002	74.0604	71.9101	73.681	-0.19516	-0.32926	-0.40309	-0.80575	70.322	-2.92362	-6.99243	-12.0439	-1.66273
716.4	78.811	77.5707	74.0247	71.8628	73.781	-0.19511	-0.33036	-0.40311	-0.80737	70.422	-2.92438	-6.99626	-12.0581	-1.6623
718.1	78.7654	77.5419	73.9887	71.817	73.881	-0.19505	-0.33143	-0.40314	-0.80883	70.522	-2.92517	-7.00018	-12.0728	-1.66186
719.8	78.7224	77.5128	73.9538	71.7733	73.981	-0.19493	-0.33246	-0.40316	-0.81011	70.622	-2.92599	-7.00459	-12.0871	-1.66143
721.5	78.6909	77.484	73.9211	71.7295	74.081	-0.19486	-0.33346	-0.40319	-0.81136	70.722	-2.92672	-7.00983	-12.1007	-1.66103
723.2	78.6557	77.4554	73.8876	71.6852	74.181	-0.19479	-0.33446	-0.40322	-0.81269	70.822	-2.92743	-7.01566	-12.1142	-1.66067
724.9	78.6173	77.4272	73.8518	71.6428	74.281	-0.1947	-0.33544	-0.40325	-0.81407	70.922	-2.92827	-7.02146	-12.1287	-1.66033
726.6	78.5773	77.3986	73.8164	71.5999	74.381	-0.1946	-0.33641	-0.40327	-0.81544	71.022	-2.92889	-7.02668	-12.1444	-1.65997
728.3	78.5327	77.3703	73.7822	71.5575	74.481	-0.19449	-0.33736	-0.4033	-0.81678	71.122	-2.9293	-7.0315	-12.1601	-1.6596
730	78.4855	77.3421	73.7483	71.5139	74.581	-0.19438	-0.33829	-0.40334	-0.81803	71.222	-2.92974	-7.03634	-12.1746	-1.65921
731.7	78.4402	77.3146	73.7146	71.4709	74.681	-0.19429	-0.33921	-0.40337	-0.81921	71.322	-2.9305	-7.04164	-12.1875	-1.65881
733.4	78.3988	77.2874	73.6809	71.4278	74.781	-0.19419	-0.34016	-0.40341	-0.8204	71.422	-2.93127	-7.04728	-12.1988	-1.65844
735.1	78.3579	77.2607	73.6469	71.3851	74.881	-0.19409	-0.34113	-0.40345	-0.82168	71.522	-2.93179	-7.0528	-12.2089	-1.65809
736.8	78.3131	77.2355	73.6146	71.3426	74.981	-0.19398	-0.34213	-0.4035	-0.82309	71.622	-2.93223	-7.05776	-12.2186	-1.65778
738.5	78.2716	77.2108	73.5844	71.3013	75.081	-0.19387	-0.34315	-0.40354	-0.82458	71.722	-2.93271	-7.06223	-12.2298	-1.6575
740.2	78.2319	77.1867	73.5523	71.2606	75.181	-0.19379	-0.34417	-0.40358	-0.82609	71.822	-2.93327	-7.06653	-12.2445	-1.65723
741.9	78.1941	77.1643	73.5181	71.2203	75.281	-0.19369	-0.3452	-0.40362	-0.8275	71.922	-2.9339	-7.07098	-12.2637	-1.65695
743.6	78.1619	77.1429	73.4834	71.1804	75.381	-0.19356	-0.34621	-0.40366	-0.82875	72.022	-2.93446	-7.07575	-12.2835	-1.65663
745.3	78.1324	77.1221	73.4491	71.141	75.481	-0.19347	-0.34719	-0.4037	-0.8299	72.122	-2.93491	-7.08077	-12.2993	-1.65633
747	78.1036	77.1018	73.4157	71.1025	75.581	-0.19333	-0.34815	-0.40375	-0.83102	72.222	-2.9353	-7.08596	-12.3114	-1.65605
748.7	78.0734	77.0819	73.3817	71.0646	75.681	-0.19322	-0.34907	-0.4038	-0.83216	72.322	-2.93574	-7.09119	-12.3224	-1.6558
750.4	78.0385	77.0616	73.3479	71.0266	75.781	-0.19315	-0.34995	-0.40385	-0.83338	72.422	-2.93626	-7.09624	-12.3342	-1.65555
752.1	78.0026	77.0416	73.3165	70.989	75.881	-0.19307	-0.35079	-0.4039	-0.8347	72.522	-2.93669	-7.10087	-12.3471	-1.65527
753.8	77.9601	77.0219	73.2866	70.9528	75.981	-0.19299	-0.35162	-0.40396	-0.83603	72.622	-2.93702	-7.10503	-12.3602	-1.655
755.5	77.9216	77.0018	73.2573	70.9165	76.081	-0.19292	-0.35247	-0.40403	-0.83727	72.722	-2.93749	-7.10893	-12.3729	-1.65475
757.2	77.8828	76.9827	73.2283	70.8796	76.181	-0.19284	-0.35336	-0.40409	-0.83845	72.822	-2.93799	-7.11285	-12.3856	-1.65452
758.9	77.8503	76.9625	73.2008	70.8424	76.281	-0.19277	-0.35428	-0.40415	-0.83967	72.922	-2.93846	-7.11704	-12.3986	-1.65431
760.6	77.821	76.9415	73.1767	70.8064	76.381	-0.1927	-0.35525	-0.40421	-0.84098	73.022	-2.93882	-7.12149	-12.4126	-1.65411
762.3	77.7932	76.921	73.153	70.7711	76.481	-0.19266	-0.35625	-0.40428	-0.8423	73.122	-2.93904	-7.12601	-12.4272	-1.65391
764	77.7652	76.9001	73.1286	70.7374	76.581	-0.19261	-0.35728	-0.40435	-0.84357	73.222	-2.93926	-7.13039	-12.4414	-1.65371
765.7	77.738	76.8791	73.104	70.7056	76.681	-0.19255	-0.35834	-0.40443	-0.84482	73.322	-2.93958	-7.13458	-12.4548	-1.65352
767.4	77.7099	76.8578	73.0799	70.675	76.781	-0.19252	-0.35941	-0.40452	-0.84606	73.422	-2.93997	-7.13876	-12.4676	-1.65335
769.1	77.679	76.8371	73.0562	70.6462	76.881	-0.19249	-0.36045	-0.4046	-0.84729	73.522	-2.94029	-7.14313	-12.4803	-1.65318
770.8	77.6513	76.816	73.0319	70.6178	76.981	-0.19245	-0.3614	-0.40468	-0.84844	73.622	-2.94059	-7.14784	-12.4933	-1.65301
772.5	77.6243	76.796	73.0087	70.5887	77.081	-0.19243	-0.36226	-0.40476	-0.84949	73.722	-2.94087	-7.15274	-12.5064	-1.65282
774.2	77.5976	76.7758	72.9861	70.56	77.181	-0.19242	-0.36307	-0.40484	-0.85053	73.822	-2.94105	-7.15761	-12.5195	-1.65264
775.9	77.5701	76.7566	72.9626	70.5309	77.281	-0.19241	-0.3639	-0.40491	-0.85168	73.922	-2.94134	-7.16228	-12.5323	-1.65249
777.6	77.5433	76.7382	72.9385	70.501	77.381	-0.1924	-0.36481	-0.405	-0.85293	74.022	-2.94166	-7.16677	-12.5449	-1.65236
779.3	77.5156	76.7205	72.9139	70.4705	77.481	-0.1924	-0.36578	-0.4051	-0.85414	74.122	-2.94181	-7.17116	-12.5571	-1.65224
781	77.4898	76.704	72.8887	70.4392	77.581	-0.1924	-0.36676	-0.40522	-0.85521	74.222	-2.94201	-7.17549	-12.5691	-1.65211
782.7	77.4664	76.6887	72.8641	70.4066	77.681	-0.19241	-0.36769	-0.40534	-0.85625	74.322	-2.94221	-7.17976	-12.5811	-1.65199
784.4	77.4448	76.6753	72.8391	70.3742	77.781	-0.19242	-0.36857	-0.40547	-0.85737	74.422	-2.94239	-7.18393	-12.5931	-1.65187
786.1	77.4249	76.6625	72.8138	70.3413	77.881	-0.19245	-0.36941	-0.4056	-0.85863	74.522	-2.94259	-7.18798	-12.6053	-1.65177
787.8	77.4062	76.6507	72.7887	70.3088	77.981	-0.19247	-0.37025	-0.40572	-0.85998	74.622	-2.94274	-7.19197	-12.618	-1.65168
789.5	77.3892	76.6398	72.764	70.2762	78.081	-0.19249	-0.37108	-0.40584	-0.86137	74.722	-2.94287	-7.19596	-12.6313	-1.6516
791.2	77.3726	76.6294	72.7389	70.2439	78.181	-0.19252	-0.37192	-0.40597	-0.86264	74.822	-2.943	-7.20004	-12.6452	-1.65152
792.9	77.3559	76.6192	72.7142	70.2126	78.281	-0.19256	-0.37276	-0.4061	-0.86372	74.922	-2.9431	-7.20423	-12.6589	-1.65144
794.6	77.3423	76.6091	72.6902	70.1822	78.381	-0.19259	-0.37361	-0.40625	-0.86474	75.022	-2.94321	-7.2085	-12.6718	-1.65137
796.3	77.3296	76.5988	72.6667	70.1514	78.481	-0.19261	-0.37447	-0.4064	-0.86584	75.122	-2.9433	-7.21281	-12.6837	-1.65129
798	77.3157	76.5881	72.6437	70.1211	78.581	-0.19265	-0.37534	-0.40656	-0.86703	75.222	-2.94336	-7.21711	-12.6951	-1.65123
799.7	77.2987	76.5768	72.6216	70.0901	78.681	-0.19268	-0.37621	-0.4067	-0.86821	75.322	-2.94343	-7.22137	-12.7063	-1.65118
801.4	77.2789	76.5654	72.6001	70.0594	78.781	-0.19271	-0.37708	-0.40684	-0.86932	75.422	-2.94349	-7.22555	-12.7175	-1.65114
803.1	77.2557	76.5533	72.5796	70.0282	78.881	-0.19273	-0.37792	-0.40697	-0.87038	75.522	-2.94353	-7.2296	-12.7287	-1.65111
804.8	77.231	76.5411	72.5595	69.9953	78.981	-0.19275	-0.37872	-0.4071	-0.87143	75.622	-2.94356	-7.23351	-12.7399	-1.65108
806.5	77.2073	76.5287	72.5402	69.964	79.081	-0.19276	-0.37949	-0.40724	-0.87247	75.722	-2.94357	-7.23722	-12.7513	-1.65105
808.2	77.1877	76.5153	72.5225	69.9333	79.181	-0.19278	-0.38026	-0.4074	-0.87347	75.822	-2.94356	-7.24075	-12.763	-1.65103
809.9	77.1745	76.502	72.5062	69.9032	79.281	-0.19278	-0.38103	-0.40759	-0.87444	75.922	-2.94355	-7.24417	-12.7753	-1.65102
811.6	77.1667	76.4889	72.4906	69.8729	79.381	-0.19277	-0.38181	-0.4078	-0.87546	76.022	-2.94352	-7.24759	-12.788	-1.65101
813.3	77.1628	76.4754	72.4759	69.8439	79.481	-0.19276	-0.38261	-0.40801	-0.87661	76.122	-2.94348	-7.25111	-12.8005	-1.65101
815	77.1602	76.4621	72.4632	69.8149	79.581	-0.19274	-0.38343	-0.4082	-0.87784	76.222	-2.94343	-7.25478	-12.8122	-1.65102
816.7	77.156	76.4493	72.4524	69.7857	79.681	-0.1927	-0.38426	-0.40839	-0.87895	76.322	-2.94336	-7.2586	-12.8229	-1.65103
818.4	77.1489	76.4376	72.4422	69.755	79.781	-0.19266	-0.38506	-0.40859	-0.87989	76.422	-2.94329	-7.26256	-12.8333	-1.65104
820.1	77.138	76.4265	72.4319	69.723	79.881	-0.19264	-0.38584	-0.4088	-0.8808	76.522	-2.94323	-7.26665	-12.8445	-1.65107
821.8	77.1253	76.4167	72.4225	69.6904	79.981	-0.19256	-0.38658	-0.40903	-0.88176	76.622	-2.94312	-7.27085	-12.8568	-1.65109
823.5	77.114	76.4081	72.4141	69.6565	80.081	-0.19246	-0.38732	-0.40924	-0.8828	76.722	-2.94299	-7.27512	-12.8696	-1.65113
825.2	77.1033	76.4013	72.406	69.6216	80.181	-0.19238	-0.38807	-0.40944	-0.88392	76.822	-2.9429	-7.27936	-12.8822	-1.65117
826.9	77.094	76.3953	72.3982	69.5871	80.281	-0.19226	-0.38882	-0.40964	-0.88504	76.922	-2.94275	-7.28339	-12.894	-1.65121
828.6	77.0854	76.3903	72.3905	69.553	80.381	-0.19212	-0.38957	-0.40984	-0.8861	77.022	-2.94258	-7.28702	-12.905	-1.65125
830.3	77.0771	76.3864	72.3827	69.5202	80.481	-0.19196	-0.39027	-0.41006	-0.88702	77.122	-2.94246	-7.29031	-12.9152	-1.6513
832	77.0695	76.383	72.3756	69.4891	80.581	-0.19178	-0.39093	-0.4103	-0.88792	77.222	-2.94237	-7.29352	-12.9247	-1.65135
833.7	77.0601	76.3797	72.3685	69.4581	80.681	-0.19161	-0.39159	-0.41054	-0.88889	77.322	-2.94215	-7.29691	-12.9343	-1.65142
835.4	77.0511	76.3765	72.3614	69.4273	80.781	-0.19143	-0.39228	-0.41078	-0.88994	77.422	-2.94191	-7.30063	-12.945	-1.65149
837.1	77.0441	76.3732	72.355	69.3963	80.881	-0.19121	-0.393	-0.41102	-0.89095	77.522	-2.94176	-7.3045	-12.9572	-1.65156
838.8	77.036	76.3699	72.3485	69.3651	80.981	-0.19098	-0.39372	-0.41129	-0.89186	77.622	-2.94152	-7.30829	-12.9706	-1.65163
840.5	77.0293	76.3667	72.3422	69.3342	81.081	-0.19079	-0.39441	-0.4116	-0.89276	77.722	-2.94135	-7.31185	-12.9842	-1.6517
842.2	77.022	76.3635	72.3364	69.3043	81.181	-0.19052	-0.39504	-0.41193	-0.89379	77.822	-2.94111	-7.31524	-12.9971	-1.65179
843.9	77.0149	76.3607	72.3313	69.2738	81.281	-0.19007	-0.39565	-0.41225	-0.89489	77.922	-2.94078	-7.31853	-13.0093	-1.65189
845.6	77.0059	76.3581	72.327	69.2446	81.381	-0.18966	-0.39626	-0.41253	-0.89586	78.022	-2.94059	-7.32179	-13.0207	-1.652
847.3	76.9983	76.3558	72.323	69.217	81.481	-0.18933	-0.39688	-0.41279	-0.89665	78.122	-2.94041	-7.32506	-13.0316	-1.65212
849	76.9929	76.354	72.3198	69.1905	81.581	-0.18886	-0.39751	-0.41307	-0.8974	78.222	-2.94009	-7.32833	-13.0426	-1.65223
850.7	76.9907	76.3523	72.3172	69.1656	81.681	-0.18808	-0.39813	-0.41339	-0.89828	78.322	-2.93973	-7.33163	-13.0543	-1.65233
852.4	76.9914	76.3508	72.3152	69.1408	81.781	-0.18758	-0.39873	-0.41373	-0.89928	78.422	-2.93952	-7.33497	-13.0665	-1.65243
854.1	76.9944	76.3495	72.3138	69.1173	81.881	-0.18706	-0.39932	-0.41406	-0.90023	78.522	-2.93919	-7.33834	-13.0787	-1.65255
855.8	76.9998	76.3478	72.3134	69.0945	81.981	-0.18659	-0.39988	-0.41436	-0.90104	78.622	-2.93884	-7.34175	-13.09	-1.65268
857.5	77.0055	76.3459	72.3138	69.0722	82.081	-0.18637	-0.40042	-0.41463	-0.9018	78.722	-2.93853	-7.34516	-13.1003	-1.6528
859.2	77.0103	76.3435	72.3148	69.0502	82.181	-0.18541	-0.40095	-0.41493	-0.90259	78.822	-2.93823	-7.34851	-13.1099	-1.65293
860.9	77.0124	76.3408	72.3161	69.028	82.281	-0.18456	-0.40148	-0.41528	-0.90344	78.922	-2.93794	-7.35172	-13.1189	-1.65305
862.6	77.0113	76.3374	72.3178	69.0065	82.381	-0.18411	-0.40201	-0.41568	-0.9043	79.022	-2.93764	-7.3548	-13.1279	-1.65318
864.3	77.0085	76.3337	72.3196	68.9862	82.481	-0.18355	-0.40254	-0.4161	-0.90512	79.122	-2.93728	-7.3578	-13.1374	-1.65331
866	77.0034	76.3295	72.3213	68.9663	82.581	-0.18306	-0.40307	-0.41651	-0.90594	79.222	-2.93689	-7.36079	-13.1481	-1.65344
867.7	76.9964	76.3256	72.3231	68.9462	82.681	-0.18248	-0.40358	-0.41691	-0.90687	79.322	-2.93656	-7.36383	-13.1604	-1.65357
869.4	76.9882	76.3214	72.3234	68.9265	82.781	-0.18163	-0.40406	-0.41733	-0.90788	79.422	-2.93623	-7.36692	-13.173	-1.65371
871.1	76.978	76.3173	72.3215	68.9074	82.881	-0.18087	-0.40451	-0.41778	-0.9088	79.522	-2.93587	-7.37008	-13.1848	-1.65388
872.8	76.9667	76.3139	72.3203	68.889	82.981	-0.18023	-0.40493	-0.41824	-0.90956	79.622	-2.9355	-7.37332	-13.1954	-1.65406
874.5	76.9574	76.3111	72.3187	68.8716	83.081	-0.17958	-0.40533	-0.41866	-0.91027	79.722	-2.93508	-7.37654	-13.2056	-1.65421
876.2	76.9528	76.3084	72.3164	68.8549	83.181	-0.17885	-0.40571	-0.41904	-0.91108	79.822	-2.9348	-7.37968	-13.2162	-1.65434
877.9	76.9524	76.3061	72.3138	68.839	83.281	-0.17809	-0.40612	-0.41939	-0.91199	79.922	-2.93456	-7.38267	-13.2273	-1.65449
879.6	76.9546	76.3044	72.3111	68.8238	83.381	-0.17739	-0.40655	-0.41974	-0.91287	80.022	-2.93405	-7.38559	-13.2383	-1.65464
881.3	76.9574	76.3032	72.309	68.809	83.481	-0.17675	-0.40701	-0.4201	-0.91366	80.122	-2.93364	-7.38852	-13.2485	-1.65481
883	76.9603	76.3029	72.3078	68.7945	83.581	-0.17563	-0.40748	-0.4205	-0.91441	80.222	-2.9333	-7.39152	-13.2578	-1.655
884.7	76.9628	76.3031	72.3074	68.7806	83.681	-0.17427	-0.40792	-0.42093	-0.91515	80.322	-2.93285	-7.39451	-13.2669	-1.65518
886.4	76.9649	76.3042	72.3083	68.7679	83.781	-0.17308	-0.40832	-0.42142	-0.91591	80.422	-2.93245	-7.39741	-13.2761	-1.65535
888.1	76.9665	76.3058	72.3107	68.7551	83.881	-0.17187	-0.40872	-0.42192	-0.91666	80.522	-2.93201	-7.40015	-13.2859	-1.65551
889.8	76.9678	76.3081	72.3144	68.7426	83.981	-0.17119	-0.40916	-0.42239	-0.91739	80.622	-2.93159	-7.40279	-13.296	-1.65567
891.5	76.9681	76.3109	72.3192	68.7301	84.081	-0.17063	-0.40964	-0.42279	-0.9181	80.722	-2.93124	-7.40548	-13.306	-1.65585
893.2	76.9663	76.3141	72.3248	68.7182	84.181	-0.1699	-0.41008	-0.42316	-0.91877	80.822	-2.93087	-7.40832	-13.3158	-1.65604
894.9	76.9623	76.3175	72.3311	68.7078	84.281	-0.16887	-0.41042	-0.42355	-0.91942	80.922	-2.93047	-7.41126	-13.3258	-1.65622
896.6	76.9586	76.321	72.3377	68.6974	84.381	-0.16766	-0.41069	-0.42399	-0.92007	81.022	-2.93011	-7.41416	-13.3366	-1.65638
898.3	76.9573	76.3246	72.3445	68.6865	84.481	-0.16657	-0.41093	-0.4245	-0.92073	81.122	-2.9298	-7.41687	-13.3485	-1.65656
--	--	--	--	--	84.581	-0.16555	-0.41122	-0.42503	-0.92142	81.222	-2.92931	-7.41942	-13.3606	-1.65677
--	--	--	--	--	84.681	-0.16435	-0.41157	-0.42554	-0.92213	81.322	-2.92872	-7.42191	-13.3714	-1.65698
--	--	--	--	--	84.781	-0.16334	-0.41195	-0.42602	-0.92285	81.422	-2.92829	-7.42444	-13.3807	-1.65715
--	--	--	--	--	84.881	-0.16228	-0.41228	-0.42649	-0.92358	81.522	-2.9279	-7.42705	-13.3895	-1.6573
--	--	--	--	--	84.981	-0.16111	-0.41253	-0.42699	-0.92429	81.622	-2.92728	-7.42968	-13.399	-1.65746
--	--	--	--	--	85.081	-0.16007	-0.41275	-0.42753	-0.92496	81.722	-2.92657	-7.43228	-13.4096	-1.65766
--	--	--	--	--	85.181	-0.15867	-0.41296	-0.42808	-0.9256	81.822	-2.92621	-7.43481	-13.4204	-1.65787
--	--	--	--	--	85.281	-0.15764	-0.41321	-0.42864	-0.92622	81.922	-2.92573	-7.43726	-13.4302	-1.65805
--	--	--	--	--	85.381	-0.15681	-0.41348	-0.42918	-0.92685	82.022	-2.92548	-7.43964	-13.4388	-1.65822
--	--	--	--	--	85.481	-0.15568	-0.41375	-0.42971	-0.9275	82.122	-2.92517	-7.44195	-13.4469	-1.65838
--	--	--	--	--	85.581	-0.1545	-0.41398	-0.43024	-0.92815	82.222	-2.92433	-7.44423	-13.4559	-1.65855
--	--	--	--	--	85.681	-0.15292	-0.41418	-0.43077	-0.92875	82.322	-2.92395	-7.44654	-13.4664	-1.65874
--	--	--	--	--	85.781	-0.15189	-0.41436	-0.43131	-0.92932	82.422	-2.92363	-7.4489	-13.4778	-1.65893
--	--	--	--	--	85.881	-0.15134	-0.41453	-0.43189	-0.92988	82.522	-2.92328	-7.45127	-13.4891	-1.6591
--	--	--	--	--	85.981	-0.15056	-0.41469	-0.4325	-0.93045	82.622	-2.92299	-7.45361	-13.4996	-1.65929
--	--	--	--	--	86.081	-0.14956	-0.41485	-0.43313	-0.93101	82.722	-2.92257	-7.45585	-13.5099	-1.65951
--	--	--	--	--	86.181	-0.14847	-0.41502	-0.43373	-0.93154	82.822	-2.92208	-7.45798	-13.5208	-1.65974
--	--	--	--	--	86.281	-0.14737	-0.41519	-0.43428	-0.93207	82.922	-2.92171	-7.45999	-13.532	-1.65993
--	--	--	--	--	86.381	-0.14644	-0.41535	-0.43482	-0.93266	83.022	-2.92137	-7.46189	-13.5427	-1.66009
--	--	--	--	--	86.481	-0.14561	-0.41549	-0.43536	-0.93331	83.122	-2.92102	-7.46371	-13.5521	-1.66026
--	--	--	--	--	86.581	-0.14476	-0.41561	-0.43593	-0.93393	83.222	-2.92064	-7.46556	-13.5604	-1.66046
--	--	--	--	--	86.681	-0.14385	-0.41571	-0.43653	-0.93441	83.322	-2.92027	-7.46752	-13.5683	-1.66067
--	--	--	--	--	86.781	-0.14291	-0.4158	-0.43716	-0.93483	83.422	-2.91996	-7.4697	-13.5761	-1.66087
--	--	--	--	--	86.881	-0.14183	-0.41589	-0.43781	-0.93532	83.522	-2.91961	-7.47199	-13.5844	-1.66105
--	--	--	--	--	86.981	-0.14049	-0.41596	-0.43848	-0.9359	83.622	-2.91898	-7.47424	-13.5932	-1.66123
--	--	--	--	--	87.081	-0.13941	-0.41603	-0.43914	-0.93647	83.722	-2.91846	-7.47633	-13.6028	-1.6614
--	--	--	--	--	87.181	-0.13871	-0.41609	-0.43978	-0.93696	83.822	-2.91791	-7.47834	-13.613	-1.66158
--	--	--	--	--	87.281	-0.13802	-0.41615	-0.44044	-0.93738	83.922	-2.9175	-7.48049	-13.623	-1.66176
--	--	--	--	--	87.381	-0.13712	-0.41618	-0.44113	-0.9378	84.022	-2.91726	-7.48292	-13.6319	-1.66193
--	--	--	--	--	87.481	-0.13621	-0.41621	-0.44187	-0.93824	84.122	-2.91702	-7.48544	-13.6395	-1.66209
--	--	--	--	--	87.581	-0.13552	-0.41623	-0.44262	-0.93869	84.222	-2.91668	-7.48761	-13.6466	-1.66225
--	--	--	--	--	87.681	-0.13493	-0.41624	-0.44333	-0.93913	84.322	-2.91623	-7.48927	-13.6542	-1.6624
--	--	--	--	--	87.781	-0.13425	-0.41623	-0.44397	-0.93956	84.422	-2.91577	-7.49067	-13.663	-1.66256
--	--	--	--	--	87.881	-0.13342	-0.41622	-0.44458	-0.93997	84.522	-2.91538	-7.49214	-13.6727	-1.66272
--	--	--	--	--	87.981	-0.13258	-0.4162	-0.4452	-0.94036	84.622	-2.91497	-7.49399	-13.6823	-1.66288
--	--	--	--	--	88.081	-0.13182	-0.41616	-0.44585	-0.94075	84.722	-2.91453	-7.49622	-13.6912	-1.66305
--	--	--	--	--	88.181	-0.13107	-0.41611	-0.44652	-0.94116	84.822	-2.91418	-7.49843	-13.6994	-1.66323
--	--	--	--	--	88.281	-0.13034	-0.41606	-0.44721	-0.94157	84.922	-2.91375	-7.50024	-13.7076	-1.66339
--	--	--	--	--	88.381	-0.12974	-0.41601	-0.44789	-0.94197	85.022	-2.91336	-7.50171	-13.7163	-1.66356
--	--	--	--	--	88.481	-0.12912	-0.41594	-0.44857	-0.94236	85.122	-2.91293	-7.50309	-13.7255	-1.66371
--	--	--	--	--	88.581	-0.12844	-0.41587	-0.44922	-0.94272	85.222	-2.91244	-7.50463	-13.7346	-1.66386
--	--	--	--	--	88.681	-0.12789	-0.41578	-0.44985	-0.94307	85.322	-2.91213	-7.50643	-13.7435	-1.664
--	--	--	--	--	88.781	-0.1273	-0.41568	-0.45047	-0.9434	85.422	-2.91178	-7.50835	-13.7521	-1.66414
--	--	--	--	--	88.881	-0.12672	-0.41558	-0.45112	-0.9437	85.522	-2.91137	-7.51018	-13.7604	-1.66429
--	--	--	--	--	88.981	-0.12626	-0.41546	-0.45184	-0.94399	85.622	-2.91088	-7.51182	-13.7686	-1.66443
--	--	--	--	--	89.081	-0.12586	-0.41535	-0.45261	-0.94427	85.722	-2.91033	-7.51333	-13.7767	-1.66456
--	--	--	--	--	89.181	-0.12535	-0.41522	-0.45338	-0.94457	85.822	-2.91006	-7.51474	-13.7851	-1.66469
--	--	--	--	--	89.281	-0.12491	-0.41508	-0.45408	-0.94488	85.922	-2.90984	-7.51611	-13.7939	-1.66481
--	--	--	--	--	89.381	-0.1246	-0.41493	-0.45474	-0.9452	86.022	-2.9095	-7.5175	-13.803	-1.66493
--	--	--	--	--	89.481	-0.12423	-0.41476	-0.45542	-0.94551	86.122	-2.90911	-7.519	-13.812	-1.66505
--	--	--	--	--	89.581	-0.12388	-0.41456	-0.45617	-0.9458	86.222	-2.90868	-7.52065	-13.8202	-1.66516
--	--	--	--	--	89.681	-0.12355	-0.41437	-0.457	-0.94606	86.322	-2.90828	-7.52238	-13.8279	-1.66527
--	--	--	--	--	89.781	-0.12315	-0.4142	-0.45785	-0.9463	86.422	-2.90794	-7.52404	-13.8354	-1.66539
--	--	--	--	--	89.881	-0.12279	-0.41405	-0.45867	-0.94651	86.522	-2.9076	-7.52554	-13.8429	-1.66552
--	--	--	--	--	89.981	-0.1225	-0.4139	-0.45945	-0.94672	86.622	-2.90724	-7.52691	-13.8508	-1.66563
--	--	--	--	--	90.081	-0.12222	-0.41373	-0.46016	-0.94691	86.722	-2.90686	-7.52822	-13.859	-1.66571
--	--	--	--	--	90.181	-0.12191	-0.41349	-0.4608	-0.94712	86.822	-2.90646	-7.52952	-13.8675	-1.66579
--	--	--	--	--	90.281	-0.12172	-0.41322	-0.46141	-0.94732	86.922	-2.90593	-7.53083	-13.8761	-1.66588
--	--	--	--	--	90.381	-0.12154	-0.41294	-0.46202	-0.94752	87.022	-2.90535	-7.53215	-13.8846	-1.66598
--	--	--	--	--	90.481	-0.12133	-0.41271	-0.46265	-0.94772	87.122	-2.90494	-7.53349	-13.893	-1.66606
--	--	--	--	--	90.581	-0.12112	-0.41249	-0.46334	-0.94792	87.222	-2.90463	-7.53485	-13.9011	-1.66613
--	--	--	--	--	90.681	-0.12091	-0.41226	-0.46406	-0.9481	87.322	-2.90425	-7.5362	-13.9094	-1.66619
--	--	--	--	--	90.781	-0.12075	-0.412	-0.46484	-0.94827	87.422	-2.90379	-7.53753	-13.9181	-1.66625
--	--	--	--	--	90.881	-0.12063	-0.41172	-0.46564	-0.94844	87.522	-2.90336	-7.53882	-13.9272	-1.66631
--	--	--	--	--	90.981	-0.12048	-0.41144	-0.46646	-0.94859	87.622	-2.90303	-7.54002	-13.9361	-1.66636
--	--	--	--	--	91.081	-0.12029	-0.41118	-0.46726	-0.94873	87.722	-2.9027	-7.54111	-13.9442	-1.66641
--	--	--	--	--	91.181	-0.12022	-0.41093	-0.46804	-0.94886	87.822	-2.90228	-7.54215	-13.9515	-1.66645
--	--	--	--	--	91.281	-0.12014	-0.41067	-0.46878	-0.94898	87.922	-2.90178	-7.54323	-13.9586	-1.66649
--	--	--	--	--	91.381	-0.12003	-0.41038	-0.46949	-0.9491	88.022	-2.90128	-7.54439	-13.9658	-1.66652
--	--	--	--	--	91.481	-0.11998	-0.41006	-0.47017	-0.94922	88.122	-2.90081	-7.54562	-13.9733	-1.66655
--	--	--	--	--	91.581	-0.11995	-0.40972	-0.47084	-0.94933	88.222	-2.9003	-7.54679	-13.981	-1.66657
--	--	--	--	--	91.681	-0.11991	-0.40935	-0.47153	-0.94942	88.322	-2.89983	-7.54782	-13.9887	-1.66659
--	--	--	--	--	91.781	-0.11987	-0.40898	-0.47225	-0.94951	88.422	-2.89941	-7.54875	-13.9963	-1.66659
--	--	--	--	--	91.881	-0.11985	-0.40862	-0.473	-0.94958	88.522	-2.89888	-7.54965	-14.0036	-1.6666
--	--	--	--	--	91.981	-0.11984	-0.40828	-0.47378	-0.94966	88.622	-2.89838	-7.55059	-14.0106	-1.66659
--	--	--	--	--	92.081	-0.11985	-0.40795	-0.47457	-0.94972	88.722	-2.89792	-7.55157	-14.0173	-1.66658
--	--	--	--	--	92.181	-0.11986	-0.40762	-0.4753	-0.94977	88.822	-2.89737	-7.55255	-14.024	-1.66657
--	--	--	--	--	92.281	-0.11987	-0.40726	-0.47593	-0.94981	88.922	-2.89686	-7.55347	-14.0312	-1.66655
--	--	--	--	--	92.381	-0.11989	-0.40688	-0.47648	-0.94984	89.022	-2.89645	-7.55434	-14.0391	-1.66652
--	--	--	--	--	92.481	-0.11992	-0.40649	-0.47705	-0.94987	89.122	-2.89598	-7.55518	-14.0472	-1.66649
--	--	--	--	--	92.581	-0.11996	-0.40609	-0.47773	-0.9499	89.222	-2.89539	-7.55601	-14.0549	-1.66645
--	--	--	--	--	92.681	-0.12001	-0.40569	-0.47858	-0.94991	89.322	-2.89497	-7.55685	-14.0618	-1.6664
--	--	--	--	--	92.781	-0.12005	-0.40529	-0.47948	-0.94992	89.422	-2.89455	-7.5577	-14.0686	-1.66634
--	--	--	--	--	92.881	-0.12012	-0.4049	-0.4803	-0.94992	89.522	-2.89405	-7.55859	-14.0756	-1.66627
--	--	--	--	--	92.981	-0.12016	-0.40452	-0.481	-0.94991	89.622	-2.8936	-7.55947	-14.0836	-1.6662
--	--	--	--	--	93.081	-0.12019	-0.40418	-0.48164	-0.9499	89.722	-2.89306	-7.56027	-14.092	-1.66613
--	--	--	--	--	93.181	-0.1203	-0.40387	-0.48228	-0.94988	89.822	-2.89241	-7.56093	-14.1003	-1.66605
--	--	--	--	--	93.281	-0.12038	-0.40357	-0.48295	-0.94985	89.922	-2.89182	-7.56148	-14.1082	-1.66598
--	--	--	--	--	93.381	-0.12044	-0.40326	-0.48365	-0.94981	90.022	-2.89132	-7.56201	-14.1154	-1.6659
--	--	--	--	--	93.481	-0.12054	-0.40289	-0.4844	-0.94976	90.122	-2.89068	-7.56263	-14.122	-1.66581
--	--	--	--	--	93.581	-0.12061	-0.40245	-0.48518	-0.94971	90.222	-2.8901	-7.5634	-14.1281	-1.66571
--	--	--	--	--	93.681	-0.12068	-0.40196	-0.48594	-0.94966	90.322	-2.88969	-7.5642	-14.1338	-1.6656
--	--	--	--	--	93.781	-0.12077	-0.40151	-0.48664	-0.9496	90.422	-2.88918	-7.56491	-14.1397	-1.66547
--	--	--	--	--	93.881	-0.12086	-0.4011	-0.48731	-0.94953	90.522	-2.88857	-7.56549	-14.1458	-1.66534
--	--	--	--	--	93.981	-0.12093	-0.40072	-0.48798	-0.94944	90.622	-2.8879	-7.56599	-14.1524	-1.6652
--	--	--	--	--	94.081	-0.12103	-0.40032	-0.48868	-0.94935	90.722	-2.88721	-7.5665	-14.1594	-1.66505
--	--	--	--	--	94.181	-0.1211	-0.39988	-0.48939	-0.94925	90.822	-2.88669	-7.56704	-14.1667	-1.66489
--	--	--	--	--	94.281	-0.12116	-0.39941	-0.49008	-0.94916	90.922	-2.88617	-7.5676	-14.1742	-1.66473
--	--	--	--	--	94.381	-0.12122	-0.39892	-0.49072	-0.94905	91.022	-2.88529	-7.56811	-14.1817	-1.66457
--	--	--	--	--	94.481	-0.12129	-0.39845	-0.49131	-0.94892	91.122	-2.88445	-7.56855	-14.189	-1.6644
--	--	--	--	--	94.581	-0.12136	-0.39799	-0.49187	-0.94879	91.222	-2.88408	-7.56897	-14.1959	-1.66423
--	--	--	--	--	94.681	-0.12143	-0.39756	-0.49243	-0.94865	91.322	-2.88316	-7.56938	-14.2025	-1.66405
--	--	--	--	--	94.781	-0.12149	-0.39716	-0.49298	-0.94852	91.422	-2.88241	-7.5698	-14.2087	-1.66384
--	--	--	--	--	94.881	-0.12153	-0.39674	-0.49352	-0.94838	91.522	-2.88194	-7.57025	-14.2148	-1.66362
--	--	--	--	--	94.981	-0.12158	-0.39626	-0.49406	-0.94823	91.622	-2.88137	-7.57069	-14.2208	-1.66339
--	--	--	--	--	95.081	-0.12163	-0.39569	-0.4946	-0.94807	91.722	-2.88062	-7.57112	-14.2271	-1.66317
--	--	--	--	--	95.181	-0.12166	-0.39508	-0.49516	-0.9479	91.822	-2.87978	-7.57152	-14.2335	-1.66294
--	--	--	--	--	95.281	-0.1217	-0.39454	-0.49577	-0.94773	91.922	-2.87904	-7.57188	-14.2402	-1.6627
--	--	--	--	--	95.381	-0.12173	-0.39408	-0.49643	-0.94755	92.022	-2.87829	-7.57219	-14.2472	-1.66245
--	--	--	--	--	95.481	-0.12175	-0.39366	-0.49711	-0.94737	92.122	-2.87742	-7.57247	-14.2539	-1.6622
--	--	--	--	--	95.581	-0.12177	-0.39322	-0.49775	-0.94718	92.222	-2.87677	-7.57274	-14.26	-1.66196
--	--	--	--	--	95.681	-0.12178	-0.39271	-0.49833	-0.947	92.322	-2.87627	-7.573	-14.2651	-1.66171
--	--	--	--	--	95.781	-0.12178	-0.39217	-0.49888	-0.9468	92.422	-2.87571	-7.57327	-14.2699	-1.66146
--	--	--	--	--	95.881	-0.12177	-0.39166	-0.49941	-0.94659	92.522	-2.87491	-7.57351	-14.2751	-1.66119
--	--	--	--	--	95.981	-0.12175	-0.3912	-0.49994	-0.94636	92.622	-2.87406	-7.57374	-14.2816	-1.66091
--	--	--	--	--	96.081	-0.12173	-0.39076	-0.5005	-0.94611	92.722	-2.8733	-7.57394	-14.2892	-1.66062
--	--	--	--	--	96.181	-0.12171	-0.39032	-0.50108	-0.94587	92.822	-2.87251	-7.57411	-14.2968	-1.6603
--	--	--	--	--	96.281	-0.12168	-0.38985	-0.50168	-0.94563	92.922	-2.87166	-7.57427	-14.3034	-1.65995
--	--	--	--	--	96.381	-0.12163	-0.38933	-0.50229	-0.94538	93.022	-2.87124	-7.57439	-14.3092	-1.65958
--	--	--	--	--	96.481	-0.12157	-0.38878	-0.50286	-0.94511	93.122	-2.87055	-7.5745	-14.3146	-1.65925
--	--	--	--	--	96.581	-0.12151	-0.38819	-0.50338	-0.94483	93.222	-2.8692	-7.57459	-14.3201	-1.65894
--	--	--	--	--	96.681	-0.12143	-0.38761	-0.50388	-0.94455	93.322	-2.8686	-7.57467	-14.3259	-1.65863
--	--	--	--	--	96.781	-0.12135	-0.38707	-0.50436	-0.94429	93.422	-2.86766	-7.57473	-14.332	-1.65826
--	--	--	--	--	96.881	-0.12128	-0.38659	-0.50486	-0.94404	93.522	-2.86668	-7.57479	-14.3385	-1.65786
--	--	--	--	--	96.981	-0.12117	-0.38611	-0.50538	-0.94379	93.622	-2.86596	-7.57485	-14.3451	-1.65748
--	--	--	--	--	97.081	-0.12104	-0.38561	-0.50592	-0.94353	93.722	-2.86517	-7.57489	-14.3514	-1.65713
--	--	--	--	--	97.181	-0.12092	-0.38503	-0.50649	-0.94325	93.822	-2.86414	-7.57492	-14.3572	-1.65678
--	--	--	--	--	97.281	-0.12083	-0.38443	-0.50704	-0.94295	93.922	-2.86334	-7.57493	-14.3628	-1.65639
--	--	--	--	--	97.381	-0.12066	-0.38385	-0.50751	-0.94263	94.022	-2.86235	-7.57491	-14.3686	-1.65595
--	--	--	--	--	97.481	-0.12054	-0.38329	-0.50794	-0.9423	94.122	-2.86136	-7.57488	-14.3746	-1.65551
--	--	--	--	--	97.581	-0.12044	-0.38276	-0.50835	-0.94197	94.222	-2.86065	-7.57484	-14.3806	-1.6551
--	--	--	--	--	97.681	-0.12023	-0.38224	-0.50877	-0.94164	94.322	-2.8599	-7.57478	-14.3862	-1.65469
--	--	--	--	--	97.781	-0.12007	-0.38172	-0.50922	-0.94132	94.422	-2.85909	-7.5747	-14.3914	-1.65423
--	--	--	--	--	97.881	-0.11993	-0.38119	-0.50967	-0.94098	94.522	-2.85825	-7.5746	-14.3963	-1.65373
--	--	--	--	--	97.981	-0.11972	-0.38065	-0.51012	-0.94061	94.622	-2.8573	-7.5745	-14.4011	-1.65323
--	--	--	--	--	98.081	-0.1195	-0.3801	-0.51055	-0.9402	94.722	-2.85625	-7.57439	-14.4058	-1.65276
--	--	--	--	--	98.181	-0.11929	-0.37954	-0.51097	-0.93981	94.822	-2.85555	-7.57428	-14.4104	-1.6523
--	--	--	--	--	98.281	-0.11912	-0.37899	-0.51135	-0.93947	94.922	-2.85483	-7.57414	-14.4151	-1.65182
--	--	--	--	--	98.381	-0.11894	-0.37844	-0.51172	-0.93911	95.022	-2.85368	-7.57395	-14.4196	-1.65132
--	--	--	--	--	98.481	-0.11855	-0.37791	-0.5121	-0.93867	95.122	-2.85305	-7.57372	-14.4243	-1.65081
--	--	--	--	--	98.581	-0.11831	-0.37741	-0.51251	-0.93817	95.222	-2.8523	-7.57347	-14.4292	-1.6503
--	--	--	--	--	98.681	-0.1181	-0.37691	-0.51296	-0.93773	95.322	-2.8511	-7.57325	-14.4346	-1.64978
--	--	--	--	--	98.781	-0.11781	-0.37642	-0.51341	-0.93736	95.422	-2.8503	-7.57304	-14.4404	-1.64926
--	--	--	--	--	98.881	-0.11753	-0.3759	-0.51381	-0.93699	95.522	-2.84927	-7.57282	-14.4461	-1.64873
--	--	--	--	--	98.981	-0.11731	-0.37537	-0.51417	-0.93652	95.622	-2.84817	-7.57256	-14.4514	-1.6482
--	--	--	--	--	99.081	-0.11702	-0.37481	-0.51451	-0.93602	95.722	-2.84741	-7.57226	-14.4563	-1.64767
--	--	--	--	--	99.181	-0.11675	-0.37426	-0.51486	-0.93555	95.822	-2.84669	-7.57195	-14.461	-1.64713
--	--	--	--	--	99.281	-0.11654	-0.37371	-0.51523	-0.93513	95.922	-2.84537	-7.57165	-14.4656	-1.64654
--	--	--	--	--	99.381	-0.11629	-0.37316	-0.5156	-0.9347	96.022	-2.84429	-7.57137	-14.4703	-1.64591
--	--	--	--	--	99.481	-0.11598	-0.37261	-0.51599	-0.93422	96.122	-2.84354	-7.57108	-14.4753	-1.64527
--	--	--	--	--	99.581	-0.11564	-0.37207	-0.51635	-0.93371	96.222	-2.84284	-7.57076	-14.4805	-1.64465
--	--	--	--	--	99.681	-0.1153	-0.37153	-0.51667	-0.93323	96.322	-2.84205	-7.57041	-14.4859	-1.64404
--	--	--	--	--	99.781	-0.11495	-0.37101	-0.51693	-0.93278	96.422	-2.84105	-7.57002	-14.4911	-1.6434
--	--	--	--	--	99.881	-0.11469	-0.3705	-0.51717	-0.93232	96.522	-2.84001	-7.56958	-14.496	-1.64271
--	--	--	--	--	99.981	-0.11439	-0.36996	-0.51744	-0.93183	96.622	-2.83915	-7.56911	-14.5006	-1.64202
--	--	--	--	--	100.081	-0.11403	-0.36937	-0.51775	-0.93133	96.722	-2.8381	-7.56865	-14.505	-1.64137
--	--	--	--	--	100.181	-0.11368	-0.36874	-0.51809	-0.93081	96.822	-2.83726	-7.56822	-14.5094	-1.64076
--	--	--	--	--	100.281	-0.11338	-0.36813	-0.51842	-0.9303	96.922	-2.83648	-7.56781	-14.514	-1.64016
--	--	--	--	--	100.381	-0.11313	-0.3676	-0.5187	-0.92977	97.022	-2.83537	-7.56737	-14.5188	-1.63957
--	--	--	--	--	100.481	-0.11284	-0.36712	-0.51894	-0.92922	97.122	-2.83428	-7.56688	-14.5239	-1.63894
--	--	--	--	--	100.581	-0.11244	-0.36664	-0.51915	-0.92864	97.222	-2.83352	-7.56633	-14.5291	-1.63828
--	--	--	--	--	100.681	-0.1121	-0.3661	-0.51935	-0.92805	97.322	-2.83267	-7.56575	-14.534	-1.63757
--	--	--	--	--	100.781	-0.11173	-0.36549	-0.51955	-0.92747	97.422	-2.83155	-7.56518	-14.5382	-1.63683
--	--	--	--	--	100.881	-0.11138	-0.36487	-0.51975	-0.92693	97.522	-2.83097	-7.56463	-14.5421	-1.63608
--	--	--	--	--	100.981	-0.11116	-0.36429	-0.51997	-0.92643	97.622	-2.83017	-7.56408	-14.546	-1.63533
--	--	--	--	--	101.081	-0.11101	-0.36378	-0.5202	-0.92591	97.722	-2.8289	-7.56352	-14.5502	-1.63461
--	--	--	--	--	101.181	-0.11043	-0.3633	-0.52042	-0.92532	97.822	-2.82821	-7.56296	-14.5545	-1.63389
--	--	--	--	--	101.281	-0.10998	-0.36283	-0.52063	-0.92467	97.922	-2.82736	-7.56237	-14.5589	-1.63312
--	--	--	--	--	101.381	-0.10983	-0.36236	-0.52083	-0.92404	98.022	-2.82625	-7.56175	-14.5632	-1.63225
--	--	--	--	--	101.481	-0.10952	-0.36182	-0.52102	-0.92346	98.122	-2.82526	-7.5611	-14.5674	-1.63137
--	--	--	--	--	101.581	-0.10915	-0.36118	-0.52121	-0.92288	98.222	-2.82437	-7.56045	-14.5714	-1.63059
--	--	--	--	--	101.681	-0.10887	-0.36045	-0.52139	-0.92224	98.322	-2.82374	-7.55978	-14.5751	-1.62986
--	--	--	--	--	101.781	-0.10858	-0.35976	-0.52157	-0.92155	98.422	-2.82262	-7.55913	-14.5788	-1.62904
--	--	--	--	--	101.881	-0.10817	-0.3592	-0.52174	-0.92091	98.522	-2.82118	-7.55848	-14.5828	-1.62802
--	--	--	--	--	101.981	-0.10794	-0.35873	-0.5219	-0.92034	98.622	-2.82043	-7.55785	-14.5873	-1.62699
--	--	--	--	--	102.081	-0.10761	-0.35827	-0.52205	-0.9198	98.722	-2.81951	-7.55722	-14.592	-1.62615
--	--	--	--	--	102.181	-0.10707	-0.35773	-0.5222	-0.91921	98.822	-2.81843	-7.55656	-14.5965	-1.6254
--	--	--	--	--	102.281	-0.10675	-0.35714	-0.52233	-0.91857	98.922	-2.81756	-7.55587	-14.6006	-1.62455
--	--	--	--	--	102.381	-0.10657	-0.35656	-0.52245	-0.91788	99.022	-2.81675	-7.55513	-14.6043	-1.62354
--	--	--	--	--	102.481	-0.10631	-0.35604	-0.52256	-0.91717	99.122	-2.81574	-7.55438	-14.6081	-1.62251
--	--	--	--	--	102.581	-0.10596	-0.35555	-0.52267	-0.91645	99.222	-2.81496	-7.55362	-14.612	-1.62161
--	--	--	--	--	102.681	-0.10561	-0.35502	-0.52278	-0.91576	99.322	-2.81427	-7.55284	-14.6161	-1.62076
--	--	--	--	--	102.781	-0.10517	-0.35439	-0.52288	-0.91509	99.422	-2.81341	-7.55205	-14.6204	-1.61985
--	--	--	--	--	102.881	-0.10487	-0.35367	-0.52298	-0.91443	99.522	-2.81237	-7.55126	-14.6248	-1.61884
--	--	--	--	--	102.981	-0.10451	-0.35297	-0.52307	-0.91375	99.622	-2.81135	-7.55045	-14.6289	-1.61783
--	--	--	--	--	103.081	-0.10411	-0.35235	-0.52314	-0.91306	99.722	-2.8103	-7.54966	-14.6323	-1.61689
--	--	--	--	--	103.181	-0.10387	-0.35179	-0.5232	-0.91235	99.822	-2.80936	-7.54889	-14.6352	-1.61599
--	--	--	--	--	103.281	-0.10355	-0.35127	-0.52326	-0.91162	99.922	-2.80861	-7.5481	-14.6382	-1.61506
--	--	--	--	--	103.381	-0.1032	-0.35075	-0.52332	-0.91091	100.022	-2.80766	-7.54724	-14.6417	-1.61407
--	--	--	--	--	103.481	-0.10286	-0.35021	-0.52337	-0.91022	100.122	-2.80663	-7.54627	-14.6459	-1.61306
--	--	--	--	--	103.581	-0.10253	-0.34963	-0.5234	-0.90952	100.222	-2.8057	-7.54527	-14.6502	-1.61205
--	--	--	--	--	103.681	-0.10222	-0.349	-0.52343	-0.90873	100.322	-2.80492	-7.54433	-14.6542	-1.61103
--	--	--	--	--	103.781	-0.10187	-0.34835	-0.52344	-0.90784	100.422	-2.80422	-7.54351	-14.6576	-1.60998
--	--	--	--	--	103.881	-0.1015	-0.34776	-0.52345	-0.90697	100.522	-2.80326	-7.54274	-14.6607	-1.60888
--	--	--	--	--	103.981	-0.10118	-0.34722	-0.52346	-0.90622	100.622	-2.80221	-7.5419	-14.6636	-1.60775
--	--	--	--	--	104.081	-0.10086	-0.34669	-0.52347	-0.90553	100.722	-2.80129	-7.54092	-14.6664	-1.60661
--	--	--	--	--	104.181	-0.10048	-0.34614	-0.52346	-0.90479	100.822	-2.80025	-7.53986	-14.6692	-1.60551
--	--	--	--	--	104.281	-0.10006	-0.34554	-0.52345	-0.90394	100.922	-2.79945	-7.53881	-14.6722	-1.60451
--	--	--	--	--	104.381	-0.09972	-0.34492	-0.52343	-0.90307	101.022	-2.79901	-7.53785	-14.6755	-1.60355
--	--	--	--	--	104.481	-0.09942	-0.3443	-0.5234	-0.90226	101.122	-2.7983	-7.53697	-14.6789	-1.60251
--	--	--	--	--	104.581	-0.09905	-0.34369	-0.52335	-0.90149	101.222	-2.79645	-7.53613	-14.6823	-1.60133
--	--	--	--	--	104.681	-0.09862	-0.3431	-0.5233	-0.90066	101.322	-2.79581	-7.5353	-14.6856	-1.60008
--	--	--	--	--	104.781	-0.09825	-0.34251	-0.52325	-0.89974	101.422	-2.79528	-7.53441	-14.6888	-1.59892
--	--	--	--	--	104.881	-0.09792	-0.34192	-0.52319	-0.89879	101.522	-2.79432	-7.53335	-14.692	-1.59784
--	--	--	--	--	104.981	-0.09748	-0.34132	-0.52313	-0.89789	101.622	-2.7934	-7.53207	-14.6952	-1.59671
--	--	--	--	--	105.081	-0.09699	-0.34071	-0.52306	-0.89704	101.722	-2.79273	-7.53071	-14.6984	-1.59546
--	--	--	--	--	105.181	-0.09661	-0.34009	-0.52298	-0.89622	101.822	-2.79178	-7.52951	-14.7017	-1.59419
--	--	--	--	--	105.281	-0.09624	-0.33949	-0.52291	-0.8954	101.922	-2.79083	-7.52853	-14.7049	-1.59305
--	--	--	--	--	105.381	-0.0959	-0.33893	-0.52283	-0.89448	102.022	-2.79029	-7.52765	-14.7081	-1.59202
--	--	--	--	--	105.481	-0.09546	-0.3384	-0.52273	-0.89339	102.122	-2.789	-7.5267	-14.7112	-1.59099
--	--	--	--	--	105.581	-0.09489	-0.33786	-0.52258	-0.89225	102.222	-2.78777	-7.52558	-14.7142	-1.58986
--	--	--	--	--	105.681	-0.09448	-0.33728	-0.52241	-0.89125	102.322	-2.78714	-7.52441	-14.7171	-1.58863
--	--	--	--	--	105.781	-0.09407	-0.33666	-0.52226	-0.89037	102.422	-2.78664	-7.5233	-14.7199	-1.58733
--	--	--	--	--	105.881	-0.09359	-0.33601	-0.52214	-0.88956	102.522	-2.78581	-7.5223	-14.7226	-1.586
--	--	--	--	--	105.981	-0.09315	-0.33536	-0.52203	-0.88873	102.622	-2.78489	-7.5213	-14.7254	-1.5847
--	--	--	--	--	106.081	-0.09271	-0.33471	-0.52192	-0.88784	102.722	-2.78384	-7.52015	-14.7286	-1.58345
--	--	--	--	--	106.181	-0.09215	-0.33408	-0.52178	-0.88685	102.822	-2.78279	-7.51876	-14.7318	-1.58224
--	--	--	--	--	106.281	-0.09178	-0.33348	-0.52161	-0.88579	102.922	-2.78206	-7.51726	-14.7348	-1.58103
--	--	--	--	--	106.381	-0.09141	-0.33288	-0.52143	-0.88479	103.022	-2.78092	-7.51587	-14.7375	-1.57978
--	--	--	--	--	106.481	-0.09098	-0.33229	-0.52124	-0.88391	103.122	-2.78011	-7.51463	-14.74	-1.57851
--	--	--	--	--	106.581	-0.09057	-0.33168	-0.52106	-0.88305	103.222	-2.77943	-7.51349	-14.7428	-1.57721
--	--	--	--	--	106.681	-0.0901	-0.33107	-0.52087	-0.88208	103.322	-2.77852	-7.51239	-14.7459	-1.5759
--	--	--	--	--	106.781	-0.08955	-0.33045	-0.52069	-0.88097	103.422	-2.77763	-7.51127	-14.749	-1.57464
--	--	--	--	--	106.881	-0.08908	-0.32984	-0.52049	-0.87981	103.522	-2.77676	-7.51007	-14.7516	-1.5734
--	--	--	--	--	106.981	-0.08869	-0.32923	-0.52028	-0.8787	103.622	-2.77595	-7.50876	-14.7539	-1.57209
--	--	--	--	--	107.081	-0.0882	-0.32862	-0.52004	-0.87766	103.722	-2.77515	-7.50735	-14.756	-1.57058
--	--	--	--	--	107.181	-0.08782	-0.328	-0.51979	-0.87669	103.822	-2.77421	-7.50597	-14.7582	-1.56898
--	--	--	--	--	107.281	-0.08743	-0.32735	-0.51954	-0.87575	103.922	-2.77334	-7.50472	-14.7605	-1.56751
--	--	--	--	--	107.381	-0.08692	-0.32667	-0.5193	-0.87476	104.022	-2.77256	-7.50354	-14.7629	-1.56624
--	--	--	--	--	107.481	-0.08647	-0.32596	-0.51904	-0.87368	104.122	-2.77172	-7.50235	-14.7651	-1.565
--	--	--	--	--	107.581	-0.08616	-0.32525	-0.51874	-0.87258	104.222	-2.7707	-7.50106	-14.7673	-1.5636
--	--	--	--	--	107.681	-0.0857	-0.3246	-0.51841	-0.87154	104.322	-2.76976	-7.49968	-14.7696	-1.56205
--	--	--	--	--	107.781	-0.08512	-0.32397	-0.51808	-0.87055	104.422	-2.769	-7.49827	-14.7722	-1.56055
--	--	--	--	--	107.881	-0.08476	-0.32333	-0.51778	-0.8695	104.522	-2.76824	-7.49687	-14.7751	-1.55918
--	--	--	--	--	107.981	-0.08436	-0.32262	-0.51751	-0.8683	104.622	-2.76726	-7.4955	-14.778	-1.55779
--	--	--	--	--	108.081	-0.08385	-0.32189	-0.51724	-0.86704	104.722	-2.7663	-7.49413	-14.7805	-1.55627
--	--	--	--	--	108.181	-0.08347	-0.3212	-0.51696	-0.8659	104.822	-2.76551	-7.49278	-14.7827	-1.55461
--	--	--	--	--	108.281	-0.08316	-0.3206	-0.51667	-0.86486	104.922	-2.76467	-7.49141	-14.7847	-1.55298
--	--	--	--	--	108.381	-0.08279	-0.32006	-0.51636	-0.8638	105.022	-2.76354	-7.49	-14.7868	-1.55144
--	--	--	--	--	108.481	-0.08246	-0.31952	-0.51604	-0.86262	105.122	-2.76255	-7.48855	-14.7888	-1.54999
--	--	--	--	--	108.581	-0.08216	-0.31895	-0.5157	-0.86137	105.222	-2.76171	-7.4871	-14.7908	-1.54858
--	--	--	--	--	108.681	-0.08186	-0.31832	-0.51537	-0.8601	105.322	-2.76092	-7.48573	-14.7926	-1.5471
--	--	--	--	--	108.781	-0.08149	-0.31764	-0.51505	-0.85887	105.422	-2.76014	-7.48445	-14.7945	-1.54538
--	--	--	--	--	108.881	-0.08105	-0.31689	-0.51474	-0.85766	105.522	-2.75896	-7.48319	-14.7968	-1.54343
--	--	--	--	--	108.981	-0.08065	-0.3161	-0.51439	-0.85648	105.622	-2.75786	-7.48186	-14.7996	-1.54153
--	--	--	--	--	109.081	-0.08045	-0.31532	-0.51397	-0.8553	105.722	-2.75702	-7.48043	-14.8024	-1.53991
--	--	--	--	--	109.181	-0.08024	-0.31457	-0.51348	-0.85409	105.822	-2.75606	-7.47891	-14.8046	-1.53846
--	--	--	--	--	109.281	-0.07992	-0.31387	-0.51298	-0.85289	105.922	-2.75503	-7.47734	-14.8062	-1.53706
--	--	--	--	--	109.381	-0.07967	-0.3132	-0.51251	-0.85174	106.022	-2.75415	-7.47577	-14.8076	-1.5356
--	--	--	--	--	109.481	-0.07945	-0.31258	-0.51206	-0.85067	106.122	-2.75306	-7.47421	-14.8091	-1.53401
--	--	--	--	--	109.581	-0.07922	-0.31201	-0.5116	-0.84964	106.222	-2.75201	-7.47271	-14.811	-1.53225
--	--	--	--	--	109.681	-0.07898	-0.31148	-0.51112	-0.84861	106.322	-2.7513	-7.47126	-14.813	-1.53046
--	--	--	--	--	109.781	-0.07878	-0.31096	-0.51065	-0.84752	106.422	-2.75043	-7.46982	-14.815	-1.52884
--	--	--	--	--	109.881	-0.07863	-0.31037	-0.5102	-0.8463	106.522	-2.74953	-7.46836	-14.8169	-1.52738
--	--	--	--	--	109.981	-0.07851	-0.3096	-0.50977	-0.8449	106.622	-2.74863	-7.46686	-14.8186	-1.52587
--	--	--	--	--	110.081	-0.07836	-0.30868	-0.50932	-0.84343	106.722	-2.74757	-7.46534	-14.8203	-1.52411
--	--	--	--	--	110.181	-0.07816	-0.30777	-0.50882	-0.84211	106.822	-2.74639	-7.46383	-14.822	-1.52216
--	--	--	--	--	110.281	-0.07802	-0.30704	-0.50827	-0.84094	106.922	-2.74553	-7.46233	-14.8237	-1.52021
--	--	--	--	--	110.381	-0.07791	-0.30644	-0.50773	-0.83974	107.022	-2.7446	-7.46083	-14.8255	-1.51838
--	--	--	--	--	110.481	-0.07781	-0.30584	-0.50723	-0.83837	107.122	-2.74358	-7.45931	-14.8273	-1.51667
--	--	--	--	--	110.581	-0.07774	-0.30516	-0.50675	-0.83695	107.222	-2.74282	-7.45775	-14.8291	-1.51507
--	--	--	--	--	110.681	-0.07765	-0.30443	-0.50623	-0.83566	107.322	-2.74183	-7.45611	-14.8308	-1.51347
--	--	--	--	--	110.781	-0.07758	-0.3037	-0.50563	-0.83448	107.422	-2.74071	-7.45437	-14.8325	-1.51174
--	--	--	--	--	110.881	-0.07754	-0.303	-0.50498	-0.83328	107.522	-2.73985	-7.45258	-14.8342	-1.50989
--	--	--	--	--	110.981	-0.07749	-0.30229	-0.50436	-0.83194	107.622	-2.73913	-7.45087	-14.8361	-1.50805
--	--	--	--	--	111.081	-0.07745	-0.30153	-0.50378	-0.8305	107.722	-2.7378	-7.44928	-14.838	-1.50636
--	--	--	--	--	111.181	-0.07743	-0.30073	-0.50325	-0.829	107.822	-2.73669	-7.44771	-14.8398	-1.50468
--	--	--	--	--	111.281	-0.07742	-0.29994	-0.50274	-0.82746	107.922	-2.73584	-7.44603	-14.8413	-1.50282
--	--	--	--	--	111.381	-0.07742	-0.29922	-0.50224	-0.82589	108.022	-2.73474	-7.44421	-14.8427	-1.50073
--	--	--	--	--	111.481	-0.07742	-0.29856	-0.50171	-0.82436	108.122	-2.73353	-7.44238	-14.844	-1.49868
--	--	--	--	--	111.581	-0.07744	-0.29788	-0.50114	-0.823	108.222	-2.73271	-7.44074	-14.8453	-1.49686
--	--	--	--	--	111.681	-0.07746	-0.29714	-0.5005	-0.82185	108.322	-2.73182	-7.43931	-14.8467	-1.49514
--	--	--	--	--	111.781	-0.07749	-0.29637	-0.49981	-0.8207	108.422	-2.73086	-7.43796	-14.8481	-1.49329
--	--	--	--	--	111.881	-0.07754	-0.29562	-0.49911	-0.81929	108.522	-2.73	-7.43658	-14.8495	-1.49126
--	--	--	--	--	111.981	-0.07758	-0.29492	-0.49841	-0.81766	108.622	-2.72917	-7.43509	-14.8509	-1.48914
--	--	--	--	--	112.081	-0.07763	-0.29429	-0.49773	-0.81615	108.722	-2.72823	-7.43345	-14.8522	-1.48705
--	--	--	--	--	112.181	-0.07769	-0.29368	-0.49707	-0.81491	108.822	-2.72701	-7.43165	-14.8534	-1.48501
--	--	--	--	--	112.281	-0.07776	-0.29308	-0.49641	-0.81372	108.922	-2.72559	-7.4297	-14.8547	-1.48302
--	--	--	--	--	112.381	-0.07782	-0.29247	-0.49573	-0.81234	109.022	-2.72454	-7.42771	-14.856	-1.48106
--	--	--	--	--	112.481	-0.07786	-0.29182	-0.495	-0.81078	109.122	-2.72393	-7.42576	-14.8576	-1.47908
--	--	--	--	--	112.581	-0.07794	-0.29111	-0.49425	-0.80931	109.222	-2.72297	-7.42391	-14.8593	-1.47706
--	--	--	--	--	112.681	-0.07802	-0.29035	-0.49352	-0.80807	109.322	-2.72182	-7.42216	-14.8609	-1.47509
--	--	--	--	--	112.781	-0.07808	-0.28956	-0.49284	-0.80685	109.422	-2.7209	-7.42052	-14.8623	-1.47324
--	--	--	--	--	112.881	-0.07819	-0.28876	-0.49218	-0.80545	109.522	-2.71996	-7.419	-14.8637	-1.47149
--	--	--	--	--	112.981	-0.07828	-0.28797	-0.4915	-0.80383	109.622	-2.7189	-7.41759	-14.865	-1.46978
--	--	--	--	--	113.081	-0.07833	-0.28721	-0.49076	-0.8022	109.722	-2.7178	-7.41629	-14.8664	-1.46804
--	--	--	--	--	113.181	-0.0784	-0.28647	-0.48998	-0.8007	109.822	-2.71687	-7.41492	-14.8677	-1.46616
--	--	--	--	--	113.281	-0.07849	-0.28574	-0.48917	-0.79931	109.922	-2.71613	-7.41326	-14.8688	-1.46401
--	--	--	--	--	113.381	-0.07856	-0.28498	-0.48837	-0.79801	110.022	-2.71539	-7.41112	-14.8699	-1.46158
--	--	--	--	--	113.481	-0.07865	-0.2842	-0.48756	-0.79668	110.122	-2.71424	-7.40871	-14.8711	-1.45921
--	--	--	--	--	113.581	-0.07873	-0.28341	-0.48674	-0.79522	110.222	-2.71297	-7.40659	-14.8724	-1.45715
--	--	--	--	--	113.681	-0.07878	-0.28263	-0.48591	-0.79356	110.322	-2.71201	-7.4049	-14.8737	-1.45522
--	--	--	--	--	113.781	-0.07883	-0.28185	-0.4851	-0.79188	110.422	-2.71093	-7.4034	-14.8749	-1.4531
--	--	--	--	--	113.881	-0.07891	-0.28106	-0.48433	-0.79032	110.522	-2.71014	-7.40182	-14.876	-1.45075
--	--	--	--	--	113.981	-0.07896	-0.28024	-0.48358	-0.78889	110.622	-2.70925	-7.40003	-14.877	-1.44844
--	--	--	--	--	114.081	-0.07902	-0.27943	-0.48282	-0.78754	110.722	-2.70812	-7.39816	-14.8782	-1.44639
--	--	--	--	--	114.181	-0.0791	-0.27865	-0.48198	-0.78622	110.822	-2.70723	-7.39633	-14.8795	-1.44444
--	--	--	--	--	114.281	-0.07914	-0.27791	-0.48107	-0.78486	110.922	-2.70628	-7.39455	-14.8807	-1.44236
--	--	--	--	--	114.381	-0.07918	-0.2772	-0.48013	-0.78341	111.022	-2.70512	-7.39271	-14.8819	-1.44004
--	--	--	--	--	114.481	-0.07923	-0.27653	-0.4792	-0.78192	111.122	-2.70412	-7.39073	-14.8829	-1.43759
--	--	--	--	--	114.581	-0.07927	-0.27586	-0.47832	-0.78044	111.222	-2.70345	-7.38868	-14.8839	-1.43506
--	--	--	--	--	114.681	-0.0793	-0.27518	-0.4775	-0.77901	111.322	-2.70252	-7.38674	-14.8848	-1.43246
--	--	--	--	--	114.781	-0.07937	-0.27446	-0.47675	-0.7776	111.422	-2.7014	-7.385	-14.8856	-1.42983
--	--	--	--	--	114.881	-0.0794	-0.2737	-0.47599	-0.77618	111.522	-2.70028	-7.38332	-14.8865	-1.42735
--	--	--	--	--	114.981	-0.07941	-0.27292	-0.47515	-0.77473	111.622	-2.69919	-7.38155	-14.8875	-1.42525
--	--	--	--	--	115.081	-0.07944	-0.27217	-0.47415	-0.77326	111.722	-2.69836	-7.37962	-14.8886	-1.42337
--	--	--	--	--	115.181	-0.07947	-0.27143	-0.47307	-0.77177	111.822	-2.69722	-7.37765	-14.8897	-1.4213
--	--	--	--	--	115.281	-0.07949	-0.27069	-0.47204	-0.77025	111.922	-2.69614	-7.3758	-14.8907	-1.41873
--	--	--	--	--	115.381	-0.07951	-0.26997	-0.47113	-0.76871	112.022	-2.69528	-7.37411	-14.8918	-1.41599
--	--	--	--	--	115.481	-0.07953	-0.26923	-0.47028	-0.76718	112.122	-2.69414	-7.37252	-14.8927	-1.41365
--	--	--	--	--	115.581	-0.07955	-0.26846	-0.46942	-0.76572	112.222	-2.69295	-7.371	-14.8936	-1.41165
--	--	--	--	--	115.681	-0.07956	-0.26766	-0.4685	-0.76431	112.322	-2.69189	-7.36947	-14.8945	-1.40955
--	--	--	--	--	115.781	-0.07958	-0.26684	-0.46752	-0.76288	112.422	-2.69108	-7.36789	-14.8955	-1.40705
--	--	--	--	--	115.881	-0.07959	-0.26602	-0.4665	-0.76134	112.522	-2.69026	-7.36619	-14.8964	-1.40441
--	--	--	--	--	115.981	-0.0796	-0.2652	-0.46547	-0.75976	112.622	-2.689	-7.36433	-14.8974	-1.40208
--	--	--	--	--	116.081	-0.07961	-0.26442	-0.46447	-0.75825	112.722	-2.68815	-7.36237	-14.8982	-1.40004
--	--	--	--	--	116.181	-0.07962	-0.26368	-0.46356	-0.75683	112.822	-2.68704	-7.36035	-14.899	-1.39788
--	--	--	--	--	116.281	-0.07963	-0.26295	-0.46271	-0.75544	112.922	-2.68547	-7.35832	-14.8998	-1.39531
--	--	--	--	--	116.381	-0.07963	-0.26222	-0.46183	-0.75399	113.022	-2.6845	-7.35634	-14.9006	-1.39249
--	--	--	--	--	116.481	-0.07964	-0.26146	-0.46084	-0.75247	113.122	-2.68381	-7.35443	-14.9015	-1.38978
--	--	--	--	--	116.581	-0.07965	-0.2607	-0.45973	-0.75087	113.222	-2.68261	-7.35257	-14.9023	-1.38729
--	--	--	--	--	116.681	-0.07966	-0.25996	-0.4586	-0.74923	113.322	-2.68146	-7.3507	-14.9032	-1.38498
--	--	--	--	--	116.781	-0.07967	-0.25926	-0.45756	-0.74765	113.422	-2.68041	-7.34875	-14.904	-1.38275
--	--	--	--	--	116.881	-0.07968	-0.25854	-0.45656	-0.74618	113.522	-2.67908	-7.34676	-14.9048	-1.3804
--	--	--	--	--	116.981	-0.07969	-0.25778	-0.45553	-0.7448	113.622	-2.67811	-7.34476	-14.9056	-1.37771
--	--	--	--	--	117.081	-0.0797	-0.25698	-0.45441	-0.74348	113.722	-2.67737	-7.34279	-14.9064	-1.37479
--	--	--	--	--	117.181	-0.07971	-0.25622	-0.45325	-0.74213	113.822	-2.67634	-7.34079	-14.9071	-1.37194
--	--	--	--	--	117.281	-0.07973	-0.25554	-0.45217	-0.74066	113.922	-2.67512	-7.33875	-14.9078	-1.36933
--	--	--	--	--	117.381	-0.07974	-0.25492	-0.45121	-0.73901	114.022	-2.67439	-7.33667	-14.9085	-1.36689
--	--	--	--	--	117.481	-0.07976	-0.25427	-0.45027	-0.73732	114.122	-2.67305	-7.33463	-14.9092	-1.36457
--	--	--	--	--	117.581	-0.07978	-0.25352	-0.44926	-0.73579	114.222	-2.67178	-7.33268	-14.9099	-1.36225
--	--	--	--	--	117.681	-0.0798	-0.25272	-0.44811	-0.73441	114.322	-2.67102	-7.33084	-14.9107	-1.3598
--	--	--	--	--	117.781	-0.07981	-0.25195	-0.44691	-0.73311	114.422	-2.66998	-7.32908	-14.9114	-1.35721
--	--	--	--	--	117.881	-0.07984	-0.25125	-0.44575	-0.7318	114.522	-2.66875	-7.32738	-14.9122	-1.35457
--	--	--	--	--	117.981	-0.07987	-0.25059	-0.44464	-0.73039	114.622	-2.66799	-7.32568	-14.9128	-1.352
--	--	--	--	--	118.081	-0.07989	-0.24991	-0.44353	-0.72879	114.722	-2.66693	-7.3239	-14.9134	-1.34948
--	--	--	--	--	118.181	-0.07992	-0.24917	-0.44236	-0.72709	114.822	-2.66489	-7.32201	-14.9139	-1.34697
--	--	--	--	--	118.281	-0.07997	-0.24841	-0.44117	-0.72551	114.922	-2.66421	-7.32005	-14.9145	-1.34441
--	--	--	--	--	118.381	-0.08001	-0.24766	-0.44001	-0.72412	115.022	-2.66369	-7.31808	-14.9151	-1.3418
--	--	--	--	--	118.481	-0.08005	-0.24693	-0.43894	-0.72281	115.122	-2.66267	-7.31617	-14.9158	-1.33915
--	--	--	--	--	118.581	-0.08008	-0.24623	-0.43791	-0.72146	115.222	-2.66131	-7.31428	-14.9165	-1.33645
--	--	--	--	--	118.681	-0.08012	-0.24555	-0.43688	-0.72007	115.322	-2.66025	-7.31242	-14.9171	-1.33368
--	--	--	--	--	118.781	-0.08017	-0.24486	-0.43579	-0.71868	115.422	-2.65919	-7.31055	-14.9177	-1.33088
--	--	--	--	--	118.881	-0.0802	-0.24415	-0.43464	-0.7173	115.522	-2.65796	-7.30863	-14.9182	-1.32814
--	--	--	--	--	118.981	-0.08024	-0.24339	-0.4334	-0.71586	115.622	-2.6568	-7.30663	-14.9187	-1.32554
--	--	--	--	--	119.081	-0.08029	-0.24264	-0.4321	-0.71431	115.722	-2.65575	-7.30456	-14.9192	-1.32297
--	--	--	--	--	119.181	-0.08033	-0.24197	-0.43087	-0.71268	115.822	-2.65449	-7.30244	-14.9198	-1.32026
--	--	--	--	--	119.281	-0.08038	-0.24137	-0.42979	-0.71105	115.922	-2.65349	-7.30032	-14.9203	-1.31736
--	--	--	--	--	119.381	-0.08043	-0.24079	-0.42882	-0.70949	116.022	-2.65277	-7.29824	-14.9209	-1.31448
--	--	--	--	--	119.481	-0.08048	-0.24018	-0.42784	-0.70808	116.122	-2.65184	-7.29626	-14.9213	-1.31176
--	--	--	--	--	119.581	-0.08052	-0.23952	-0.42673	-0.70679	116.222	-2.65026	-7.29437	-14.9218	-1.30916
--	--	--	--	--	119.681	-0.08058	-0.23883	-0.42548	-0.7055	116.322	-2.64906	-7.2925	-14.9222	-1.30651
--	--	--	--	--	119.781	-0.08066	-0.23816	-0.42423	-0.70408	116.422	-2.64817	-7.29057	-14.9226	-1.30374
--	--	--	--	--	119.881	-0.08073	-0.23752	-0.42306	-0.70256	116.522	-2.64704	-7.28858	-14.9231	-1.30082
--	--	--	--	--	119.981	-0.08078	-0.23686	-0.42197	-0.70107	116.622	-2.64615	-7.28662	-14.9236	-1.29774
--	--	--	--	--	120.081	-0.08084	-0.23618	-0.42088	-0.69969	116.722	-2.64479	-7.28475	-14.924	-1.29465
--	--	--	--	--	120.181	-0.08091	-0.23547	-0.41974	-0.69838	116.822	-2.64348	-7.28292	-14.9244	-1.29171
--	--	--	--	--	120.281	-0.08097	-0.23478	-0.41858	-0.69708	116.922	-2.64248	-7.28101	-14.9248	-1.28897
--	--	--	--	--	120.381	-0.08105	-0.23413	-0.41745	-0.69576	117.022	-2.64121	-7.27895	-14.9252	-1.28637
--	--	--	--	--	120.481	-0.08111	-0.2335	-0.41637	-0.69437	117.122	-2.64018	-7.27687	-14.9256	-1.28382
--	--	--	--	--	120.581	-0.08116	-0.23289	-0.41524	-0.69292	117.222	-2.63911	-7.27496	-14.926	-1.28114
--	--	--	--	--	120.681	-0.08124	-0.23228	-0.41395	-0.69152	117.322	-2.63808	-7.27327	-14.9264	-1.27811
--	--	--	--	--	120.781	-0.08131	-0.23167	-0.4125	-0.69026	117.422	-2.63704	-7.27162	-14.9267	-1.27479
--	--	--	--	--	120.881	-0.08137	-0.23106	-0.41108	-0.68903	117.522	-2.63571	-7.2698	-14.9269	-1.27156
--	--	--	--	--	120.981	-0.08147	-0.23046	-0.40988	-0.6877	117.622	-2.6347	-7.26773	-14.9273	-1.26867
--	--	--	--	--	121.081	-0.08153	-0.22985	-0.40884	-0.68625	117.722	-2.63388	-7.26561	-14.9276	-1.26601
--	--	--	--	--	121.181	-0.08163	-0.22923	-0.40781	-0.68485	117.822	-2.63291	-7.26364	-14.9279	-1.26342
--	--	--	--	--	121.281	-0.08174	-0.2286	-0.40668	-0.68362	117.922	-2.63168	-7.26185	-14.9282	-1.26074
--	--	--	--	--	121.381	-0.08184	-0.22799	-0.40546	-0.68245	118.022	-2.6306	-7.26008	-14.9284	-1.25776
--	--	--	--	--	121.481	-0.08192	-0.22741	-0.4042	-0.68121	118.122	-2.62966	-7.25818	-14.9287	-1.25437
--	--	--	--	--	121.581	-0.08199	-0.22683	-0.40296	-0.67985	118.222	-2.62826	-7.25616	-14.9289	-1.25094
--	--	--	--	--	121.681	-0.08208	-0.22622	-0.40178	-0.67842	118.322	-2.62672	-7.25412	-14.9292	-1.24788
--	--	--	--	--	121.781	-0.0822	-0.22555	-0.40069	-0.677	118.422	-2.62574	-7.25211	-14.9294	-1.24512
--	--	--	--	--	121.881	-0.08232	-0.22489	-0.39969	-0.67569	118.522	-2.62452	-7.25017	-14.9296	-1.24239
--	--	--	--	--	121.981	-0.08245	-0.22428	-0.39872	-0.67456	118.622	-2.62359	-7.24829	-14.9297	-1.23953
--	--	--	--	--	122.081	-0.08261	-0.22373	-0.39772	-0.67356	118.722	-2.62232	-7.24643	-14.9299	-1.2366
--	--	--	--	--	122.181	-0.08273	-0.2232	-0.39664	-0.67253	118.822	-2.62126	-7.24453	-14.93	-1.23369
--	--	--	--	--	122.281	-0.08285	-0.22263	-0.39544	-0.67135	118.922	-2.62055	-7.24251	-14.9302	-1.23073
--	--	--	--	--	122.381	-0.08305	-0.22205	-0.39407	-0.67001	119.022	-2.61957	-7.24041	-14.9303	-1.22758
--	--	--	--	--	122.481	-0.08318	-0.22149	-0.39259	-0.66855	119.122	-2.61864	-7.2384	-14.9304	-1.22416
--	--	--	--	--	122.581	-0.08333	-0.22098	-0.39117	-0.6671	119.222	-2.61773	-7.23663	-14.9305	-1.22062
--	--	--	--	--	122.681	-0.08353	-0.22048	-0.38998	-0.66586	119.322	-2.61662	-7.235	-14.9306	-1.21712
--	--	--	--	--	122.781	-0.08371	-0.21997	-0.38894	-0.66484	119.422	-2.61559	-7.23337	-14.9307	-1.21382
--	--	--	--	--	122.881	-0.08383	-0.21943	-0.38791	-0.66378	119.522	-2.61469	-7.23159	-14.9307	-1.21084
--	--	--	--	--	122.981	-0.08407	-0.2189	-0.38681	-0.66245	119.622	-2.61376	-7.22968	-14.9307	-1.20802
--	--	--	--	--	123.081	-0.0843	-0.21844	-0.38566	-0.66101	119.722	-2.61254	-7.22775	-14.9308	-1.20506
--	--	--	--	--	123.181	-0.08454	-0.21804	-0.38455	-0.65982	119.822	-2.6111	-7.22589	-14.9308	-1.20174
--	--	--	--	--	123.281	-0.08482	-0.21765	-0.3835	-0.65888	119.922	-2.61014	-7.22405	-14.9308	-1.1983
--	--	--	--	--	123.381	-0.08503	-0.21723	-0.38244	-0.65793	120.022	-2.60919	-7.22214	-14.9308	-1.19502
--	--	--	--	--	123.481	-0.08525	-0.21674	-0.38127	-0.65674	120.122	-2.60815	-7.22013	-14.9308	-1.19193
--	--	--	--	--	123.581	-0.08564	-0.2162	-0.37996	-0.65539	120.222	-2.60712	-7.2181	-14.9307	-1.18892
--	--	--	--	--	123.681	-0.08594	-0.21561	-0.37865	-0.65414	120.322	-2.60607	-7.21613	-14.9307	-1.1859
--	--	--	--	--	123.781	-0.08624	-0.21503	-0.3775	-0.65301	120.422	-2.60493	-7.21426	-14.9306	-1.18275
--	--	--	--	--	123.881	-0.0866	-0.21453	-0.37648	-0.65189	120.522	-2.60421	-7.21244	-14.9306	-1.17939
--	--	--	--	--	123.981	-0.08688	-0.21411	-0.37548	-0.65072	120.622	-2.60336	-7.21063	-14.9305	-1.17597
--	--	--	--	--	124.081	-0.08719	-0.21374	-0.37438	-0.64962	120.722	-2.60223	-7.20881	-14.9304	-1.17276
--	--	--	--	--	124.181	-0.08754	-0.21333	-0.37316	-0.64867	120.822	-2.60154	-7.207	-14.9302	-1.1698
--	--	--	--	--	124.281	-0.08789	-0.21287	-0.37193	-0.64782	120.922	-2.6005	-7.20518	-14.9301	-1.16675
--	--	--	--	--	124.381	-0.08821	-0.21238	-0.37074	-0.64695	121.022	-2.59943	-7.20335	-14.9299	-1.16334
--	--	--	--	--	124.481	-0.08854	-0.21194	-0.36961	-0.64596	121.122	-2.59861	-7.20148	-14.9298	-1.15978
--	--	--	--	--	124.581	-0.08891	-0.21152	-0.36851	-0.64488	121.222	-2.59736	-7.19956	-14.9296	-1.15647
--	--	--	--	--	124.681	-0.08927	-0.21113	-0.36741	-0.64381	121.322	-2.5962	-7.19764	-14.9295	-1.1535
--	--	--	--	--	124.781	-0.08953	-0.21071	-0.36629	-0.64273	121.422	-2.59527	-7.19579	-14.9293	-1.15052
--	--	--	--	--	124.881	-0.08998	-0.2103	-0.36513	-0.64158	121.522	-2.59456	-7.194	-14.929	-1.14724
--	--	--	--	--	124.981	-0.09067	-0.20991	-0.36394	-0.64032	121.622	-2.59388	-7.19215	-14.9288	-1.14367
--	--	--	--	--	125.081	-0.0911	-0.20955	-0.36275	-0.63916	121.722	-2.59293	-7.19013	-14.9286	-1.13996
--	--	--	--	--	125.181	-0.09147	-0.20921	-0.36163	-0.63823	121.822	-2.59188	-7.18798	-14.9284	-1.13633
--	--	--	--	--	125.281	-0.09228	-0.20886	-0.36058	-0.63739	121.922	-2.59093	-7.18591	-14.9282	-1.13307
--	--	--	--	--	125.381	-0.09278	-0.2085	-0.35956	-0.63641	122.022	-2.58988	-7.18405	-14.9279	-1.13027
--	--	--	--	--	125.481	-0.09323	-0.20812	-0.35855	-0.63528	122.122	-2.58872	-7.18229	-14.9277	-1.12761
--	--	--	--	--	125.581	-0.0937	-0.20774	-0.35754	-0.63421	122.222	-2.58803	-7.18048	-14.9274	-1.1247
--	--	--	--	--	125.681	-0.09421	-0.20736	-0.3565	-0.63331	122.322	-2.58693	-7.17856	-14.9271	-1.12131
--	--	--	--	--	125.781	-0.09477	-0.20701	-0.35542	-0.63247	122.422	-2.58585	-7.17663	-14.9267	-1.1175
--	--	--	--	--	125.881	-0.09531	-0.20671	-0.35431	-0.63154	122.522	-2.5851	-7.17482	-14.9263	-1.1134
--	--	--	--	--	125.981	-0.09594	-0.20643	-0.35316	-0.63051	122.622	-2.58415	-7.17311	-14.9259	-1.10954
--	--	--	--	--	126.081	-0.0966	-0.20615	-0.35198	-0.62948	122.722	-2.58307	-7.17139	-14.9256	-1.10639
--	--	--	--	--	126.181	-0.0972	-0.20586	-0.3508	-0.62851	122.822	-2.58236	-7.16955	-14.9253	-1.10354
--	--	--	--	--	126.281	-0.09773	-0.20555	-0.34964	-0.62763	122.922	-2.58159	-7.16766	-14.9249	-1.10023
--	--	--	--	--	126.381	-0.09819	-0.20526	-0.34854	-0.62684	123.022	-2.58037	-7.16588	-14.9245	-1.09611
--	--	--	--	--	126.481	-0.09871	-0.20499	-0.3475	-0.62606	123.122	-2.57947	-7.16435	-14.9242	-1.0921
--	--	--	--	--	126.581	-0.09936	-0.20473	-0.34652	-0.62521	123.222	-2.57836	-7.16294	-14.9238	-1.08899
--	--	--	--	--	126.681	-0.10007	-0.20448	-0.34558	-0.62427	123.322	-2.57737	-7.1615	-14.9234	-1.08628
--	--	--	--	--	126.781	-0.10071	-0.20421	-0.34457	-0.62335	123.422	-2.57663	-7.15986	-14.923	-1.08317
--	--	--	--	--	126.881	-0.10143	-0.20394	-0.34345	-0.62252	123.522	-2.57561	-7.15797	-14.9226	-1.07927
--	--	--	--	--	126.981	-0.10196	-0.20367	-0.34227	-0.62174	123.622	-2.57423	-7.15586	-14.9221	-1.07519
--	--	--	--	--	127.081	-0.10257	-0.2034	-0.34116	-0.62095	123.722	-2.57341	-7.15361	-14.9216	-1.07152
--	--	--	--	--	127.181	-0.10317	-0.20316	-0.34019	-0.62014	123.822	-2.5723	-7.15146	-14.9211	-1.06804
--	--	--	--	--	127.281	-0.10364	-0.20293	-0.33929	-0.6193	123.922	-2.57134	-7.14965	-14.9207	-1.06442
--	--	--	--	--	127.381	-0.10442	-0.2027	-0.33837	-0.61846	124.022	-2.57053	-7.14812	-14.9203	-1.06072
--	--	--	--	--	127.481	-0.1049	-0.20247	-0.33736	-0.61765	124.122	-2.56962	-7.14661	-14.9198	-1.05735
--	--	--	--	--	127.581	-0.10544	-0.20223	-0.3363	-0.6169	124.222	-2.56865	-7.14486	-14.9193	-1.05445
--	--	--	--	--	127.681	-0.10635	-0.202	-0.3353	-0.61619	124.322	-2.56777	-7.1429	-14.9187	-1.05168
--	--	--	--	--	127.781	-0.10676	-0.20178	-0.33436	-0.61545	124.422	-2.56696	-7.14093	-14.9182	-1.04865
--	--	--	--	--	127.881	-0.10716	-0.20159	-0.33339	-0.61461	124.522	-2.56611	-7.13912	-14.9177	-1.04519
--	--	--	--	--	127.981	-0.10773	-0.20141	-0.33227	-0.61374	124.622	-2.56518	-7.1374	-14.9172	-1.04153
--	--	--	--	--	128.081	-0.10839	-0.20123	-0.331	-0.61289	124.722	-2.56445	-7.13565	-14.9167	-1.03789
--	--	--	--	--	128.181	-0.10912	-0.20107	-0.32979	-0.61211	124.822	-2.56377	-7.13382	-14.9161	-1.03411
--	--	--	--	--	128.281	-0.10974	-0.20093	-0.32879	-0.61138	124.922	-2.56246	-7.132	-14.9155	-1.02989
--	--	--	--	--	128.381	-0.11029	-0.2008	-0.32795	-0.6107	125.022	-2.56107	-7.13029	-14.9149	-1.02548
--	--	--	--	--	128.481	-0.11072	-0.20068	-0.32713	-0.61004	125.122	-2.5604	-7.12869	-14.9143	-1.02167
--	--	--	--	--	128.581	-0.11116	-0.20055	-0.32623	-0.60936	125.222	-2.55921	-7.12709	-14.9138	-1.01853
--	--	--	--	--	128.681	-0.11184	-0.2004	-0.32526	-0.60866	125.322	-2.55774	-7.12541	-14.9132	-1.01533
--	--	--	--	--	128.781	-0.11237	-0.20024	-0.32427	-0.60794	125.422	-2.55687	-7.12362	-14.9127	-1.01141
--	--	--	--	--	128.881	-0.11277	-0.2001	-0.32331	-0.60721	125.522	-2.55597	-7.12174	-14.9122	-1.00716
--	--	--	--	--	128.981	-0.11319	-0.19998	-0.32235	-0.60649	125.622	-2.55506	-7.11982	-14.9116	-1.0034
--	--	--	--	--	129.081	-0.11366	-0.19987	-0.32137	-0.60579	125.722	-2.55403	-7.11795	-14.911	-1.00013
--	--	--	--	--	129.181	-0.11412	-0.19977	-0.32034	-0.60511	125.822	-2.553	-7.11625	-14.9104	-0.99678
--	--	--	--	--	129.281	-0.11455	-0.19968	-0.3193	-0.60446	125.922	-2.55197	-7.11471	-14.9098	-0.99293
--	--	--	--	--	129.381	-0.11513	-0.19959	-0.3183	-0.60383	126.022	-2.55076	-7.11322	-14.9091	-0.9888
--	--	--	--	--	129.481	-0.11581	-0.19948	-0.31733	-0.60321	126.122	-2.54961	-7.11165	-14.9085	-0.98474
--	--	--	--	--	129.581	-0.11612	-0.19937	-0.31632	-0.60259	126.222	-2.54859	-7.10995	-14.9078	-0.98095
--	--	--	--	--	129.681	-0.11646	-0.19927	-0.31522	-0.60196	126.322	-2.54772	-7.10823	-14.9071	-0.97749
--	--	--	--	--	129.781	-0.11686	-0.19919	-0.31406	-0.60131	126.422	-2.54688	-7.10658	-14.9064	-0.97425
--	--	--	--	--	129.881	-0.11718	-0.19912	-0.31295	-0.60065	126.522	-2.54588	-7.105	-14.9058	-0.97089
--	--	--	--	--	129.981	-0.11743	-0.19905	-0.31195	-0.60002	126.622	-2.54465	-7.10343	-14.9053	-0.96709
--	--	--	--	--	130.081	-0.11784	-0.19898	-0.31103	-0.59943	126.722	-2.54349	-7.1018	-14.9047	-0.96303
--	--	--	--	--	130.181	-0.11816	-0.19892	-0.31015	-0.59886	126.822	-2.54229	-7.10007	-14.904	-0.95917
--	--	--	--	--	130.281	-0.11843	-0.19887	-0.30927	-0.5983	126.922	-2.54115	-7.0983	-14.9033	-0.95563
--	--	--	--	--	130.381	-0.11869	-0.19883	-0.30837	-0.59772	127.022	-2.54024	-7.0965	-14.9026	-0.95217
--	--	--	--	--	130.481	-0.1189	-0.19879	-0.30744	-0.59709	127.122	-2.53908	-7.09473	-14.9019	-0.94857
--	--	--	--	--	130.581	-0.11913	-0.19875	-0.30648	-0.59643	127.222	-2.53819	-7.09303	-14.9013	-0.94479
--	--	--	--	--	130.681	-0.11937	-0.1987	-0.3055	-0.5958	127.322	-2.53716	-7.09138	-14.9007	-0.94089
--	--	--	--	--	130.781	-0.11956	-0.19867	-0.30454	-0.59524	127.422	-2.53582	-7.0897	-14.9001	-0.937
--	--	--	--	--	130.881	-0.1197	-0.19865	-0.3036	-0.59472	127.522	-2.53516	-7.08787	-14.8994	-0.93329
--	--	--	--	--	130.981	-0.11985	-0.19863	-0.3027	-0.59422	127.622	-2.53372	-7.08594	-14.8987	-0.92983
--	--	--	--	--	131.081	-0.12003	-0.19861	-0.30187	-0.59369	127.722	-2.53241	-7.08406	-14.8981	-0.92635
--	--	--	--	--	131.181	-0.12022	-0.1986	-0.30103	-0.5931	127.822	-2.53179	-7.08231	-14.8975	-0.92249
--	--	--	--	--	131.281	-0.12032	-0.19859	-0.30012	-0.59247	127.922	-2.53089	-7.08066	-14.8968	-0.91822
--	--	--	--	--	131.381	-0.12039	-0.19859	-0.29909	-0.59186	128.022	-2.52973	-7.07903	-14.896	-0.91385
--	--	--	--	--	131.481	-0.12045	-0.19858	-0.29802	-0.59133	128.122	-2.52839	-7.07742	-14.8951	-0.90965
--	--	--	--	--	131.581	-0.12052	-0.19858	-0.29703	-0.59084	128.222	-2.52703	-7.07589	-14.8943	-0.90571
--	--	--	--	--	131.681	-0.12057	-0.19859	-0.29613	-0.59037	128.322	-2.52587	-7.07452	-14.8937	-0.90202
--	--	--	--	--	131.781	-0.12056	-0.19859	-0.29526	-0.58991	128.422	-2.52482	-7.07324	-14.8931	-0.89847
--	--	--	--	--	131.881	-0.12056	-0.1986	-0.29434	-0.58942	128.522	-2.52401	-7.0719	-14.8925	-0.89488
--	--	--	--	--	131.981	-0.12053	-0.19862	-0.29338	-0.58891	128.622	-2.52287	-7.07035	-14.8919	-0.89115
--	--	--	--	--	132.081	-0.12049	-0.19863	-0.29241	-0.58839	128.722	-2.52144	-7.06855	-14.8912	-0.88726
--	--	--	--	--	132.181	-0.12041	-0.19865	-0.29148	-0.58787	128.822	-2.52044	-7.0667	-14.8905	-0.88321
--	--	--	--	--	132.281	-0.12032	-0.19867	-0.29059	-0.58736	128.922	-2.51953	-7.06499	-14.8898	-0.8791
--	--	--	--	--	132.381	-0.12024	-0.19869	-0.28975	-0.58687	129.022	-2.51851	-7.06344	-14.8891	-0.87502
--	--	--	--	--	132.481	-0.12012	-0.19871	-0.28896	-0.5864	129.122	-2.51739	-7.06202	-14.8884	-0.87103
--	--	--	--	--	132.581	-0.11995	-0.19873	-0.28816	-0.58593	129.222	-2.5163	-7.06066	-14.8877	-0.86714
--	--	--	--	--	132.681	-0.11981	-0.19876	-0.28728	-0.58544	129.322	-2.5152	-7.05925	-14.8869	-0.86333
--	--	--	--	--	132.781	-0.11961	-0.19879	-0.2863	-0.58494	129.422	-2.51329	-7.05764	-14.8862	-0.85957
--	--	--	--	--	132.881	-0.11936	-0.19882	-0.28528	-0.58447	129.522	-2.51193	-7.05576	-14.8855	-0.85583
--	--	--	--	--	132.981	-0.11928	-0.19885	-0.28435	-0.584	129.622	-2.51107	-7.05381	-14.8847	-0.85202
--	--	--	--	--	133.081	-0.11906	-0.19888	-0.2835	-0.58352	129.722	-2.50997	-7.05207	-14.8839	-0.84804
--	--	--	--	--	133.181	-0.11871	-0.19892	-0.28265	-0.58299	129.822	-2.50872	-7.05051	-14.8831	-0.84389
--	--	--	--	--	133.281	-0.11853	-0.19895	-0.28172	-0.58248	129.922	-2.50791	-7.04893	-14.8823	-0.83977
--	--	--	--	--	133.381	-0.11829	-0.19899	-0.28076	-0.58205	130.022	-2.50683	-7.04716	-14.8816	-0.83583
--	--	--	--	--	133.481	-0.11802	-0.19902	-0.27985	-0.58167	130.122	-2.50535	-7.04536	-14.8809	-0.83204
--	--	--	--	--	133.581	-0.11777	-0.19906	-0.27906	-0.58126	130.222	-2.50432	-7.04377	-14.8802	-0.82833
--	--	--	--	--	133.681	-0.11747	-0.19909	-0.27834	-0.58077	130.322	-2.50317	-7.04238	-14.8796	-0.82455
--	--	--	--	--	133.781	-0.117	-0.19913	-0.27759	-0.58026	130.422	-2.50217	-7.04099	-14.8789	-0.82049
--	--	--	--	--	133.881	-0.1167	-0.19917	-0.27678	-0.57981	130.522	-2.50123	-7.03935	-14.8781	-0.81605
--	--	--	--	--	133.981	-0.11649	-0.1992	-0.27589	-0.5794	130.622	-2.50002	-7.03748	-14.8774	-0.81156
--	--	--	--	--	134.081	-0.11617	-0.19924	-0.27499	-0.57896	130.722	-2.49882	-7.03565	-14.8767	-0.80739
--	--	--	--	--	134.181	-0.11568	-0.19928	-0.27409	-0.57849	130.822	-2.49783	-7.03401	-14.8759	-0.80354
--	--	--	--	--	134.281	-0.11538	-0.19932	-0.2732	-0.578	130.922	-2.49697	-7.0325	-14.8752	-0.7999
--	--	--	--	--	134.381	-0.11504	-0.19936	-0.27231	-0.57753	131.022	-2.49592	-7.03105	-14.8745	-0.79624
--	--	--	--	--	134.481	-0.1146	-0.19939	-0.27144	-0.57708	131.122	-2.49431	-7.02957	-14.8739	-0.79226
--	--	--	--	--	134.581	-0.11428	-0.19942	-0.27061	-0.57665	131.222	-2.49284	-7.028	-14.8732	-0.78773
--	--	--	--	--	134.681	-0.11388	-0.19945	-0.26986	-0.57621	131.322	-2.49182	-7.02627	-14.8725	-0.783
--	--	--	--	--	134.781	-0.11343	-0.19948	-0.26913	-0.57575	131.422	-2.49103	-7.02452	-14.8717	-0.77866
--	--	--	--	--	134.881	-0.11305	-0.19951	-0.26834	-0.57528	131.522	-2.49003	-7.02296	-14.8708	-0.77478
--	--	--	--	--	134.981	-0.11269	-0.19954	-0.26742	-0.5748	131.622	-2.48784	-7.02168	-14.8701	-0.77113
--	--	--	--	--	135.081	-0.11206	-0.19957	-0.26642	-0.57433	131.722	-2.48693	-7.0205	-14.8694	-0.76752
--	--	--	--	--	135.181	-0.11152	-0.19959	-0.26548	-0.57388	131.822	-2.48626	-7.01922	-14.8687	-0.76383
--	--	--	--	--	135.281	-0.11102	-0.19961	-0.26468	-0.57345	131.922	-2.48506	-7.01768	-14.868	-0.75994
--	--	--	--	--	135.381	-0.11053	-0.19963	-0.26394	-0.57304	132.022	-2.48384	-7.01602	-14.8672	-0.75584
--	--	--	--	--	135.481	-0.11012	-0.19965	-0.26315	-0.5726	132.122	-2.48273	-7.01441	-14.8664	-0.75163
--	--	--	--	--	135.581	-0.10935	-0.19967	-0.26228	-0.57213	132.222	-2.48132	-7.01292	-14.8657	-0.74742
--	--	--	--	--	135.681	-0.10896	-0.19968	-0.2614	-0.57163	132.322	-2.48026	-7.0115	-14.865	-0.7433
--	--	--	--	--	135.781	-0.10847	-0.19969	-0.2606	-0.57115	132.422	-2.47938	-7.01007	-14.8643	-0.73938
--	--	--	--	--	135.881	-0.10782	-0.1997	-0.25985	-0.57068	132.522	-2.47802	-7.00863	-14.8637	-0.73551
--	--	--	--	--	135.981	-0.10727	-0.19971	-0.2591	-0.57022	132.622	-2.47679	-7.00718	-14.863	-0.73152
--	--	--	--	--	136.081	-0.10671	-0.19971	-0.25829	-0.56975	132.722	-2.47582	-7.00573	-14.8622	-0.72735
--	--	--	--	--	136.181	-0.10636	-0.19971	-0.25744	-0.56928	132.822	-2.4743	-7.00428	-14.8614	-0.72321
--	--	--	--	--	136.281	-0.10594	-0.19971	-0.2566	-0.56882	132.922	-2.47331	-7.0028	-14.8606	-0.71924
--	--	--	--	--	136.381	-0.10533	-0.1997	-0.25582	-0.56837	133.022	-2.47284	-7.00128	-14.8598	-0.71522
--	--	--	--	--	136.481	-0.10482	-0.1997	-0.25506	-0.56791	133.122	-2.47123	-6.99975	-14.8591	-0.71082
--	--	--	--	--	136.581	-0.10419	-0.19969	-0.25427	-0.56744	133.222	-2.47004	-6.99825	-14.8584	-0.70621
--	--	--	--	--	136.681	-0.10352	-0.19967	-0.25344	-0.56697	133.322	-2.46924	-6.99681	-14.8576	-0.70205
--	--	--	--	--	136.781	-0.10303	-0.19965	-0.25261	-0.56651	133.422	-2.46821	-6.99538	-14.8568	-0.69854
--	--	--	--	--	136.881	-0.10255	-0.19962	-0.25182	-0.56605	133.522	-2.46721	-6.99392	-14.856	-0.69513
--	--	--	--	--	136.981	-0.10185	-0.19959	-0.25109	-0.56559	133.622	-2.46629	-6.99245	-14.8554	-0.69116
--	--	--	--	--	137.081	-0.10126	-0.19955	-0.25041	-0.5651	133.722	-2.46497	-6.99101	-14.8548	-0.68666
--	--	--	--	--	137.181	-0.10077	-0.19952	-0.24977	-0.5646	133.822	-2.46358	-6.98961	-14.8541	-0.68231
--	--	--	--	--	137.281	-0.10016	-0.19948	-0.24914	-0.5641	133.922	-2.46283	-6.98822	-14.8534	-0.67846
--	--	--	--	--	137.381	-0.09947	-0.19944	-0.24849	-0.56363	134.022	-2.4621	-6.98679	-14.8526	-0.67471
--	--	--	--	--	137.481	-0.09907	-0.1994	-0.24779	-0.56319	134.122	-2.4609	-6.98527	-14.8518	-0.67061
--	--	--	--	--	137.581	-0.09851	-0.19935	-0.24705	-0.56277	134.222	-2.45966	-6.98369	-14.851	-0.66619
--	--	--	--	--	137.681	-0.09784	-0.1993	-0.24629	-0.56231	134.322	-2.45891	-6.98206	-14.8502	-0.66179
--	--	--	--	--	137.781	-0.09727	-0.19924	-0.24555	-0.56177	134.422	-2.45781	-6.98048	-14.8494	-0.65762
--	--	--	--	--	137.881	-0.09665	-0.19917	-0.24482	-0.56122	134.522	-2.4568	-6.97905	-14.8486	-0.65358
--	--	--	--	--	137.981	-0.09616	-0.19911	-0.24409	-0.56068	134.622	-2.45597	-6.97783	-14.8479	-0.64959
--	--	--	--	--	138.081	-0.09554	-0.19904	-0.24337	-0.56017	134.722	-2.45487	-6.97662	-14.8472	-0.64551
--	--	--	--	--	138.181	-0.09489	-0.19896	-0.24265	-0.55966	134.822	-2.45383	-6.97521	-14.8465	-0.64125
--	--	--	--	--	138.281	-0.09444	-0.19888	-0.24195	-0.55914	134.922	-2.45301	-6.9735	-14.8457	-0.63682
--	--	--	--	--	138.381	-0.09391	-0.19879	-0.24128	-0.55861	135.022	-2.45198	-6.97179	-14.8448	-0.63242
--	--	--	--	--	138.481	-0.0933	-0.19869	-0.24061	-0.55805	135.122	-2.45044	-6.97044	-14.8438	-0.62819
--	--	--	--	--	138.581	-0.0926	-0.19859	-0.23995	-0.55751	135.222	-2.44944	-6.96937	-14.843	-0.62414
--	--	--	--	--	138.681	-0.09196	-0.19849	-0.23927	-0.557	135.322	-2.44824	-6.96833	-14.8423	-0.62027
--	--	--	--	--	138.781	-0.0914	-0.19839	-0.23861	-0.55651	135.422	-2.44738	-6.96708	-14.8415	-0.6164
--	--	--	--	--	138.881	-0.09069	-0.19828	-0.23797	-0.556	135.522	-2.44618	-6.96555	-14.8407	-0.61227
--	--	--	--	--	138.981	-0.0901	-0.19816	-0.23735	-0.55544	135.622	-2.44479	-6.9639	-14.8398	-0.60779
--	--	--	--	--	139.081	-0.08965	-0.19804	-0.23673	-0.55489	135.722	-2.4441	-6.96231	-14.839	-0.60323
--	--	--	--	--	139.181	-0.08922	-0.19792	-0.23611	-0.55437	135.822	-2.44282	-6.96082	-14.8382	-0.59886
--	--	--	--	--	139.281	-0.08874	-0.1978	-0.23548	-0.55387	135.922	-2.44167	-6.95948	-14.8374	-0.59461
--	--	--	--	--	139.381	-0.08823	-0.19767	-0.23484	-0.55335	136.022	-2.44054	-6.95825	-14.8366	-0.59035
--	--	--	--	--	139.481	-0.0878	-0.19753	-0.23419	-0.55278	136.122	-2.4396	-6.95701	-14.8358	-0.58606
--	--	--	--	--	139.581	-0.08729	-0.19739	-0.23354	-0.55216	136.222	-2.43895	-6.95566	-14.8349	-0.58185
--	--	--	--	--	139.681	-0.08665	-0.19725	-0.23288	-0.5515	136.322	-2.43793	-6.9542	-14.834	-0.57775
--	--	--	--	--	139.781	-0.08622	-0.19711	-0.23223	-0.55085	136.422	-2.43683	-6.95273	-14.8332	-0.57365
--	--	--	--	--	139.881	-0.08562	-0.19696	-0.23164	-0.55027	136.522	-2.43583	-6.95136	-14.8323	-0.56944
--	--	--	--	--	139.981	-0.08516	-0.1968	-0.23111	-0.54974	136.622	-2.43452	-6.95002	-14.8314	-0.5652
--	--	--	--	--	140.081	-0.08475	-0.19663	-0.23056	-0.54917	136.722	-2.43338	-6.94864	-14.8305	-0.56104
--	--	--	--	--	140.181	-0.08422	-0.19645	-0.22992	-0.54855	136.822	-2.43254	-6.94715	-14.8296	-0.55699
--	--	--	--	--	140.281	-0.08373	-0.19629	-0.22918	-0.54791	136.922	-2.43147	-6.94559	-14.8287	-0.55292
--	--	--	--	--	140.381	-0.08327	-0.19612	-0.2285	-0.54728	137.022	-2.43016	-6.94397	-14.8279	-0.5487
--	--	--	--	--	140.481	-0.08289	-0.19595	-0.228	-0.54665	137.122	-2.42919	-6.94241	-14.8271	-0.54437
--	--	--	--	--	140.581	-0.08245	-0.19576	-0.22759	-0.54603	137.222	-2.42823	-6.94102	-14.8264	-0.54
--	--	--	--	--	140.681	-0.08195	-0.19556	-0.2272	-0.54541	137.322	-2.42692	-6.93981	-14.8256	-0.53573
--	--	--	--	--	140.781	-0.08156	-0.19536	-0.22673	-0.54474	137.422	-2.42588	-6.93866	-14.8248	-0.53174
--	--	--	--	--	140.881	-0.08128	-0.19515	-0.22621	-0.54406	137.522	-2.42512	-6.93745	-14.8239	-0.52806
--	--	--	--	--	140.981	-0.08095	-0.19495	-0.22569	-0.54339	137.622	-2.42385	-6.93614	-14.823	-0.52434
--	--	--	--	--	141.081	-0.08056	-0.19475	-0.22521	-0.54276	137.722	-2.42271	-6.93479	-14.8221	-0.52015
--	--	--	--	--	141.181	-0.08027	-0.19455	-0.22476	-0.54214	137.822	-2.42158	-6.93346	-14.8211	-0.51549
--	--	--	--	--	141.281	-0.07996	-0.19433	-0.2243	-0.54148	137.922	-2.42049	-6.93216	-14.8202	-0.51081
--	--	--	--	--	141.381	-0.07961	-0.19411	-0.22384	-0.54083	138.022	-2.41955	-6.93088	-14.8192	-0.50644
--	--	--	--	--	141.481	-0.07944	-0.19388	-0.22339	-0.54024	138.122	-2.41821	-6.9296	-14.8183	-0.50222
--	--	--	--	--	141.581	-0.07929	-0.19365	-0.22296	-0.53972	138.222	-2.41716	-6.92829	-14.8173	-0.49799
--	--	--	--	--	141.681	-0.07908	-0.19342	-0.22255	-0.53919	138.322	-2.41625	-6.92692	-14.8164	-0.49366
--	--	--	--	--	141.781	-0.0788	-0.19321	-0.22213	-0.53859	138.422	-2.41513	-6.92548	-14.8154	-0.4892
--	--	--	--	--	141.881	-0.07859	-0.19299	-0.22167	-0.53791	138.522	-2.41388	-6.92404	-14.8145	-0.4847
--	--	--	--	--	141.981	-0.07845	-0.19277	-0.2212	-0.53716	138.622	-2.41244	-6.92268	-14.8135	-0.48043
--	--	--	--	--	142.081	-0.07832	-0.19252	-0.22077	-0.5364	138.722	-2.4113	-6.92139	-14.8126	-0.47647
--	--	--	--	--	142.181	-0.0782	-0.19222	-0.22041	-0.53568	138.822	-2.40998	-6.9201	-14.8116	-0.47253
--	--	--	--	--	142.281	-0.07809	-0.19191	-0.22008	-0.53504	138.922	-2.40856	-6.91877	-14.8107	-0.46831
--	--	--	--	--	142.381	-0.07796	-0.19163	-0.21973	-0.53443	139.022	-2.40746	-6.91743	-14.8097	-0.4639
--	--	--	--	--	142.481	-0.07788	-0.19139	-0.21932	-0.53376	139.122	-2.40653	-6.91614	-14.8088	-0.45967
--	--	--	--	--	142.581	-0.07782	-0.19117	-0.2189	-0.53301	139.222	-2.40556	-6.9149	-14.8078	-0.45575
--	--	--	--	--	142.681	-0.07776	-0.19092	-0.21854	-0.53227	139.322	-2.40446	-6.91366	-14.8068	-0.45188
--	--	--	--	--	142.781	-0.07773	-0.19065	-0.21824	-0.53157	139.422	-2.40337	-6.91237	-14.8057	-0.44777
--	--	--	--	--	142.881	-0.07771	-0.19035	-0.21795	-0.5309	139.522	-2.40241	-6.91105	-14.8047	-0.44329
--	--	--	--	--	142.981	-0.07771	-0.19003	-0.21764	-0.53022	139.622	-2.40098	-6.90976	-14.8035	-0.43846
--	--	--	--	--	143.081	-0.07772	-0.18972	-0.21731	-0.52951	139.722	-2.3997	-6.90854	-14.8024	-0.4335
--	--	--	--	--	143.181	-0.07774	-0.18943	-0.217	-0.52875	139.822	-2.39853	-6.90736	-14.8013	-0.42891
--	--	--	--	--	143.281	-0.07777	-0.18917	-0.21672	-0.52792	139.922	-2.39704	-6.90613	-14.8003	-0.42486
--	--	--	--	--	143.381	-0.07782	-0.18891	-0.21647	-0.5271	140.022	-2.39605	-6.90481	-14.7994	-0.42091
--	--	--	--	--	143.481	-0.0779	-0.18862	-0.21624	-0.52632	140.122	-2.39479	-6.90346	-14.7983	-0.41664
--	--	--	--	--	143.581	-0.07797	-0.18831	-0.21601	-0.52556	140.222	-2.39337	-6.90218	-14.797	-0.41208
--	--	--	--	--	143.681	-0.07804	-0.18801	-0.21578	-0.5248	140.322	-2.39202	-6.90098	-14.7956	-0.40752
--	--	--	--	--	143.781	-0.07814	-0.18773	-0.21556	-0.52405	140.422	-2.39078	-6.89979	-14.7944	-0.40307
--	--	--	--	--	143.881	-0.07826	-0.18744	-0.21533	-0.52331	140.522	-2.3896	-6.89854	-14.7935	-0.3987
--	--	--	--	--	143.981	-0.07837	-0.18712	-0.2151	-0.52259	140.622	-2.38811	-6.89724	-14.7927	-0.39437
--	--	--	--	--	144.081	-0.07846	-0.18678	-0.21488	-0.52185	140.722	-2.38654	-6.89592	-14.7918	-0.38994
--	--	--	--	--	144.181	-0.07852	-0.18645	-0.21467	-0.52109	140.822	-2.38542	-6.89461	-14.7907	-0.38531
--	--	--	--	--	144.281	-0.07871	-0.18617	-0.21447	-0.52029	140.922	-2.38436	-6.89334	-14.7896	-0.38066
--	--	--	--	--	144.381	-0.07885	-0.18592	-0.21429	-0.51947	141.022	-2.38297	-6.89211	-14.7884	-0.37627
--	--	--	--	--	144.481	-0.0789	-0.18565	-0.21412	-0.51866	141.122	-2.38152	-6.8909	-14.7874	-0.37208
--	--	--	--	--	144.581	-0.07905	-0.18532	-0.21396	-0.51792	141.222	-2.38039	-6.88969	-14.7863	-0.36783
--	--	--	--	--	144.681	-0.07926	-0.18496	-0.2138	-0.51725	141.322	-2.37873	-6.88843	-14.7852	-0.36346
--	--	--	--	--	144.781	-0.0794	-0.18463	-0.21365	-0.51655	141.422	-2.37742	-6.88714	-14.7841	-0.35931
--	--	--	--	--	144.881	-0.07952	-0.18434	-0.21352	-0.5157	141.522	-2.37665	-6.88585	-14.783	-0.35568
--	--	--	--	--	144.981	-0.07965	-0.18408	-0.21342	-0.51476	141.622	-2.37577	-6.88462	-14.7819	-0.35232
--	--	--	--	--	145.081	-0.07977	-0.18381	-0.21333	-0.51388	141.722	-2.37425	-6.88345	-14.7809	-0.34878
--	--	--	--	--	145.181	-0.07989	-0.18353	-0.21325	-0.51312	141.822	-2.37257	-6.88232	-14.7797	-0.34468
--	--	--	--	--	145.281	-0.08001	-0.18321	-0.21317	-0.51238	141.922	-2.37131	-6.8812	-14.7784	-0.34011
--	--	--	--	--	145.381	-0.08015	-0.18286	-0.21309	-0.51159	142.022	-2.37024	-6.88002	-14.7771	-0.33531
--	--	--	--	--	145.481	-0.08029	-0.1825	-0.21302	-0.51076	142.122	-2.36906	-6.87866	-14.7759	-0.3306
--	--	--	--	--	145.581	-0.08039	-0.18213	-0.21294	-0.50991	142.222	-2.36799	-6.87715	-14.7749	-0.32632
--	--	--	--	--	145.681	-0.08045	-0.18179	-0.21288	-0.50906	142.322	-2.36665	-6.87568	-14.7739	-0.32248
--	--	--	--	--	145.781	-0.08051	-0.18145	-0.21284	-0.5082	142.422	-2.36502	-6.87444	-14.7727	-0.31861
--	--	--	--	--	145.881	-0.08058	-0.18114	-0.21282	-0.50733	142.522	-2.36394	-6.87336	-14.7713	-0.3143
--	--	--	--	--	145.981	-0.08064	-0.18083	-0.21281	-0.5065	142.622	-2.36259	-6.87229	-14.77	-0.30973
--	--	--	--	--	146.081	-0.08068	-0.18052	-0.21281	-0.5057	142.722	-2.36117	-6.87111	-14.7688	-0.30533
--	--	--	--	--	146.181	-0.08071	-0.18021	-0.21281	-0.5049	142.822	-2.36008	-6.86982	-14.7678	-0.30122
--	--	--	--	--	146.281	-0.08073	-0.17989	-0.21283	-0.50405	142.922	-2.35912	-6.86844	-14.7667	-0.29722
--	--	--	--	--	146.381	-0.08073	-0.17956	-0.21285	-0.50318	143.022	-2.35769	-6.86704	-14.7654	-0.29314
--	--	--	--	--	146.481	-0.08072	-0.17922	-0.21288	-0.50233	143.122	-2.35624	-6.86571	-14.7641	-0.28885
--	--	--	--	--	146.581	-0.0807	-0.17888	-0.21292	-0.50154	143.222	-2.35508	-6.86452	-14.7629	-0.28419
--	--	--	--	--	146.681	-0.08066	-0.17854	-0.21297	-0.50076	143.322	-2.3539	-6.86341	-14.7618	-0.27935
--	--	--	--	--	146.781	-0.0806	-0.17821	-0.21302	-0.49994	143.422	-2.35234	-6.86225	-14.7607	-0.27467
--	--	--	--	--	146.881	-0.08053	-0.1779	-0.21309	-0.49909	143.522	-2.3508	-6.861	-14.7596	-0.27024
--	--	--	--	--	146.981	-0.08045	-0.1776	-0.21317	-0.49822	143.622	-2.34966	-6.85972	-14.7585	-0.26592
--	--	--	--	--	147.081	-0.08034	-0.1773	-0.21328	-0.49734	143.722	-2.34846	-6.85851	-14.7574	-0.26161
--	--	--	--	--	147.181	-0.08022	-0.17699	-0.21342	-0.49647	143.822	-2.34698	-6.85736	-14.7562	-0.25738
--	--	--	--	--	147.281	-0.08011	-0.17666	-0.21356	-0.49564	143.922	-2.34559	-6.85617	-14.755	-0.25328
--	--	--	--	--	147.381	-0.07998	-0.17632	-0.21368	-0.49482	144.022	-2.34434	-6.85484	-14.7537	-0.24922
--	--	--	--	--	147.481	-0.07981	-0.17598	-0.2138	-0.49398	144.122	-2.34361	-6.85346	-14.7524	-0.24506
--	--	--	--	--	147.581	-0.07963	-0.17567	-0.21393	-0.49312	144.222	-2.34258	-6.85222	-14.7511	-0.24074
--	--	--	--	--	147.681	-0.07937	-0.17535	-0.21409	-0.49224	144.322	-2.34043	-6.85119	-14.7498	-0.23628
--	--	--	--	--	147.781	-0.07912	-0.17501	-0.21427	-0.49135	144.422	-2.33962	-6.8502	-14.7485	-0.23176
--	--	--	--	--	147.881	-0.07894	-0.17467	-0.21445	-0.49048	144.522	-2.33891	-6.84907	-14.7473	-0.22746
--	--	--	--	--	147.981	-0.07863	-0.17433	-0.21463	-0.48966	144.622	-2.33707	-6.84773	-14.746	-0.22365
--	--	--	--	--	148.081	-0.07839	-0.17401	-0.21481	-0.48883	144.722	-2.33523	-6.84637	-14.7446	-0.22003
--	--	--	--	--	148.181	-0.07821	-0.17371	-0.21499	-0.48791	144.822	-2.33414	-6.84517	-14.7432	-0.21598
--	--	--	--	--	148.281	-0.07791	-0.1734	-0.21518	-0.48693	144.922	-2.33287	-6.84413	-14.742	-0.21111
--	--	--	--	--	148.381	-0.07766	-0.17309	-0.21539	-0.48604	145.022	-2.33166	-6.84314	-14.7409	-0.20611
--	--	--	--	--	148.481	-0.07744	-0.17278	-0.21563	-0.48527	145.122	-2.33048	-6.84211	-14.7398	-0.20175
--	--	--	--	--	148.581	-0.07714	-0.17247	-0.21587	-0.48453	145.222	-2.32921	-6.84099	-14.7388	-0.19783
--	--	--	--	--	148.681	-0.07678	-0.17216	-0.2161	-0.4837	145.322	-2.32786	-6.83976	-14.7377	-0.19384
--	--	--	--	--	148.781	-0.07656	-0.17185	-0.21631	-0.4828	145.422	-2.32603	-6.83843	-14.7364	-0.18958
--	--	--	--	--	148.881	-0.07631	-0.17153	-0.21652	-0.48192	145.522	-2.32444	-6.83706	-14.7348	-0.18518
--	--	--	--	--	148.981	-0.07596	-0.17122	-0.21675	-0.48108	145.622	-2.32329	-6.83574	-14.7331	-0.18075
--	--	--	--	--	149.081	-0.07564	-0.17091	-0.21703	-0.48023	145.722	-2.32235	-6.83448	-14.7316	-0.17629
--	--	--	--	--	149.181	-0.07537	-0.17061	-0.21733	-0.47931	145.822	-2.32123	-6.83329	-14.7302	-0.17181
--	--	--	--	--	149.281	-0.07491	-0.17031	-0.21765	-0.47838	145.922	-2.31973	-6.83215	-14.7289	-0.1674
--	--	--	--	--	149.381	-0.07455	-0.17001	-0.21797	-0.4775	146.022	-2.31857	-6.83103	-14.7276	-0.16319
--	--	--	--	--	149.481	-0.07429	-0.16972	-0.2183	-0.47664	146.122	-2.3174	-6.8299	-14.7263	-0.15913
--	--	--	--	--	149.581	-0.07399	-0.16941	-0.21865	-0.47572	146.222	-2.31596	-6.82875	-14.725	-0.15498
--	--	--	--	--	149.681	-0.07366	-0.16908	-0.21901	-0.47477	146.322	-2.31459	-6.82757	-14.7239	-0.15057
--	--	--	--	--	149.781	-0.07338	-0.16874	-0.21935	-0.47391	146.422	-2.31351	-6.82636	-14.7227	-0.14615
--	--	--	--	--	149.881	-0.07315	-0.16842	-0.21966	-0.47318	146.522	-2.31232	-6.82514	-14.7216	-0.14199
--	--	--	--	--	149.981	-0.07286	-0.16811	-0.21996	-0.47246	146.622	-2.31096	-6.82391	-14.7204	-0.13803
--	--	--	--	--	150.081	-0.07251	-0.16783	-0.22025	-0.47158	146.722	-2.30961	-6.8227	-14.7192	-0.13404
--	--	--	--	--	150.181	-0.07225	-0.16757	-0.22054	-0.47058	146.822	-2.30839	-6.82153	-14.7179	-0.12987
--	--	--	--	--	150.281	-0.072	-0.16731	-0.22085	-0.46967	146.922	-2.30718	-6.82041	-14.7167	-0.12554
--	--	--	--	--	150.381	-0.07172	-0.16705	-0.22121	-0.4689	147.022	-2.30589	-6.81935	-14.7152	-0.12114
--	--	--	--	--	150.481	-0.07147	-0.16678	-0.22162	-0.46818	147.122	-2.30449	-6.81828	-14.7136	-0.11677
--	--	--	--	--	150.581	-0.07122	-0.1665	-0.22204	-0.4674	147.222	-2.30327	-6.81714	-14.7119	-0.11254
--	--	--	--	--	150.681	-0.07092	-0.16618	-0.22246	-0.46653	147.322	-2.30227	-6.81592	-14.7104	-0.10845
--	--	--	--	--	150.781	-0.07071	-0.16583	-0.22289	-0.46563	147.422	-2.30097	-6.8147	-14.7091	-0.10435
--	--	--	--	--	150.881	-0.07056	-0.16548	-0.22333	-0.46471	147.522	-2.29969	-6.81352	-14.708	-0.10016
--	--	--	--	--	150.981	-0.07038	-0.16514	-0.22379	-0.46376	147.622	-2.2982	-6.81239	-14.7067	-0.09585
--	--	--	--	--	151.081	-0.07015	-0.16483	-0.22423	-0.46278	147.722	-2.29642	-6.81123	-14.7053	-0.09145
--	--	--	--	--	151.181	-0.06998	-0.16454	-0.22463	-0.46184	147.822	-2.2952	-6.81001	-14.7038	-0.08709
--	--	--	--	--	151.281	-0.06986	-0.16427	-0.22502	-0.46099	147.922	-2.29403	-6.80878	-14.7024	-0.08295
--	--	--	--	--	151.381	-0.06973	-0.164	-0.22544	-0.4602	148.022	-2.29225	-6.8076	-14.7012	-0.07895
--	--	--	--	--	151.481	-0.06963	-0.16374	-0.22589	-0.45947	148.122	-2.29136	-6.80648	-14.6999	-0.07471
--	--	--	--	--	151.581	-0.06956	-0.16348	-0.22636	-0.45876	148.222	-2.29023	-6.80539	-14.6987	-0.06999
--	--	--	--	--	151.681	-0.06949	-0.16319	-0.2268	-0.458	148.322	-2.28884	-6.80428	-14.6974	-0.06528
--	--	--	--	--	151.781	-0.06943	-0.16286	-0.22722	-0.45716	148.422	-2.28784	-6.80317	-14.6961	-0.06123
--	--	--	--	--	151.881	-0.06939	-0.16251	-0.22765	-0.45626	148.522	-2.28677	-6.80206	-14.6947	-0.05761
--	--	--	--	--	151.981	-0.06936	-0.16216	-0.22813	-0.45534	148.622	-2.28527	-6.80095	-14.6934	-0.05384
--	--	--	--	--	152.081	-0.06936	-0.16184	-0.22863	-0.45444	148.722	-2.28398	-6.79984	-14.6922	-0.04959
--	--	--	--	--	152.181	-0.06937	-0.16155	-0.22914	-0.45361	148.822	-2.28311	-6.79872	-14.6911	-0.0452
--	--	--	--	--	152.281	-0.0694	-0.16127	-0.22964	-0.45283	148.922	-2.28188	-6.7976	-14.6899	-0.04103
--	--	--	--	--	152.381	-0.06946	-0.16099	-0.2301	-0.45205	149.022	-2.28045	-6.79648	-14.6887	-0.03696
--	--	--	--	--	152.481	-0.06953	-0.16069	-0.23053	-0.45121	149.122	-2.27932	-6.79538	-14.6873	-0.03267
--	--	--	--	--	152.581	-0.06963	-0.16037	-0.23094	-0.45035	149.222	-2.27798	-6.79429	-14.6858	-0.02812
--	--	--	--	--	152.681	-0.06972	-0.16005	-0.23136	-0.44949	149.322	-2.27613	-6.79323	-14.6844	-0.02366
--	--	--	--	--	152.781	-0.06982	-0.15977	-0.23184	-0.44866	149.422	-2.27496	-6.79218	-14.6829	-0.01945
--	--	--	--	--	152.881	-0.07001	-0.15952	-0.23237	-0.44784	149.522	-2.27388	-6.79111	-14.6815	-0.01518
--	--	--	--	--	152.981	-0.07014	-0.15926	-0.2329	-0.44706	149.622	-2.27259	-6.78997	-14.68	-0.01058
--	--	--	--	--	153.081	-0.07032	-0.15895	-0.23342	-0.44631	149.722	-2.27129	-6.78876	-14.6786	-0.00604
--	--	--	--	--	153.181	-0.07063	-0.1586	-0.23393	-0.44556	149.822	-2.27021	-6.78757	-14.6773	-0.00215
--	--	--	--	--	153.281	-0.07075	-0.15827	-0.23444	-0.44482	149.922	-2.2692	-6.78645	-14.6761	0.0013
--	--	--	--	--	153.381	-0.07099	-0.15798	-0.23496	-0.44406	150.022	-2.26775	-6.7854	-14.6749	0.00506
--	--	--	--	--	153.481	-0.07123	-0.15772	-0.2355	-0.44327	150.122	-2.26632	-6.78442	-14.6738	0.00969
--	--	--	--	--	153.581	-0.07145	-0.15747	-0.23605	-0.44246	150.222	-2.26519	-6.78348	-14.6728	0.01453
--	--	--	--	--	153.681	-0.07175	-0.15722	-0.2366	-0.44164	150.322	-2.26396	-6.78257	-14.6715	0.01867
--	--	--	--	--	153.781	-0.07196	-0.15694	-0.23708	-0.44083	150.422	-2.26262	-6.78164	-14.6702	0.02226
--	--	--	--	--	153.881	-0.07226	-0.15661	-0.23748	-0.44005	150.522	-2.26138	-6.78067	-14.6687	0.02588
--	--	--	--	--	153.981	-0.07256	-0.15624	-0.23787	-0.43926	150.622	-2.25986	-6.77962	-14.6673	0.02991
--	--	--	--	--	154.081	-0.0728	-0.1559	-0.23829	-0.43841	150.722	-2.25826	-6.77845	-14.6659	0.03425
--	--	--	--	--	154.181	-0.07325	-0.15561	-0.23877	-0.43758	150.822	-2.25715	-6.77719	-14.6645	0.03872
--	--	--	--	--	154.281	-0.07358	-0.15535	-0.2393	-0.43687	150.922	-2.25618	-6.77594	-14.663	0.04333
--	--	--	--	--	154.381	-0.07398	-0.15508	-0.23984	-0.43624	151.022	-2.25465	-6.7748	-14.6615	0.04811
--	--	--	--	--	154.481	-0.07438	-0.15477	-0.24038	-0.43559	151.122	-2.253	-6.77374	-14.6602	0.05289
--	--	--	--	--	154.581	-0.0747	-0.15445	-0.24095	-0.43483	151.222	-2.25175	-6.77275	-14.659	0.05738
--	--	--	--	--	154.681	-0.07505	-0.15412	-0.24155	-0.43402	151.322	-2.25053	-6.77181	-14.6578	0.06148
--	--	--	--	--	154.781	-0.0754	-0.15381	-0.24213	-0.43331	151.422	-2.24915	-6.7709	-14.6565	0.06525
--	--	--	--	--	154.881	-0.07571	-0.1535	-0.24263	-0.43265	151.522	-2.24811	-6.76999	-14.6551	0.06884
--	--	--	--	--	154.981	-0.07608	-0.1532	-0.24305	-0.43193	151.622	-2.24696	-6.76904	-14.6537	0.07247
--	--	--	--	--	155.081	-0.07659	-0.15289	-0.24348	-0.43109	151.722	-2.24559	-6.76799	-14.6525	0.07642
--	--	--	--	--	155.181	-0.07698	-0.15256	-0.24401	-0.43026	151.822	-2.24428	-6.76681	-14.6513	0.08076
--	--	--	--	--	155.281	-0.07737	-0.15221	-0.2446	-0.42952	151.922	-2.24296	-6.76559	-14.65	0.08534
--	--	--	--	--	155.381	-0.07777	-0.15186	-0.24516	-0.42881	152.022	-2.24172	-6.76445	-14.6486	0.08996
--	--	--	--	--	155.481	-0.0781	-0.15154	-0.24563	-0.42806	152.122	-2.2404	-6.76341	-14.6472	0.09439
--	--	--	--	--	155.581	-0.07843	-0.15123	-0.24604	-0.42729	152.222	-2.23893	-6.76243	-14.6458	0.09847
--	--	--	--	--	155.681	-0.07925	-0.15088	-0.24642	-0.42653	152.322	-2.23753	-6.7615	-14.6445	0.10241
--	--	--	--	--	155.781	-0.0796	-0.15049	-0.24681	-0.42583	152.422	-2.23611	-6.76054	-14.6433	0.10651
--	--	--	--	--	155.881	-0.07981	-0.15011	-0.24723	-0.42518	152.522	-2.23463	-6.7595	-14.6422	0.11085
--	--	--	--	--	155.981	-0.0802	-0.14977	-0.24769	-0.42455	152.622	-2.23331	-6.75842	-14.6411	0.11526
--	--	--	--	--	156.081	-0.08059	-0.14947	-0.24822	-0.42392	152.722	-2.23218	-6.75741	-14.64	0.11964
--	--	--	--	--	156.181	-0.08102	-0.14917	-0.24877	-0.42322	152.822	-2.23085	-6.75655	-14.6387	0.12391
--	--	--	--	--	156.281	-0.08165	-0.14886	-0.2493	-0.4225	152.922	-2.22904	-6.75573	-14.6373	0.12804
--	--	--	--	--	156.381	-0.0821	-0.14852	-0.24982	-0.42178	153.022	-2.2281	-6.75483	-14.6359	0.13204
--	--	--	--	--	156.481	-0.08237	-0.14818	-0.25042	-0.42109	153.122	-2.22605	-6.75376	-14.6346	0.13595
--	--	--	--	--	156.581	-0.08284	-0.14783	-0.25107	-0.42039	153.222	-2.2246	-6.75265	-14.6334	0.13981
--	--	--	--	--	156.681	-0.08336	-0.14749	-0.25163	-0.41967	153.322	-2.22375	-6.75164	-14.6321	0.14375
--	--	--	--	--	156.781	-0.08377	-0.14714	-0.25205	-0.41896	153.422	-2.22204	-6.75077	-14.6308	0.14782
--	--	--	--	--	156.881	-0.08412	-0.14678	-0.2524	-0.41831	153.522	-2.22089	-6.74997	-14.6294	0.15203
--	--	--	--	--	156.981	-0.08441	-0.1464	-0.25279	-0.41767	153.622	-2.2195	-6.74921	-14.6281	0.15636
--	--	--	--	--	157.081	-0.08475	-0.14602	-0.25326	-0.41704	153.722	-2.21815	-6.7484	-14.6268	0.16071
--	--	--	--	--	157.181	-0.08537	-0.14564	-0.25376	-0.41641	153.822	-2.21705	-6.74748	-14.6257	0.16495
--	--	--	--	--	157.281	-0.08572	-0.14526	-0.25422	-0.41579	153.922	-2.21547	-6.74641	-14.6248	0.16914
--	--	--	--	--	157.381	-0.08605	-0.1449	-0.25466	-0.4152	154.022	-2.21439	-6.74531	-14.6238	0.17353
--	--	--	--	--	157.481	-0.08642	-0.14455	-0.25507	-0.41463	154.122	-2.21299	-6.74435	-14.6228	0.17815
--	--	--	--	--	157.581	-0.08673	-0.1442	-0.25548	-0.41406	154.222	-2.21115	-6.74354	-14.6216	0.18247
--	--	--	--	--	157.681	-0.08711	-0.14384	-0.25588	-0.41349	154.322	-2.20986	-6.74278	-14.6203	0.1861
--	--	--	--	--	157.781	-0.08739	-0.14346	-0.25628	-0.41291	154.422	-2.2081	-6.74193	-14.619	0.1895
--	--	--	--	--	157.881	-0.08771	-0.14305	-0.25667	-0.41231	154.522	-2.20676	-6.74101	-14.6177	0.19333
--	--	--	--	--	157.981	-0.08816	-0.14264	-0.25705	-0.41168	154.622	-2.2055	-6.74007	-14.6164	0.19775
--	--	--	--	--	158.081	-0.08848	-0.14225	-0.25742	-0.41103	154.722	-2.20418	-6.73916	-14.615	0.20208
--	--	--	--	--	158.181	-0.08872	-0.14187	-0.25779	-0.41039	154.822	-2.20297	-6.73828	-14.6137	0.20587
--	--	--	--	--	158.281	-0.08907	-0.14151	-0.25816	-0.40981	154.922	-2.20186	-6.73743	-14.6126	0.20962
--	--	--	--	--	158.381	-0.0894	-0.14115	-0.25852	-0.40924	155.022	-2.20026	-6.73658	-14.6116	0.21399
--	--	--	--	--	158.481	-0.08966	-0.1408	-0.2589	-0.40863	155.122	-2.19859	-6.7357	-14.6106	0.21884
--	--	--	--	--	158.581	-0.08993	-0.14044	-0.25929	-0.40801	155.222	-2.1973	-6.73478	-14.6093	0.22339
--	--	--	--	--	158.681	-0.09013	-0.14005	-0.25969	-0.40743	155.322	-2.19595	-6.73384	-14.6079	0.22749
--	--	--	--	--	158.781	-0.09041	-0.13966	-0.26007	-0.40689	155.422	-2.19462	-6.73294	-14.6067	0.23163
--	--	--	--	--	158.881	-0.0907	-0.13926	-0.26041	-0.40634	155.522	-2.19365	-6.7321	-14.6057	0.23608
--	--	--	--	--	158.981	-0.09089	-0.13887	-0.26072	-0.40574	155.622	-2.19188	-6.73126	-14.6048	0.2406
--	--	--	--	--	159.081	-0.09114	-0.13849	-0.26101	-0.40513	155.722	-2.18942	-6.73032	-14.6039	0.2449
--	--	--	--	--	159.181	-0.09138	-0.13811	-0.26129	-0.40454	155.822	-2.18875	-6.72931	-14.603	0.24894
--	--	--	--	--	159.281	-0.09159	-0.13772	-0.26159	-0.40402	155.922	-2.18775	-6.72837	-14.602	0.25272
--	--	--	--	--	159.381	-0.09177	-0.13731	-0.26192	-0.40356	156.022	-2.18639	-6.72757	-14.6009	0.25644
--	--	--	--	--	159.481	-0.09193	-0.13684	-0.26228	-0.40313	156.122	-2.18508	-6.72684	-14.5996	0.26039
--	--	--	--	--	159.581	-0.09214	-0.13637	-0.26264	-0.40262	156.222	-2.18343	-6.7261	-14.5984	0.2647
--	--	--	--	--	159.681	-0.0923	-0.13592	-0.26294	-0.40201	156.322	-2.18124	-6.7253	-14.5972	0.26913
--	--	--	--	--	159.781	-0.09245	-0.13549	-0.26319	-0.40141	156.422	-2.18021	-6.72448	-14.596	0.27342
--	--	--	--	--	159.881	-0.09262	-0.13506	-0.26344	-0.40091	156.522	-2.17903	-6.72366	-14.5945	0.27768
--	--	--	--	--	159.981	-0.09273	-0.13463	-0.2637	-0.40046	156.622	-2.17724	-6.72285	-14.593	0.28212
--	--	--	--	--	160.081	-0.09289	-0.13421	-0.26397	-0.40003	156.722	-2.17557	-6.72203	-14.5919	0.28661
--	--	--	--	--	160.181	-0.09305	-0.13381	-0.2642	-0.39957	156.822	-2.17424	-6.72121	-14.591	0.29092
--	--	--	--	--	160.281	-0.09316	-0.13344	-0.2644	-0.39908	156.922	-2.1731	-6.72037	-14.5902	0.29502
--	--	--	--	--	160.381	-0.09327	-0.13306	-0.26459	-0.39856	157.022	-2.17211	-6.71951	-14.5892	0.29906
--	--	--	--	--	160.481	-0.09334	-0.13265	-0.26482	-0.39806	157.122	-2.17042	-6.71864	-14.588	0.30314
--	--	--	--	--	160.581	-0.09344	-0.13221	-0.2651	-0.3976	157.222	-2.16835	-6.71779	-14.5869	0.30718
--	--	--	--	--	160.681	-0.09352	-0.13179	-0.26537	-0.39716	157.322	-2.16729	-6.71699	-14.5858	0.31112
--	--	--	--	--	160.781	-0.09359	-0.13139	-0.26557	-0.39671	157.422	-2.16585	-6.71621	-14.5848	0.31495
--	--	--	--	--	160.881	-0.09368	-0.13098	-0.26575	-0.39623	157.522	-2.16458	-6.71545	-14.5839	0.31874
--	--	--	--	--	160.981	-0.09373	-0.13052	-0.26595	-0.39571	157.622	-2.16322	-6.71469	-14.5829	0.32251
--	--	--	--	--	161.081	-0.0938	-0.13003	-0.26619	-0.39517	157.722	-2.16179	-6.7139	-14.5819	0.32635
--	--	--	--	--	161.181	-0.09384	-0.12956	-0.26642	-0.39472	157.822	-2.16075	-6.71308	-14.581	0.33031
--	--	--	--	--	161.281	-0.09385	-0.12918	-0.2666	-0.39434	157.922	-2.15908	-6.71223	-14.58	0.33445
--	--	--	--	--	161.381	-0.09389	-0.12882	-0.26674	-0.39398	158.022	-2.15734	-6.71139	-14.5791	0.33886
--	--	--	--	--	161.481	-0.09391	-0.12842	-0.26685	-0.39357	158.122	-2.15616	-6.7106	-14.5782	0.34337
--	--	--	--	--	161.581	-0.09393	-0.12796	-0.26697	-0.39315	158.222	-2.15495	-6.70984	-14.5773	0.34764
--	--	--	--	--	161.681	-0.09395	-0.12746	-0.2671	-0.39274	158.322	-2.1532	-6.70912	-14.5764	0.35165
--	--	--	--	--	161.781	-0.09395	-0.12696	-0.26725	-0.39234	158.422	-2.15188	-6.70842	-14.5755	0.35576
--	--	--	--	--	161.881	-0.09395	-0.12649	-0.26741	-0.39194	158.522	-2.15052	-6.70772	-14.5745	0.36021
--	--	--	--	--	161.981	-0.09395	-0.1261	-0.26756	-0.39151	158.622	-2.1493	-6.70699	-14.5735	0.36464
--	--	--	--	--	162.081	-0.09395	-0.12575	-0.26768	-0.39111	158.722	-2.14822	-6.70623	-14.5725	0.3687
--	--	--	--	--	162.181	-0.09394	-0.12539	-0.26777	-0.39074	158.822	-2.14652	-6.70546	-14.5716	0.37264
--	--	--	--	--	162.281	-0.09393	-0.12497	-0.26786	-0.39041	158.922	-2.14522	-6.70471	-14.5707	0.37687
--	--	--	--	--	162.381	-0.09392	-0.12448	-0.26794	-0.39008	159.022	-2.14401	-6.70397	-14.5699	0.38142
--	--	--	--	--	162.481	-0.0939	-0.12401	-0.26802	-0.38972	159.122	-2.14248	-6.70325	-14.5691	0.38598
--	--	--	--	--	162.581	-0.09388	-0.1236	-0.2681	-0.38933	159.222	-2.14104	-6.70254	-14.5684	0.39029
--	--	--	--	--	162.681	-0.09387	-0.12323	-0.26817	-0.38888	159.322	-2.13972	-6.7018	-14.5676	0.39411
--	--	--	--	--	162.781	-0.09385	-0.12284	-0.26823	-0.38846	159.422	-2.13862	-6.70099	-14.5666	0.39748
--	--	--	--	--	162.881	-0.09383	-0.12242	-0.26828	-0.38811	159.522	-2.13734	-6.70012	-14.5655	0.40103
--	--	--	--	--	162.981	-0.0938	-0.12197	-0.26833	-0.38778	159.622	-2.13577	-6.69926	-14.5646	0.40543
--	--	--	--	--	163.081	-0.09378	-0.12152	-0.26837	-0.38747	159.722	-2.13464	-6.69847	-14.5638	0.41043
--	--	--	--	--	163.181	-0.09377	-0.12108	-0.2684	-0.38715	159.822	-2.13319	-6.69771	-14.5631	0.41496
--	--	--	--	--	163.281	-0.09375	-0.12066	-0.26842	-0.38683	159.922	-2.13197	-6.69694	-14.5623	0.41878
--	--	--	--	--	163.381	-0.09374	-0.12027	-0.26843	-0.38651	160.022	-2.13089	-6.69618	-14.5615	0.42236
--	--	--	--	--	163.481	-0.09373	-0.11988	-0.26844	-0.38618	160.122	-2.129	-6.69544	-14.5608	0.42607
--	--	--	--	--	163.581	-0.09371	-0.11951	-0.26844	-0.38585	160.222	-2.12756	-6.69478	-14.5601	0.43003
--	--	--	--	--	163.681	-0.0937	-0.11913	-0.26844	-0.38552	160.322	-2.12619	-6.69413	-14.5595	0.43429
--	--	--	--	--	163.781	-0.0937	-0.11873	-0.26842	-0.38519	160.422	-2.1251	-6.69345	-14.5588	0.43868
--	--	--	--	--	163.881	-0.0937	-0.1183	-0.2684	-0.38486	160.522	-2.12396	-6.69271	-14.558	0.44287
--	--	--	--	--	163.981	-0.0937	-0.11786	-0.26838	-0.38454	160.622	-2.12233	-6.69196	-14.5571	0.44682
--	--	--	--	--	164.081	-0.0937	-0.11744	-0.26835	-0.38423	160.722	-2.12128	-6.69125	-14.5562	0.45073
--	--	--	--	--	164.181	-0.09372	-0.11704	-0.26831	-0.38395	160.822	-2.11962	-6.69058	-14.5556	0.45483
--	--	--	--	--	164.281	-0.09373	-0.11665	-0.26827	-0.38369	160.922	-2.11823	-6.68986	-14.5549	0.45932
--	--	--	--	--	164.381	-0.09375	-0.11626	-0.26822	-0.38345	161.022	-2.11683	-6.68904	-14.5541	0.46426
--	--	--	--	--	164.481	-0.09378	-0.11585	-0.26817	-0.38322	161.122	-2.11503	-6.68821	-14.5532	0.469
--	--	--	--	--	164.581	-0.09381	-0.11544	-0.2681	-0.38298	161.222	-2.11428	-6.68749	-14.5523	0.47289
--	--	--	--	--	164.681	-0.09385	-0.11503	-0.26803	-0.38269	161.322	-2.11306	-6.68688	-14.5517	0.47634
--	--	--	--	--	164.781	-0.09388	-0.11463	-0.26796	-0.38239	161.422	-2.11185	-6.68626	-14.5511	0.47999
--	--	--	--	--	164.881	-0.09392	-0.11427	-0.26788	-0.38214	161.522	-2.11086	-6.68556	-14.5506	0.48406
--	--	--	--	--	164.981	-0.09397	-0.11392	-0.2678	-0.38192	161.622	-2.10883	-6.68476	-14.5501	0.4882
--	--	--	--	--	165.081	-0.09403	-0.11355	-0.26771	-0.38168	161.722	-2.10744	-6.68392	-14.5495	0.49218
--	--	--	--	--	165.181	-0.09408	-0.11315	-0.26761	-0.3814	161.822	-2.1062	-6.68311	-14.5487	0.49617
--	--	--	--	--	165.281	-0.09415	-0.11277	-0.2675	-0.38114	161.922	-2.10497	-6.68239	-14.5479	0.50042
--	--	--	--	--	165.381	-0.09421	-0.11243	-0.26739	-0.38093	162.022	-2.10372	-6.68177	-14.5472	0.50476
--	--	--	--	--	165.481	-0.09426	-0.11214	-0.26728	-0.38074	162.122	-2.10237	-6.68121	-14.5465	0.50883
--	--	--	--	--	165.581	-0.09436	-0.11185	-0.26718	-0.38054	162.222	-2.1012	-6.68059	-14.546	0.51256
--	--	--	--	--	165.681	-0.09445	-0.11153	-0.26706	-0.38033	162.322	-2.10001	-6.67984	-14.5455	0.51612
--	--	--	--	--	165.781	-0.09455	-0.11118	-0.26692	-0.3801	162.422	-2.09854	-6.67903	-14.5449	0.51977
--	--	--	--	--	165.881	-0.09464	-0.11083	-0.26677	-0.37986	162.522	-2.097	-6.6783	-14.5443	0.5238
--	--	--	--	--	165.981	-0.09472	-0.11051	-0.26663	-0.37965	162.622	-2.09582	-6.67767	-14.5437	0.52852
--	--	--	--	--	166.081	-0.09481	-0.11019	-0.2665	-0.37948	162.722	-2.09463	-6.67706	-14.5431	0.53355
--	--	--	--	--	166.181	-0.0949	-0.10985	-0.26638	-0.37931	162.822	-2.09323	-6.6764	-14.5425	0.53807
--	--	--	--	--	166.281	-0.095	-0.1095	-0.26625	-0.3791	162.922	-2.09168	-6.67569	-14.5419	0.54204
--	--	--	--	--	166.381	-0.09513	-0.10916	-0.26609	-0.37886	163.022	-2.09021	-6.67495	-14.5414	0.54581
--	--	--	--	--	166.481	-0.09522	-0.10885	-0.26592	-0.37866	163.122	-2.0889	-6.67422	-14.5409	0.5496
--	--	--	--	--	166.581	-0.0953	-0.10856	-0.26576	-0.3785	163.222	-2.08764	-6.67351	-14.5404	0.55347
--	--	--	--	--	166.681	-0.09541	-0.10826	-0.2656	-0.37835	163.322	-2.08656	-6.67284	-14.5399	0.55745
--	--	--	--	--	166.781	-0.0955	-0.10795	-0.26544	-0.37819	163.422	-2.0854	-6.6722	-14.5395	0.56154
--	--	--	--	--	166.881	-0.09558	-0.10765	-0.26526	-0.37802	163.522	-2.08401	-6.67157	-14.539	0.56571
--	--	--	--	--	166.981	-0.09569	-0.10737	-0.26507	-0.37784	163.622	-2.08271	-6.67095	-14.5385	0.56996
--	--	--	--	--	167.081	-0.09582	-0.10713	-0.26487	-0.37767	163.722	-2.08122	-6.67032	-14.5379	0.57431
--	--	--	--	--	167.181	-0.09594	-0.10689	-0.26467	-0.37753	163.822	-2.0798	-6.66963	-14.5373	0.57874
--	--	--	--	--	167.281	-0.09601	-0.10664	-0.26448	-0.37741	163.922	-2.07849	-6.6689	-14.5369	0.5832
--	--	--	--	--	167.381	-0.09609	-0.10637	-0.26429	-0.37727	164.022	-2.07714	-6.66817	-14.5365	0.58759
--	--	--	--	--	167.481	-0.0962	-0.10609	-0.2641	-0.37711	164.122	-2.07565	-6.66748	-14.5361	0.5918
--	--	--	--	--	167.581	-0.09628	-0.10582	-0.26389	-0.37695	164.222	-2.07403	-6.66682	-14.5357	0.59575
--	--	--	--	--	167.681	-0.09635	-0.10555	-0.26366	-0.37679	164.322	-2.0726	-6.66616	-14.5352	0.59941
--	--	--	--	--	167.781	-0.09647	-0.10529	-0.26344	-0.37666	164.422	-2.07108	-6.66549	-14.5348	0.60282
--	--	--	--	--	167.881	-0.09658	-0.10505	-0.26325	-0.37654	164.522	-2.06973	-6.6648	-14.5344	0.60629
--	--	--	--	--	167.981	-0.09664	-0.10482	-0.26308	-0.37642	164.622	-2.06833	-6.66409	-14.534	0.61028
--	--	--	--	--	168.081	-0.09673	-0.10459	-0.2629	-0.3763	164.722	-2.06686	-6.66338	-14.5336	0.61491
--	--	--	--	--	168.181	-0.09679	-0.10437	-0.2627	-0.37618	164.822	-2.06572	-6.66272	-14.5332	0.6194
--	--	--	--	--	168.281	-0.09687	-0.10414	-0.26247	-0.37606	164.922	-2.06462	-6.66211	-14.5328	0.62319
--	--	--	--	--	168.381	-0.09693	-0.1039	-0.26224	-0.37595	165.022	-2.06308	-6.66149	-14.5325	0.62688
--	--	--	--	--	168.481	-0.09697	-0.10368	-0.26201	-0.37584	165.122	-2.06166	-6.66082	-14.5321	0.63119
--	--	--	--	--	168.581	-0.09702	-0.10347	-0.2618	-0.37574	165.222	-2.06049	-6.6601	-14.5317	0.63587
--	--	--	--	--	168.681	-0.09704	-0.10329	-0.2616	-0.37564	165.322	-2.05887	-6.65944	-14.5314	0.64004
--	--	--	--	--	168.781	-0.09707	-0.10311	-0.26141	-0.37555	165.422	-2.05791	-6.65888	-14.531	0.64361
--	--	--	--	--	168.881	-0.0971	-0.10295	-0.2612	-0.37547	165.522	-2.05657	-6.65836	-14.5307	0.64706
--	--	--	--	--	168.981	-0.09711	-0.10277	-0.26097	-0.37538	165.622	-2.05476	-6.65782	-14.5304	0.65079
--	--	--	--	--	169.081	-0.09711	-0.10258	-0.26071	-0.37528	165.722	-2.05328	-6.6572	-14.5301	0.65496
--	--	--	--	--	169.181	-0.0971	-0.10237	-0.26046	-0.37519	165.822	-2.0517	-6.65655	-14.5297	0.65956
--	--	--	--	--	169.281	-0.09709	-0.10218	-0.26023	-0.3751	165.922	-2.05035	-6.65592	-14.5294	0.66409
--	--	--	--	--	169.381	-0.09707	-0.10202	-0.26002	-0.37503	166.022	-2.04915	-6.65532	-14.5291	0.66784
--	--	--	--	--	169.481	-0.09703	-0.10189	-0.25981	-0.37496	166.122	-2.04783	-6.6547	-14.5288	0.67115
--	--	--	--	--	169.581	-0.09699	-0.10177	-0.25961	-0.37489	166.222	-2.04647	-6.65404	-14.5286	0.67501
--	--	--	--	--	169.681	-0.09692	-0.10164	-0.2594	-0.37482	166.322	-2.04498	-6.65336	-14.5283	0.67995
--	--	--	--	--	169.781	-0.09683	-0.1015	-0.25919	-0.37474	166.422	-2.04326	-6.65271	-14.528	0.68487
--	--	--	--	--	169.881	-0.09674	-0.10135	-0.25896	-0.37467	166.522	-2.04229	-6.65212	-14.5277	0.68892
--	--	--	--	--	169.981	-0.09667	-0.1012	-0.25872	-0.37461	166.622	-2.04106	-6.65154	-14.5275	0.69247
--	--	--	--	--	170.081	-0.09661	-0.10107	-0.25845	-0.37456	166.722	-2.03966	-6.65092	-14.5273	0.69604
--	--	--	--	--	170.181	-0.0965	-0.10097	-0.25819	-0.3745	166.822	-2.03862	-6.65028	-14.527	0.69989
--	--	--	--	--	170.281	-0.09637	-0.10087	-0.25798	-0.37445	166.922	-2.03737	-6.64968	-14.5267	0.70416
--	--	--	--	--	170.381	-0.09621	-0.10078	-0.25781	-0.37439	167.022	-2.03584	-6.64914	-14.5265	0.70865
--	--	--	--	--	170.481	-0.09599	-0.10068	-0.25763	-0.37433	167.122	-2.03406	-6.64862	-14.5262	0.71274
--	--	--	--	--	170.581	-0.09582	-0.10059	-0.25741	-0.37429	167.222	-2.0327	-6.6481	-14.526	0.71622
--	--	--	--	--	170.681	-0.09569	-0.10051	-0.25715	-0.37424	167.322	-2.03187	-6.64753	-14.5258	0.71968
--	--	--	--	--	170.781	-0.09546	-0.10043	-0.2569	-0.3742	167.422	-2.03047	-6.64694	-14.5256	0.72372
--	--	--	--	--	170.881	-0.09515	-0.10036	-0.25669	-0.37416	167.522	-2.02905	-6.64632	-14.5254	0.7283
--	--	--	--	--	170.981	-0.09489	-0.1003	-0.2565	-0.37412	167.622	-2.02804	-6.64569	-14.5251	0.73302
--	--	--	--	--	171.081	-0.09465	-0.10024	-0.25633	-0.37408	167.722	-2.02679	-6.64507	-14.5249	0.73751
--	--	--	--	--	171.181	-0.09444	-0.10019	-0.25615	-0.37404	167.822	-2.02466	-6.64449	-14.5247	0.74151
--	--	--	--	--	171.281	-0.09425	-0.10015	-0.25597	-0.37401	167.922	-2.02347	-6.64392	-14.5245	0.74515
--	--	--	--	--	171.381	-0.09394	-0.10011	-0.25577	-0.37398	168.022	-2.022	-6.64336	-14.5244	0.74893
--	--	--	--	--	171.481	-0.09348	-0.10008	-0.25556	-0.37395	168.122	-2.02063	-6.64281	-14.5243	0.75313
--	--	--	--	--	171.581	-0.09315	-0.10006	-0.25537	-0.37392	168.222	-2.01939	-6.64223	-14.5241	0.75742
--	--	--	--	--	171.681	-0.09285	-0.10004	-0.2552	-0.3739	168.322	-2.01753	-6.64163	-14.5239	0.76148
--	--	--	--	--	171.781	-0.09248	-0.10002	-0.25504	-0.37387	168.422	-2.01637	-6.64101	-14.5237	0.76543
--	--	--	--	--	171.881	-0.09209	-0.10001	-0.25488	-0.37385	168.522	-2.01475	-6.64042	-14.5236	0.76953
--	--	--	--	--	171.981	-0.09168	-0.1	-0.25471	-0.37384	168.622	-2.01365	-6.63988	-14.5234	0.77366
--	--	--	--	--	172.081	-0.09122	-0.10001	-0.25453	-0.37382	168.722	-2.0127	-6.63936	-14.5233	0.77747
--	--	--	--	--	172.181	-0.09082	-0.10002	-0.25437	-0.3738	168.822	-2.01099	-6.63888	-14.5232	0.78095
--	--	--	--	--	172.281	-0.09045	-0.10004	-0.2542	-0.37379	168.922	-2.0093	-6.63839	-14.523	0.78457
--	--	--	--	--	172.381	-0.08996	-0.10006	-0.25403	-0.37377	169.022	-2.0083	-6.63784	-14.5229	0.78873
--	--	--	--	--	172.481	-0.08937	-0.10008	-0.25386	-0.37376	169.122	-2.00733	-6.6372	-14.5227	0.79319
--	--	--	--	--	172.581	-0.08896	-0.10011	-0.2537	-0.37375	169.222	-2.00605	-6.63653	-14.5226	0.79749
--	--	--	--	--	172.681	-0.08846	-0.10015	-0.25356	-0.37374	169.322	-2.00485	-6.63595	-14.5225	0.80148
--	--	--	--	--	172.781	-0.08775	-0.1002	-0.25344	-0.37374	169.422	-2.00339	-6.63546	-14.5224	0.80515
--	--	--	--	--	172.881	-0.08712	-0.10026	-0.25333	-0.37373	169.522	-2.00196	-6.63502	-14.5223	0.80868
--	--	--	--	--	172.981	-0.08661	-0.10031	-0.25321	-0.37373	169.622	-2.00068	-6.63456	-14.5222	0.8125
--	--	--	--	--	173.081	-0.08602	-0.10037	-0.2531	-0.37372	169.722	-1.9991	-6.63405	-14.5221	0.81685
--	--	--	--	--	173.181	-0.08545	-0.10044	-0.25299	-0.37372	169.822	-1.99743	-6.63349	-14.522	0.82127
--	--	--	--	--	173.281	-0.08452	-0.10053	-0.25289	-0.37372	169.922	-1.9962	-6.63286	-14.5219	0.82526
--	--	--	--	--	173.381	-0.08378	-0.10062	-0.2528	-0.37372	170.022	-1.99531	-6.63225	-14.5218	0.82895
--	--	--	--	--	173.481	-0.08316	-0.10071	-0.25271	-0.37373	170.122	-1.99436	-6.63172	-14.5217	0.83267
--	--	--	--	--	173.581	-0.08243	-0.10079	-0.25263	-0.37373	170.222	-1.99302	-6.63126	-14.5216	0.83661
--	--	--	--	--	173.681	-0.08171	-0.10088	-0.25255	-0.37374	170.322	-1.99166	-6.6308	-14.5215	0.84078
--	--	--	--	--	173.781	-0.08115	-0.10098	-0.25249	-0.37374	170.422	-1.98991	-6.6303	-14.5215	0.84511
--	--	--	--	--	173.881	-0.08045	-0.10109	-0.25245	-0.37375	170.522	-1.98822	-6.62977	-14.5214	0.84928
--	--	--	--	--	173.981	-0.07975	-0.10122	-0.2524	-0.37376	170.622	-1.9872	-6.62925	-14.5213	0.8531
--	--	--	--	--	174.081	-0.07906	-0.10135	-0.25237	-0.37377	170.722	-1.98615	-6.62875	-14.5213	0.85677
--	--	--	--	--	174.181	-0.0782	-0.10148	-0.25233	-0.37378	170.822	-1.98428	-6.62825	-14.5212	0.86054
--	--	--	--	--	174.281	-0.07751	-0.10162	-0.25231	-0.37379	170.922	-1.98262	-6.62775	-14.5211	0.86452
--	--	--	--	--	174.381	-0.07694	-0.10176	-0.25228	-0.3738	171.022	-1.98127	-6.62724	-14.5211	0.86871
--	--	--	--	--	174.481	-0.07622	-0.1019	-0.25227	-0.37381	171.122	-1.98013	-6.62674	-14.5211	0.87301
--	--	--	--	--	174.581	-0.07522	-0.10205	-0.25227	-0.37383	171.222	-1.97916	-6.62626	-14.521	0.8772
--	--	--	--	--	174.681	-0.07433	-0.1022	-0.25228	-0.37384	171.322	-1.97816	-6.62581	-14.521	0.88119
--	--	--	--	--	174.781	-0.07356	-0.10235	-0.2523	-0.37386	171.422	-1.9764	-6.6254	-14.5209	0.88518
--	--	--	--	--	174.881	-0.07296	-0.1025	-0.25233	-0.37388	171.522	-1.97471	-6.625	-14.5209	0.88932
--	--	--	--	--	174.981	-0.07228	-0.10266	-0.25236	-0.3739	171.622	-1.97353	-6.62458	-14.5208	0.8935
--	--	--	--	--	175.081	-0.07117	-0.10285	-0.2524	-0.37391	171.722	-1.97235	-6.62409	-14.5208	0.89755
--	--	--	--	--	175.181	-0.07031	-0.10307	-0.25245	-0.37393	171.822	-1.97096	-6.62355	-14.5208	0.90142
--	--	--	--	--	175.281	-0.06953	-0.10328	-0.25252	-0.37396	171.922	-1.96963	-6.62301	-14.5208	0.90513
--	--	--	--	--	175.381	-0.06859	-0.10348	-0.25259	-0.37398	172.022	-1.96821	-6.6225	-14.5207	0.90878
--	--	--	--	--	175.481	-0.06766	-0.10369	-0.25267	-0.374	172.122	-1.96681	-6.62202	-14.5207	0.91254
--	--	--	--	--	175.581	-0.06689	-0.10392	-0.25276	-0.37403	172.222	-1.96567	-6.62157	-14.5207	0.91652
--	--	--	--	--	175.681	-0.06613	-0.10415	-0.25285	-0.37405	172.322	-1.96453	-6.62113	-14.5207	0.92068
--	--	--	--	--	175.781	-0.06511	-0.10437	-0.25297	-0.37408	172.422	-1.96293	-6.62072	-14.5207	0.92494
--	--	--	--	--	175.881	-0.06431	-0.10456	-0.25311	-0.3741	172.522	-1.96153	-6.62033	-14.5207	0.92924
--	--	--	--	--	175.981	-0.0637	-0.10476	-0.25326	-0.37413	172.622	-1.96046	-6.61993	-14.5207	0.9335
--	--	--	--	--	176.081	-0.0629	-0.10499	-0.25341	-0.37416	172.722	-1.95895	-6.61949	-14.5207	0.93765
--	--	--	--	--	176.181	-0.06189	-0.10526	-0.25354	-0.37419	172.822	-1.95716	-6.61901	-14.5207	0.94156
--	--	--	--	--	176.281	-0.06126	-0.10552	-0.25369	-0.37422	172.922	-1.95587	-6.61854	-14.5207	0.94535
--	--	--	--	--	176.381	-0.06054	-0.10575	-0.25389	-0.37425	173.022	-1.9546	-6.61813	-14.5207	0.94925
--	--	--	--	--	176.481	-0.05976	-0.10598	-0.2541	-0.37428	173.122	-1.95331	-6.61774	-14.5207	0.95337
--	--	--	--	--	176.581	-0.05902	-0.10624	-0.2543	-0.37432	173.222	-1.95179	-6.61731	-14.5207	0.95761
--	--	--	--	--	176.681	-0.05833	-0.10654	-0.25448	-0.37435	173.322	-1.94976	-6.61684	-14.5207	0.9618
--	--	--	--	--	176.781	-0.05774	-0.10686	-0.25467	-0.37439	173.422	-1.94843	-6.61639	-14.5207	0.96572
--	--	--	--	--	176.881	-0.05719	-0.10716	-0.2549	-0.37442	173.522	-1.94709	-6.61601	-14.5208	0.96924
--	--	--	--	--	176.981	-0.05658	-0.10741	-0.25518	-0.37446	173.622	-1.94555	-6.61566	-14.5208	0.97273
--	--	--	--	--	177.081	-0.05591	-0.10764	-0.25546	-0.3745	173.722	-1.94429	-6.6153	-14.5208	0.97673
--	--	--	--	--	177.181	-0.05533	-0.10785	-0.25571	-0.37453	173.822	-1.94314	-6.61491	-14.5209	0.98121
--	--	--	--	--	177.281	-0.05457	-0.10809	-0.25596	-0.37456	173.922	-1.94169	-6.61449	-14.5209	0.98542
--	--	--	--	--	177.381	-0.05386	-0.10843	-0.25622	-0.3746	174.022	-1.94044	-6.61407	-14.5209	0.98909
--	--	--	--	--	177.481	-0.05337	-0.10885	-0.25653	-0.37464	174.122	-1.93898	-6.61365	-14.521	0.99279
--	--	--	--	--	177.581	-0.0528	-0.10925	-0.25684	-0.37469	174.222	-1.93746	-6.61325	-14.521	0.99691
--	--	--	--	--	177.681	-0.05213	-0.10954	-0.25713	-0.37473	174.322	-1.93633	-6.61287	-14.5211	1.00103
--	--	--	--	--	177.781	-0.05181	-0.10979	-0.25741	-0.37478	174.422	-1.93523	-6.6125	-14.5212	1.0046
--	--	--	--	--	177.881	-0.05133	-0.11004	-0.25771	-0.37482	174.522	-1.93368	-6.61213	-14.5212	1.00796
--	--	--	--	--	177.981	-0.05077	-0.11035	-0.25805	-0.37487	174.622	-1.9319	-6.61176	-14.5213	1.01178
--	--	--	--	--	178.081	-0.05037	-0.1107	-0.25843	-0.37491	174.722	-1.9304	-6.61141	-14.5213	1.01624
--	--	--	--	--	178.181	-0.05	-0.11108	-0.25883	-0.37496	174.822	-1.92913	-6.61108	-14.5214	1.02048
--	--	--	--	--	178.281	-0.04966	-0.11146	-0.25924	-0.375	174.922	-1.92812	-6.61076	-14.5215	1.02403
--	--	--	--	--	178.381	-0.04927	-0.11185	-0.25964	-0.37504	175.022	-1.92655	-6.6104	-14.5215	1.02742
--	--	--	--	--	178.481	-0.04892	-0.11223	-0.26002	-0.37509	175.122	-1.92464	-6.60999	-14.5216	1.03129
--	--	--	--	--	178.581	-0.04865	-0.1126	-0.26039	-0.37515	175.222	-1.92325	-6.60957	-14.5217	1.03554
--	--	--	--	--	178.681	-0.04822	-0.11294	-0.26077	-0.3752	175.322	-1.92175	-6.60919	-14.5218	1.03971
--	--	--	--	--	178.781	-0.04791	-0.11326	-0.26116	-0.37526	175.422	-1.91998	-6.60884	-14.5219	1.04366
--	--	--	--	--	178.881	-0.04768	-0.1136	-0.26158	-0.37531	175.522	-1.91842	-6.60848	-14.522	1.04754
--	--	--	--	--	178.981	-0.04748	-0.11396	-0.26206	-0.37537	175.622	-1.91709	-6.6081	-14.5221	1.05145
--	--	--	--	--	179.081	-0.04727	-0.11434	-0.26259	-0.37543	175.722	-1.91547	-6.60773	-14.5222	1.05542
--	--	--	--	--	179.181	-0.04707	-0.11474	-0.26311	-0.37548	175.822	-1.91364	-6.60742	-14.5223	1.05946
--	--	--	--	--	179.281	-0.04688	-0.11513	-0.26358	-0.37554	175.922	-1.91233	-6.60714	-14.5224	1.06353
--	--	--	--	--	179.381	-0.0467	-0.11555	-0.26401	-0.3756	176.022	-1.91114	-6.60684	-14.5226	1.06757
--	--	--	--	--	179.481	-0.04654	-0.11598	-0.26444	-0.37567	176.122	-1.90923	-6.60649	-14.5227	1.07155
--	--	--	--	--	179.581	-0.0464	-0.11643	-0.26492	-0.37573	176.222	-1.90757	-6.60612	-14.5228	1.07546
--	--	--	--	--	179.681	-0.04631	-0.11686	-0.26542	-0.3758	176.322	-1.90633	-6.60579	-14.5229	1.07937
--	--	--	--	--	179.781	-0.04625	-0.11727	-0.26595	-0.37586	176.422	-1.90472	-6.60551	-14.5231	1.08337
--	--	--	--	--	179.881	-0.04614	-0.11767	-0.26649	-0.37593	176.522	-1.90314	-6.60522	-14.5233	1.08748
--	--	--	--	--	179.981	-0.04608	-0.11809	-0.267	-0.37599	176.622	-1.90159	-6.60488	-14.5234	1.09153
--	--	--	--	--	180.081	-0.04606	-0.11852	-0.26749	-0.37605	176.722	-1.90017	-6.60451	-14.5235	1.0955
--	--	--	--	--	180.181	-0.04604	-0.11895	-0.26796	-0.37612	176.822	-1.8989	-6.60415	-14.5237	1.09959
--	--	--	--	--	180.281	-0.04603	-0.11939	-0.26848	-0.37619	176.922	-1.89761	-6.60385	-14.5238	1.10391
--	--	--	--	--	180.381	-0.04603	-0.11983	-0.26912	-0.37627	177.022	-1.89606	-6.60358	-14.5241	1.10805
--	--	--	--	--	180.481	-0.04604	-0.12026	-0.26981	-0.37634	177.122	-1.89453	-6.60336	-14.5242	1.11164
--	--	--	--	--	180.581	-0.04607	-0.12068	-0.27044	-0.37642	177.222	-1.89299	-6.60313	-14.5244	1.11493
--	--	--	--	--	180.681	-0.04612	-0.12109	-0.27098	-0.37649	177.322	-1.89085	-6.60285	-14.5246	1.1184
--	--	--	--	--	180.781	-0.04617	-0.1215	-0.27152	-0.37657	177.422	-1.88922	-6.60249	-14.5248	1.12227
--	--	--	--	--	180.881	-0.04621	-0.12193	-0.27214	-0.37665	177.522	-1.88788	-6.60207	-14.525	1.12643
--	--	--	--	--	180.981	-0.04628	-0.12246	-0.27284	-0.37673	177.622	-1.88587	-6.60174	-14.5252	1.13069
--	--	--	--	--	181.081	-0.04635	-0.12307	-0.27352	-0.37683	177.722	-1.88431	-6.6015	-14.5254	1.13489
--	--	--	--	--	181.181	-0.04641	-0.12364	-0.27411	-0.37692	177.822	-1.88327	-6.60129	-14.5256	1.13888
--	--	--	--	--	181.281	-0.04655	-0.12409	-0.27465	-0.37701	177.922	-1.88129	-6.60105	-14.5258	1.14275
--	--	--	--	--	181.381	-0.04663	-0.12449	-0.27519	-0.37709	178.022	-1.87958	-6.60077	-14.526	1.14662
--	--	--	--	--	181.481	-0.04668	-0.12488	-0.27577	-0.37717	178.122	-1.87814	-6.60046	-14.5263	1.15039
--	--	--	--	--	181.581	-0.04677	-0.12531	-0.27642	-0.37725	178.222	-1.87674	-6.60015	-14.5265	1.15385
--	--	--	--	--	181.681	-0.04694	-0.12576	-0.27714	-0.37733	178.322	-1.87528	-6.59984	-14.5268	1.15711
--	--	--	--	--	181.781	-0.04707	-0.12625	-0.27791	-0.37742	178.422	-1.8735	-6.59954	-14.527	1.16063
--	--	--	--	--	181.881	-0.04716	-0.12676	-0.27861	-0.37752	178.522	-1.87214	-6.59926	-14.5273	1.16484
--	--	--	--	--	181.981	-0.04728	-0.12726	-0.2792	-0.37762	178.622	-1.87047	-6.59899	-14.5275	1.16934
--	--	--	--	--	182.081	-0.04741	-0.12773	-0.27976	-0.37772	178.722	-1.86818	-6.59875	-14.5278	1.17346
--	--	--	--	--	182.181	-0.04752	-0.1282	-0.2804	-0.37781	178.822	-1.86657	-6.59852	-14.5281	1.17733
--	--	--	--	--	182.281	-0.04764	-0.12869	-0.28114	-0.37791	178.922	-1.86518	-6.59827	-14.5283	1.18136
--	--	--	--	--	182.381	-0.04776	-0.1292	-0.28193	-0.37801	179.022	-1.86375	-6.59802	-14.5287	1.18553
--	--	--	--	--	182.481	-0.04788	-0.12969	-0.28268	-0.37813	179.122	-1.86218	-6.59775	-14.529	1.18951
--	--	--	--	--	182.581	-0.04801	-0.13015	-0.28339	-0.37825	179.222	-1.86047	-6.59749	-14.5294	1.19326
--	--	--	--	--	182.681	-0.04817	-0.1306	-0.2841	-0.37836	179.322	-1.85871	-6.59722	-14.5297	1.1971
--	--	--	--	--	182.781	-0.04831	-0.1311	-0.28482	-0.37845	179.422	-1.85691	-6.59695	-14.5299	1.20123
--	--	--	--	--	182.881	-0.04847	-0.13167	-0.2855	-0.37854	179.522	-1.85486	-6.59668	-14.5302	1.20543
--	--	--	--	--	182.981	-0.04866	-0.13227	-0.2861	-0.37864	179.622	-1.85303	-6.5964	-14.5306	1.20946
--	--	--	--	--	183.081	-0.04876	-0.13284	-0.28668	-0.37876	179.722	-1.85194	-6.59615	-14.5309	1.21336
--	--	--	--	--	183.181	-0.04888	-0.13336	-0.28735	-0.37889	179.822	-1.85035	-6.59591	-14.5313	1.21721
--	--	--	--	--	183.281	-0.04904	-0.13386	-0.28819	-0.37903	179.922	-1.84734	-6.59567	-14.5316	1.22102
--	--	--	--	--	183.381	-0.04925	-0.13435	-0.28908	-0.37915	180.022	-1.84614	-6.59543	-14.532	1.2247
--	--	--	--	--	183.481	-0.04946	-0.13483	-0.28981	-0.37927	180.122	-1.84473	-6.59518	-14.5323	1.22834
--	--	--	--	--	183.581	-0.04963	-0.13531	-0.29041	-0.37937	180.222	-1.84299	-6.59494	-14.5326	1.23214
--	--	--	--	--	183.681	-0.04977	-0.13579	-0.29098	-0.37948	180.322	-1.84134	-6.5947	-14.533	1.23622
--	--	--	--	--	183.781	-0.04998	-0.13629	-0.29164	-0.37959	180.422	-1.83986	-6.59446	-14.5335	1.24038
--	--	--	--	--	183.881	-0.05019	-0.13681	-0.29236	-0.3797	180.522	-1.83836	-6.59424	-14.534	1.2444
--	--	--	--	--	183.981	-0.05035	-0.13736	-0.29306	-0.37982	180.622	-1.83595	-6.59402	-14.5344	1.24827
--	--	--	--	--	184.081	-0.05049	-0.13794	-0.2937	-0.37995	180.722	-1.83398	-6.59381	-14.5348	1.25204
--	--	--	--	--	184.181	-0.05065	-0.13852	-0.29433	-0.3801	180.822	-1.83277	-6.5936	-14.5352	1.25585
--	--	--	--	--	184.281	-0.05084	-0.13908	-0.29498	-0.38024	180.922	-1.83134	-6.59336	-14.5356	1.25989
--	--	--	--	--	184.381	-0.05101	-0.13959	-0.29568	-0.38037	181.022	-1.82926	-6.59308	-14.5361	1.26417
--	--	--	--	--	184.481	-0.05117	-0.14007	-0.29637	-0.38049	181.122	-1.82809	-6.59279	-14.5366	1.2685
--	--	--	--	--	184.581	-0.05137	-0.14053	-0.297	-0.38062	181.222	-1.82626	-6.59254	-14.537	1.27272
--	--	--	--	--	184.681	-0.05158	-0.14101	-0.29761	-0.38075	181.322	-1.82384	-6.59234	-14.5374	1.27669
--	--	--	--	--	184.781	-0.0518	-0.14153	-0.29825	-0.38089	181.422	-1.82279	-6.59216	-14.5379	1.28037
--	--	--	--	--	184.881	-0.05206	-0.14212	-0.29894	-0.38104	181.522	-1.82188	-6.59197	-14.5383	1.28391
--	--	--	--	--	184.981	-0.05235	-0.14277	-0.29964	-0.38118	181.622	-1.81976	-6.59177	-14.5388	1.28748
--	--	--	--	--	185.081	-0.0526	-0.14339	-0.30032	-0.38132	181.722	-1.81721	-6.59156	-14.5394	1.29119
--	--	--	--	--	185.181	-0.05289	-0.14394	-0.30095	-0.38145	181.822	-1.81573	-6.59134	-14.54	1.29513
--	--	--	--	--	185.281	-0.05311	-0.14444	-0.30155	-0.38158	181.922	-1.8144	-6.59111	-14.5405	1.29923
--	--	--	--	--	185.381	-0.05332	-0.14492	-0.30211	-0.38172	182.022	-1.81253	-6.5909	-14.5409	1.30327
--	--	--	--	--	185.481	-0.05355	-0.1454	-0.30269	-0.38186	182.122	-1.81095	-6.5907	-14.5414	1.30714
--	--	--	--	--	185.581	-0.05377	-0.14589	-0.30331	-0.38201	182.222	-1.80957	-6.5905	-14.5419	1.31093
--	--	--	--	--	185.681	-0.05409	-0.1464	-0.30397	-0.38215	182.322	-1.80791	-6.59029	-14.5426	1.31478
--	--	--	--	--	185.781	-0.0544	-0.14693	-0.3046	-0.3823	182.422	-1.80639	-6.59008	-14.5432	1.31887
--	--	--	--	--	185.881	-0.05465	-0.14745	-0.30517	-0.38245	182.522	-1.80491	-6.58988	-14.5438	1.32334
--	--	--	--	--	185.981	-0.05496	-0.14798	-0.30567	-0.38261	182.622	-1.80319	-6.5897	-14.5444	1.32777
--	--	--	--	--	186.081	-0.05533	-0.1485	-0.30614	-0.38276	182.722	-1.80132	-6.58951	-14.545	1.33156
--	--	--	--	--	186.181	-0.05557	-0.14904	-0.3066	-0.3829	182.822	-1.79975	-6.5893	-14.5456	1.33488
--	--	--	--	--	186.281	-0.05587	-0.14959	-0.30705	-0.38306	182.922	-1.79751	-6.58907	-14.5461	1.33829
--	--	--	--	--	186.381	-0.0562	-0.15016	-0.30751	-0.38323	183.022	-1.79587	-6.58884	-14.5466	1.34215
--	--	--	--	--	186.481	-0.05651	-0.15073	-0.30797	-0.38338	183.122	-1.7948	-6.58862	-14.5472	1.34648
--	--	--	--	--	186.581	-0.05686	-0.15129	-0.30845	-0.38352	183.222	-1.79335	-6.58843	-14.5478	1.35115
--	--	--	--	--	186.681	-0.0571	-0.1518	-0.30898	-0.38366	183.322	-1.79132	-6.58824	-14.5486	1.35565
--	--	--	--	--	186.781	-0.05736	-0.15228	-0.30955	-0.38382	183.422	-1.78907	-6.58806	-14.5494	1.35961
--	--	--	--	--	186.881	-0.05778	-0.15275	-0.31011	-0.38398	183.522	-1.78707	-6.58788	-14.55	1.36321
--	--	--	--	--	186.981	-0.05815	-0.15322	-0.3106	-0.38413	183.622	-1.78554	-6.5877	-14.5505	1.36673
--	--	--	--	--	187.081	-0.05843	-0.1537	-0.31103	-0.38428	183.722	-1.7839	-6.58752	-14.5511	1.37023
--	--	--	--	--	187.181	-0.05882	-0.15419	-0.31142	-0.38443	183.822	-1.78181	-6.58733	-14.5517	1.37372
--	--	--	--	--	187.281	-0.05922	-0.15466	-0.31179	-0.3846	183.922	-1.78001	-6.58714	-14.5524	1.37729
--	--	--	--	--	187.381	-0.05951	-0.15515	-0.31217	-0.38477	184.022	-1.77862	-6.58693	-14.5531	1.38121
--	--	--	--	--	187.481	-0.05979	-0.15564	-0.31259	-0.38494	184.122	-1.77732	-6.58673	-14.5537	1.38565
--	--	--	--	--	187.581	-0.06018	-0.15615	-0.31304	-0.38511	184.222	-1.77584	-6.58652	-14.5543	1.39017
--	--	--	--	--	187.681	-0.06049	-0.15666	-0.31345	-0.38527	184.322	-1.77417	-6.58633	-14.555	1.3943
--	--	--	--	--	187.781	-0.06082	-0.15717	-0.31377	-0.38542	184.422	-1.7728	-6.58615	-14.5557	1.39807
--	--	--	--	--	187.881	-0.0612	-0.15767	-0.31404	-0.38556	184.522	-1.77142	-6.58599	-14.5564	1.40168
--	--	--	--	--	187.981	-0.06146	-0.15817	-0.31435	-0.38569	184.622	-1.76972	-6.58582	-14.557	1.40535
--	--	--	--	--	188.081	-0.06182	-0.15865	-0.31472	-0.38584	184.722	-1.7681	-6.58565	-14.5577	1.40931
--	--	--	--	--	188.181	-0.06217	-0.15913	-0.31512	-0.38601	184.822	-1.76632	-6.58546	-14.5584	1.41357
--	--	--	--	--	188.281	-0.0625	-0.1596	-0.31545	-0.38618	184.922	-1.76418	-6.58525	-14.5592	1.41778
--	--	--	--	--	188.381	-0.06278	-0.16006	-0.31572	-0.38634	185.022	-1.76234	-6.58503	-14.5599	1.42172
--	--	--	--	--	188.481	-0.06295	-0.16052	-0.31596	-0.3865	185.122	-1.76046	-6.58482	-14.5607	1.42549
--	--	--	--	--	188.581	-0.06338	-0.16097	-0.3162	-0.38666	185.222	-1.75864	-6.58464	-14.5614	1.4292
--	--	--	--	--	188.681	-0.06366	-0.16144	-0.31643	-0.38682	185.322	-1.75735	-6.58448	-14.562	1.43295
--	--	--	--	--	188.781	-0.06386	-0.1619	-0.31667	-0.38697	185.422	-1.7559	-6.58431	-14.5627	1.4368
--	--	--	--	--	188.881	-0.06413	-0.16236	-0.3169	-0.38713	185.522	-1.75454	-6.58415	-14.5634	1.44073
--	--	--	--	--	188.981	-0.06432	-0.16279	-0.31714	-0.38731	185.622	-1.75302	-6.58398	-14.5642	1.44462
--	--	--	--	--	189.081	-0.06451	-0.16318	-0.31736	-0.38747	185.722	-1.75099	-6.58381	-14.565	1.44851
--	--	--	--	--	189.181	-0.06472	-0.16358	-0.31756	-0.38761	185.822	-1.74941	-6.58363	-14.5657	1.45258
--	--	--	--	--	189.281	-0.06491	-0.16401	-0.3177	-0.38775	185.922	-1.74793	-6.58345	-14.5664	1.45685
--	--	--	--	--	189.381	-0.06506	-0.16446	-0.31781	-0.3879	186.022	-1.74596	-6.58328	-14.5671	1.46096
--	--	--	--	--	189.481	-0.06519	-0.16489	-0.31789	-0.38806	186.122	-1.74425	-6.5831	-14.5677	1.46471
--	--	--	--	--	189.581	-0.06533	-0.16529	-0.31798	-0.38821	186.222	-1.74301	-6.58292	-14.5683	1.4685
--	--	--	--	--	189.681	-0.06542	-0.16568	-0.31808	-0.38835	186.322	-1.74129	-6.58273	-14.5689	1.47276
--	--	--	--	--	189.781	-0.06548	-0.16609	-0.31818	-0.38847	186.422	-1.73971	-6.58254	-14.5695	1.47712
--	--	--	--	--	189.881	-0.06554	-0.16652	-0.31825	-0.3886	186.522	-1.73802	-6.58235	-14.5702	1.48093
--	--	--	--	--	189.981	-0.06557	-0.16693	-0.3183	-0.38874	186.622	-1.73648	-6.58216	-14.5709	1.4844
--	--	--	--	--	190.081	-0.06557	-0.1673	-0.31833	-0.38888	186.722	-1.73545	-6.582	-14.5717	1.48814
--	--	--	--	--	190.181	-0.06556	-0.16765	-0.31836	-0.38903	186.822	-1.73381	-6.58184	-14.5726	1.49234
--	--	--	--	--	190.281	-0.0655	-0.16799	-0.31837	-0.38918	186.922	-1.73185	-6.58168	-14.5734	1.49645
--	--	--	--	--	190.381	-0.06542	-0.16833	-0.31836	-0.38934	187.022	-1.73033	-6.58152	-14.5741	1.50018
--	--	--	--	--	190.481	-0.06535	-0.1687	-0.31834	-0.38948	187.122	-1.72891	-6.58135	-14.5748	1.50387
--	--	--	--	--	190.581	-0.06518	-0.16908	-0.3183	-0.3896	187.222	-1.7269	-6.58119	-14.5754	1.50791
--	--	--	--	--	190.681	-0.06504	-0.16947	-0.31825	-0.38971	187.322	-1.72531	-6.58102	-14.5761	1.51222
--	--	--	--	--	190.781	-0.06485	-0.16983	-0.31818	-0.38983	187.422	-1.72408	-6.58086	-14.5767	1.51657
--	--	--	--	--	190.881	-0.06459	-0.17016	-0.31809	-0.38996	187.522	-1.72258	-6.58068	-14.5775	1.52086
--	--	--	--	--	190.981	-0.06435	-0.17047	-0.318	-0.39011	187.622	-1.72078	-6.58051	-14.5783	1.52506
--	--	--	--	--	191.081	-0.06406	-0.1708	-0.31789	-0.39027	187.722	-1.71947	-6.58033	-14.579	1.52904
--	--	--	--	--	191.181	-0.06382	-0.17112	-0.31776	-0.39039	187.822	-1.71767	-6.58015	-14.5796	1.53264
--	--	--	--	--	191.281	-0.06353	-0.17144	-0.31762	-0.3905	187.922	-1.71616	-6.57998	-14.5802	1.53599
--	--	--	--	--	191.381	-0.06314	-0.17173	-0.31747	-0.39061	188.022	-1.71482	-6.5798	-14.5809	1.53952
--	--	--	--	--	191.481	-0.06274	-0.17201	-0.31732	-0.39074	188.122	-1.71287	-6.57963	-14.5817	1.54356
--	--	--	--	--	191.581	-0.06236	-0.17228	-0.31715	-0.39088	188.222	-1.71129	-6.57946	-14.5826	1.54783
--	--	--	--	--	191.681	-0.06195	-0.17256	-0.31698	-0.39102	188.322	-1.70953	-6.57929	-14.5833	1.55195
--	--	--	--	--	191.781	-0.06146	-0.17283	-0.31679	-0.39115	188.422	-1.7085	-6.57913	-14.584	1.55597
--	--	--	--	--	191.881	-0.06091	-0.17308	-0.31658	-0.39126	188.522	-1.70712	-6.57896	-14.5846	1.56007
--	--	--	--	--	191.981	-0.0604	-0.17333	-0.31633	-0.39137	188.622	-1.7046	-6.57879	-14.5852	1.56418
--	--	--	--	--	192.081	-0.05986	-0.17358	-0.31605	-0.39147	188.722	-1.70341	-6.57862	-14.5859	1.56818
--	--	--	--	--	192.181	-0.05926	-0.17385	-0.31577	-0.39157	188.822	-1.70186	-6.57844	-14.5866	1.57215
--	--	--	--	--	192.281	-0.05884	-0.17413	-0.3155	-0.39167	188.922	-1.70031	-6.57827	-14.5874	1.57639
--	--	--	--	--	192.381	-0.05816	-0.17439	-0.31524	-0.39178	189.022	-1.69899	-6.57812	-14.5882	1.58083
--	--	--	--	--	192.481	-0.05724	-0.17463	-0.31497	-0.39188	189.122	-1.69752	-6.57796	-14.589	1.58488
--	--	--	--	--	192.581	-0.05685	-0.17485	-0.31469	-0.39197	189.222	-1.69577	-6.5778	-14.5898	1.58843
--	--	--	--	--	192.681	-0.05624	-0.17506	-0.3144	-0.39206	189.322	-1.69422	-6.57763	-14.5903	1.59207
--	--	--	--	--	192.781	-0.05561	-0.17526	-0.31408	-0.39214	189.422	-1.6928	-6.57745	-14.5908	1.59624
--	--	--	--	--	192.881	-0.05509	-0.17546	-0.31373	-0.39223	189.522	-1.69116	-6.57728	-14.5913	1.6005
--	--	--	--	--	192.981	-0.0544	-0.17566	-0.31334	-0.39233	189.622	-1.68943	-6.57712	-14.5919	1.60427
--	--	--	--	--	193.081	-0.05347	-0.17585	-0.31291	-0.39242	189.722	-1.68813	-6.57696	-14.5926	1.60768
--	--	--	--	--	193.181	-0.05286	-0.17602	-0.3125	-0.39251	189.822	-1.68649	-6.57678	-14.5933	1.61111
--	--	--	--	--	193.281	-0.05228	-0.17618	-0.31213	-0.39258	189.922	-1.68509	-6.5766	-14.5939	1.61474
--	--	--	--	--	193.381	-0.05146	-0.17635	-0.31178	-0.39268	190.022	-1.68379	-6.57643	-14.5945	1.61854
--	--	--	--	--	193.481	-0.05082	-0.17651	-0.31142	-0.39278	190.122	-1.68181	-6.57628	-14.5951	1.62247
--	--	--	--	--	193.581	-0.04974	-0.17666	-0.311	-0.39286	190.222	-1.68046	-6.57612	-14.5957	1.62661
--	--	--	--	--	193.681	-0.04894	-0.17679	-0.31054	-0.39292	190.322	-1.67864	-6.57597	-14.5963	1.63102
--	--	--	--	--	193.781	-0.0483	-0.17691	-0.31009	-0.39298	190.422	-1.67724	-6.57581	-14.5969	1.63533
--	--	--	--	--	193.881	-0.0475	-0.17702	-0.30964	-0.39305	190.522	-1.67594	-6.57564	-14.5976	1.63911
--	--	--	--	--	193.981	-0.04668	-0.17713	-0.30922	-0.39312	190.622	-1.67384	-6.57546	-14.5982	1.6425
--	--	--	--	--	194.081	-0.04609	-0.17723	-0.3088	-0.39318	190.722	-1.67264	-6.57527	-14.5989	1.64585
--	--	--	--	--	194.181	-0.04543	-0.17733	-0.30837	-0.39324	190.822	-1.67076	-6.5751	-14.5995	1.64949
--	--	--	--	--	194.281	-0.0446	-0.17742	-0.30789	-0.3933	190.922	-1.66906	-6.57494	-14.6001	1.65364
--	--	--	--	--	194.381	-0.04377	-0.17751	-0.30735	-0.39335	191.022	-1.66754	-6.57478	-14.6007	1.65831
--	--	--	--	--	194.481	-0.04308	-0.17759	-0.30678	-0.3934	191.122	-1.66602	-6.57461	-14.6012	1.66269
--	--	--	--	--	194.581	-0.0424	-0.17766	-0.30625	-0.39345	191.222	-1.6648	-6.57444	-14.6018	1.66622
--	--	--	--	--	194.681	-0.04179	-0.17771	-0.30576	-0.39349	191.322	-1.66323	-6.57428	-14.6024	1.66949
--	--	--	--	--	194.781	-0.04101	-0.17776	-0.30529	-0.39354	191.422	-1.66151	-6.57412	-14.6029	1.67329
--	--	--	--	--	194.881	-0.04016	-0.1778	-0.30479	-0.39358	191.522	-1.65996	-6.57397	-14.6034	1.67772
--	--	--	--	--	194.981	-0.03953	-0.17783	-0.30426	-0.39362	191.622	-1.65852	-6.57381	-14.6039	1.68239
--	--	--	--	--	195.081	-0.03885	-0.17785	-0.30371	-0.39365	191.722	-1.65698	-6.57365	-14.6044	1.68696
--	--	--	--	--	195.181	-0.03844	-0.17787	-0.30315	-0.39368	191.822	-1.65523	-6.57349	-14.605	1.69124
--	--	--	--	--	195.281	-0.03796	-0.17787	-0.3026	-0.39371	191.922	-1.65355	-6.57334	-14.6055	1.6952
--	--	--	--	--	195.381	-0.03717	-0.17787	-0.30207	-0.39373	192.022	-1.65201	-6.57318	-14.6061	1.69889
--	--	--	--	--	195.481	-0.03664	-0.17786	-0.30154	-0.39376	192.122	-1.65038	-6.57301	-14.6067	1.70248
--	--	--	--	--	195.581	-0.03618	-0.17785	-0.30095	-0.39378	192.222	-1.64884	-6.57282	-14.6073	1.70617
--	--	--	--	--	195.681	-0.03544	-0.17782	-0.30026	-0.39381	192.322	-1.64774	-6.57263	-14.6078	1.71012
--	--	--	--	--	195.781	-0.03483	-0.17778	-0.29956	-0.39382	192.422	-1.64529	-6.57246	-14.6083	1.71411
--	--	--	--	--	195.881	-0.03445	-0.17774	-0.29897	-0.39384	192.522	-1.64369	-6.57228	-14.6087	1.71794
--	--	--	--	--	195.981	-0.03403	-0.1777	-0.29849	-0.39385	192.622	-1.6427	-6.57212	-14.6092	1.72158
--	--	--	--	--	196.081	-0.03367	-0.17764	-0.29802	-0.39386	192.722	-1.64104	-6.57196	-14.6097	1.72507
--	--	--	--	--	196.181	-0.03317	-0.17758	-0.29749	-0.39387	192.822	-1.63975	-6.5718	-14.6102	1.72862
--	--	--	--	--	196.281	-0.03277	-0.1775	-0.29687	-0.39387	192.922	-1.63847	-6.57162	-14.6107	1.73255
--	--	--	--	--	196.381	-0.03253	-0.17741	-0.29621	-0.39387	193.022	-1.63663	-6.57145	-14.6113	1.73692
--	--	--	--	--	196.481	-0.03221	-0.17732	-0.29554	-0.39387	193.122	-1.63471	-6.57128	-14.6119	1.7411
--	--	--	--	--	196.581	-0.03191	-0.17722	-0.29488	-0.39387	193.222	-1.6336	-6.57112	-14.6124	1.74472
--	--	--	--	--	196.681	-0.03162	-0.17711	-0.29425	-0.39386	193.322	-1.63202	-6.57095	-14.6129	1.7487
--	--	--	--	--	196.781	-0.03136	-0.17701	-0.29364	-0.39386	193.422	-1.63044	-6.57078	-14.6133	1.75388
--	--	--	--	--	196.881	-0.03114	-0.17689	-0.29304	-0.39385	193.522	-1.6288	-6.5706	-14.6137	1.75896
--	--	--	--	--	196.981	-0.03087	-0.17677	-0.29244	-0.39384	193.622	-1.62647	-6.57044	-14.6143	1.76267
--	--	--	--	--	197.081	-0.0307	-0.17663	-0.29185	-0.39382	193.722	-1.62507	-6.57028	-14.6148	1.76585
--	--	--	--	--	197.181	-0.03061	-0.17649	-0.29128	-0.39381	193.822	-1.62358	-6.57012	-14.6153	1.76954
--	--	--	--	--	197.281	-0.03049	-0.17636	-0.29073	-0.39379	193.922	-1.62176	-6.56997	-14.6158	1.77374
--	--	--	--	--	197.381	-0.03036	-0.17621	-0.29014	-0.39377	194.022	-1.62021	-6.56981	-14.6162	1.77791
--	--	--	--	--	197.481	-0.03032	-0.17602	-0.28949	-0.39375	194.122	-1.61895	-6.56965	-14.6166	1.78189
--	--	--	--	--	197.581	-0.0303	-0.17582	-0.28878	-0.39373	194.222	-1.61734	-6.56948	-14.6171	1.78582
--	--	--	--	--	197.681	-0.0303	-0.17563	-0.28808	-0.3937	194.322	-1.61542	-6.56931	-14.6176	1.78978
--	--	--	--	--	197.781	-0.03033	-0.17547	-0.28745	-0.39368	194.422	-1.61372	-6.56913	-14.6181	1.7937
--	--	--	--	--	197.881	-0.03037	-0.17532	-0.28687	-0.39365	194.522	-1.61217	-6.56895	-14.6187	1.79756
--	--	--	--	--	197.981	-0.03044	-0.17514	-0.2863	-0.39362	194.622	-1.61064	-6.56878	-14.6192	1.80144
--	--	--	--	--	198.081	-0.03052	-0.17492	-0.28573	-0.39359	194.722	-1.60917	-6.56862	-14.6196	1.8054
--	--	--	--	--	198.181	-0.03066	-0.17468	-0.28512	-0.39355	194.822	-1.60703	-6.56847	-14.6201	1.80947
--	--	--	--	--	198.281	-0.03083	-0.17444	-0.28446	-0.39351	194.922	-1.60525	-6.56832	-14.6205	1.81366
--	--	--	--	--	198.381	-0.031	-0.17421	-0.28378	-0.39347	195.022	-1.60353	-6.56816	-14.621	1.81771
--	--	--	--	--	198.481	-0.03118	-0.17396	-0.28314	-0.39343	195.122	-1.60201	-6.568	-14.6215	1.82132
--	--	--	--	--	198.581	-0.03135	-0.1737	-0.28257	-0.39339	195.222	-1.60104	-6.56782	-14.622	1.82464
--	--	--	--	--	198.681	-0.03167	-0.17345	-0.28201	-0.39334	195.322	-1.59921	-6.56764	-14.6225	1.82808
--	--	--	--	--	198.781	-0.03199	-0.1732	-0.28139	-0.39329	195.422	-1.59717	-6.56747	-14.623	1.83195
--	--	--	--	--	198.881	-0.0322	-0.17296	-0.28072	-0.39325	195.522	-1.5958	-6.56731	-14.6234	1.83615
--	--	--	--	--	198.981	-0.03245	-0.17271	-0.28007	-0.39321	195.622	-1.59412	-6.56715	-14.624	1.84051
--	--	--	--	--	199.081	-0.03284	-0.17243	-0.27946	-0.39317	195.722	-1.59152	-6.56698	-14.6246	1.84465
--	--	--	--	--	199.181	-0.03324	-0.17214	-0.27889	-0.39311	195.822	-1.58996	-6.56682	-14.6252	1.84829
--	--	--	--	--	199.281	-0.03354	-0.17188	-0.2783	-0.39306	195.922	-1.58845	-6.56667	-14.6256	1.85173
--	--	--	--	--	199.381	-0.03397	-0.17163	-0.2777	-0.393	196.022	-1.58696	-6.56653	-14.626	1.85543
--	--	--	--	--	199.481	-0.03453	-0.17135	-0.27708	-0.39295	196.122	-1.58536	-6.56639	-14.6264	1.85945
--	--	--	--	--	199.581	-0.03481	-0.17099	-0.27644	-0.3929	196.222	-1.58312	-6.56623	-14.6269	1.86349
--	--	--	--	--	199.681	-0.03526	-0.17058	-0.27582	-0.39285	196.322	-1.58172	-6.56606	-14.6275	1.8675
--	--	--	--	--	199.781	-0.03577	-0.17022	-0.27524	-0.39279	196.422	-1.58037	-6.5659	-14.628	1.8718
--	--	--	--	--	199.881	-0.03631	-0.16992	-0.2747	-0.39273	196.522	-1.57863	-6.56573	-14.6286	1.87643
--	--	--	--	--	199.981	-0.03689	-0.16963	-0.27418	-0.39267	196.622	-1.57696	-6.56558	-14.6292	1.88083
--	--	--	--	--	200.081	-0.03731	-0.16931	-0.27366	-0.39262	196.722	-1.57507	-6.56543	-14.6297	1.88473
--	--	--	--	--	200.181	-0.03779	-0.16896	-0.27312	-0.39257	196.822	-1.57343	-6.56529	-14.6302	1.88844
--	--	--	--	--	200.281	-0.03846	-0.16858	-0.27254	-0.39251	196.922	-1.57144	-6.56515	-14.6308	1.89226
--	--	--	--	--	200.381	-0.03908	-0.16819	-0.27192	-0.39245	197.022	-1.56906	-6.565	-14.6313	1.89612
--	--	--	--	--	200.481	-0.03966	-0.1678	-0.2713	-0.3924	197.122	-1.56755	-6.56485	-14.6318	1.89995
--	--	--	--	--	200.581	-0.04038	-0.16743	-0.27071	-0.39234	197.222	-1.56636	-6.56471	-14.6323	1.90374
--	--	--	--	--	200.681	-0.04091	-0.16707	-0.27016	-0.39229	197.322	-1.56368	-6.56457	-14.6328	1.90751
--	--	--	--	--	200.781	-0.0416	-0.16671	-0.26965	-0.39223	197.422	-1.56164	-6.56443	-14.6333	1.91127
--	--	--	--	--	200.881	-0.04228	-0.16635	-0.26914	-0.39218	197.522	-1.56013	-6.56426	-14.6339	1.91504
--	--	--	--	--	200.981	-0.04293	-0.16598	-0.26865	-0.39213	197.622	-1.55841	-6.56409	-14.6346	1.9188
--	--	--	--	--	201.081	-0.04365	-0.1656	-0.26816	-0.39207	197.722	-1.55666	-6.56395	-14.6352	1.92246
--	--	--	--	--	201.181	-0.04431	-0.16521	-0.26769	-0.39201	197.822	-1.55477	-6.56384	-14.6357	1.92599
--	--	--	--	--	201.281	-0.04496	-0.1648	-0.26721	-0.39195	197.922	-1.55313	-6.56372	-14.6363	1.92955
--	--	--	--	--	201.381	-0.04564	-0.16436	-0.26671	-0.39189	198.022	-1.55168	-6.56359	-14.6368	1.93337
--	--	--	--	--	201.481	-0.04629	-0.16391	-0.26619	-0.39183	198.122	-1.54994	-6.56344	-14.6373	1.9375
--	--	--	--	--	201.581	-0.04695	-0.16346	-0.26565	-0.39177	198.222	-1.54764	-6.56328	-14.6379	1.94193
--	--	--	--	--	201.681	-0.04792	-0.16303	-0.26511	-0.39172	198.322	-1.54572	-6.56314	-14.6386	1.9464
--	--	--	--	--	201.781	-0.04885	-0.16262	-0.26457	-0.39167	198.422	-1.54397	-6.563	-14.6393	1.95051
--	--	--	--	--	201.881	-0.04964	-0.16223	-0.26407	-0.39162	198.522	-1.54242	-6.56286	-14.6398	1.9543
--	--	--	--	--	201.981	-0.05024	-0.16183	-0.26358	-0.39157	198.622	-1.54072	-6.56272	-14.6404	1.95824
--	--	--	--	--	202.081	-0.05097	-0.16142	-0.26311	-0.39151	198.722	-1.53808	-6.56259	-14.641	1.96244
--	--	--	--	--	202.181	-0.05211	-0.16097	-0.26262	-0.39146	198.822	-1.53639	-6.56247	-14.6416	1.96638
--	--	--	--	--	202.281	-0.05271	-0.1605	-0.26213	-0.39142	198.922	-1.53507	-6.56235	-14.6423	1.96981
--	--	--	--	--	202.381	-0.05332	-0.16003	-0.26165	-0.39138	199.022	-1.53328	-6.56223	-14.643	1.97328
--	--	--	--	--	202.481	-0.05438	-0.15955	-0.2612	-0.39133	199.122	-1.53098	-6.5621	-14.6436	1.97731
--	--	--	--	--	202.581	-0.0554	-0.15905	-0.26076	-0.39129	199.222	-1.52913	-6.56197	-14.6442	1.98176
--	--	--	--	--	202.681	-0.0561	-0.15853	-0.26034	-0.39124	199.322	-1.5276	-6.56187	-14.6449	1.98615
--	--	--	--	--	202.781	-0.05707	-0.15803	-0.25993	-0.3912	199.422	-1.52504	-6.56176	-14.6456	1.99024
--	--	--	--	--	202.881	-0.05783	-0.15756	-0.2595	-0.39116	199.522	-1.52315	-6.56164	-14.6463	1.99397
--	--	--	--	--	202.981	-0.0585	-0.15713	-0.25907	-0.39112	199.622	-1.52192	-6.56149	-14.647	1.99765
--	--	--	--	--	203.081	-0.05934	-0.1567	-0.25865	-0.39108	199.722	-1.51972	-6.56134	-14.6477	2.0018
--	--	--	--	--	203.181	-0.0602	-0.15626	-0.25825	-0.39104	199.822	-1.51782	-6.56122	-14.6483	2.00637
--	--	--	--	--	203.281	-0.06118	-0.15579	-0.25788	-0.39101	199.922	-1.51555	-6.56112	-14.6489	2.01057
--	--	--	--	--	203.381	-0.06218	-0.15528	-0.25752	-0.39098	200.022	-1.5137	-6.56102	-14.6496	2.01419
--	--	--	--	--	203.481	-0.06321	-0.15475	-0.25715	-0.39095	200.122	-1.51224	-6.56091	-14.6502	2.01779
--	--	--	--	--	203.581	-0.06408	-0.15424	-0.25676	-0.39092	200.222	-1.51029	-6.5608	-14.6509	2.02174
--	--	--	--	--	203.681	-0.06479	-0.15377	-0.25636	-0.3909	200.322	-1.50796	-6.56068	-14.6516	2.02578
--	--	--	--	--	203.781	-0.06565	-0.15329	-0.25595	-0.39087	200.422	-1.50617	-6.56056	-14.6524	2.02961
--	--	--	--	--	203.881	-0.06633	-0.15277	-0.25554	-0.39085	200.522	-1.50402	-6.56045	-14.6532	2.03332
--	--	--	--	--	203.981	-0.06725	-0.15222	-0.25516	-0.39083	200.622	-1.50206	-6.56035	-14.654	2.03712
--	--	--	--	--	204.081	-0.06846	-0.15168	-0.25481	-0.39082	200.722	-1.50036	-6.56025	-14.6547	2.04099
--	--	--	--	--	204.181	-0.06927	-0.15119	-0.25447	-0.39081	200.822	-1.49821	-6.56016	-14.6554	2.04473
--	--	--	--	--	204.281	-0.06994	-0.15072	-0.25411	-0.3908	200.922	-1.49637	-6.56007	-14.656	2.04833
--	--	--	--	--	204.381	-0.07068	-0.15026	-0.25377	-0.39079	201.022	-1.49441	-6.55998	-14.6567	2.052
--	--	--	--	--	204.481	-0.07148	-0.14979	-0.25344	-0.39079	201.122	-1.49247	-6.55989	-14.6574	2.05591
--	--	--	--	--	204.581	-0.07224	-0.14927	-0.25314	-0.39078	201.222	-1.4907	-6.55979	-14.6581	2.0601
--	--	--	--	--	204.681	-0.07298	-0.14871	-0.25284	-0.39078	201.322	-1.48893	-6.5597	-14.6588	2.06451
--	--	--	--	--	204.781	-0.07379	-0.14815	-0.2525	-0.39079	201.422	-1.48712	-6.55961	-14.6595	2.06899
--	--	--	--	--	204.881	-0.0749	-0.14763	-0.25215	-0.39079	201.522	-1.48548	-6.55951	-14.6603	2.07333
--	--	--	--	--	204.981	-0.07569	-0.14717	-0.25181	-0.3908	201.622	-1.4835	-6.55942	-14.6611	2.07734
--	--	--	--	--	205.081	-0.07613	-0.1467	-0.25151	-0.39082	201.722	-1.48094	-6.55934	-14.662	2.08088
--	--	--	--	--	205.181	-0.07669	-0.14615	-0.25123	-0.39083	201.822	-1.4788	-6.55927	-14.6628	2.08437
--	--	--	--	--	205.281	-0.07768	-0.14555	-0.25097	-0.39085	201.922	-1.47704	-6.5592	-14.6636	2.08842
--	--	--	--	--	205.381	-0.07836	-0.14497	-0.25073	-0.39086	202.022	-1.47564	-6.55913	-14.6644	2.093
--	--	--	--	--	205.481	-0.07895	-0.14443	-0.25048	-0.39088	202.122	-1.47334	-6.55906	-14.6652	2.09729
--	--	--	--	--	205.581	-0.07977	-0.14392	-0.25021	-0.39091	202.222	-1.47103	-6.55899	-14.6661	2.10097
--	--	--	--	--	205.681	-0.08037	-0.1434	-0.24993	-0.39094	202.322	-1.46987	-6.55891	-14.6669	2.10439
--	--	--	--	--	205.781	-0.0812	-0.14287	-0.24963	-0.39098	202.422	-1.46802	-6.55884	-14.6677	2.10791
--	--	--	--	--	205.881	-0.08178	-0.14232	-0.24932	-0.39101	202.522	-1.46534	-6.55877	-14.6685	2.11173
--	--	--	--	--	205.981	-0.08239	-0.14175	-0.24904	-0.39104	202.622	-1.46346	-6.55871	-14.6693	2.11596
--	--	--	--	--	206.081	-0.08306	-0.14118	-0.2488	-0.39109	202.722	-1.46167	-6.55864	-14.6701	2.12035
--	--	--	--	--	206.181	-0.08361	-0.14064	-0.2486	-0.39115	202.822	-1.45952	-6.55858	-14.6709	2.12444
--	--	--	--	--	206.281	-0.08413	-0.14013	-0.24839	-0.3912	202.922	-1.45803	-6.55853	-14.6717	2.12832
--	--	--	--	--	206.381	-0.08452	-0.13963	-0.24816	-0.39124	203.022	-1.45634	-6.55848	-14.6726	2.13237
--	--	--	--	--	206.481	-0.08494	-0.13913	-0.24793	-0.39129	203.122	-1.45444	-6.55844	-14.6734	2.13665
--	--	--	--	--	206.581	-0.08545	-0.13863	-0.24771	-0.39135	203.222	-1.45244	-6.55839	-14.6742	2.14094
--	--	--	--	--	206.681	-0.08593	-0.13811	-0.24751	-0.39142	203.322	-1.45018	-6.55834	-14.6749	2.14507
--	--	--	--	--	206.781	-0.08637	-0.13757	-0.24732	-0.39149	203.422	-1.44797	-6.5583	-14.6757	2.14906
--	--	--	--	--	206.881	-0.08682	-0.13703	-0.24714	-0.39155	203.522	-1.4457	-6.55826	-14.6765	2.15301
--	--	--	--	--	206.981	-0.08714	-0.1365	-0.24695	-0.39163	203.622	-1.44404	-6.55822	-14.6774	2.15714
--	--	--	--	--	207.081	-0.08753	-0.13597	-0.24676	-0.39171	203.722	-1.4423	-6.55818	-14.6783	2.16159
--	--	--	--	--	207.181	-0.08798	-0.13541	-0.24655	-0.3918	203.822	-1.44046	-6.55815	-14.6792	2.16611
--	--	--	--	--	207.281	-0.0882	-0.13483	-0.24635	-0.39189	203.922	-1.43896	-6.55812	-14.6801	2.17044
--	--	--	--	--	207.381	-0.08843	-0.13428	-0.24617	-0.39197	204.022	-1.43633	-6.55809	-14.681	2.1745
--	--	--	--	--	207.481	-0.0888	-0.13378	-0.24602	-0.39205	204.122	-1.43397	-6.55806	-14.6818	2.17829
--	--	--	--	--	207.581	-0.08905	-0.13329	-0.24586	-0.39213	204.222	-1.43231	-6.55804	-14.6827	2.18196
--	--	--	--	--	207.681	-0.08923	-0.13275	-0.2457	-0.39223	204.322	-1.43073	-6.55802	-14.6836	2.18567
--	--	--	--	--	207.781	-0.08944	-0.13213	-0.24552	-0.39235	204.422	-1.42892	-6.558	-14.6845	2.1896
--	--	--	--	--	207.881	-0.08959	-0.13151	-0.24536	-0.39247	204.522	-1.42707	-6.55799	-14.6853	2.19392
--	--	--	--	--	207.981	-0.08972	-0.13095	-0.2452	-0.39259	204.622	-1.42528	-6.55797	-14.6861	2.19839
--	--	--	--	--	208.081	-0.08984	-0.13042	-0.24507	-0.3927	204.722	-1.42348	-6.55796	-14.6869	2.20224
--	--	--	--	--	208.181	-0.08993	-0.12985	-0.24495	-0.39281	204.822	-1.42124	-6.55795	-14.6879	2.20543
--	--	--	--	--	208.281	-0.09001	-0.12925	-0.24483	-0.39292	204.922	-1.41851	-6.55795	-14.6889	2.20905
--	--	--	--	--	208.381	-0.09008	-0.12868	-0.24472	-0.39304	205.022	-1.41702	-6.55795	-14.6898	2.21405
--	--	--	--	--	208.481	-0.09013	-0.12818	-0.24461	-0.39317	205.122	-1.4159	-6.55795	-14.6907	2.21923
--	--	--	--	--	208.581	-0.09016	-0.12772	-0.24448	-0.39333	205.222	-1.41397	-6.55795	-14.6915	2.22301
--	--	--	--	--	208.681	-0.09017	-0.12725	-0.24436	-0.39347	205.322	-1.41134	-6.55795	-14.6923	2.22604
--	--	--	--	--	208.781	-0.09016	-0.12676	-0.24423	-0.3936	205.422	-1.40992	-6.55796	-14.6931	2.22936
--	--	--	--	--	208.881	-0.09014	-0.12625	-0.24412	-0.39373	205.522	-1.40779	-6.55797	-14.6939	2.23341
--	--	--	--	--	208.981	-0.09009	-0.12573	-0.24402	-0.39386	205.622	-1.40577	-6.55798	-14.6948	2.23779
--	--	--	--	--	209.081	-0.09005	-0.1252	-0.24394	-0.39401	205.722	-1.4037	-6.558	-14.6958	2.2421
--	--	--	--	--	209.181	-0.08999	-0.12467	-0.24386	-0.39418	205.822	-1.40131	-6.55802	-14.6968	2.24603
--	--	--	--	--	209.281	-0.08992	-0.12415	-0.24378	-0.39437	205.922	-1.39964	-6.55804	-14.6979	2.24951
--	--	--	--	--	209.381	-0.08984	-0.12363	-0.2437	-0.39454	206.022	-1.39735	-6.55806	-14.6989	2.25326
--	--	--	--	--	209.481	-0.08969	-0.12312	-0.24362	-0.39469	206.122	-1.39528	-6.55809	-14.6997	2.25806
--	--	--	--	--	209.581	-0.08958	-0.12261	-0.24354	-0.39484	206.222	-1.39331	-6.55812	-14.7005	2.26318
--	--	--	--	--	209.681	-0.08948	-0.12212	-0.24346	-0.39499	206.322	-1.3916	-6.55815	-14.7013	2.26717
--	--	--	--	--	209.781	-0.08933	-0.12164	-0.24339	-0.39514	206.422	-1.39014	-6.55818	-14.7022	2.27046
--	--	--	--	--	209.881	-0.08919	-0.12116	-0.24333	-0.39531	206.522	-1.38825	-6.55821	-14.7032	2.27425
--	--	--	--	--	209.981	-0.0891	-0.12063	-0.24327	-0.39549	206.622	-1.38611	-6.55825	-14.7041	2.27889
--	--	--	--	--	210.081	-0.08897	-0.12008	-0.24321	-0.39569	206.722	-1.38406	-6.55829	-14.7049	2.28338
--	--	--	--	--	210.181	-0.08885	-0.11956	-0.24316	-0.39589	206.822	-1.38193	-6.55833	-14.7057	2.28724
--	--	--	--	--	210.281	-0.08871	-0.11909	-0.24311	-0.39607	206.922	-1.37989	-6.55838	-14.7065	2.29106
--	--	--	--	--	210.381	-0.0885	-0.11862	-0.24307	-0.39623	207.022	-1.37834	-6.55843	-14.7074	2.29532
--	--	--	--	--	210.481	-0.08838	-0.11809	-0.24303	-0.39639	207.122	-1.37555	-6.55848	-14.7083	2.29988
--	--	--	--	--	210.581	-0.08823	-0.11751	-0.24299	-0.39656	207.222	-1.37344	-6.55854	-14.7094	2.30443
--	--	--	--	--	210.681	-0.08805	-0.11699	-0.24296	-0.39678	207.322	-1.37213	-6.5586	-14.7103	2.30865
--	--	--	--	--	210.781	-0.08792	-0.11657	-0.24293	-0.397	207.422	-1.37006	-6.55865	-14.7111	2.31235
--	--	--	--	--	210.881	-0.08782	-0.11616	-0.2429	-0.3972	207.522	-1.36717	-6.55871	-14.7119	2.3159
--	--	--	--	--	210.981	-0.08766	-0.11566	-0.24288	-0.39738	207.622	-1.36544	-6.55877	-14.7128	2.31991
--	--	--	--	--	211.081	-0.08755	-0.11507	-0.24286	-0.39757	207.722	-1.36335	-6.55884	-14.7138	2.32455
--	--	--	--	--	211.181	-0.08741	-0.11452	-0.24284	-0.39778	207.822	-1.3613	-6.55892	-14.7148	2.32934
--	--	--	--	--	211.281	-0.08727	-0.11409	-0.24283	-0.39799	207.922	-1.35949	-6.559	-14.7157	2.33396
--	--	--	--	--	211.381	-0.08718	-0.1137	-0.24281	-0.39821	208.022	-1.35767	-6.55908	-14.7166	2.33836
--	--	--	--	--	211.481	-0.08708	-0.11324	-0.24281	-0.39842	208.122	-1.35577	-6.55915	-14.7174	2.34251
--	--	--	--	--	211.581	-0.08701	-0.11272	-0.2428	-0.39863	208.222	-1.35399	-6.55924	-14.7182	2.34646
--	--	--	--	--	211.681	-0.08691	-0.11222	-0.2428	-0.39884	208.322	-1.35215	-6.55933	-14.7189	2.35033
--	--	--	--	--	211.781	-0.08681	-0.11179	-0.2428	-0.39905	208.422	-1.35009	-6.55942	-14.7197	2.3545
--	--	--	--	--	211.881	-0.08676	-0.11139	-0.2428	-0.39926	208.522	-1.34794	-6.55949	-14.7205	2.35927
--	--	--	--	--	211.981	-0.08671	-0.11097	-0.2428	-0.39946	208.622	-1.34594	-6.55957	-14.7214	2.36414
--	--	--	--	--	212.081	-0.08666	-0.11051	-0.24281	-0.39966	208.722	-1.34423	-6.55965	-14.7224	2.36845
--	--	--	--	--	212.181	-0.08662	-0.11004	-0.24282	-0.39986	208.822	-1.34212	-6.55974	-14.7233	2.37232
--	--	--	--	--	212.281	-0.0866	-0.10959	-0.24284	-0.40007	208.922	-1.33969	-6.55983	-14.7242	2.3761
--	--	--	--	--	212.381	-0.08659	-0.10914	-0.24285	-0.40028	209.022	-1.33771	-6.55993	-14.725	2.38014
--	--	--	--	--	212.481	-0.0866	-0.10871	-0.24287	-0.40049	209.122	-1.33596	-6.56003	-14.7257	2.38481
--	--	--	--	--	212.581	-0.08662	-0.10829	-0.24289	-0.4007	209.222	-1.33416	-6.56013	-14.7264	2.38996
--	--	--	--	--	212.681	-0.08665	-0.10788	-0.24292	-0.40092	209.322	-1.33249	-6.56023	-14.7272	2.39485
--	--	--	--	--	212.781	-0.08668	-0.10749	-0.24295	-0.40113	209.422	-1.33011	-6.56034	-14.728	2.39921
--	--	--	--	--	212.881	-0.08674	-0.1071	-0.24298	-0.40135	209.522	-1.32727	-6.56044	-14.7288	2.40326
--	--	--	--	--	212.981	-0.0868	-0.10672	-0.24302	-0.40157	209.622	-1.32569	-6.56055	-14.7296	2.40717
--	--	--	--	--	213.081	-0.08687	-0.10633	-0.24305	-0.40178	209.722	-1.3238	-6.56065	-14.7305	2.41103
--	--	--	--	--	213.181	-0.08696	-0.10594	-0.24309	-0.40198	209.822	-1.32128	-6.56076	-14.7313	2.41496
--	--	--	--	--	213.281	-0.08708	-0.10553	-0.24312	-0.40217	209.922	-1.31963	-6.56087	-14.7321	2.41921
--	--	--	--	--	213.381	-0.08719	-0.10513	-0.24316	-0.40237	210.022	-1.31824	-6.561	-14.7329	2.42398
--	--	--	--	--	213.481	-0.08735	-0.10474	-0.2432	-0.4026	210.122	-1.31634	-6.56112	-14.7337	2.42891
--	--	--	--	--	213.581	-0.08749	-0.10439	-0.24325	-0.40284	210.222	-1.31481	-6.56124	-14.7344	2.43345
--	--	--	--	--	213.681	-0.08763	-0.10404	-0.2433	-0.40303	210.322	-1.31246	-6.56135	-14.7351	2.43752
--	--	--	--	--	213.781	-0.08779	-0.10368	-0.24336	-0.4032	210.422	-1.31014	-6.56147	-14.7358	2.4412
--	--	--	--	--	213.881	-0.08796	-0.1033	-0.24341	-0.40338	210.522	-1.30856	-6.56162	-14.7365	2.44491
--	--	--	--	--	213.981	-0.08813	-0.10295	-0.24346	-0.40359	210.622	-1.30641	-6.56176	-14.7373	2.44924
--	--	--	--	--	214.081	-0.08834	-0.10262	-0.24351	-0.40379	210.722	-1.30412	-6.56189	-14.738	2.45432
--	--	--	--	--	214.181	-0.08849	-0.1023	-0.24356	-0.40398	210.822	-1.30272	-6.56199	-14.7387	2.45917
--	--	--	--	--	214.281	-0.08867	-0.10196	-0.24362	-0.40417	210.922	-1.30095	-6.56211	-14.7394	2.4633
--	--	--	--	--	214.381	-0.08891	-0.10158	-0.24369	-0.40437	211.022	-1.29886	-6.56226	-14.7401	2.4673
--	--	--	--	--	214.481	-0.08913	-0.1012	-0.24375	-0.40458	211.122	-1.29733	-6.56243	-14.7407	2.47168
--	--	--	--	--	214.581	-0.08932	-0.10084	-0.24382	-0.40475	211.222	-1.29491	-6.56257	-14.7413	2.47629
--	--	--	--	--	214.681	-0.08949	-0.10051	-0.24388	-0.40492	211.322	-1.29311	-6.56269	-14.7419	2.48089
--	--	--	--	--	214.781	-0.08968	-0.10019	-0.24395	-0.40511	211.422	-1.29154	-6.56281	-14.7426	2.4854
--	--	--	--	--	214.881	-0.0899	-0.09989	-0.24402	-0.40531	211.522	-1.28988	-6.56296	-14.7432	2.48983
--	--	--	--	--	214.981	-0.0901	-0.09959	-0.24409	-0.40549	211.622	-1.28837	-6.56312	-14.7439	2.49425
--	--	--	--	--	215.081	-0.09037	-0.09928	-0.24416	-0.40565	211.722	-1.2858	-6.56326	-14.7445	2.49871
--	--	--	--	--	215.181	-0.09056	-0.09898	-0.24423	-0.40581	211.822	-1.28399	-6.56339	-14.7451	2.50315
--	--	--	--	--	215.281	-0.09081	-0.09868	-0.24431	-0.40598	211.922	-1.28259	-6.56352	-14.7457	2.50742
--	--	--	--	--	215.381	-0.09104	-0.09839	-0.24438	-0.40614	212.022	-1.28074	-6.56366	-14.7463	2.51154
--	--	--	--	--	215.481	-0.09119	-0.09814	-0.24446	-0.40629	212.122	-1.27901	-6.56381	-14.7469	2.51568
--	--	--	--	--	215.581	-0.09133	-0.09791	-0.24453	-0.40645	212.222	-1.27663	-6.56397	-14.7476	2.51994
--	--	--	--	--	215.681	-0.0915	-0.09769	-0.2446	-0.40662	212.322	-1.27452	-6.56412	-14.7482	2.52428
--	--	--	--	--	215.781	-0.09164	-0.09746	-0.24468	-0.40677	212.422	-1.27305	-6.56427	-14.7488	2.52866
--	--	--	--	--	215.881	-0.09176	-0.0972	-0.24477	-0.4069	212.522	-1.27121	-6.56442	-14.7494	2.53305
--	--	--	--	--	215.981	-0.0919	-0.09696	-0.24486	-0.40702	212.622	-1.26902	-6.56457	-14.75	2.53746
--	--	--	--	--	216.081	-0.09203	-0.09673	-0.24495	-0.40716	212.722	-1.26767	-6.56472	-14.7505	2.5419
--	--	--	--	--	216.181	-0.0921	-0.09651	-0.24502	-0.40729	212.822	-1.26606	-6.56486	-14.7511	2.54642
--	--	--	--	--	216.281	-0.09218	-0.09629	-0.24511	-0.40741	212.922	-1.2643	-6.565	-14.7517	2.55095
--	--	--	--	--	216.381	-0.09222	-0.09608	-0.2452	-0.40751	213.022	-1.26276	-6.56514	-14.7522	2.55541
--	--	--	--	--	216.481	-0.09225	-0.09588	-0.24529	-0.40762	213.122	-1.26121	-6.56529	-14.7528	2.55972
--	--	--	--	--	216.581	-0.09227	-0.09571	-0.24537	-0.40773	213.222	-1.25921	-6.56545	-14.7532	2.56383
--	--	--	--	--	216.681	-0.09225	-0.09553	-0.24545	-0.40784	213.322	-1.25735	-6.56561	-14.7536	2.56792
--	--	--	--	--	216.781	-0.09223	-0.09535	-0.24553	-0.40793	213.422	-1.25538	-6.56577	-14.7541	2.57247
--	--	--	--	--	216.881	-0.09219	-0.09516	-0.24561	-0.40801	213.522	-1.25337	-6.56591	-14.7546	2.57757
--	--	--	--	--	216.981	-0.09209	-0.095	-0.24571	-0.4081	213.622	-1.25175	-6.56606	-14.7551	2.58232
--	--	--	--	--	217.081	-0.09196	-0.09485	-0.2458	-0.40818	213.722	-1.25003	-6.5662	-14.7556	2.58622
--	--	--	--	--	217.181	-0.09185	-0.09472	-0.24589	-0.40824	213.822	-1.24827	-6.56636	-14.756	2.58995
--	--	--	--	--	217.281	-0.09168	-0.09459	-0.24597	-0.4083	213.922	-1.24661	-6.56652	-14.7565	2.59421
--	--	--	--	--	217.381	-0.09145	-0.09447	-0.24606	-0.40836	214.022	-1.24474	-6.56667	-14.7569	2.59883
--	--	--	--	--	217.481	-0.09123	-0.09435	-0.24616	-0.4084	214.122	-1.24293	-6.56681	-14.7572	2.60323
--	--	--	--	--	217.581	-0.09098	-0.09424	-0.24626	-0.40845	214.222	-1.24164	-6.56695	-14.7576	2.60745
--	--	--	--	--	217.681	-0.09069	-0.09413	-0.24636	-0.40848	214.322	-1.2398	-6.56712	-14.758	2.61201
--	--	--	--	--	217.781	-0.09041	-0.09404	-0.24647	-0.40852	214.422	-1.23772	-6.5673	-14.7584	2.6169
--	--	--	--	--	217.881	-0.09005	-0.09395	-0.24657	-0.40854	214.522	-1.23596	-6.56747	-14.7588	2.62142
--	--	--	--	--	217.981	-0.08971	-0.09388	-0.24668	-0.40856	214.622	-1.23448	-6.56764	-14.7592	2.62546
--	--	--	--	--	218.081	-0.08941	-0.09381	-0.24678	-0.40857	214.722	-1.23303	-6.5678	-14.7596	2.62974
--	--	--	--	--	218.181	-0.08906	-0.09374	-0.24687	-0.40857	214.822	-1.23133	-6.56796	-14.7599	2.63469
--	--	--	--	--	218.281	-0.08859	-0.09369	-0.24695	-0.40857	214.922	-1.22961	-6.56811	-14.7603	2.63962
--	--	--	--	--	218.381	-0.08816	-0.09363	-0.24703	-0.40856	215.022	-1.22767	-6.56827	-14.7606	2.64399
--	--	--	--	--	218.481	-0.08776	-0.09359	-0.24712	-0.40854	215.122	-1.22554	-6.56843	-14.7609	2.64819
--	--	--	--	--	218.581	-0.08728	-0.09356	-0.24722	-0.40851	215.222	-1.22385	-6.56859	-14.7612	2.6527
--	--	--	--	--	218.681	-0.08658	-0.09354	-0.24732	-0.40848	215.322	-1.22135	-6.56876	-14.7615	2.6573
--	--	--	--	--	218.781	-0.08594	-0.09353	-0.24742	-0.40845	215.422	-1.2195	-6.56891	-14.7618	2.66166
--	--	--	--	--	218.881	-0.08554	-0.09352	-0.24751	-0.40839	215.522	-1.21812	-6.56905	-14.7621	2.66603
--	--	--	--	--	218.981	-0.08497	-0.09352	-0.24762	-0.40833	215.622	-1.21648	-6.56918	-14.7623	2.67093
--	--	--	--	--	219.081	-0.08428	-0.09353	-0.24773	-0.40827	215.722	-1.2146	-6.56932	-14.7626	2.67607
--	--	--	--	--	219.181	-0.08368	-0.09355	-0.24783	-0.4082	215.822	-1.21301	-6.56947	-14.7629	2.68052
--	--	--	--	--	219.281	-0.08297	-0.09357	-0.24792	-0.40813	215.922	-1.21128	-6.56963	-14.7632	2.68449
--	--	--	--	--	219.381	-0.08232	-0.0936	-0.24801	-0.40804	216.022	-1.20892	-6.56978	-14.7635	2.68888
--	--	--	--	--	219.481	-0.08157	-0.09364	-0.24811	-0.40795	216.122	-1.20702	-6.56993	-14.7637	2.69387
--	--	--	--	--	219.581	-0.08096	-0.09368	-0.24822	-0.40785	216.222	-1.20538	-6.57008	-14.7639	2.69852
--	--	--	--	--	219.681	-0.08042	-0.09374	-0.24833	-0.40774	216.322	-1.2033	-6.57023	-14.7641	2.7025
--	--	--	--	--	219.781	-0.07972	-0.0938	-0.24843	-0.40762	216.422	-1.20169	-6.57038	-14.7644	2.70661
--	--	--	--	--	219.881	-0.07907	-0.09387	-0.24852	-0.40749	216.522	-1.20128	-6.57052	-14.7646	2.7115
--	--	--	--	--	219.981	-0.07845	-0.09395	-0.24862	-0.40735	216.622	-1.19958	-6.57065	-14.7648	2.71656
--	--	--	--	--	220.081	-0.07785	-0.09404	-0.24872	-0.40722	216.722	-1.19519	-6.57079	-14.765	2.72113
--	--	--	--	--	220.181	-0.0772	-0.09414	-0.24882	-0.40708	216.822	-1.1946	-6.57095	-14.7652	2.72552
--	--	--	--	--	220.281	-0.07601	-0.09424	-0.24893	-0.40695	216.922	-1.1932	-6.5711	-14.7654	2.7302
--	--	--	--	--	220.381	-0.07542	-0.09434	-0.24903	-0.40681	217.022	-1.19042	-6.57124	-14.7656	2.735
--	--	--	--	--	220.481	-0.07484	-0.09446	-0.24912	-0.40666	217.122	-1.18847	-6.57138	-14.7658	2.73958
--	--	--	--	--	220.581	-0.07402	-0.09459	-0.24921	-0.40647	217.222	-1.18676	-6.5715	-14.7659	2.74394
--	--	--	--	--	220.681	-0.07327	-0.09472	-0.2493	-0.40625	217.322	-1.1844	-6.57163	-14.7661	2.74823
--	--	--	--	--	220.781	-0.07265	-0.09485	-0.2494	-0.40606	217.422	-1.18218	-6.57176	-14.7662	2.75255
--	--	--	--	--	220.881	-0.07198	-0.09499	-0.24951	-0.4059	217.522	-1.18024	-6.57189	-14.7664	2.7569
--	--	--	--	--	220.981	-0.07139	-0.09514	-0.24964	-0.40571	217.622	-1.17805	-6.57203	-14.7666	2.76135
--	--	--	--	--	221.081	-0.07072	-0.09529	-0.24976	-0.40547	217.722	-1.17613	-6.57216	-14.7668	2.76599
--	--	--	--	--	221.181	-0.07004	-0.09544	-0.24987	-0.40522	217.822	-1.17415	-6.57228	-14.7669	2.7708
--	--	--	--	--	221.281	-0.06951	-0.0956	-0.24997	-0.405	217.922	-1.17193	-6.5724	-14.7671	2.77541
--	--	--	--	--	221.381	-0.06901	-0.09577	-0.25007	-0.40477	218.022	-1.17017	-6.57252	-14.7673	2.77956
--	--	--	--	--	221.481	-0.06854	-0.09596	-0.25016	-0.40452	218.122	-1.16857	-6.57265	-14.7674	2.78357
--	--	--	--	--	221.581	-0.068	-0.09618	-0.25027	-0.40426	218.222	-1.1666	-6.57277	-14.7675	2.78782
--	--	--	--	--	221.681	-0.06743	-0.09641	-0.25038	-0.40403	218.322	-1.16435	-6.5729	-14.7677	2.79241
--	--	--	--	--	221.781	-0.06703	-0.09662	-0.2505	-0.40379	218.422	-1.16252	-6.57303	-14.7678	2.79724
--	--	--	--	--	221.881	-0.06659	-0.0968	-0.25061	-0.40352	218.522	-1.16076	-6.57314	-14.7679	2.80207
--	--	--	--	--	221.981	-0.06605	-0.09701	-0.25072	-0.40322	218.622	-1.15838	-6.57325	-14.7681	2.80656
--	--	--	--	--	222.081	-0.06562	-0.09724	-0.25081	-0.4029	218.722	-1.15555	-6.57335	-14.7682	2.81083
--	--	--	--	--	222.181	-0.0653	-0.09749	-0.25091	-0.40258	218.822	-1.15355	-6.57347	-14.7683	2.81547
--	--	--	--	--	222.281	-0.06497	-0.09772	-0.251	-0.40229	218.922	-1.15206	-6.5736	-14.7685	2.82066
--	--	--	--	--	222.381	-0.06465	-0.09793	-0.25112	-0.40203	219.022	-1.14961	-6.57372	-14.7686	2.82565
--	--	--	--	--	222.481	-0.06434	-0.09814	-0.25124	-0.40175	219.122	-1.14744	-6.57383	-14.7688	2.83007
--	--	--	--	--	222.581	-0.06401	-0.09835	-0.25135	-0.40143	219.222	-1.14522	-6.57393	-14.7689	2.83437
--	--	--	--	--	222.681	-0.06377	-0.09858	-0.25145	-0.40108	219.322	-1.14292	-6.57403	-14.769	2.83889
--	--	--	--	--	222.781	-0.0636	-0.09884	-0.25155	-0.40073	219.422	-1.14073	-6.57412	-14.7691	2.84351
--	--	--	--	--	222.881	-0.06341	-0.09912	-0.25165	-0.40039	219.522	-1.13836	-6.57421	-14.7693	2.84805
--	--	--	--	--	222.981	-0.06328	-0.09941	-0.25175	-0.40006	219.622	-1.13666	-6.57431	-14.7694	2.85262
--	--	--	--	--	223.081	-0.0632	-0.09968	-0.25186	-0.39974	219.722	-1.13474	-6.57442	-14.7695	2.85736
--	--	--	--	--	223.181	-0.06312	-0.09995	-0.25197	-0.39941	219.822	-1.13254	-6.57451	-14.7697	2.86222
--	--	--	--	--	223.281	-0.06306	-0.10022	-0.25208	-0.39906	219.922	-1.13063	-6.57461	-14.7698	2.86703
--	--	--	--	--	223.381	-0.06302	-0.10049	-0.25219	-0.39868	220.022	-1.12868	-6.5747	-14.7699	2.87168
--	--	--	--	--	223.481	-0.06302	-0.10077	-0.2523	-0.39826	220.122	-1.12695	-6.5748	-14.7701	2.87605
--	--	--	--	--	223.581	-0.06306	-0.10103	-0.25241	-0.39782	220.222	-1.12415	-6.57489	-14.7702	2.88017
--	--	--	--	--	223.681	-0.0631	-0.1013	-0.25253	-0.39738	220.322	-1.12093	-6.57497	-14.7704	2.88411
--	--	--	--	--	223.781	-0.06316	-0.10158	-0.25265	-0.39697	220.422	-1.11947	-6.57506	-14.7705	2.88809
--	--	--	--	--	223.881	-0.06326	-0.10188	-0.25278	-0.3966	220.522	-1.11722	-6.57514	-14.7706	2.89258
--	--	--	--	--	223.981	-0.06336	-0.10219	-0.2529	-0.39626	220.622	-1.11456	-6.57522	-14.7707	2.89789
--	--	--	--	--	224.081	-0.06352	-0.10249	-0.25301	-0.39592	220.722	-1.11241	-6.5753	-14.7709	2.90311
--	--	--	--	--	224.181	-0.0637	-0.1028	-0.25311	-0.39553	220.822	-1.11029	-6.57538	-14.771	2.90727
--	--	--	--	--	224.281	-0.06387	-0.1031	-0.2532	-0.39506	220.922	-1.10811	-6.57545	-14.7712	2.91108
--	--	--	--	--	224.381	-0.06405	-0.10342	-0.25331	-0.39459	221.022	-1.10608	-6.57553	-14.7714	2.91568
--	--	--	--	--	224.481	-0.06422	-0.10374	-0.25342	-0.3942	221.122	-1.10357	-6.5756	-14.7716	2.92101
--	--	--	--	--	224.581	-0.06442	-0.10405	-0.25355	-0.39382	221.222	-1.1014	-6.57566	-14.7718	2.92597
--	--	--	--	--	224.681	-0.06466	-0.10435	-0.25368	-0.39337	221.322	-1.09947	-6.57573	-14.7719	2.93041
--	--	--	--	--	224.781	-0.06489	-0.10466	-0.25381	-0.3929	221.422	-1.0976	-6.57579	-14.7721	2.93496
--	--	--	--	--	224.881	-0.06513	-0.10497	-0.25394	-0.39248	221.522	-1.09572	-6.57587	-14.7722	2.93977
--	--	--	--	--	224.981	-0.06546	-0.10527	-0.25405	-0.39211	221.622	-1.09327	-6.57594	-14.7724	2.94434
--	--	--	--	--	225.081	-0.06573	-0.10557	-0.25417	-0.39165	221.722	-1.09115	-6.57601	-14.7726	2.94852
--	--	--	--	--	225.181	-0.06606	-0.10586	-0.25429	-0.3911	221.822	-1.08937	-6.57607	-14.7729	2.95278
--	--	--	--	--	225.281	-0.06646	-0.10616	-0.25441	-0.39062	221.922	-1.08703	-6.57612	-14.773	2.95753
--	--	--	--	--	225.381	-0.06669	-0.10646	-0.25454	-0.39023	222.022	-1.08435	-6.57618	-14.7732	2.96268
--	--	--	--	--	225.481	-0.06691	-0.10677	-0.25465	-0.38981	222.122	-1.08235	-6.57624	-14.7734	2.96793
--	--	--	--	--	225.581	-0.06727	-0.10712	-0.25477	-0.38928	222.222	-1.0805	-6.5763	-14.7736	2.97282
--	--	--	--	--	225.681	-0.06757	-0.10749	-0.25489	-0.38875	222.322	-1.07847	-6.57635	-14.7738	2.97701
--	--	--	--	--	225.781	-0.06779	-0.10784	-0.25502	-0.38829	222.422	-1.07631	-6.57639	-14.774	2.98094
--	--	--	--	--	225.881	-0.06805	-0.10815	-0.25516	-0.38784	222.522	-1.07392	-6.57644	-14.7743	2.98527
--	--	--	--	--	225.981	-0.06832	-0.10846	-0.2553	-0.38737	222.622	-1.07125	-6.57648	-14.7745	2.99014
--	--	--	--	--	226.081	-0.06853	-0.10878	-0.25544	-0.38688	222.722	-1.06938	-6.57652	-14.7747	2.99516
--	--	--	--	--	226.181	-0.06881	-0.10911	-0.25558	-0.38637	222.822	-1.06729	-6.57657	-14.7749	3.00006
--	--	--	--	--	226.281	-0.06908	-0.10945	-0.25571	-0.38586	222.922	-1.06502	-6.57662	-14.7751	3.00468
--	--	--	--	--	226.381	-0.06927	-0.10975	-0.25585	-0.38534	223.022	-1.06327	-6.57666	-14.7754	3.00902
--	--	--	--	--	226.481	-0.06945	-0.11005	-0.25601	-0.38486	223.122	-1.06161	-6.5767	-14.7756	3.01328
--	--	--	--	--	226.581	-0.06966	-0.11037	-0.25618	-0.38445	223.222	-1.05984	-6.57674	-14.7759	3.01767
--	--	--	--	--	226.681	-0.06985	-0.11072	-0.25633	-0.38405	223.322	-1.05744	-6.57678	-14.7761	3.02234
--	--	--	--	--	226.781	-0.07003	-0.11106	-0.25648	-0.38359	223.422	-1.05469	-6.57681	-14.7764	3.0274
--	--	--	--	--	226.881	-0.07023	-0.1114	-0.25661	-0.38308	223.522	-1.05243	-6.57685	-14.7766	3.03276
--	--	--	--	--	226.981	-0.0704	-0.11175	-0.25674	-0.38262	223.622	-1.05015	-6.57688	-14.7769	3.03821
--	--	--	--	--	227.081	-0.07056	-0.1121	-0.25689	-0.38221	223.722	-1.04861	-6.57691	-14.7772	3.04344
--	--	--	--	--	227.181	-0.07065	-0.11245	-0.25706	-0.38177	223.822	-1.04691	-6.57694	-14.7775	3.04815
--	--	--	--	--	227.281	-0.07074	-0.11274	-0.25725	-0.38125	223.922	-1.04496	-6.57697	-14.7778	3.05238
--	--	--	--	--	227.381	-0.07081	-0.11299	-0.25744	-0.38073	224.022	-1.04303	-6.577	-14.7781	3.0563
--	--	--	--	--	227.481	-0.07086	-0.11324	-0.25761	-0.38026	224.122	-1.04068	-6.57703	-14.7783	3.06038
--	--	--	--	--	227.581	-0.0709	-0.11355	-0.25776	-0.37981	224.222	-1.03859	-6.57706	-14.7785	3.06523
--	--	--	--	--	227.681	-0.07092	-0.11391	-0.2579	-0.37933	224.322	-1.03669	-6.57709	-14.7788	3.07076
--	--	--	--	--	227.781	-0.07093	-0.11426	-0.25806	-0.37884	224.422	-1.03493	-6.57711	-14.7791	3.07574
--	--	--	--	--	227.881	-0.07092	-0.11456	-0.25823	-0.37836	224.522	-1.03329	-6.57714	-14.7794	3.07992
--	--	--	--	--	227.981	-0.07089	-0.11483	-0.25841	-0.37788	224.622	-1.03142	-6.57716	-14.7797	3.08431
--	--	--	--	--	228.081	-0.07085	-0.1151	-0.25858	-0.37742	224.722	-1.02942	-6.57719	-14.78	3.08948
--	--	--	--	--	228.181	-0.07079	-0.11536	-0.25875	-0.37698	224.822	-1.02757	-6.57721	-14.7803	3.09449
--	--	--	--	--	228.281	-0.07072	-0.11564	-0.25893	-0.37657	224.922	-1.02559	-6.57723	-14.7806	3.09864
--	--	--	--	--	228.381	-0.07063	-0.11592	-0.25913	-0.37616	225.022	-1.02308	-6.57725	-14.7809	3.1029
--	--	--	--	--	228.481	-0.07054	-0.11621	-0.25933	-0.37569	225.122	-1.02133	-6.57727	-14.7812	3.10834
--	--	--	--	--	228.581	-0.07044	-0.11652	-0.25953	-0.37516	225.222	-1.01844	-6.57729	-14.7815	3.11406
--	--	--	--	--	228.681	-0.07023	-0.11682	-0.25972	-0.37465	225.322	-1.01621	-6.57731	-14.7819	3.11856
--	--	--	--	--	228.781	-0.07014	-0.11711	-0.25991	-0.37419	225.422	-1.01486	-6.57733	-14.7822	3.12261
--	--	--	--	--	228.881	-0.06999	-0.11738	-0.26011	-0.37373	225.522	-1.013	-6.57735	-14.7824	3.1275
--	--	--	--	--	228.981	-0.06979	-0.11763	-0.26032	-0.37324	225.622	-1.01046	-6.57737	-14.7827	3.13312
--	--	--	--	--	229.081	-0.06966	-0.11788	-0.26053	-0.37278	225.722	-1.0087	-6.57739	-14.783	3.13826
--	--	--	--	--	229.181	-0.0695	-0.11813	-0.26073	-0.37237	225.822	-1.00708	-6.57741	-14.7834	3.14285
--	--	--	--	--	229.281	-0.06928	-0.11838	-0.26096	-0.37199	225.922	-1.0051	-6.57743	-14.7837	3.14751
--	--	--	--	--	229.381	-0.06906	-0.11862	-0.26121	-0.37162	226.022	-1.00327	-6.57745	-14.7841	3.15245
--	--	--	--	--	229.481	-0.06882	-0.11886	-0.26146	-0.37121	226.122	-1.00163	-6.57747	-14.7844	3.15752
--	--	--	--	--	229.581	-0.06857	-0.11909	-0.26172	-0.37075	226.222	-0.99924	-6.57749	-14.7847	3.16268
--	--	--	--	--	229.681	-0.06839	-0.11932	-0.26197	-0.37027	226.322	-0.99734	-6.57751	-14.7851	3.16796
--	--	--	--	--	229.781	-0.06821	-0.11956	-0.26224	-0.36986	226.422	-0.99578	-6.57752	-14.7854	3.17311
--	--	--	--	--	229.881	-0.06793	-0.11982	-0.26251	-0.36952	226.522	-0.994	-6.57754	-14.7858	3.17763
--	--	--	--	--	229.981	-0.06773	-0.12006	-0.26276	-0.36914	226.622	-0.99197	-6.57757	-14.7862	3.1816
--	--	--	--	--	230.081	-0.06756	-0.12028	-0.26297	-0.36871	226.722	-0.99017	-6.57759	-14.7865	3.18582
--	--	--	--	--	230.181	-0.06732	-0.12048	-0.26318	-0.36828	226.822	-0.98789	-6.57761	-14.7868	3.1908
--	--	--	--	--	230.281	-0.06707	-0.12068	-0.26343	-0.36789	226.922	-0.98569	-6.57764	-14.7871	3.19585
--	--	--	--	--	230.381	-0.06688	-0.12089	-0.26372	-0.36747	227.022	-0.98315	-6.57766	-14.7874	3.20019
--	--	--	--	--	230.481	-0.06666	-0.12111	-0.26403	-0.367	227.122	-0.98097	-6.57769	-14.7878	3.20432
--	--	--	--	--	230.581	-0.06647	-0.12133	-0.26428	-0.36657	227.222	-0.9793	-6.57772	-14.7882	3.20911
--	--	--	--	--	230.681	-0.06631	-0.12154	-0.26451	-0.36623	227.322	-0.97731	-6.57774	-14.7886	3.21448
--	--	--	--	--	230.781	-0.06608	-0.12173	-0.26474	-0.36591	227.422	-0.9753	-6.57776	-14.789	3.21956
--	--	--	--	--	230.881	-0.0659	-0.12188	-0.26501	-0.36556	227.522	-0.97349	-6.57779	-14.7893	3.22418
--	--	--	--	--	230.981	-0.06573	-0.12203	-0.26531	-0.3652	227.622	-0.97171	-6.57782	-14.7896	3.22886
--	--	--	--	--	231.081	-0.06557	-0.12219	-0.26562	-0.36485	227.722	-0.96974	-6.57786	-14.7899	3.23379
--	--	--	--	--	231.181	-0.06543	-0.12237	-0.26592	-0.36451	227.822	-0.96765	-6.5779	-14.7903	3.23881
--	--	--	--	--	231.281	-0.06529	-0.12256	-0.26621	-0.36417	227.922	-0.96577	-6.57793	-14.7906	3.24375
--	--	--	--	--	231.381	-0.06517	-0.12274	-0.26648	-0.36381	228.022	-0.964	-6.57796	-14.7909	3.24859
--	--	--	--	--	231.481	-0.06504	-0.1229	-0.26676	-0.36346	228.122	-0.96194	-6.578	-14.7913	3.25329
--	--	--	--	--	231.581	-0.06491	-0.12305	-0.26708	-0.36311	228.222	-0.95979	-6.57803	-14.7916	3.25775
--	--	--	--	--	231.681	-0.06483	-0.1232	-0.26744	-0.3628	228.322	-0.95797	-6.57807	-14.7919	3.26199
--	--	--	--	--	231.781	-0.06475	-0.12334	-0.2678	-0.3625	228.422	-0.95589	-6.57811	-14.7923	3.26647
--	--	--	--	--	231.881	-0.06468	-0.12347	-0.26811	-0.36221	228.522	-0.95435	-6.57816	-14.7927	3.27172
--	--	--	--	--	231.981	-0.06464	-0.12361	-0.2684	-0.3619	228.622	-0.95171	-6.57821	-14.793	3.2774
--	--	--	--	--	232.081	-0.06461	-0.12375	-0.26871	-0.36157	228.722	-0.94919	-6.57826	-14.7934	3.28261
--	--	--	--	--	232.181	-0.06459	-0.1239	-0.26905	-0.36125	228.822	-0.94811	-6.57832	-14.7937	3.28748
--	--	--	--	--	232.281	-0.06458	-0.12405	-0.26942	-0.36094	228.922	-0.94548	-6.57837	-14.794	3.29261
--	--	--	--	--	232.381	-0.0646	-0.12418	-0.26977	-0.36062	229.022	-0.94351	-6.57842	-14.7944	3.29785
--	--	--	--	--	232.481	-0.06462	-0.12431	-0.2701	-0.36032	229.122	-0.94199	-6.57847	-14.7947	3.30267
--	--	--	--	--	232.581	-0.06468	-0.12442	-0.27042	-0.36004	229.222	-0.93996	-6.57853	-14.7951	3.30704
--	--	--	--	--	232.681	-0.06476	-0.12453	-0.27074	-0.35978	229.322	-0.93748	-6.57859	-14.7954	3.31122
--	--	--	--	--	232.781	-0.06481	-0.12462	-0.27107	-0.35952	229.422	-0.9353	-6.57865	-14.7958	3.31554
--	--	--	--	--	232.881	-0.06496	-0.12472	-0.27143	-0.35925	229.522	-0.93274	-6.57872	-14.7962	3.3204
--	--	--	--	--	232.981	-0.06508	-0.12481	-0.27182	-0.35901	229.622	-0.93058	-6.57878	-14.7966	3.32593
--	--	--	--	--	233.081	-0.06521	-0.1249	-0.27221	-0.35877	229.722	-0.92894	-6.57885	-14.7969	3.33119
--	--	--	--	--	233.181	-0.06538	-0.12499	-0.2726	-0.35853	229.822	-0.92687	-6.57893	-14.7973	3.3355
--	--	--	--	--	233.281	-0.06554	-0.12508	-0.27299	-0.35829	229.922	-0.92432	-6.57902	-14.7977	3.33961
--	--	--	--	--	233.381	-0.0657	-0.12516	-0.27335	-0.35806	230.022	-0.9227	-6.5791	-14.798	3.34438
--	--	--	--	--	233.481	-0.06592	-0.12524	-0.27371	-0.35785	230.122	-0.92079	-6.57918	-14.7983	3.34965
--	--	--	--	--	233.581	-0.06615	-0.12531	-0.27407	-0.35764	230.222	-0.91833	-6.57925	-14.7985	3.35465
--	--	--	--	--	233.681	-0.06635	-0.12537	-0.27443	-0.35743	230.322	-0.91616	-6.57934	-14.7989	3.35955
--	--	--	--	--	233.781	-0.06657	-0.12543	-0.27482	-0.35723	230.422	-0.91428	-6.57943	-14.7993	3.36515
--	--	--	--	--	233.881	-0.06682	-0.12548	-0.27524	-0.35703	230.522	-0.91197	-6.57953	-14.7996	3.37105
--	--	--	--	--	233.981	-0.06715	-0.12554	-0.27569	-0.35685	230.622	-0.91027	-6.57964	-14.7999	3.37601
--	--	--	--	--	234.081	-0.06741	-0.12558	-0.27615	-0.35669	230.722	-0.90823	-6.57974	-14.8001	3.38019
[truncated: 6,692 more rows]

## Sheet: HCG
HCG
Temperature	TG	TG	TG	TG	Temperature	DTG	DTG	DTG	DTG	Temperature	DSC	DSC	DSC	DSC
°C	%	%	%	%	°C	%/min	%/min	%/min	%/min	°C	mW	mW	mW	mW
	5°C/min	10°C/min	15°C/min	20°C/min		5°C/min	10°C/min	15°C/min	20°C/min		5°C/min	10°C/min	15°C/min	20°C/min
28	99.793	99.9658	99.9605	99.9786	21.513	-0.0362	-0.32141	0.07	0.01645	21.513	-1.08569	0.03404	0.04234	-0.19769
30.9033	99.6526	99.9856	99.8948	99.8204	22.013	-0.0362	-0.09998	-0.2241	0.01645	22.013	-1.08569	-0.09104	-0.35081	-0.19769
33.8067	99.6032	99.9893	99.8332	99.7206	22.513	-0.0362	0.01675	-0.25043	0.01645	22.513	-1.08569	-0.43948	-0.64716	-0.19769
36.71	99.5685	99.9796	99.7738	99.6266	23.013	-0.0362	0.06044	-0.25238	0.01645	23.013	-1.08569	-0.65806	-0.72547	-0.19769
39.6133	99.5359	99.9585	99.7155	99.5372	23.513	-0.0362	0.08236	-0.25495	0.01645	23.513	-1.08569	-0.82672	-0.85201	-0.19769
42.5167	99.501	99.9279	99.6583	99.4511	24.013	-0.0362	0.09491	-0.25583	0.01645	24.013	-1.08569	-0.97901	-0.96412	-0.19769
45.42	99.4616	99.889	99.6025	99.3667	24.513	-0.0362	0.10132	-0.25603	0.01645	24.513	-1.08569	-1.11045	-1.05103	-0.19769
48.3233	99.4151	99.8433	99.5448	99.2812	25.013	-0.0362	0.10408	-0.25614	0.01645	25.013	-1.08569	-1.22583	-1.13183	-0.19769
51.2267	99.3605	99.7912	99.4873	99.1923	25.513	-0.0362	0.10451	-0.25641	0.01645	25.513	-1.08569	-1.34451	-1.20275	-0.19769
54.13	99.2956	99.7338	99.4285	99.1004	26.013	-0.0362	0.10288	-0.25695	0.01645	26.013	-1.08569	-1.45932	-1.26679	-0.19769
57.0333	99.2217	99.6707	99.3685	99.0042	26.513	-0.0362	0.09991	-0.25781	0.01645	26.513	-1.08569	-1.56378	-1.32444	-0.19769
59.9367	99.1438	99.603	99.3068	98.9037	27.013	-0.0362	0.09506	-0.25892	-0.31696	27.013	-1.08569	-1.6817	-1.37561	-0.46647
62.84	99.0649	99.5301	99.2434	98.7991	27.513	-0.11153	0.09	-0.26068	-0.31327	27.513	-1.25554	-1.77881	-1.43344	-1.09734
65.7433	98.9854	99.4533	99.1791	98.6909	28.013	-0.14538	0.08319	-0.26251	-0.2931	28.013	-1.6005	-1.89057	-1.48155	-1.51538
68.6467	98.9078	99.3709	99.1127	98.5787	28.513	-0.12953	0.07667	-0.26473	-0.28143	28.513	-1.89012	-1.98511	-1.5302	-1.72996
71.55	98.8326	99.2824	99.0446	98.4655	29.013	-0.11786	0.06903	-0.26712	-0.25727	29.013	-2.04972	-2.08647	-1.57585	-2.17502
74.4533	98.7596	99.1908	98.9728	98.3509	29.513	-0.10821	0.06094	-0.2697	-0.24445	29.513	-2.19042	-2.18602	-1.62039	-2.42861
77.3567	98.6862	99.0966	98.8993	98.2378	30.013	-0.0999	0.05308	-0.2726	-0.23248	30.013	-2.32703	-2.2776	-1.66645	-2.68889
80.26	98.6085	98.9999	98.8236	98.1262	30.513	-0.0931	0.04531	-0.27559	-0.22279	30.513	-2.4556	-2.36409	-1.71148	-2.92707
83.1633	98.5227	98.903	98.7452	98.0171	31.013	-0.0875	0.03637	-0.27862	-0.21527	31.013	-2.57822	-2.46	-1.75528	-3.13923
86.0667	98.4404	98.808	98.6664	97.9112	31.513	-0.08325	0.02782	-0.28168	-0.20874	31.513	-2.68537	-2.54897	-1.79856	-3.35408
88.97	98.3754	98.7151	98.5863	97.8077	32.013	-0.0792	0.01866	-0.28456	-0.2036	32.013	-2.80476	-2.64177	-1.83879	-3.55565
91.8733	98.3299	98.6232	98.5058	97.7049	32.513	-0.07627	0.01017	-0.28778	-0.19993	32.513	-2.90653	-2.72609	-1.88397	-3.72901
94.7767	98.2969	98.534	98.4253	97.6012	33.013	-0.07378	0.00067867	-0.29069	-0.19661	33.013	-3.00937	-2.81884	-1.92499	-3.91994
97.68	98.2676	98.4473	98.3445	97.4956	33.513	-0.07186	-0.00825	-0.29336	-0.19424	33.513	-3.10696	-2.90482	-1.96342	-4.0905
100.583	98.2388	98.3622	98.2661	97.3866	34.013	-0.07051	-0.01666	-0.29617	-0.19218	34.013	-3.19297	-2.98504	-2.00456	-4.28168
103.487	98.2142	98.2788	98.1885	97.2754	34.513	-0.06939	-0.02525	-0.29923	-0.19083	34.513	-3.2884	-3.06626	-2.05075	-4.44974
106.39	98.1974	98.1946	98.113	97.1624	35.013	-0.06873	-0.03442	-0.30177	-0.19001	35.013	-3.37532	-3.15238	-2.0903	-4.58741
109.293	98.1887	98.1118	98.0395	97.0499	35.513	-0.06842	-0.04422	-0.30403	-0.1893	35.513	-3.45271	-3.24401	-2.12668	-4.75834
112.197	98.1804	98.0311	97.9683	96.9385	36.013	-0.06839	-0.05142	-0.30629	-0.18891	36.013	-3.53528	-3.31111	-2.16411	-4.91666
115.1	98.1666	97.9519	97.9002	96.8304	36.513	-0.0687	-0.06145	-0.30878	-0.18875	36.513	-3.62082	-3.4044	-2.2066	-5.0656
118.003	98.1521	97.8761	97.8358	96.7262	37.013	-0.06925	-0.06873	-0.31068	-0.18877	37.013	-3.69522	-3.47197	-2.24011	-5.21075
120.907	98.1444	97.8034	97.7737	96.626	37.513	-0.07	-0.07763	-0.31285	-0.18895	37.513	-3.76518	-3.55455	-2.27921	-5.36254
123.81	98.1428	97.7347	97.7146	96.5288	38.013	-0.07102	-0.08608	-0.31483	-0.1893	38.013	-3.83726	-3.63312	-2.31567	-5.51006
126.713	98.1411	97.669	97.6592	96.4328	38.513	-0.07224	-0.09348	-0.31692	-0.18973	38.513	-3.90619	-3.70191	-2.35501	-5.6376
129.617	98.1373	97.6065	97.6071	96.3361	39.013	-0.07357	-0.10179	-0.31861	-0.19037	39.013	-3.96973	-3.77936	-2.38707	-5.78309
132.52	98.1354	97.5473	97.5575	96.2391	39.513	-0.07516	-0.11104	-0.32061	-0.19103	39.513	-4.03568	-3.86578	-2.42512	-5.9032
135.423	98.1404	97.4918	97.5117	96.1414	40.013	-0.07686	-0.11812	-0.32242	-0.19196	40.013	-4.0981	-3.93221	-2.45961	-6.04231
138.327	98.1494	97.4392	97.4689	96.0449	40.513	-0.07875	-0.12508	-0.3243	-0.19296	40.513	-4.16021	-3.9976	-2.49508	-6.16772
141.23	98.1555	97.3907	97.4274	95.9505	41.013	-0.08045	-0.13361	-0.32608	-0.19417	41.013	-4.21146	-4.07812	-2.52816	-6.29807
144.133	98.1588	97.3458	97.3873	95.8606	41.513	-0.08282	-0.13981	-0.32796	-0.19563	41.513	-4.27694	-4.1369	-2.56246	-6.43167
147.037	98.1647	97.305	97.3491	95.7762	42.013	-0.08486	-0.14802	-0.32992	-0.19723	42.013	-4.32875	-4.21497	-2.59716	-6.55964
149.94	98.1761	97.2684	97.3118	95.697	42.513	-0.08694	-0.15552	-0.33173	-0.199	42.513	-4.37807	-4.28677	-2.62847	-6.68329
152.843	98.1878	97.2351	97.2738	95.6225	43.013	-0.08933	-0.16181	-0.33363	-0.20107	43.013	-4.43084	-4.34722	-2.66037	-6.81102
155.747	98.1952	97.2048	97.2351	95.5512	43.513	-0.09164	-0.16943	-0.33549	-0.20333	43.513	-4.47853	-4.42097	-2.69064	-6.93511
158.65	98.2034	97.1765	97.1964	95.4822	44.013	-0.09424	-0.17598	-0.33743	-0.20572	44.013	-4.52846	-4.48463	-2.72104	-7.05341
161.553	98.2187	97.1491	97.1563	95.4143	44.513	-0.09669	-0.18284	-0.33949	-0.20826	44.513	-4.57199	-4.55179	-2.75221	-7.16716
164.457	98.2346	97.1209	97.1161	95.3465	45.013	-0.09931	-0.18896	-0.34164	-0.21127	45.013	-4.61536	-4.61202	-2.78371	-7.29023
167.36	98.2396	97.0911	97.0773	95.2783	45.513	-0.10189	-0.1953	-0.34375	-0.21417	45.513	-4.65482	-4.67476	-2.81359	-7.39872
170.263	98.2375	97.0587	97.0392	95.2091	46.013	-0.10507	-0.20167	-0.34593	-0.21774	46.013	-4.69966	-4.73827	-2.84334	-7.52195
173.167	98.2388	97.0228	97.0029	95.1383	46.513	-0.10817	-0.20747	-0.3483	-0.22138	46.513	-4.73961	-4.79638	-2.87452	-7.63809
176.07	98.2473	96.9842	96.9675	95.0659	47.013	-0.11138	-0.21364	-0.35056	-0.225	47.013	-4.77758	-4.85863	-2.90342	-7.74554
178.973	98.2593	96.9443	96.9319	94.9925	47.513	-0.11502	-0.21957	-0.35317	-0.22915	47.513	-4.8168	-4.9189	-2.93557	-7.86083
181.877	98.2668	96.9037	96.8952	94.9194	48.013	-0.11867	-0.22505	-0.35548	-0.2334	48.013	-4.85269	-4.9749	-2.96321	-7.97146
184.78	98.2683	96.8635	96.8564	94.8465	48.513	-0.12234	-0.23077	-0.35771	-0.23786	48.513	-4.88601	-5.0336	-2.98923	-8.08104
187.683	98.269	96.8239	96.8155	94.7741	49.013	-0.12587	-0.23635	-0.36027	-0.24264	49.013	-4.91564	-5.0913	-3.0183	-8.19218
190.587	98.2715	96.7853	96.7737	94.7008	49.513	-0.12995	-0.24197	-0.36274	-0.24755	49.513	-4.94744	-5.14968	-3.04559	-8.30055
193.49	98.2755	96.7473	96.7314	94.6257	50.013	-0.13384	-0.24677	-0.36509	-0.25257	50.013	-4.97586	-5.19979	-3.07093	-8.406
196.393	98.282	96.7106	96.6889	94.5489	50.513	-0.13828	-0.25247	-0.36787	-0.2582	50.513	-5.00643	-5.25942	-3.1002	-8.51894
199.297	98.2906	96.6748	96.6463	94.4717	51.013	-0.14186	-0.25764	-0.37019	-0.26394	51.013	-5.02988	-5.31377	-3.12405	-8.62923
202.2	98.2995	96.6405	96.604	94.396	51.513	-0.14617	-0.26228	-0.3726	-0.2692	51.513	-5.05702	-5.36268	-3.14831	-8.72623
205.103	98.305	96.6069	96.5618	94.3226	52.013	-0.15032	-0.26714	-0.37511	-0.27492	52.013	-5.08242	-5.414	-3.17303	-8.8282
208.007	98.3057	96.5732	96.5199	94.251	52.513	-0.15407	-0.27195	-0.37761	-0.28045	52.513	-5.105	-5.46477	-3.19711	-8.92353
210.91	98.3075	96.5393	96.4788	94.1797	53.013	-0.15777	-0.27652	-0.38013	-0.28659	53.013	-5.12726	-5.51299	-3.22094	-9.02602
213.813	98.311	96.5056	96.4377	94.1072	53.513	-0.16121	-0.28152	-0.38262	-0.29266	53.513	-5.14822	-5.56562	-3.2439	-9.12446
216.717	98.3075	96.4716	96.3968	94.033	54.013	-0.16466	-0.28598	-0.38501	-0.2985	54.013	-5.16998	-5.61247	-3.26543	-9.21677
219.62	98.2977	96.4375	96.3555	93.9578	54.513	-0.16759	-0.29037	-0.38758	-0.3051	54.513	-5.18953	-5.65837	-3.28811	-9.31853
222.523	98.2922	96.4035	96.3137	93.8834	55.013	-0.17012	-0.29493	-0.39012	-0.31088	55.013	-5.20784	-5.70567	-3.31001	-9.40579
225.427	98.2914	96.3696	96.2718	93.8112	55.513	-0.17221	-0.29936	-0.39257	-0.31733	55.513	-5.2246	-5.75144	-3.33062	-9.50102
228.33	98.2942	96.3362	96.2298	93.7415	56.013	-0.17389	-0.30358	-0.39493	-0.32407	56.013	-5.24017	-5.79458	-3.35003	-9.59891
231.233	98.3054	96.3034	96.1876	93.6733	56.513	-0.1753	-0.30819	-0.39727	-0.32949	56.513	-5.25578	-5.84117	-3.36877	-9.67623
234.137	98.322	96.2714	96.1452	93.6058	57.013	-0.17635	-0.31241	-0.39987	-0.3362	57.013	-5.27127	-5.88337	-3.38905	-9.77082
237.04	98.3391	96.24	96.1015	93.5381	57.513	-0.17696	-0.31687	-0.40223	-0.34223	57.513	-5.28449	-5.92726	-3.40703	-9.85474
239.943	98.3575	96.21	96.0565	93.4691	58.013	-0.17725	-0.32101	-0.40467	-0.34929	58.013	-5.29671	-5.96756	-3.42507	-9.95209
242.847	98.379	96.1816	96.0091	93.3976	58.513	-0.17728	-0.3255	-0.40715	-0.35493	58.513	-5.30854	-6.01044	-3.44283	-10.0292
245.75	98.3954	96.1548	95.9606	93.3231	59.013	-0.17708	-0.32934	-0.40947	-0.36136	59.013	-5.31902	-6.04651	-3.45904	-10.1166
248.653	98.4018	96.1285	95.9102	93.2457	59.513	-0.17664	-0.33381	-0.41195	-0.36755	59.513	-5.33021	-6.08773	-3.47588	-10.2004
251.557	98.4075	96.1019	95.8595	93.1664	60.013	-0.17608	-0.33785	-0.41424	-0.37328	60.013	-5.33966	-6.12427	-3.49094	-10.2779
254.46	98.4162	96.0738	95.8093	93.0866	60.513	-0.17547	-0.34163	-0.41678	-0.37917	60.513	-5.34751	-6.15785	-3.50712	-10.3576
257.363	98.4172	96.0444	95.76	93.0069	61.013	-0.17474	-0.34608	-0.41927	-0.38477	61.013	-5.35552	-6.1966	-3.52255	-10.4337
260.267	98.4059	96.0135	95.7108	92.9266	61.513	-0.17413	-0.35011	-0.42171	-0.39057	61.513	-5.36114	-6.23087	-3.53716	-10.5129
263.17	98.3961	95.9827	95.6606	92.8445	62.013	-0.17342	-0.35444	-0.42412	-0.39628	62.013	-5.36696	-6.26701	-3.55113	-10.5915
266.073	98.3958	95.9531	95.6077	92.7606	62.513	-0.17273	-0.35861	-0.42656	-0.40191	62.513	-5.37175	-6.301	-3.56485	-10.6697
268.977	98.3943	95.924	95.5505	92.676	63.013	-0.17203	-0.3628	-0.42937	-0.40709	63.013	-5.3758	-6.33436	-3.58008	-10.7428
271.88	98.3931	95.8954	95.4868	92.593	63.513	-0.17134	-0.36666	-0.43186	-0.41219	63.513	-5.37885	-6.36452	-3.59315	-10.8159
274.783	98.3979	95.8671	95.419	92.5126	64.013	-0.17061	-0.37082	-0.43438	-0.4172	64.013	-5.38102	-6.39633	-3.60594	-10.8892
277.687	98.3977	95.8382	95.3462	92.4336	64.513	-0.16982	-0.37451	-0.4369	-0.42171	64.513	-5.38231	-6.42404	-3.61832	-10.9565
280.59	98.3847	95.8098	95.2706	92.354	65.013	-0.16897	-0.37849	-0.43944	-0.42665	65.013	-5.38278	-6.45335	-3.6304	-11.0323
283.493	98.3645	95.7811	95.1939	92.2718	65.513	-0.16802	-0.38236	-0.44193	-0.4309	65.513	-5.38253	-6.48131	-3.64184	-11.0994
286.397	98.3432	95.753	95.117	92.1856	66.013	-0.16688	-0.38662	-0.44459	-0.43502	66.013	-5.38154	-6.51163	-3.65372	-11.1667
289.3	98.3242	95.724	95.0406	92.0944	66.513	-0.16555	-0.39015	-0.44733	-0.43908	66.513	-5.37981	-6.53627	-3.66548	-11.2355
292.203	98.3103	95.6933	94.9654	91.997	67.013	-0.1641	-0.39381	-0.4502	-0.44322	67.013	-5.3775	-6.5615	-3.6774	-11.3088
295.107	98.2965	95.6604	94.8893	91.8946	67.513	-0.16249	-0.39766	-0.45278	-0.44663	67.513	-5.37458	-6.58769	-3.68772	-11.3723
298.01	98.2752	95.6247	94.8114	91.7897	68.013	-0.16074	-0.40123	-0.45563	-0.45002	68.013	-5.37113	-6.61176	-3.69877	-11.4387
300.913	98.2459	95.587	94.7314	91.6842	68.513	-0.15876	-0.40487	-0.45832	-0.45326	68.513	-5.36689	-6.63603	-3.70887	-11.5063
303.817	98.2163	95.5473	94.6475	91.5798	69.013	-0.15658	-0.40811	-0.46103	-0.45611	69.013	-5.36184	-6.65746	-3.71869	-11.57
306.72	98.1927	95.5063	94.5617	91.4774	69.513	-0.15479	-0.41167	-0.46382	-0.45867	69.513	-5.35736	-6.68095	-3.72846	-11.6316
309.623	98.173	95.4652	94.472	91.3752	70.013	-0.15279	-0.41492	-0.46669	-0.46118	70.013	-5.35193	-6.70235	-3.7382	-11.6977
312.527	98.155	95.4227	94.3779	91.2718	70.513	-0.1509	-0.41824	-0.46948	-0.46321	70.513	-5.34628	-6.72427	-3.74733	-11.7562
315.43	98.1394	95.3793	94.2821	91.1656	71.013	-0.14903	-0.42111	-0.47227	-0.46506	71.013	-5.34	-6.74332	-3.75617	-11.8155
318.333	98.1247	95.335	94.1834	91.0558	71.513	-0.14727	-0.42392	-0.47517	-0.4667	71.513	-5.33322	-6.76212	-3.76504	-11.8745
321.237	98.1048	95.29	94.0839	90.9409	72.013	-0.14575	-0.42665	-0.478	-0.46823	72.013	-5.32635	-6.78057	-3.77341	-11.9388
324.14	98.072	95.2448	93.9852	90.8224	72.513	-0.14456	-0.42907	-0.48092	-0.46938	72.513	-5.31994	-6.79732	-3.7817	-11.996
327.043	98.0263	95.2003	93.8876	90.703	73.013	-0.14347	-0.4315	-0.48371	-0.47036	73.013	-5.31263	-6.81446	-3.78934	-12.0568
329.947	97.9822	95.1563	93.7903	90.5839	73.513	-0.14264	-0.43364	-0.48648	-0.47102	73.513	-5.3051	-6.83012	-3.79667	-12.1087
332.85	97.9538	95.1117	93.694	90.4667	74.013	-0.1421	-0.43569	-0.4897	-0.47159	74.013	-5.29782	-6.84561	-3.80481	-12.175
335.753	97.9344	95.0658	93.598	90.3517	74.513	-0.14184	-0.43739	-0.49227	-0.47185	74.513	-5.29049	-6.85908	-3.81103	-12.2296
338.657	97.9119	95.0188	93.5012	90.2348	75.013	-0.14185	-0.43902	-0.49531	-0.47191	75.013	-5.28287	-6.87281	-3.81807	-12.2849
341.56	97.8818	94.971	93.4044	90.1131	75.513	-0.14212	-0.44044	-0.49792	-0.47179	75.513	-5.27632	-6.88567	-3.8238	-12.3385
344.463	97.8466	94.924	93.3033	89.9853	76.013	-0.14274	-0.44155	-0.50054	-0.47146	76.013	-5.26854	-6.8966	-3.82929	-12.3947
347.367	97.812	94.8786	93.1989	89.852	76.513	-0.14356	-0.44263	-0.50337	-0.47095	76.513	-5.26187	-6.90857	-3.83487	-12.4494
350.27	97.7796	94.8344	93.0893	89.7154	77.013	-0.14477	-0.4435	-0.50591	-0.47034	77.013	-5.25455	-6.91998	-3.83959	-12.4984
353.173	97.7449	94.7907	92.9761	89.5772	77.513	-0.14621	-0.4441	-0.50843	-0.46948	77.513	-5.24765	-6.92982	-3.84394	-12.5544
356.077	97.7042	94.7475	92.8583	89.4371	78.013	-0.14785	-0.4445	-0.51081	-0.46855	78.013	-5.24102	-6.93875	-3.84775	-12.6054
358.98	97.6588	94.703	92.7365	89.2967	78.513	-0.1495	-0.44471	-0.51335	-0.46745	78.513	-5.23511	-6.94772	-3.85148	-12.6578
361.883	97.6154	94.6563	92.6114	89.1562	79.013	-0.1519	-0.44471	-0.51562	-0.4663	79.013	-5.22722	-6.95579	-3.85451	-12.7071
364.787	97.5755	94.6064	92.481	89.0166	79.513	-0.15378	-0.44452	-0.5181	-0.465	79.513	-5.22134	-6.96264	-3.85742	-12.7579
367.69	97.5326	94.5546	92.3491	88.879	80.013	-0.15586	-0.44413	-0.52019	-0.46358	80.013	-5.21485	-6.96912	-3.85955	-12.8095
370.593	97.4761	94.5002	92.2186	88.7395	80.513	-0.15792	-0.44357	-0.52247	-0.4621	80.513	-5.20806	-6.97478	-3.86149	-12.8601
373.497	97.41	94.4442	92.0842	88.5972	81.013	-0.15979	-0.4428	-0.52474	-0.46063	81.013	-5.20113	-6.98001	-3.86298	-12.908
376.4	97.3423	94.3854	91.9473	88.4518	81.513	-0.1613	-0.44186	-0.52667	-0.45916	81.513	-5.19417	-6.98455	-3.86387	-12.9547
379.303	97.2691	94.3244	91.8088	88.3023	82.013	-0.16232	-0.44074	-0.52859	-0.45753	82.013	-5.18724	-6.98844	-3.86436	-13.0049
382.207	97.1873	94.2604	91.6666	88.1501	82.513	-0.16274	-0.43939	-0.5305	-0.45592	82.513	-5.1799	-6.99181	-3.8644	-13.0538
385.11	97.1048	94.1925	91.5196	87.9957	83.013	-0.16237	-0.43802	-0.53209	-0.45446	83.013	-5.17232	-6.99428	-3.86405	-13.0981
388.013	97.0275	94.1212	91.3694	87.8368	83.513	-0.16128	-0.43643	-0.53375	-0.45311	83.513	-5.16565	-6.99625	-3.86323	-13.1393
390.917	96.953	94.0462	91.2123	87.6723	84.013	-0.15926	-0.43476	-0.53507	-0.45154	84.013	-5.15853	-6.99756	-3.86218	-13.1882
393.82	96.8709	93.967	91.0493	87.5024	84.513	-0.15621	-0.43286	-0.53654	-0.45021	84.513	-5.15125	-6.99832	-3.86052	-13.2305
396.723	96.7661	93.8833	90.8804	87.3277	85.013	-0.1524	-0.43097	-0.53779	-0.44891	85.013	-5.14443	-6.99845	-3.85858	-13.274
399.627	96.6438	93.7973	90.7047	87.1484	85.513	-0.1479	-0.42895	-0.53891	-0.44767	85.513	-5.13796	-6.99802	-3.8563	-13.3178
402.53	96.5183	93.7094	90.5213	86.964	86.013	-0.14259	-0.42675	-0.53997	-0.44652	86.013	-5.13159	-6.99697	-3.85352	-13.3612
405.433	96.3904	93.6179	90.3296	86.7716	86.513	-0.13658	-0.42449	-0.54088	-0.44557	86.513	-5.12541	-6.99534	-3.85045	-13.4004
408.337	96.2553	93.5241	90.1261	86.5678	87.013	-0.13002	-0.42228	-0.54178	-0.44463	87.013	-5.11948	-6.99326	-3.8465	-13.4439
411.24	96.1108	93.4266	89.9103	86.3551	87.513	-0.12275	-0.41985	-0.54239	-0.44387	87.513	-5.1136	-6.99048	-3.84292	-13.4852
414.143	95.9643	93.3243	89.6746	86.1275	88.013	-0.11572	-0.41756	-0.54295	-0.44329	88.013	-5.10839	-6.98738	-3.83854	-13.522
417.047	95.806	93.2136	89.4201	85.8915	88.513	-0.10878	-0.41506	-0.54335	-0.44282	88.513	-5.10357	-6.98352	-3.83412	-13.5611
419.95	95.6196	93.0967	89.141	85.6413	89.013	-0.1016	-0.41262	-0.54365	-0.44251	89.013	-5.09881	-6.97927	-3.82905	-13.597
422.853	95.3963	92.9705	88.8344	85.376	89.513	-0.09454	-0.40991	-0.54383	-0.44233	89.513	-5.09424	-6.974	-3.82308	-13.6348
425.757	95.1381	92.8356	88.5017	85.091	90.013	-0.08851	-0.40747	-0.54386	-0.4423	90.013	-5.09035	-6.96876	-3.81771	-13.6712
428.66	94.8486	92.6911	88.1412	84.7734	90.513	-0.08171	-0.40506	-0.54378	-0.44243	90.513	-5.08581	-6.96312	-3.81183	-13.7067
431.563	94.5434	92.5312	87.7431	84.4218	91.013	-0.07638	-0.40228	-0.54355	-0.4427	91.013	-5.08203	-6.95602	-3.8046	-13.7418
434.467	94.2208	92.3566	87.3091	84.0253	91.513	-0.07199	-0.39969	-0.5432	-0.44318	91.513	-5.07862	-6.9488	-3.79739	-13.78
437.37	93.8622	92.165	86.8402	83.5927	92.013	-0.06796	-0.39735	-0.54272	-0.44376	92.013	-5.07507	-6.94175	-3.78971	-13.8131
440.273	93.4622	91.949	86.324	83.1276	92.513	-0.0646	-0.39485	-0.54211	-0.44448	92.513	-5.07158	-6.93365	-3.78147	-13.8463
443.177	93.009	91.701	85.7626	82.6269	93.013	-0.06201	-0.39224	-0.54138	-0.44531	93.013	-5.06831	-6.92449	-3.77303	-13.8777
446.08	92.5204	91.4132	85.1553	82.0923	93.513	-0.05966	-0.39	-0.54053	-0.44631	93.513	-5.0645	-6.91603	-3.76397	-13.9099
448.983	91.9976	91.0847	84.5169	81.5281	94.013	-0.0581	-0.3876	-0.53957	-0.44744	94.013	-5.06114	-6.9063	-3.75468	-13.942
451.887	91.4568	90.7014	83.8365	80.9248	94.513	-0.0569	-0.38523	-0.53846	-0.44862	94.513	-5.05765	-6.89598	-3.74455	-13.9716
454.79	90.919	90.268	83.1252	80.2829	95.013	-0.05605	-0.38301	-0.53729	-0.44996	95.013	-5.0543	-6.88561	-3.73443	-14.0022
457.693	90.3815	89.7888	82.3843	79.6037	95.513	-0.05534	-0.38097	-0.53601	-0.45133	95.513	-5.05051	-6.87539	-3.72388	-14.0308
460.597	89.8595	89.2802	81.6179	78.8774	96.013	-0.05481	-0.37875	-0.53451	-0.45287	96.013	-5.04664	-6.86351	-3.71194	-14.0606
463.5	89.3588	88.7652	80.8226	78.1146	96.513	-0.05435	-0.37664	-0.53283	-0.45436	96.513	-5.04252	-6.85138	-3.6991	-14.0879
466.403	88.8924	88.2476	79.9958	77.321	97.013	-0.05396	-0.37474	-0.5312	-0.45591	97.013	-5.03849	-6.83972	-3.68698	-14.1148
469.307	88.4501	87.7379	79.1576	76.4939	97.513	-0.05354	-0.37265	-0.52945	-0.45742	97.513	-5.03415	-6.826	-3.67435	-14.1402
472.21	88.0471	87.2607	78.3196	75.6292	98.013	-0.05306	-0.3709	-0.52767	-0.45906	98.013	-5.0294	-6.81374	-3.66171	-14.1668
475.113	87.6755	86.8217	77.4925	74.7529	98.513	-0.05248	-0.36903	-0.52584	-0.46052	98.513	-5.02422	-6.79983	-3.64901	-14.1899
478.017	87.3314	86.3906	76.6869	73.8604	99.013	-0.05176	-0.36728	-0.52368	-0.46215	99.013	-5.01864	-6.78594	-3.63435	-14.2156
480.92	87.0067	85.9788	75.8989	72.9802	99.513	-0.05104	-0.36545	-0.52164	-0.46375	99.513	-5.01375	-6.77056	-3.6207	-14.2408
483.823	86.7025	85.5996	75.1279	72.0968	100.013	-0.05013	-0.36388	-0.51937	-0.46525	100.013	-5.00823	-6.7566	-3.60587	-14.2648
486.727	86.4162	85.2401	74.3789	71.2172	100.513	-0.04914	-0.36214	-0.51726	-0.46654	100.513	-5.00303	-6.7402	-3.59229	-14.2858
489.63	86.1467	84.8994	73.6627	70.3645	101.013	-0.04791	-0.36067	-0.51478	-0.46786	101.013	-4.99738	-6.72561	-3.57664	-14.3083
492.533	85.8931	84.5755	72.997	69.5516	101.513	-0.04644	-0.35907	-0.51237	-0.46899	101.513	-4.99153	-6.70895	-3.56164	-14.3289
495.437	85.6436	84.2733	72.3739	68.7726	102.013	-0.04473	-0.35752	-0.50974	-0.47004	102.013	-4.98574	-6.69211	-3.54556	-14.3493
498.34	85.3995	83.9835	71.8049	68.0328	102.513	-0.043	-0.35607	-0.50712	-0.47097	102.513	-4.98066	-6.67571	-3.52986	-14.3697
501.243	85.1786	83.7093	71.274	67.3406	103.013	-0.04102	-0.3547	-0.50447	-0.4717	103.013	-4.97558	-6.65967	-3.51418	-14.3884
504.147	84.9805	83.4504	70.7863	66.6866	103.513	-0.03867	-0.35305	-0.50183	-0.4723	103.513	-4.97033	-6.63961	-3.49882	-14.4073
507.05	84.7931	83.2015	70.3374	66.0923	104.013	-0.03604	-0.35161	-0.49908	-0.47271	104.013	-4.96519	-6.62171	-3.48307	-14.4248
509.953	84.608	82.9648	69.9254	65.542	104.513	-0.03305	-0.35014	-0.49613	-0.47295	104.513	-4.95999	-6.60291	-3.46648	-14.4435
512.857	84.4277	82.7335	69.5432	65.0367	105.013	-0.03018	-0.34859	-0.49304	-0.47298	105.013	-4.95546	-6.58284	-3.44934	-14.4594
515.76	84.2525	82.5087	69.1873	64.5725	105.513	-0.02723	-0.34709	-0.49015	-0.4728	105.513	-4.95115	-6.56312	-3.43352	-14.4761
518.663	84.0849	82.2943	68.8552	64.1398	106.013	-0.02425	-0.34564	-0.48688	-0.47241	106.013	-4.94699	-6.54385	-3.41593	-14.4916
521.567	83.9183	82.0854	68.5403	63.7336	106.513	-0.02136	-0.34404	-0.48389	-0.47181	106.513	-4.94303	-6.52263	-3.40007	-14.5065
524.47	83.7506	81.887	68.2448	63.3598	107.013	-0.01879	-0.34265	-0.48068	-0.47096	107.013	-4.9394	-6.5041	-3.38318	-14.5213
527.373	83.5883	81.6935	67.9616	63.0128	107.513	-0.01638	-0.341	-0.47742	-0.4699	107.513	-4.93575	-6.48215	-3.36624	-14.5351
530.277	83.4345	81.5093	67.6838	62.6912	108.013	-0.01455	-0.33937	-0.474	-0.46868	108.013	-4.93251	-6.46059	-3.34867	-14.5477
533.18	83.2904	81.3248	67.4168	62.382	108.513	-0.01326	-0.33766	-0.47051	-0.46709	108.513	-4.92952	-6.43818	-3.3309	-14.5611
536.083	83.1502	81.1416	67.1706	62.085	109.013	-0.01248	-0.33596	-0.46702	-0.4656	109.013	-4.92658	-6.41623	-3.31325	-14.5716
538.987	83.0093	80.9606	66.9395	61.798	109.513	-0.0123	-0.33428	-0.46353	-0.46368	109.513	-4.92389	-6.39487	-3.29571	-14.5832
541.89	82.8581	80.7802	66.7147	61.5199	110.013	-0.01274	-0.33245	-0.45976	-0.46149	110.013	-4.921	-6.37179	-3.27687	-14.5945
544.793	82.6979	80.6031	66.4986	61.2498	110.513	-0.01371	-0.33059	-0.45597	-0.45928	110.513	-4.91833	-6.34886	-3.25797	-14.6044
547.697	82.5365	80.4282	66.2929	60.9887	111.013	-0.01508	-0.32881	-0.45239	-0.45671	111.013	-4.91579	-6.32719	-3.2401	-14.6144
550.6	82.3821	80.2561	66.0965	60.7365	111.513	-0.01678	-0.32684	-0.44861	-0.45409	111.513	-4.91322	-6.30357	-3.22126	-14.6234
553.503	82.2342	80.0856	65.9169	60.4963	112.013	-0.01873	-0.32481	-0.44485	-0.45119	112.013	-4.91052	-6.27973	-3.20252	-14.6323
556.407	82.0985	79.9171	65.7314	60.2655	112.513	-0.02096	-0.32272	-0.44091	-0.44799	112.513	-4.90746	-6.25565	-3.18276	-14.6409
559.31	81.9737	79.7499	65.5489	60.0443	113.013	-0.02275	-0.32054	-0.43712	-0.44474	113.013	-4.90479	-6.23097	-3.16373	-14.6487
562.213	81.8537	79.5831	65.3688	59.8326	113.513	-0.02445	-0.31853	-0.43284	-0.44158	113.513	-4.90186	-6.20863	-3.14203	-14.6555
565.117	81.7239	79.4166	65.196	59.627	114.013	-0.02591	-0.31621	-0.429	-0.4382	114.013	-4.89866	-6.18327	-3.12248	-14.662
568.02	81.5885	79.2507	65.0271	59.4243	114.513	-0.02696	-0.31398	-0.42528	-0.43471	114.513	-4.89536	-6.15928	-3.10339	-14.6679
570.923	81.4577	79.0841	64.8651	59.2244	115.013	-0.0276	-0.31152	-0.42132	-0.43132	115.013	-4.8916	-6.13323	-3.0829	-14.6731
573.827	81.3331	78.9197	64.707	59.0252	115.513	-0.02769	-0.30906	-0.4176	-0.42769	115.513	-4.88803	-6.10766	-3.06349	-14.6781
576.73	81.2062	78.7568	64.5508	58.8284	116.013	-0.02732	-0.30683	-0.41367	-0.42404	116.013	-4.88444	-6.08477	-3.04273	-14.6825
579.633	81.0724	78.5988	64.3989	58.632	116.513	-0.02641	-0.30424	-0.40966	-0.42029	116.513	-4.88036	-6.05846	-3.02136	-14.6865
582.537	80.9368	78.4476	64.251	58.4408	117.013	-0.02508	-0.30168	-0.40589	-0.41667	117.013	-4.87636	-6.03281	-3.00103	-14.6898
585.44	80.8052	78.2969	64.1016	58.2545	117.513	-0.02332	-0.29934	-0.40193	-0.41291	117.513	-4.87226	-6.00969	-2.97941	-14.6926
588.343	80.6814	78.1478	63.9554	58.0726	118.013	-0.02121	-0.29663	-0.39827	-0.40907	118.013	-4.86812	-5.98312	-2.95918	-14.695
591.247	80.5614	77.996	63.809	57.8953	118.513	-0.01857	-0.29407	-0.39414	-0.40542	118.513	-4.86357	-5.95829	-2.93611	-14.6967
594.15	80.4401	77.8322	63.6616	57.7224	119.013	-0.01621	-0.29137	-0.39057	-0.40222	119.013	-4.85985	-5.93233	-2.91587	-14.6978
597.053	80.3177	77.6637	63.5169	57.5539	119.513	-0.01361	-0.28883	-0.38671	-0.39873	119.513	-4.85596	-5.90804	-2.89372	-14.6985
599.957	80.2026	77.4982	63.374	57.3895	120.013	-0.01089	-0.28586	-0.38289	-0.3951	120.013	-4.85196	-5.87977	-2.87156	-14.6986
602.86	80.0898	77.3318	63.2334	57.2253	120.513	-0.00845	-0.28327	-0.37919	-0.39192	120.513	-4.84834	-5.85525	-2.8498	-14.6982
605.763	79.977	77.1656	63.0965	57.0618	121.013	-0.00607	-0.28045	-0.37525	-0.38855	121.013	-4.84458	-5.82865	-2.82632	-14.6972
608.667	79.8633	77.0038	62.9627	56.8971	121.513	-0.00423	-0.27777	-0.37167	-0.38559	121.513	-4.84131	-5.8035	-2.80467	-14.6957
611.57	79.7463	76.8474	62.8308	56.7288	122.013	-0.00285	-0.27508	-0.36797	-0.38273	122.013	-4.83834	-5.77811	-2.7821	-14.6938
614.473	79.626	76.6919	62.7002	56.5562	122.513	-0.00186	-0.27223	-0.36411	-0.37978	122.513	-4.83544	-5.7513	-2.75823	-14.6911
617.377	79.5084	76.5381	62.5741	56.3832	123.013	-0.00131	-0.2696	-0.36057	-0.37722	123.013	-4.83268	-5.72648	-2.73613	-14.6882
620.28	79.3946	76.3801	62.4515	56.2099	123.513	-0.00117	-0.26674	-0.35678	-0.37444	123.513	-4.83	-5.69947	-2.71219	-14.6842
623.183	79.2807	76.2208	62.331	56.0393	124.013	-0.00142	-0.2642	-0.35299	-0.3721	124.013	-4.82703	-5.67526	-2.68804	-14.6802
626.087	79.1642	76.0605	62.2136	55.8739	124.513	-0.00191	-0.26133	-0.34929	-0.36964	124.513	-4.82439	-5.64787	-2.66422	-14.6753
628.99	79.0489	75.9002	62.0999	55.714	125.013	-0.00257	-0.25874	-0.34572	-0.36749	125.013	-4.82164	-5.62284	-2.64104	-14.6702
631.893	78.9379	75.7377	61.9893	55.5567	125.513	-0.00337	-0.25593	-0.34187	-0.36536	125.513	-4.81865	-5.59559	-2.61591	-14.6643
634.797	78.8315	75.5761	61.8819	55.4039	126.013	-0.00421	-0.25335	-0.33836	-0.36345	126.013	-4.81544	-5.57023	-2.59276	-14.6584
637.7	78.726	75.4169	61.7763	55.255	126.513	-0.00496	-0.25081	-0.33428	-0.36138	126.513	-4.81224	-5.54506	-2.56565	-14.651
640.603	78.6194	75.2586	61.6729	55.1096	127.013	-0.00576	-0.24815	-0.33052	-0.35965	127.013	-4.80825	-5.51834	-2.54044	-14.6441
643.507	78.518	75.101	61.5676	54.9678	127.513	-0.0064	-0.24541	-0.32669	-0.35787	127.513	-4.8041	-5.49054	-2.51466	-14.6361
646.41	78.424	74.9435	61.4641	54.827	128.013	-0.00685	-0.24288	-0.3231	-0.3562	128.013	-4.7998	-5.46444	-2.49029	-14.6279
649.313	78.3258	74.7937	61.3578	54.6867	128.513	-0.00712	-0.24035	-0.31931	-0.35445	128.513	-4.79479	-5.43801	-2.46428	-14.6185
652.217	78.22	74.6455	61.2514	54.5483	129.013	-0.00712	-0.23799	-0.31554	-0.35288	129.013	-4.79022	-5.4131	-2.43827	-14.6095
655.12	78.1112	74.4995	61.1456	54.4105	129.513	-0.00684	-0.23543	-0.31177	-0.35132	129.513	-4.78529	-5.38574	-2.41197	-14.5999
658.023	78.0052	74.3547	61.0413	54.2719	130.013	-0.00625	-0.23309	-0.30767	-0.34973	130.013	-4.78023	-5.36041	-2.38297	-14.5897
660.927	77.8995	74.216	60.9411	54.132	130.513	-0.00536	-0.23075	-0.30406	-0.34818	130.513	-4.77533	-5.33478	-2.35713	-14.5795
663.83	77.7953	74.0823	60.8442	53.9925	131.013	-0.004	-0.22822	-0.30017	-0.34642	131.013	-4.76993	-5.30682	-2.32884	-14.5677
666.733	77.6941	73.9531	60.7546	53.8529	131.513	-0.00241	-0.22594	-0.29668	-0.34487	131.513	-4.76501	-5.28132	-2.30307	-14.5572
669.637	77.6013	73.8231	60.6693	53.7108	132.013	-0.00042974	-0.22363	-0.29281	-0.34314	132.013	-4.75991	-5.25545	-2.27383	-14.5456
672.54	77.5079	73.6917	60.5869	53.5704	132.513	0.00184	-0.2213	-0.28904	-0.3414	132.513	-4.75485	-5.22914	-2.24478	-14.534
675.443	77.4175	73.561	60.5085	53.4332	133.013	0.0043	-0.21896	-0.28588	-0.33933	133.013	-4.74985	-5.20261	-2.21979	-14.5205
678.347	77.3331	73.4251	60.432	53.3015	133.513	0.0068	-0.21666	-0.28223	-0.33735	133.513	-4.74498	-5.17655	-2.19013	-14.508
681.25	77.2512	73.2902	60.3585	53.1746	134.013	0.00911	-0.2146	-0.27898	-0.33505	134.013	-4.7404	-5.15319	-2.16289	-14.4941
684.153	77.1685	73.1566	60.2867	53.0519	134.513	0.01147	-0.21218	-0.27595	-0.33267	134.513	-4.73534	-5.12588	-2.13672	-14.4801
687.057	77.0886	73.0247	60.2184	52.9327	135.013	0.01325	-0.20984	-0.27269	-0.3305	135.013	-4.73089	-5.09954	-2.10749	-14.4679
689.96	77.014	72.8959	60.1528	52.8119	135.513	0.01481	-0.20745	-0.26981	-0.32782	135.513	-4.72589	-5.07276	-2.08069	-14.4534
692.863	76.9425	72.7703	60.0898	52.6956	136.013	0.01592	-0.20498	-0.26699	-0.32501	136.013	-4.72046	-5.04537	-2.05345	-14.4388
695.767	76.8679	72.6501	60.029	52.5824	136.513	0.01643	-0.20266	-0.26427	-0.32216	136.513	-4.71544	-5.01983	-2.026	-14.4246
698.67	76.7867	72.532	59.9687	52.4694	137.013	0.01647	-0.20036	-0.26168	-0.31897	137.013	-4.71027	-4.99472	-1.99878	-14.4094
701.573	76.6998	72.4132	59.9082	52.3567	137.513	0.01607	-0.19787	-0.25924	-0.31565	137.513	-4.70475	-4.96781	-1.97204	-14.3941
704.477	76.6081	72.2953	59.8462	52.2455	138.013	0.01525	-0.19551	-0.25666	-0.31193	138.013	-4.69866	-4.94254	-1.94232	-14.3777
707.38	76.5138	72.1777	59.7828	52.1359	138.513	0.01412	-0.19287	-0.25434	-0.30837	138.513	-4.69244	-4.91454	-1.91437	-14.3626
710.283	76.4189	72.0627	59.718	52.0275	139.013	0.01287	-0.19036	-0.25214	-0.30454	139.013	-4.68635	-4.88816	-1.88655	-14.3468
713.187	76.3265	71.9463	59.6525	51.9206	139.513	0.01143	-0.18798	-0.25009	-0.30051	139.513	-4.67961	-4.86329	-1.85954	-14.3307
716.09	76.2402	71.8314	59.5878	51.8135	140.013	0.00995	-0.18547	-0.24799	-0.29614	140.013	-4.67254	-4.83733	-1.83046	-14.3137
718.993	76.1597	71.7175	59.5245	51.7054	140.513	0.00863	-0.18291	-0.24612	-0.29134	140.513	-4.66576	-4.81111	-1.80349	-14.2956
721.897	76.0777	71.6054	59.4623	51.5966	141.013	0.00736	-0.18041	-0.24427	-0.28667	141.013	-4.65819	-4.78554	-1.77555	-14.2783
724.8	75.9942	71.494	59.4021	51.4888	141.513	0.0064	-0.17784	-0.2424	-0.282	141.513	-4.65107	-4.75949	-1.74611	-14.2614
727.703	75.9161	71.3823	59.3419	51.3828	142.013	0.00572	-0.17514	-0.24059	-0.27736	142.013	-4.64417	-4.73218	-1.71646	-14.2449
730.607	75.8452	71.272	59.2822	51.2774	142.513	0.00531	-0.17274	-0.23911	-0.27206	142.513	-4.63707	-4.70794	-1.69112	-14.2262
733.51	75.7772	71.1639	59.2234	51.1715	143.013	0.00523	-0.17012	-0.23757	-0.26649	143.013	-4.62936	-4.68158	-1.66387	-14.2069
736.413	75.7023	71.0578	59.1645	51.0641	143.513	0.00553	-0.16745	-0.23583	-0.26109	143.513	-4.62208	-4.6548	-1.63179	-14.1883
739.317	75.6228	70.9534	59.1067	50.9579	144.013	0.00621	-0.16488	-0.23436	-0.25564	144.013	-4.61499	-4.62891	-1.6034	-14.1697
742.22	75.5483	70.852	59.0463	50.8525	144.513	0.00713	-0.16216	-0.23303	-0.2506	144.513	-4.60865	-4.60155	-1.57673	-14.1524
745.123	75.4847	70.7527	58.9848	50.7484	145.013	0.00835	-0.15963	-0.23166	-0.24473	145.013	-4.60227	-4.57614	-1.54796	-14.1324
748.027	75.4212	70.6548	58.9238	50.647	145.513	0.00986	-0.15723	-0.23038	-0.23879	145.513	-4.59586	-4.55184	-1.51991	-14.112
750.93	75.3487	70.5598	58.8625	50.5475	146.013	0.0115	-0.15461	-0.22921	-0.2333	146.013	-4.58985	-4.52533	-1.49299	-14.093
753.833	75.2709	70.4632	58.8012	50.4477	146.513	0.01328	-0.15201	-0.22811	-0.22743	146.513	-4.58379	-4.49887	-1.46633	-14.0725
756.737	75.1939	70.3656	58.7437	50.3486	147.013	0.01523	-0.14962	-0.22707	-0.22178	147.013	-4.57741	-4.47451	-1.43919	-14.0526
759.64	75.1171	70.268	58.689	50.2487	147.513	0.01701	-0.14699	-0.22598	-0.21621	147.513	-4.57146	-4.44756	-1.40877	-14.0326
762.543	75.0447	70.1729	58.6358	50.1474	148.013	0.01857	-0.14465	-0.22507	-0.21053	148.013	-4.56583	-4.42329	-1.3812	-14.0119
765.447	74.9796	70.0803	58.5847	50.0464	148.513	0.02012	-0.14229	-0.22426	-0.20462	148.513	-4.55933	-4.39879	-1.35399	-13.9899
768.35	74.9222	69.989	58.5346	49.9484	149.013	0.02124	-0.13989	-0.22356	-0.19911	149.013	-4.5532	-4.37362	-1.32756	-13.9689
771.253	74.8675	69.898	58.4839	49.852	149.513	0.02192	-0.13749	-0.22289	-0.19356	149.513	-4.54749	-4.34819	-1.2986	-13.9471
774.157	74.8154	69.8061	58.4325	49.7574	150.013	0.02219	-0.13511	-0.22235	-0.18832	150.013	-4.5418	-4.32274	-1.27048	-13.926
777.06	74.7642	69.713	58.3798	49.663	150.513	0.02203	-0.13285	-0.22191	-0.18299	150.513	-4.53606	-4.29821	-1.24187	-13.9038
779.963	74.709	69.6189	58.3285	49.5666	151.013	0.02142	-0.13065	-0.22159	-0.1781	151.013	-4.53044	-4.27389	-1.2131	-13.8827
782.867	74.6503	69.5282	58.2793	49.4697	151.513	0.02045	-0.12847	-0.22138	-0.173	151.513	-4.52512	-4.24944	-1.18376	-13.8599
785.77	74.5933	69.4429	58.2343	49.3724	152.013	0.01928	-0.12626	-0.22131	-0.16808	152.013	-4.52045	-4.22416	-1.1568	-13.8369
788.673	74.5373	69.3642	58.1933	49.2758	152.513	0.01775	-0.12427	-0.22134	-0.16347	152.513	-4.51542	-4.20076	-1.12793	-13.8145
791.577	74.4808	69.2902	58.1557	49.1799	153.013	0.01624	-0.12216	-0.2215	-0.15895	153.013	-4.51103	-4.17542	-1.099	-13.7914
794.48	74.4316	69.2186	58.1198	49.0849	153.513	0.01467	-0.12017	-0.22178	-0.15457	153.513	-4.5067	-4.15059	-1.06962	-13.7679
797.383	74.389	69.1479	58.0842	48.9861	154.013	0.01333	-0.11824	-0.22217	-0.15053	154.013	-4.50286	-4.12545	-1.0404	-13.745
800.287	74.3472	69.0735	58.0491	48.8851	154.513	0.01211	-0.11649	-0.22265	-0.14641	154.513	-4.49888	-4.10176	-1.01181	-13.7202
803.19	74.306	68.9967	58.0142	48.7854	155.013	0.01129	-0.11473	-0.22324	-0.14256	155.013	-4.49522	-4.07663	-0.98234	-13.6957
806.093	74.2714	68.9193	57.9796	48.689	155.513	0.01091	-0.11321	-0.22388	-0.1391	155.513	-4.49172	-4.05376	-0.95395	-13.6721
808.997	74.2391	68.8414	57.947	48.5975	156.013	0.01101	-0.1117	-0.22464	-0.13595	156.013	-4.48842	-4.02929	-0.92309	-13.6492
811.9	74.2003	68.7649	57.9168	48.5118	156.513	0.01161	-0.11028	-0.22534	-0.13261	156.513	-4.48511	-4.00448	-0.89633	-13.623
814.803	74.1548	68.6907	57.8896	48.4317	157.013	0.01293	-0.10903	-0.22617	-0.1298	157.013	-4.48121	-3.98056	-0.86593	-13.5992
817.707	74.1096	68.6184	57.8645	48.3548	157.513	0.01458	-0.10789	-0.2269	-0.12701	157.513	-4.47779	-3.95614	-0.83911	-13.5736
820.61	74.0732	68.5489	57.8427	48.278	158.013	0.01669	-0.10688	-0.22769	-0.12467	158.013	-4.47417	-3.93144	-0.81017	-13.5502
823.513	74.0431	68.4818	57.8225	48.2001	158.513	0.01908	-0.10599	-0.22851	-0.12234	158.513	-4.47048	-3.90608	-0.77918	-13.5245
826.417	74.008	68.4163	57.8039	48.121	159.013	0.02153	-0.10533	-0.22924	-0.12019	159.013	-4.46682	-3.88312	-0.74976	-13.4982
829.32	73.9655	68.3524	57.7843	48.0408	159.513	0.02411	-0.10479	-0.22994	-0.11841	159.513	-4.46285	-3.85946	-0.71876	-13.4739
832.223	73.9239	68.289	57.7648	47.9607	160.013	0.0267	-0.10437	-0.23051	-0.11677	160.013	-4.45844	-3.83339	-0.68973	-13.4487
835.127	73.8879	68.2268	57.7454	47.8804	160.513	0.02877	-0.10414	-0.23102	-0.11525	160.513	-4.45414	-3.80872	-0.6592	-13.4222
838.03	73.8525	68.1643	57.7257	47.7987	161.013	0.03027	-0.10408	-0.23142	-0.11402	161.013	-4.44984	-3.78414	-0.62887	-13.3972
840.933	73.8146	68.1035	57.7067	47.7164	161.513	0.03112	-0.10419	-0.23167	-0.11293	161.513	-4.44507	-3.7592	-0.59959	-13.3712
843.837	73.7754	68.0446	57.6883	47.6353	162.013	0.0311	-0.10446	-0.2318	-0.11197	162.013	-4.44076	-3.73462	-0.56725	-13.3433
846.74	73.7386	67.9877	57.6708	47.557	162.513	0.03035	-0.10491	-0.23178	-0.11129	162.513	-4.43651	-3.70926	-0.53828	-13.3187
849.643	73.7117	67.9316	57.6547	47.4823	163.013	0.02862	-0.10555	-0.23158	-0.11071	163.013	-4.43155	-3.68286	-0.50703	-13.2914
852.547	73.6945	67.8796	57.6406	47.4104	163.513	0.02608	-0.10631	-0.23127	-0.11031	163.513	-4.4266	-3.65811	-0.47959	-13.2643
855.45	73.6774	67.8285	57.6294	47.341	164.013	0.02296	-0.10729	-0.23071	-0.11008	164.013	-4.42165	-3.63168	-0.4472	-13.2379
858.353	73.6566	67.7764	57.621	47.2729	164.513	0.0194	-0.1084	-0.23	-0.10998	164.513	-4.41661	-3.60569	-0.41714	-13.2099
861.257	73.6293	67.7238	57.6151	47.2049	165.013	0.0153	-0.10967	-0.2292	-0.11003	165.013	-4.41102	-3.5796	-0.38965	-13.1842
864.16	73.5941	67.6692	57.6104	47.1363	165.513	0.01151	-0.111	-0.22815	-0.11019	165.513	-4.40572	-3.55463	-0.35948	-13.1587
867.063	73.5554	67.6157	57.6052	47.067	166.013	0.00779	-0.11246	-0.22705	-0.11048	166.013	-4.40012	-3.52944	-0.3322	-13.132
869.967	73.5186	67.5599	57.5986	46.9975	166.513	0.004	-0.11412	-0.22576	-0.1109	166.513	-4.39356	-3.50254	-0.30393	-13.1035
872.87	73.4868	67.5036	57.5904	46.9289	167.013	0.00102	-0.11582	-0.22434	-0.11141	167.013	-4.38726	-3.47665	-0.27611	-13.0759
875.773	73.4619	67.4482	57.5811	46.8619	167.513	-0.00136	-0.11766	-0.22285	-0.11202	167.513	-4.38073	-3.44983	-0.24936	-13.0478
878.677	73.4426	67.3926	57.572	46.7978	168.013	-0.00308	-0.1195	-0.22116	-0.11269	168.013	-4.37395	-3.42395	-0.22121	-13.0207
881.58	73.4273	67.3372	57.5644	46.7365	168.513	-0.00416	-0.12145	-0.21939	-0.11348	168.513	-4.36651	-3.39726	-0.19335	-12.9922
884.483	73.4119	67.2843	57.5593	46.6763	169.013	-0.00448	-0.12342	-0.21766	-0.11431	169.013	-4.36016	-3.37074	-0.16744	-12.964
887.387	73.3949	67.2343	57.5568	46.6156	169.513	-0.00426	-0.1253	-0.21572	-0.11512	169.513	-4.35288	-3.3458	-0.13931	-12.9383
890.29	73.3756	67.1867	57.5565	46.5534	170.013	-0.00347	-0.1274	-0.21389	-0.11602	170.013	-4.34566	-3.31786	-0.11338	-12.911
893.193	73.352	67.1408	57.5576	46.4897	170.513	-0.00233	-0.12932	-0.21207	-0.11698	170.513	-4.33913	-3.29207	-0.08757	-12.8826
896.097	73.3313	67.0963	57.5594	46.4255	171.013	-0.00072186	-0.13138	-0.21025	-0.11799	171.013	-4.33215	-3.26408	-0.06168	-12.8538
899	73.336	67.0525	57.5617	46.3616	171.513	0.00103	-0.13315	-0.20863	-0.11896	171.513	-4.32595	-3.23953	-0.03787	-12.8265
--					172.013	0.00316	-0.13519	-0.20684	-0.11995	172.013	-4.31945	-3.2104	-0.0105	-12.799
--					172.513	0.0054	-0.13696	-0.2054	-0.12099	172.513	-4.31338	-3.18394	0.01281	-12.77
--					173.013	0.00779	-0.13872	-0.20403	-0.12202	173.013	-4.30744	-3.15644	0.03704	-12.741
--					173.513	0.01012	-0.14033	-0.2027	-0.12295	173.513	-4.302	-3.12974	0.06333	-12.7147
--					174.013	0.01228	-0.14189	-0.20165	-0.12391	174.013	-4.2971	-3.10219	0.08747	-12.6871
--					174.513	0.01447	-0.14329	-0.20081	-0.1249	174.513	-4.29211	-3.07529	0.11092	-12.6579
--					175.013	0.01656	-0.14459	-0.20013	-0.12585	175.013	-4.28711	-3.04806	0.13534	-12.629
--					175.513	0.01853	-0.14578	-0.19965	-0.12671	175.513	-4.28183	-3.02026	0.16101	-12.6018
--					176.013	0.0198	-0.14678	-0.19943	-0.12753	176.013	-4.27767	-2.99417	0.18609	-12.5754
--					176.513	0.02085	-0.1477	-0.19945	-0.12835	176.513	-4.27298	-2.96656	0.21129	-12.5473
--					177.013	0.02139	-0.14842	-0.19972	-0.12916	177.013	-4.26847	-2.94129	0.23631	-12.5185
--					177.513	0.02141	-0.14905	-0.20014	-0.12987	177.513	-4.2637	-2.91473	0.25747	-12.4923
--					178.013	0.02098	-0.14956	-0.20091	-0.13055	178.013	-4.25978	-2.88802	0.28414	-12.4658
--					178.513	0.01998	-0.14997	-0.20184	-0.13119	178.513	-4.25514	-2.85972	0.3085	-12.4393
--					179.013	0.01861	-0.15023	-0.20303	-0.13181	179.013	-4.25077	-2.83312	0.334	-12.413
--					179.513	0.01685	-0.15038	-0.20433	-0.13237	179.513	-4.24625	-2.80865	0.35783	-12.3877
--					180.013	0.01477	-0.15045	-0.20588	-0.13291	180.013	-4.24158	-2.77992	0.38298	-12.3629
--					180.513	0.01256	-0.15041	-0.20747	-0.13339	180.513	-4.23692	-2.7547	0.40647	-12.3397
--					181.013	0.01039	-0.15029	-0.20918	-0.13388	181.013	-4.23233	-2.72791	0.43	-12.3157
--					181.513	0.00816	-0.15009	-0.21114	-0.13437	181.513	-4.22737	-2.70062	0.45532	-12.2915
--					182.013	0.00618	-0.14983	-0.21306	-0.13488	182.013	-4.22248	-2.67398	0.47903	-12.266
--					182.513	0.0044	-0.14951	-0.21518	-0.13535	182.513	-4.21736	-2.64752	0.50461	-12.2427
--					183.013	0.00293	-0.14915	-0.21708	-0.13581	183.013	-4.21206	-2.62116	0.52717	-12.2204
--					183.513	0.00176	-0.14874	-0.21906	-0.1363	183.513	-4.20639	-2.59492	0.55058	-12.1975
--					184.013	0.00099008	-0.14832	-0.22093	-0.13677	184.013	-4.20062	-2.56952	0.57297	-12.1764
--					184.513	0.0005644	-0.14784	-0.22301	-0.13729	184.513	-4.19465	-2.5426	0.59852	-12.1542
--					185.013	0.00045347	-0.14734	-0.22485	-0.13778	185.013	-4.18807	-2.51575	0.62192	-12.1347
--					185.513	0.00061637	-0.14685	-0.22648	-0.13836	185.513	-4.18156	-2.49033	0.64382	-12.1126
--					186.013	0.00097283	-0.14635	-0.2281	-0.13892	186.013	-4.17485	-2.46509	0.66687	-12.0922
--					186.513	0.00144	-0.14578	-0.22961	-0.13953	186.513	-4.16814	-2.43725	0.69024	-12.0718
--					187.013	0.00198	-0.14527	-0.231	-0.14015	187.013	-4.16106	-2.41259	0.71394	-12.0517
--					187.513	0.00263	-0.14471	-0.23226	-0.14076	187.513	-4.15256	-2.3855	0.73785	-12.033
--					188.013	0.00317	-0.14416	-0.23332	-0.14142	188.013	-4.14497	-2.35998	0.76109	-12.0137
--					188.513	0.00369	-0.14354	-0.23425	-0.1421	188.513	-4.13673	-2.3313	0.78458	-11.9942
--					189.013	0.00413	-0.14299	-0.23502	-0.14282	189.013	-4.12859	-2.30647	0.80763	-11.9742
--					189.513	0.00454	-0.14242	-0.23566	-0.14352	189.513	-4.12026	-2.2811	0.83143	-11.955
--					190.013	0.00493	-0.14178	-0.23618	-0.14424	190.013	-4.11167	-2.25338	0.85501	-11.9352
--					190.513	0.00531	-0.14117	-0.23659	-0.14491	190.513	-4.10324	-2.22765	0.88025	-11.9166
--					191.013	0.00573	-0.14052	-0.23687	-0.14558	191.013	-4.09488	-2.20067	0.90427	-11.8974
--					191.513	0.00622	-0.13986	-0.23706	-0.14624	191.513	-4.08637	-2.17425	0.92866	-11.8775
--					192.013	0.0068	-0.13919	-0.23718	-0.14686	192.013	-4.07775	-2.14817	0.95386	-11.8577
--					192.513	0.00739	-0.13852	-0.23721	-0.14742	192.513	-4.07006	-2.12277	0.97829	-11.8383
--					193.013	0.00813	-0.13772	-0.2372	-0.14792	193.013	-4.06155	-2.09366	1.00378	-11.8188
--					193.513	0.0089	-0.13692	-0.23713	-0.14836	193.513	-4.05334	-2.0652	1.02935	-11.7997
--					194.013	0.00969	-0.13617	-0.23704	-0.14874	194.013	-4.04511	-2.03929	1.05472	-11.7789
--					194.513	0.01052	-0.13535	-0.23692	-0.14905	194.513	-4.03637	-2.01137	1.0794	-11.7574
--					195.013	0.01126	-0.13456	-0.23678	-0.14926	195.013	-4.02827	-1.98533	1.10677	-11.7365
--					195.513	0.01196	-0.13376	-0.23664	-0.14936	195.513	-4.01983	-1.9593	1.13182	-11.7163
--					196.013	0.01266	-0.1329	-0.23649	-0.14938	196.013	-4.01037	-1.93161	1.15908	-11.6944
--					196.513	0.01328	-0.13205	-0.23634	-0.14929	196.513	-4.0008	-1.90458	1.18483	-11.6729
--					197.013	0.01383	-0.13116	-0.2362	-0.14911	197.013	-3.99102	-1.87609	1.21146	-11.6523
--					197.513	0.01433	-0.13032	-0.23605	-0.14884	197.513	-3.98067	-1.84949	1.23727	-11.6311
--					198.013	0.01477	-0.12946	-0.23591	-0.14842	198.013	-3.97027	-1.82182	1.26306	-11.6069
--					198.513	0.01514	-0.12857	-0.23575	-0.14796	198.513	-3.95973	-1.79253	1.29101	-11.5853
--					199.013	0.01547	-0.12772	-0.23559	-0.14736	199.013	-3.94826	-1.76397	1.31692	-11.5615
--					199.513	0.01569	-0.12698	-0.2354	-0.14669	199.513	-3.9373	-1.73832	1.34531	-11.5382
--					200.013	0.01579	-0.12624	-0.23521	-0.14591	200.013	-3.92554	-1.7118	1.37122	-11.5134
--					200.513	0.01571	-0.12548	-0.23499	-0.14515	200.513	-3.91468	-1.68296	1.39752	-11.4913
--					201.013	0.0154	-0.12482	-0.23475	-0.14427	201.013	-3.90287	-1.65647	1.42329	-11.467
--					201.513	0.01487	-0.12416	-0.23444	-0.14332	201.513	-3.89201	-1.62802	1.45166	-11.442
--					202.013	0.01408	-0.12357	-0.23409	-0.14238	202.013	-3.88145	-1.60013	1.48048	-11.418
--					202.513	0.01293	-0.12306	-0.23372	-0.14139	202.513	-3.87029	-1.5738	1.50778	-11.393
--					203.013	0.01165	-0.12255	-0.23328	-0.14036	203.013	-3.86056	-1.54456	1.53632	-11.3673
--					203.513	0.00999	-0.12214	-0.2328	-0.13939	203.513	-3.85006	-1.5179	1.56508	-11.3427
--					204.013	0.0081	-0.12177	-0.23231	-0.13842	204.013	-3.8396	-1.48932	1.59246	-11.3174
--					204.513	0.0064	-0.12147	-0.23175	-0.13747	204.513	-3.83076	-1.46274	1.622	-11.2921
--					205.013	0.00462	-0.12122	-0.23114	-0.13653	205.013	-3.82161	-1.43433	1.65236	-11.2657
--					205.513	0.00285	-0.12102	-0.23052	-0.13573	205.513	-3.81181	-1.4069	1.68208	-11.2416
--					206.013	0.00169	-0.12088	-0.22986	-0.1349	206.013	-3.80427	-1.37886	1.71339	-11.2152
--					206.513	0.00074494	-0.12079	-0.22922	-0.13414	206.513	-3.79633	-1.35229	1.74379	-11.1882
--					207.013	0.00014081	-0.12073	-0.22855	-0.1335	207.013	-3.78774	-1.32266	1.77595	-11.1627
--					207.513	1.2577e-05	-0.12072	-0.22785	-0.13294	207.513	-3.78015	-1.29617	1.81002	-11.1375
--					208.013	0.00031277	-0.12074	-0.22721	-0.13243	208.013	-3.77191	-1.26828	1.84263	-11.1107
--					208.513	0.0009935	-0.1208	-0.2266	-0.13206	208.513	-3.764	-1.23929	1.87567	-11.0874
--					209.013	0.00197	-0.12088	-0.22602	-0.13176	209.013	-3.75616	-1.20965	1.90997	-11.0634
--					209.513	0.00317	-0.12096	-0.22546	-0.13151	209.513	-3.74815	-1.1845	1.94529	-11.0376
--					210.013	0.00445	-0.12107	-0.22498	-0.13133	210.013	-3.73994	-1.15586	1.97969	-11.0093
--					210.513	0.00564	-0.12118	-0.22453	-0.13124	210.513	-3.73174	-1.12816	2.01766	-10.9843
--					211.013	0.00653	-0.12129	-0.22419	-0.13122	211.013	-3.72389	-1.10068	2.05089	-10.96
--					211.513	0.00712	-0.12141	-0.22389	-0.13125	211.513	-3.71515	-1.0715	2.08723	-10.934
--					212.013	0.00717	-0.12151	-0.22367	-0.13132	212.013	-3.70689	-1.04424	2.12207	-10.9099
--					212.513	0.00666	-0.12161	-0.22352	-0.13142	212.513	-3.69837	-1.01822	2.15793	-10.8843
--					213.013	0.0056	-0.1217	-0.22344	-0.13154	213.013	-3.68996	-0.99033	2.19533	-10.8608
--					213.513	0.00377	-0.12178	-0.22343	-0.13167	213.513	-3.68052	-0.96259	2.23081	-10.8354
--					214.013	0.00155	-0.12185	-0.22349	-0.13178	214.013	-3.67161	-0.9329	2.26345	-10.8124
--					214.513	-0.0015	-0.1219	-0.22361	-0.13188	214.513	-3.66115	-0.90568	2.29982	-10.7882
--					215.013	-0.00472	-0.12194	-0.22377	-0.13195	215.013	-3.65096	-0.87865	2.33151	-10.7652
--					215.513	-0.00783	-0.12197	-0.22399	-0.13197	215.513	-3.64116	-0.85012	2.36421	-10.7408
--					216.013	-0.01071	-0.12198	-0.22426	-0.13193	216.013	-3.63154	-0.8224	2.39829	-10.7167
--					216.513	-0.0134	-0.12198	-0.22455	-0.13183	216.513	-3.62123	-0.79626	2.43088	-10.6946
--					217.013	-0.01548	-0.12198	-0.22483	-0.13163	217.013	-3.61125	-0.76767	2.45867	-10.6706
--					217.513	-0.01689	-0.12196	-0.22516	-0.13136	217.513	-3.60148	-0.7411	2.48854	-10.6479
--					218.013	-0.01764	-0.12193	-0.22547	-0.13102	218.013	-3.59163	-0.71237	2.51687	-10.6265
--					218.513	-0.0177	-0.12189	-0.2258	-0.13054	218.513	-3.58155	-0.68395	2.54546	-10.6034
--					219.013	-0.01696	-0.12184	-0.22611	-0.12996	219.013	-3.57039	-0.65519	2.57259	-10.5809
--					219.513	-0.01555	-0.12179	-0.22638	-0.1293	219.513	-3.5594	-0.62834	2.59662	-10.5592
--					220.013	-0.0138	-0.12171	-0.22664	-0.12849	220.013	-3.54928	-0.6	2.6212	-10.537
--					220.513	-0.01176	-0.12163	-0.22687	-0.12757	220.513	-3.53902	-0.57307	2.64553	-10.5147
--					221.013	-0.00968	-0.12152	-0.22707	-0.12663	221.013	-3.52893	-0.54379	2.66822	-10.4946
--					221.513	-0.00745	-0.12141	-0.22724	-0.1255	221.513	-3.51767	-0.51698	2.69044	-10.4727
--					222.013	-0.00554	-0.12127	-0.22737	-0.12426	222.013	-3.50679	-0.48856	2.71293	-10.4509
--					222.513	-0.00399	-0.12112	-0.22746	-0.12307	222.513	-3.49614	-0.46206	2.73264	-10.4315
--					223.013	-0.00276	-0.12093	-0.22753	-0.12176	223.013	-3.48527	-0.43316	2.75343	-10.4115
--					223.513	-0.00179	-0.12072	-0.22757	-0.12045	223.513	-3.47353	-0.40449	2.77403	-10.3926
--					224.013	-0.00109	-0.1205	-0.22759	-0.11896	224.013	-3.46151	-0.37744	2.79484	-10.372
--					224.513	-0.00059645	-0.12023	-0.22759	-0.11738	224.513	-3.45079	-0.34863	2.81511	-10.351
--					225.013	-5.9615e-05	-0.11996	-0.22757	-0.1159	225.013	-3.43904	-0.32249	2.83517	-10.3317
--					225.513	0.00062927	-0.11963	-0.22756	-0.11447	225.513	-3.42703	-0.2939	2.85417	-10.3135
--					226.013	0.00162	-0.1193	-0.22754	-0.1129	226.013	-3.41474	-0.26737	2.87517	-10.2935
--					226.513	0.00297	-0.11891	-0.22753	-0.11144	226.513	-3.40285	-0.23879	2.89691	-10.2748
--					227.013	0.0046	-0.1185	-0.22755	-0.11003	227.013	-3.39186	-0.21028	2.91861	-10.2563
--					227.513	0.00678	-0.11807	-0.22758	-0.10859	227.513	-3.38016	-0.18226	2.93927	-10.237
--					228.013	0.00929	-0.11763	-0.22765	-0.10732	228.013	-3.36889	-0.15534	2.96149	-10.2192
--					228.513	0.01217	-0.11716	-0.22776	-0.10607	228.513	-3.35749	-0.12843	2.98613	-10.2007
--					229.013	0.01485	-0.11667	-0.22791	-0.10499	229.013	-3.3476	-0.10101	3.00917	-10.1834
--					229.513	0.01777	-0.11614	-0.2281	-0.10388	229.513	-3.33712	-0.07235	3.03095	-10.1639
--					230.013	0.02049	-0.11562	-0.22836	-0.10297	230.013	-3.32712	-0.04482	3.05488	-10.1461
--					230.513	0.02294	-0.11508	-0.2287	-0.10218	230.513	-3.31739	-0.01708	3.08049	-10.128
--					231.013	0.0249	-0.1145	-0.2291	-0.10153	231.013	-3.30851	0.01211	3.10628	-10.1103
--					231.513	0.02653	-0.11395	-0.22957	-0.10098	231.513	-3.29961	0.03888	3.13128	-10.091
--					232.013	0.02786	-0.11337	-0.23012	-0.10061	232.013	-3.29004	0.0673	3.15724	-10.0732
--					232.513	0.02869	-0.1128	-0.23073	-0.10038	232.513	-3.2815	0.09475	3.18235	-10.0546
--					233.013	0.02925	-0.1122	-0.23143	-0.10032	233.013	-3.27236	0.12335	3.20827	-10.0354
--					233.513	0.02953	-0.1116	-0.23217	-0.10042	233.513	-3.26311	0.15159	3.23261	-10.0166
--					234.013	0.02962	-0.11099	-0.23307	-0.10068	234.013	-3.25364	0.17999	3.25956	-9.9976
--					234.513	0.02958	-0.11036	-0.23397	-0.10108	234.513	-3.2441	0.2084	3.28424	-9.97971
--					235.013	0.02947	-0.10971	-0.23503	-0.10168	235.013	-3.23368	0.23748	3.31072	-9.95976
--					235.513	0.02936	-0.10902	-0.23617	-0.10242	235.513	-3.22326	0.26768	3.33718	-9.94059
--					236.013	0.02931	-0.10836	-0.23736	-0.10336	236.013	-3.21273	0.29561	3.3625	-9.9201
--					236.513	0.02939	-0.10766	-0.23863	-0.10447	236.513	-3.20032	0.3242	3.38792	-9.89955
--					237.013	0.02962	-0.10692	-0.23998	-0.10572	237.013	-3.18915	0.35359	3.41344	-9.87898
--					237.513	0.03004	-0.10619	-0.2414	-0.10713	237.513	-3.17748	0.38159	3.43872	-9.85812
--					238.013	0.03067	-0.10535	-0.2429	-0.10867	238.013	-3.16523	0.41287	3.46425	-9.8371
--					238.513	0.03153	-0.10455	-0.24446	-0.11045	238.513	-3.1525	0.44155	3.48947	-9.81463
--					239.013	0.03251	-0.1037	-0.24599	-0.11208	239.013	-3.14036	0.47108	3.51335	-9.79525
--					239.513	0.03367	-0.10287	-0.24766	-0.11406	239.513	-3.12727	0.49916	3.53879	-9.77282
--					240.013	0.03481	-0.10194	-0.24942	-0.11599	240.013	-3.11438	0.52968	3.56462	-9.75182
--					240.513	0.03591	-0.10103	-0.25106	-0.11821	240.513	-3.10086	0.55919	3.58839	-9.72853
--					241.013	0.03672	-0.1001	-0.25294	-0.12026	241.013	-3.08768	0.58928	3.61512	-9.7076
--					241.513	0.03714	-0.09918	-0.25467	-0.12262	241.513	-3.07493	0.61886	3.63961	-9.68402
--					242.013	0.03706	-0.09825	-0.25631	-0.12512	242.013	-3.06158	0.64897	3.66284	-9.65941
--					242.513	0.03642	-0.09735	-0.25808	-0.12738	242.513	-3.04938	0.67896	3.68811	-9.6374
--					243.013	0.03502	-0.0965	-0.25963	-0.1298	243.013	-3.03576	0.70814	3.71068	-9.61391
--					243.513	0.03283	-0.09569	-0.26115	-0.13231	243.513	-3.02186	0.73764	3.73326	-9.58952
--					244.013	0.03027	-0.09487	-0.26266	-0.13483	244.013	-3.00943	0.76936	3.75664	-9.56499
--					244.513	0.02725	-0.09419	-0.26403	-0.13717	244.513	-2.99711	0.7986	3.77879	-9.5419
--					245.013	0.02382	-0.0936	-0.26535	-0.13959	245.013	-2.98447	0.82706	3.80146	-9.51769
--					245.513	0.02044	-0.09308	-0.26652	-0.14198	245.513	-2.97253	0.85618	3.82329	-9.49349
--					246.013	0.01678	-0.09263	-0.26757	-0.14428	246.013	-2.95937	0.88762	3.84498	-9.46965
--					246.513	0.01385	-0.09231	-0.26851	-0.14659	246.513	-2.94795	0.91889	3.86728	-9.4452
--					247.013	0.01106	-0.09212	-0.26921	-0.14878	247.013	-2.93527	0.94826	3.88653	-9.4214
--					247.513	0.00911	-0.09204	-0.26985	-0.15093	247.513	-2.92371	0.97922	3.90868	-9.39733
--					248.013	0.00769	-0.0921	-0.27028	-0.15312	248.013	-2.91097	1.01005	3.92874	-9.37215
--					248.513	0.00711	-0.09228	-0.27057	-0.15519	248.513	-2.89936	1.0387	3.95043	-9.34753
--					249.013	0.00719	-0.09259	-0.27068	-0.15717	249.013	-2.88757	1.06951	3.97058	-9.32329
--					249.513	0.00791	-0.093	-0.27063	-0.15899	249.513	-2.87502	1.09803	3.9899	-9.30017
--					250.013	0.00904	-0.09354	-0.27042	-0.16079	250.013	-2.86317	1.12824	4.01027	-9.27665
--					250.513	0.01052	-0.09419	-0.27007	-0.16246	250.513	-2.85063	1.15832	4.03017	-9.25413
--					251.013	0.01212	-0.09492	-0.26964	-0.1642	251.013	-2.83796	1.18837	4.04843	-9.23007
--					251.513	0.01364	-0.09573	-0.26902	-0.16572	251.513	-2.82494	1.21804	4.06931	-9.20828
--					252.013	0.01485	-0.09655	-0.26834	-0.16731	252.013	-2.81185	1.24604	4.08903	-9.18508
--					252.513	0.01555	-0.09748	-0.2675	-0.16883	252.513	-2.79942	1.27661	4.11068	-9.16243
--					253.013	0.0157	-0.09847	-0.26673	-0.17019	253.013	-2.78653	1.30761	4.12934	-9.14182
--					253.513	0.01513	-0.09937	-0.26583	-0.17152	253.513	-2.77273	1.33577	4.1506	-9.12143
--					254.013	0.01383	-0.10029	-0.26503	-0.17269	254.013	-2.75955	1.3646	4.16932	-9.10344
--					254.513	0.01178	-0.10121	-0.26412	-0.17404	254.513	-2.74629	1.39389	4.19106	-9.08273
--					255.013	0.00902	-0.10212	-0.26328	-0.17527	255.013	-2.733	1.4246	4.21213	-9.06406
--					255.513	0.00543	-0.10289	-0.26256	-0.17646	255.513	-2.71897	1.45207	4.2321	-9.04619
--					256.013	0.00148	-0.10367	-0.26188	-0.17763	256.013	-2.7056	1.4822	4.25337	-9.02881
--					256.513	-0.00299	-0.10433	-0.26132	-0.17874	256.513	-2.69172	1.5105	4.27436	-9.01281
--					257.013	-0.00736	-0.10491	-0.26089	-0.17991	257.013	-2.67863	1.53932	4.29618	-8.99643
--					257.513	-0.01153	-0.10544	-0.26063	-0.18101	257.513	-2.66594	1.56977	4.31705	-8.98132
--					258.013	-0.01553	-0.10586	-0.26054	-0.18211	258.013	-2.65283	1.59998	4.33903	-8.96659
--					258.513	-0.0187	-0.10616	-0.26067	-0.18316	258.513	-2.6408	1.62904	4.36166	-8.95294
--					259.013	-0.02142	-0.10637	-0.26102	-0.18417	259.013	-2.62737	1.65825	4.38329	-8.94001
--					259.513	-0.02291	-0.1065	-0.26159	-0.18518	259.513	-2.61532	1.68993	4.40421	-8.92734
--					260.013	-0.02335	-0.10652	-0.26244	-0.18619	260.013	-2.60396	1.71986	4.42622	-8.91461
--					260.513	-0.02276	-0.10644	-0.2635	-0.18713	260.513	-2.59245	1.75145	4.44713	-8.90282
--					261.013	-0.02106	-0.1063	-0.26485	-0.18808	261.013	-2.58063	1.78102	4.46845	-8.89081
--					261.513	-0.01871	-0.10608	-0.26637	-0.18898	261.513	-2.57	1.8111	4.48835	-8.87901
--					262.013	-0.01534	-0.1058	-0.26829	-0.18975	262.013	-2.55811	1.84117	4.50983	-8.86831
--					262.513	-0.01185	-0.10546	-0.2706	-0.19049	262.513	-2.54715	1.87172	4.53213	-8.85755
--					263.013	-0.00819	-0.10506	-0.27307	-0.19118	263.013	-2.53588	1.9028	4.55301	-8.84648
--					263.513	-0.00463	-0.10461	-0.27568	-0.19176	263.513	-2.52401	1.93542	4.57281	-8.83587
--					264.013	-0.00187	-0.10421	-0.27868	-0.19228	264.013	-2.51281	1.96331	4.5933	-8.82498
--					264.513	0.00018641	-0.10372	-0.28183	-0.19268	264.513	-2.50139	1.99598	4.61298	-8.8144
--					265.013	0.00139	-0.10326	-0.28526	-0.193	265.013	-2.48971	2.02555	4.63259	-8.80373
--					265.513	0.00175	-0.1028	-0.28918	-0.19322	265.513	-2.47876	2.05569	4.65327	-8.79248
--					266.013	0.00138	-0.10234	-0.29307	-0.19333	266.013	-2.46655	2.08593	4.67231	-8.78108
--					266.513	0.00032654	-0.1019	-0.29698	-0.19333	266.513	-2.45342	2.11634	4.69016	-8.76958
--					267.013	-0.00107	-0.10147	-0.30117	-0.19322	267.013	-2.44052	2.14651	4.70814	-8.75836
--					267.513	-0.00271	-0.10105	-0.30585	-0.19301	267.513	-2.42625	2.17746	4.727	-8.74622
--					268.013	-0.00401	-0.10067	-0.31017	-0.1927	268.013	-2.41336	2.20836	4.74343	-8.73437
--					268.513	-0.00505	-0.1003	-0.31474	-0.19231	268.513	-2.39867	2.23963	4.75991	-8.72253
--					269.013	-0.00546	-0.09999	-0.31954	-0.19182	269.013	-2.38492	2.26967	4.77637	-8.70973
--					269.513	-0.00514	-0.0997	-0.32438	-0.19129	269.513	-2.36888	2.30055	4.79219	-8.69746
--					270.013	-0.00417	-0.09944	-0.32926	-0.19073	270.013	-2.35468	2.33081	4.80742	-8.68543
--					270.513	-0.0025	-0.09922	-0.33427	-0.1901	270.513	-2.33952	2.36177	4.82246	-8.67239
--					271.013	-0.00035469	-0.09903	-0.33936	-0.18944	271.013	-2.32438	2.39309	4.83721	-8.65914
--					271.513	0.00207	-0.09888	-0.34408	-0.18878	271.513	-2.30919	2.42196	4.85049	-8.64574
--					272.013	0.00447	-0.09874	-0.34856	-0.18816	272.013	-2.29435	2.45409	4.8628	-8.63247
--					272.513	0.0067	-0.09865	-0.35303	-0.18754	272.513	-2.27909	2.48379	4.8749	-8.61854
--					273.013	0.00843	-0.09857	-0.35776	-0.18702	273.013	-2.26405	2.51368	4.88759	-8.60503
--					273.513	0.00941	-0.09852	-0.36224	-0.18657	273.513	-2.25022	2.5429	4.89961	-8.59143
--					274.013	0.00966	-0.09848	-0.36627	-0.18622	274.013	-2.23492	2.57286	4.91054	-8.57806
--					274.513	0.00897	-0.09845	-0.37047	-0.18599	274.513	-2.22008	2.6043	4.92216	-8.56412
--					275.013	0.00743	-0.09842	-0.37403	-0.1859	275.013	-2.20611	2.63444	4.93234	-8.55044
--					275.513	0.00499	-0.09841	-0.37794	-0.18597	275.513	-2.19155	2.66595	4.94405	-8.53748
--					276.013	0.00199	-0.09838	-0.38132	-0.18622	276.013	-2.17783	2.69689	4.95483	-8.52352
--					276.513	-0.00167	-0.09836	-0.38445	-0.18669	276.513	-2.16367	2.7279	4.96561	-8.50915
--					277.013	-0.0056	-0.09832	-0.38738	-0.18737	277.013	-2.14984	2.75833	4.9767	-8.49522
--					277.513	-0.00992	-0.09828	-0.39018	-0.18821	277.513	-2.13527	2.79049	4.98855	-8.48246
--					278.013	-0.01413	-0.09821	-0.39262	-0.18937	278.013	-2.12099	2.82207	5.0004	-8.46871
--					278.513	-0.01817	-0.09814	-0.39462	-0.19071	278.513	-2.10658	2.85208	5.01166	-8.45569
--					279.013	-0.02184	-0.09806	-0.39653	-0.19231	279.013	-2.09235	2.88145	5.02438	-8.44265
--					279.513	-0.02527	-0.09796	-0.3981	-0.19423	279.513	-2.0772	2.91275	5.03712	-8.42931
--					280.013	-0.02795	-0.09786	-0.39935	-0.1963	280.013	-2.06337	2.94319	5.0498	-8.4168
--					280.513	-0.03029	-0.09774	-0.4004	-0.19879	280.513	-2.0488	2.97579	5.06371	-8.40352
--					281.013	-0.0322	-0.09762	-0.40117	-0.20139	281.013	-2.03385	3.00576	5.07787	-8.39112
--					281.513	-0.03365	-0.09752	-0.40169	-0.20433	281.513	-2.01917	3.03608	5.09223	-8.37838
--					282.013	-0.03472	-0.09741	-0.40197	-0.20755	282.013	-2.00472	3.06854	5.10702	-8.36563
--					282.513	-0.03558	-0.09733	-0.40205	-0.21084	282.513	-1.98867	3.10041	5.12236	-8.35362
--					283.013	-0.03608	-0.09728	-0.40194	-0.21456	283.013	-1.97505	3.13295	5.1378	-8.34094
--					283.513	-0.03647	-0.09727	-0.40166	-0.21832	283.513	-1.95966	3.16368	5.15381	-8.32891
--					284.013	-0.03669	-0.0973	-0.40123	-0.22242	284.013	-1.94467	3.19399	5.17026	-8.31649
--					284.513	-0.03677	-0.09739	-0.40064	-0.2268	284.513	-1.93064	3.2241	5.18786	-8.30382
--					285.013	-0.03673	-0.09754	-0.4	-0.23092	285.013	-1.91697	3.25457	5.20461	-8.2924
--					285.513	-0.03652	-0.09776	-0.3993	-0.23543	285.513	-1.90212	3.28466	5.22156	-8.28032
--					286.013	-0.03614	-0.09806	-0.39855	-0.24011	286.013	-1.88817	3.31452	5.23864	-8.2681
--					286.513	-0.03552	-0.09849	-0.39778	-0.24512	286.513	-1.87392	3.347	5.25642	-8.25537
--					287.013	-0.0347	-0.09897	-0.39702	-0.24992	287.013	-1.86036	3.37676	5.27417	-8.2434
--					287.513	-0.03354	-0.09958	-0.39627	-0.25467	287.513	-1.84572	3.40771	5.29268	-8.23169
--					288.013	-0.03219	-0.10025	-0.3956	-0.25966	288.013	-1.83166	3.43692	5.31093	-8.21951
--					288.513	-0.03066	-0.10105	-0.39497	-0.26449	288.513	-1.81775	3.46666	5.33032	-8.20779
--					289.013	-0.02898	-0.10195	-0.39444	-0.26928	289.013	-1.80364	3.49667	5.34981	-8.19617
--					289.513	-0.02722	-0.10301	-0.39407	-0.27445	289.513	-1.78924	3.52799	5.36726	-8.18358
--					290.013	-0.02552	-0.1041	-0.39377	-0.27916	290.013	-1.77469	3.55703	5.38762	-8.17204
--					290.513	-0.02394	-0.1053	-0.39363	-0.28412	290.513	-1.75973	3.58634	5.40656	-8.15975
--					291.013	-0.02266	-0.10653	-0.39362	-0.28849	291.013	-1.74508	3.61453	5.42545	-8.14878
--					291.513	-0.02166	-0.1079	-0.39376	-0.29293	291.513	-1.72923	3.64397	5.44489	-8.13741
--					292.013	-0.02113	-0.1093	-0.39403	-0.29751	292.013	-1.71392	3.67247	5.46356	-8.12544
--					292.513	-0.02109	-0.11083	-0.39446	-0.30157	292.513	-1.69896	3.70228	5.48197	-8.11451
--					293.013	-0.02154	-0.11241	-0.39509	-0.30588	293.013	-1.68343	3.7322	5.50201	-8.10254
--					293.513	-0.02248	-0.1139	-0.39579	-0.30951	293.513	-1.66808	3.75963	5.51922	-8.09208
--					294.013	-0.024	-0.11551	-0.39672	-0.31303	294.013	-1.65177	3.78866	5.53795	-8.0815
--					294.513	-0.02587	-0.11709	-0.39779	-0.31616	294.513	-1.6363	3.81714	5.5557	-8.07166
--					295.013	-0.02833	-0.11867	-0.39903	-0.31951	295.013	-1.61939	3.84547	5.57336	-8.06053
--					295.513	-0.03089	-0.12012	-0.40041	-0.32232	295.513	-1.60382	3.87182	5.59032	-8.0506
--					296.013	-0.03361	-0.12174	-0.40181	-0.32503	296.013	-1.58834	3.90169	5.60546	-8.04028
--					296.513	-0.03648	-0.12324	-0.40353	-0.32729	296.513	-1.57262	3.92991	5.622	-8.03103
--					297.013	-0.03938	-0.12475	-0.4053	-0.32943	297.013	-1.55669	3.95922	5.63726	-8.02142
--					297.513	-0.0421	-0.12618	-0.40724	-0.33128	297.513	-1.54126	3.98794	5.65243	-8.01228
--					298.013	-0.04485	-0.12751	-0.40934	-0.33298	298.013	-1.52456	4.016	5.6675	-8.00286
--					298.513	-0.04711	-0.12886	-0.41144	-0.33438	298.513	-1.50927	4.04593	5.68158	-7.99407
--					299.013	-0.0491	-0.13014	-0.41374	-0.33562	299.013	-1.49365	4.07605	5.69609	-7.98513
--					299.513	-0.05085	-0.13125	-0.41617	-0.33666	299.513	-1.47629	4.10371	5.71068	-7.97625
--					300.013	-0.05198	-0.13229	-0.41879	-0.3375	300.013	-1.46054	4.13173	5.72584	-7.96776
--					300.513	-0.05265	-0.13328	-0.42131	-0.33821	300.513	-1.44424	4.15996	5.74013	-7.95909
--					301.013	-0.05279	-0.13425	-0.424	-0.33877	301.013	-1.42799	4.19015	5.75516	-7.95044
--					301.513	-0.05241	-0.13506	-0.42698	-0.33922	301.513	-1.41185	4.21753	5.77181	-7.94171
--					302.013	-0.05158	-0.13592	-0.42966	-0.33954	302.013	-1.39615	4.24886	5.78687	-7.93376
--					302.513	-0.05025	-0.13663	-0.43287	-0.33982	302.513	-1.37925	4.27736	5.80514	-7.92513
--					303.013	-0.04868	-0.13728	-0.43603	-0.34005	303.013	-1.36372	4.30629	5.82345	-7.91627
--					303.513	-0.04686	-0.13792	-0.43907	-0.34024	303.513	-1.34795	4.33676	5.84151	-7.90759
--					304.013	-0.04507	-0.1385	-0.4424	-0.34043	304.013	-1.33351	4.36773	5.86187	-7.8992
--					304.513	-0.04298	-0.139	-0.44569	-0.34064	304.513	-1.31688	4.3964	5.88259	-7.89053
--					305.013	-0.04101	-0.1395	-0.44885	-0.34089	305.013	-1.30065	4.42814	5.90305	-7.88146
--					305.513	-0.03917	-0.1399	-0.45238	-0.34121	305.513	-1.28425	4.4557	5.92672	-7.8725
--					306.013	-0.03765	-0.14034	-0.45547	-0.3416	306.013	-1.26893	4.48721	5.94806	-7.86338
--					306.513	-0.03628	-0.14073	-0.45872	-0.34207	306.513	-1.2529	4.517	5.97127	-7.85449
--					307.013	-0.03513	-0.14112	-0.46207	-0.34269	307.013	-1.23641	4.54836	5.99588	-7.84502
--					307.513	-0.03421	-0.14149	-0.46526	-0.34339	307.513	-1.21951	4.57787	6.02003	-7.83593
--					308.013	-0.03347	-0.14185	-0.46872	-0.34433	308.013	-1.20172	4.6077	6.04706	-7.82565
--					308.513	-0.03294	-0.14222	-0.47201	-0.34533	308.513	-1.18436	4.63653	6.07362	-7.81626
--					309.013	-0.03254	-0.1426	-0.47507	-0.34659	309.013	-1.16803	4.66611	6.09897	-7.80593
--					309.513	-0.03217	-0.143	-0.47816	-0.34792	309.513	-1.15038	4.69605	6.12542	-7.79628
--					310.013	-0.03179	-0.14344	-0.48104	-0.34959	310.013	-1.13296	4.72636	6.15065	-7.78551
--					310.513	-0.03136	-0.14391	-0.48423	-0.35127	310.513	-1.11484	4.75746	6.17952	-7.77582
--					311.013	-0.03081	-0.1444	-0.4871	-0.3531	311.013	-1.09646	4.78769	6.20618	-7.76617
--					311.513	-0.03018	-0.14491	-0.48987	-0.35532	311.513	-1.07882	4.81692	6.23275	-7.75548
--					312.013	-0.02943	-0.14548	-0.49259	-0.35745	312.013	-1.0608	4.84809	6.25966	-7.74605
--					312.513	-0.02857	-0.14607	-0.49513	-0.36001	312.513	-1.04231	4.87874	6.2856	-7.73556
--					313.013	-0.02766	-0.14671	-0.49745	-0.36273	313.013	-1.02391	4.90986	6.31019	-7.72523
--					313.513	-0.02675	-0.14733	-0.49962	-0.36524	313.513	-1.00519	4.93955	6.33397	-7.71635
--					314.013	-0.02592	-0.14797	-0.50168	-0.36804	314.013	-0.9865	4.96844	6.3575	-7.70699
--					314.513	-0.02519	-0.14869	-0.50365	-0.37112	314.513	-0.96697	5.00079	6.38106	-7.69737
--					315.013	-0.02474	-0.14933	-0.5054	-0.37425	315.013	-0.94983	5.02962	6.40321	-7.68809
--					315.513	-0.02447	-0.15001	-0.50704	-0.37746	315.513	-0.93063	5.05998	6.4254	-7.67909
--					316.013	-0.02447	-0.15071	-0.50844	-0.38069	316.013	-0.91382	5.09162	6.44583	-7.67047
--					316.513	-0.02474	-0.15131	-0.50965	-0.38405	316.513	-0.89606	5.12011	6.46527	-7.6619
--					317.013	-0.02526	-0.15193	-0.51077	-0.38727	317.013	-0.87936	5.15049	6.48527	-7.65401
--					317.513	-0.02605	-0.15253	-0.51167	-0.39032	317.513	-0.86273	5.18214	6.50378	-7.64677
--					318.013	-0.02707	-0.15307	-0.51241	-0.39406	318.013	-0.84706	5.21343	6.52173	-7.63815
--					318.513	-0.02849	-0.15353	-0.51298	-0.39742	318.513	-0.83056	5.24277	6.53943	-7.63062
--					319.013	-0.03014	-0.15395	-0.51337	-0.4006	319.013	-0.81549	5.2739	6.55635	-7.62358
--					319.513	-0.0322	-0.15431	-0.5136	-0.40376	319.513	-0.80035	5.30631	6.5724	-7.61663
--					320.013	-0.03469	-0.15458	-0.5137	-0.40696	320.013	-0.78543	5.33687	6.58935	-7.60958
--					320.513	-0.03755	-0.15477	-0.51365	-0.41001	320.513	-0.77123	5.36687	6.60447	-7.60281
--					321.013	-0.04095	-0.1549	-0.51348	-0.41271	321.013	-0.75693	5.39928	6.62058	-7.59668
--					321.513	-0.0449	-0.15495	-0.5132	-0.41551	321.513	-0.74249	5.43079	6.63661	-7.59012
--					322.013	-0.04923	-0.15493	-0.51283	-0.41824	322.013	-0.72824	5.4613	6.65182	-7.58342
--					322.513	-0.05378	-0.15483	-0.51234	-0.4204	322.513	-0.7143	5.49422	6.66863	-7.57782
--					323.013	-0.0584	-0.15469	-0.51179	-0.42254	323.013	-0.7006	5.52503	6.6852	-7.57191
--					323.513	-0.06346	-0.15448	-0.51121	-0.42471	323.513	-0.6854	5.55712	6.70121	-7.5654
--					324.013	-0.06796	-0.15425	-0.51055	-0.42651	324.013	-0.6711	5.5873	6.71833	-7.55945
--					324.513	-0.07204	-0.15398	-0.50984	-0.42811	324.513	-0.65664	5.6189	6.73633	-7.55356
--					325.013	-0.07555	-0.15367	-0.50916	-0.42959	325.013	-0.64204	5.65249	6.75362	-7.54739
--					325.513	-0.07863	-0.1534	-0.50846	-0.43071	325.513	-0.62566	5.68113	6.77131	-7.54204
--					326.013	-0.08076	-0.15312	-0.50777	-0.43174	326.013	-0.60899	5.71185	6.7892	-7.53634
--					326.513	-0.08187	-0.15283	-0.50704	-0.43268	326.513	-0.59159	5.74516	6.8087	-7.53026
--					327.013	-0.0819	-0.15259	-0.5063	-0.43334	327.013	-0.57434	5.77539	6.82938	-7.52506
--					327.513	-0.08094	-0.15238	-0.50565	-0.43395	327.513	-0.55722	5.8088	6.84851	-7.51931
--					328.013	-0.07883	-0.15223	-0.505	-0.4344	328.013	-0.53812	5.83985	6.86875	-7.51404
--					328.513	-0.07589	-0.15213	-0.50441	-0.43476	328.513	-0.51977	5.87033	6.88839	-7.50899
--					329.013	-0.07181	-0.1521	-0.50384	-0.43508	329.013	-0.49963	5.90087	6.90888	-7.50363
--					329.513	-0.06728	-0.15214	-0.50334	-0.43535	329.513	-0.48047	5.93167	6.92844	-7.49847
--					330.013	-0.06256	-0.15224	-0.50288	-0.43559	330.013	-0.4622	5.9619	6.94842	-7.49364
--					330.513	-0.05728	-0.15242	-0.50242	-0.43584	330.513	-0.44274	5.99216	6.97039	-7.48914
--					331.013	-0.05272	-0.15268	-0.50207	-0.43612	331.013	-0.42606	6.02314	6.98979	-7.48487
--					331.513	-0.04767	-0.15301	-0.50174	-0.43649	331.513	-0.40703	6.05471	7.01059	-7.48069
--					332.013	-0.04334	-0.15342	-0.5015	-0.43695	332.013	-0.38946	6.08611	7.02966	-7.47687
--					332.513	-0.03943	-0.15388	-0.50128	-0.43756	332.513	-0.3715	6.11682	7.05259	-7.4732
--					333.013	-0.03641	-0.15438	-0.50116	-0.43831	333.013	-0.3548	6.14644	7.07161	-7.46993
--					333.513	-0.03422	-0.15494	-0.5011	-0.43919	333.513	-0.33914	6.17677	7.09199	-7.46706
--					334.013	-0.03259	-0.15555	-0.50111	-0.44031	334.013	-0.32141	6.20787	7.11282	-7.46432
--					334.513	-0.03191	-0.15618	-0.5012	-0.44157	334.513	-0.3057	6.23865	7.13353	-7.46192
--					335.013	-0.03194	-0.15682	-0.50139	-0.44317	335.013	-0.29002	6.26894	7.1551	-7.45959
--					335.513	-0.03262	-0.15744	-0.50168	-0.445	335.513	-0.27399	6.29846	7.17684	-7.45751
--					336.013	-0.03376	-0.15808	-0.50208	-0.44697	336.013	-0.25915	6.32902	7.19886	-7.45569
--					336.513	-0.03545	-0.15871	-0.50257	-0.44936	336.513	-0.24286	6.3603	7.21978	-7.4539
--					337.013	-0.03744	-0.15928	-0.5032	-0.45201	337.013	-0.22693	6.39062	7.24118	-7.45225
--					337.513	-0.03957	-0.1598	-0.50399	-0.45492	337.513	-0.21149	6.41997	7.26336	-7.45069
--					338.013	-0.04173	-0.16027	-0.50492	-0.45787	338.013	-0.19679	6.44928	7.28516	-7.44928
--					338.513	-0.04413	-0.16068	-0.50593	-0.46119	338.513	-0.18081	6.47954	7.3054	-7.44784
--					339.013	-0.04643	-0.16103	-0.50718	-0.46485	339.013	-0.16557	6.50992	7.3267	-7.44633
--					339.513	-0.04884	-0.1613	-0.50848	-0.46859	339.513	-0.14944	6.54164	7.34582	-7.44482
--					340.013	-0.05119	-0.16147	-0.50999	-0.47248	340.013	-0.13316	6.57099	7.36527	-7.44327
--					340.513	-0.05341	-0.16155	-0.51171	-0.47669	340.513	-0.11689	6.60188	7.38448	-7.44154
--					341.013	-0.0553	-0.16153	-0.51366	-0.48088	341.013	-0.10182	6.63121	7.40353	-7.43977
--					341.513	-0.05705	-0.1614	-0.51563	-0.48532	341.513	-0.08627	6.66327	7.42035	-7.43779
--					342.013	-0.05858	-0.16119	-0.51775	-0.49003	342.013	-0.07017	6.69216	7.43635	-7.43557
--					342.513	-0.05976	-0.16087	-0.52015	-0.49456	342.513	-0.05451	6.72311	7.45246	-7.4333
--					343.013	-0.06062	-0.16046	-0.52261	-0.49905	343.013	-0.03808	6.7526	7.46709	-7.43089
--					343.513	-0.06111	-0.15995	-0.52545	-0.50369	343.513	-0.0214	6.78259	7.48211	-7.42823
--					344.013	-0.06122	-0.15935	-0.52834	-0.5083	344.013	-0.00631	6.81289	7.49581	-7.42539
--					344.513	-0.061	-0.15865	-0.53156	-0.51299	344.513	0.01064	6.84399	7.50957	-7.42229
--					345.013	-0.0605	-0.1579	-0.53457	-0.51762	345.013	0.02751	6.87387	7.52133	-7.419
--					345.513	-0.05972	-0.15711	-0.53774	-0.52197	345.513	0.04554	6.90292	7.53281	-7.41568
--					346.013	-0.05885	-0.15623	-0.54137	-0.52622	346.013	0.06272	6.93338	7.54509	-7.4122
--					346.513	-0.05788	-0.15534	-0.5446	-0.53059	346.513	0.08081	6.96278	7.55549	-7.40837
--					347.013	-0.05699	-0.15433	-0.5483	-0.53481	347.013	0.0978	6.99493	7.56697	-7.40439
--					347.513	-0.05613	-0.15341	-0.55197	-0.53851	347.513	0.11644	7.02367	7.5781	-7.40064
--					348.013	-0.05543	-0.15245	-0.55578	-0.54241	348.013	0.13539	7.05378	7.58955	-7.3964
--					348.513	-0.05497	-0.15143	-0.55974	-0.54617	348.513	0.15344	7.08632	7.60148	-7.39199
--					349.013	-0.05473	-0.15053	-0.56365	-0.54967	349.013	0.17351	7.11594	7.61341	-7.38757
--					349.513	-0.05481	-0.14962	-0.56766	-0.55287	349.513	0.19239	7.14744	7.62587	-7.38321
--					350.013	-0.0552	-0.14881	-0.5713	-0.55573	350.013	0.21182	7.17744	7.63746	-7.37903
--					350.513	-0.0559	-0.14806	-0.57525	-0.55873	350.513	0.23099	7.208	7.65036	-7.37426
--					351.013	-0.05695	-0.14736	-0.57955	-0.56141	351.013	0.25074	7.24061	7.6648	-7.36963
--					351.513	-0.05831	-0.14682	-0.58356	-0.56391	351.513	0.27049	7.27051	7.67873	-7.36495
--					352.013	-0.05984	-0.14637	-0.58758	-0.56613	352.013	0.28896	7.30224	7.69302	-7.3604
--					352.513	-0.0615	-0.14605	-0.59144	-0.56838	352.513	0.30641	7.33513	7.70713	-7.35534
--					353.013	-0.06333	-0.14587	-0.59556	-0.57023	353.013	0.32409	7.36831	7.72257	-7.35075
--					353.513	-0.06538	-0.14585	-0.59971	-0.57201	353.513	0.34266	7.39729	7.73842	-7.34583
--					354.013	-0.06731	-0.14598	-0.60356	-0.57353	354.013	0.35966	7.43051	7.75337	-7.34116
--					354.513	-0.06928	-0.14626	-0.60744	-0.57493	354.513	0.37707	7.46121	7.76869	-7.33634
--					355.013	-0.07109	-0.1467	-0.61148	-0.57622	355.013	0.39367	7.49314	7.78484	-7.3313
--					355.513	-0.07267	-0.14731	-0.61524	-0.57731	355.513	0.40923	7.52638	7.8	-7.32644
--					356.013	-0.07425	-0.148	-0.61895	-0.5783	356.013	0.42667	7.55607	7.81505	-7.32134
--					356.513	-0.07558	-0.1489	-0.62246	-0.57906	356.513	0.4442	7.58883	7.82937	-7.31674
--					357.013	-0.07649	-0.14986	-0.6263	-0.57976	357.013	0.45972	7.61929	7.84502	-7.31178
--					357.513	-0.07719	-0.15103	-0.62977	-0.58034	357.513	0.47649	7.6527	7.85919	-7.3068
--					358.013	-0.07756	-0.15222	-0.6332	-0.5808	358.013	0.49372	7.68353	7.87314	-7.30203
--					358.513	-0.07759	-0.15356	-0.63649	-0.58117	358.513	0.51097	7.716	7.88643	-7.29729
--					359.013	-0.07732	-0.15495	-0.63986	-0.58149	359.013	0.52659	7.74756	7.89993	-7.29225
--					359.513	-0.07676	-0.15646	-0.64276	-0.58172	359.513	0.54314	7.78042	7.91144	-7.28755
--					360.013	-0.0759	-0.15802	-0.64597	-0.5819	360.013	0.5603	7.81312	7.92405	-7.28294
--					360.513	-0.07475	-0.15956	-0.64859	-0.58205	360.513	0.57849	7.84469	7.93417	-7.27849
--					361.013	-0.07351	-0.16103	-0.65147	-0.58219	361.013	0.59511	7.87431	7.94518	-7.27384
--					361.513	-0.07207	-0.16272	-0.65394	-0.5823	361.513	0.61289	7.90813	7.95451	-7.26994
--					362.013	-0.07068	-0.16429	-0.65671	-0.58243	362.013	0.62971	7.93962	7.96488	-7.26609
--					362.513	-0.06927	-0.16579	-0.65914	-0.5826	362.513	0.64743	7.96975	7.97392	-7.26193
--					363.013	-0.06815	-0.1674	-0.66146	-0.58282	363.013	0.66348	8.00245	7.98257	-7.25808
--					363.513	-0.0673	-0.16895	-0.6636	-0.58308	363.513	0.67966	8.03454	7.9907	-7.25467
--					364.013	-0.06683	-0.17045	-0.666	-0.58342	364.013	0.6969	8.06613	8.00006	-7.25141
--					364.513	-0.06695	-0.17198	-0.66805	-0.58384	364.513	0.71115	8.09916	8.0084	-7.24849
--					365.013	-0.0677	-0.17341	-0.67019	-0.58439	365.013	0.72652	8.13068	8.01766	-7.24571
--					365.513	-0.06923	-0.17476	-0.67196	-0.58503	365.513	0.7416	8.16132	8.02593	-7.24338
--					366.013	-0.07141	-0.17615	-0.67403	-0.58579	366.013	0.7554	8.19354	8.03643	-7.24134
--					366.513	-0.07422	-0.17733	-0.67577	-0.58664	366.513	0.76859	8.22146	8.04619	-7.23967
--					367.013	-0.07776	-0.17862	-0.67755	-0.58769	367.013	0.78196	8.25237	8.05716	-7.23818
--					367.513	-0.08172	-0.17994	-0.6793	-0.58881	367.513	0.7949	8.28494	8.06908	-7.23707
--					368.013	-0.08607	-0.18124	-0.68092	-0.5902	368.013	0.80792	8.3171	8.08133	-7.23614
--					368.513	-0.09067	-0.18245	-0.68249	-0.59164	368.513	0.82129	8.34747	8.09439	-7.23553
--					369.013	-0.09527	-0.18367	-0.68406	-0.59326	369.013	0.83499	8.37803	8.10866	-7.23514
--					369.513	-0.09983	-0.18493	-0.68561	-0.59513	369.513	0.84974	8.40937	8.12405	-7.23496
--					370.013	-0.10389	-0.18614	-0.68718	-0.59711	370.013	0.86476	8.43937	8.14097	-7.23496
--					370.513	-0.10758	-0.18741	-0.68868	-0.59921	370.513	0.88139	8.47052	8.15828	-7.2351
--					371.013	-0.11049	-0.18869	-0.6903	-0.60141	371.013	0.89838	8.50127	8.1784	-7.23533
--					371.513	-0.1125	-0.18986	-0.69183	-0.6038	371.513	0.91453	8.52884	8.1984	-7.23562
--					372.013	-0.11404	-0.19126	-0.69333	-0.6063	372.013	0.9327	8.56093	8.21913	-7.23592
--					372.513	-0.11503	-0.19263	-0.69491	-0.60915	372.513	0.95298	8.59175	8.24187	-7.23622
--					373.013	-0.11547	-0.1939	-0.6964	-0.61196	373.013	0.97229	8.61958	8.26394	-7.23642
--					373.513	-0.11559	-0.19508	-0.69795	-0.61501	373.513	0.994	8.6449	8.28748	-7.23649
--					374.013	-0.11553	-0.19668	-0.69948	-0.61804	374.013	1.01615	8.67842	8.31094	-7.2364
--					374.513	-0.11549	-0.19824	-0.70118	-0.62126	374.513	1.0371	8.71025	8.33698	-7.23609
--					375.013	-0.11567	-0.19968	-0.7028	-0.62459	375.013	1.06288	8.73894	8.36165	-7.23553
--					375.513	-0.11616	-0.20117	-0.70449	-0.62795	375.513	1.08435	8.76807	8.38692	-7.2347
--					376.013	-0.11706	-0.2027	-0.70624	-0.63103	376.013	1.10581	8.79748	8.41216	-7.2337
--					376.513	-0.11848	-0.20425	-0.70809	-0.63458	376.513	1.12786	8.82661	8.43784	-7.23227
--					377.013	-0.12018	-0.2059	-0.70989	-0.6381	377.013	1.14738	8.85727	8.46157	-7.23057
--					377.513	-0.12271	-0.20748	-0.71183	-0.64184	377.513	1.17028	8.88612	8.48582	-7.22844
--					378.013	-0.12555	-0.20898	-0.71404	-0.64538	378.013	1.19162	8.91331	8.51139	-7.22615
--					378.513	-0.12862	-0.21072	-0.71623	-0.64908	378.513	1.21216	8.94433	8.53489	-7.22348
--					379.013	-0.1317	-0.21235	-0.71856	-0.65301	379.013	1.23157	8.97321	8.55783	-7.22037
--					379.513	-0.13434	-0.21407	-0.7211	-0.65704	379.513	1.24817	9.00319	8.58076	-7.21695
--					380.013	-0.13725	-0.21574	-0.72396	-0.66099	380.013	1.26735	9.03203	8.60419	-7.21337
--					380.513	-0.13941	-0.21745	-0.72687	-0.665	380.513	1.28333	9.06101	8.62573	-7.20957
--					381.013	-0.1413	-0.21916	-0.72985	-0.66905	381.013	1.30035	9.0897	8.64575	-7.2056
--					381.513	-0.14271	-0.22102	-0.73306	-0.67312	381.513	1.31817	9.12048	8.66535	-7.20153
--					382.013	-0.14345	-0.22271	-0.73637	-0.67727	382.013	1.3358	9.14797	8.68375	-7.19734
--					382.513	-0.14354	-0.22467	-0.74042	-0.68159	382.513	1.35279	9.17919	8.70422	-7.19297
--					383.013	-0.14308	-0.22649	-0.7442	-0.68643	383.013	1.36928	9.20773	8.7217	-7.18812
--					383.513	-0.14204	-0.22849	-0.74831	-0.69079	383.513	1.38766	9.23827	8.73923	-7.18385
--					384.013	-0.14066	-0.23047	-0.7528	-0.69521	384.013	1.40496	9.26789	8.75694	-7.17962
--					384.513	-0.13909	-0.23252	-0.75761	-0.69981	384.513	1.42168	9.2978	8.77469	-7.17537
--					385.013	-0.1371	-0.23459	-0.76218	-0.70471	385.013	1.44109	9.32726	8.7906	-7.17103
--					385.513	-0.13523	-0.23673	-0.76736	-0.70933	385.513	1.45898	9.35688	8.80782	-7.16713
--					386.013	-0.13324	-0.23881	-0.77238	-0.71425	386.013	1.47852	9.38515	8.82388	-7.16318
--					386.513	-0.13137	-0.24114	-0.77768	-0.71904	386.513	1.49852	9.416	8.84045	-7.15956
--					387.013	-0.12972	-0.24344	-0.783	-0.72454	387.013	1.5185	9.44592	8.85681	-7.15565
--					387.513	-0.12837	-0.24565	-0.78862	-0.73005	387.513	1.53827	9.47407	8.874	-7.15201
--					388.013	-0.12732	-0.24819	-0.79431	-0.73526	388.013	1.55881	9.50584	8.89147	-7.14879
--					388.513	-0.12668	-0.25041	-0.79973	-0.74066	388.513	1.57901	9.5333	8.90827	-7.14569
--					389.013	-0.1265	-0.25286	-0.8056	-0.74603	389.013	1.59849	9.56333	8.92681	-7.14281
--					389.513	-0.12684	-0.25529	-0.81148	-0.75156	389.513	1.61916	9.59282	8.94587	-7.14004
--					390.013	-0.1277	-0.25783	-0.81716	-0.75737	390.013	1.63797	9.62341	8.96481	-7.13731
--					390.513	-0.1292	-0.26035	-0.82318	-0.76331	390.513	1.65714	9.65388	8.98554	-7.13469
--					391.013	-0.13155	-0.26265	-0.82846	-0.76926	391.013	1.67739	9.68174	9.00432	-7.13222
--					391.513	-0.13429	-0.26504	-0.83428	-0.77489	391.513	1.69498	9.71089	9.02573	-7.12998
--					392.013	-0.138	-0.26751	-0.8402	-0.78047	392.013	1.71387	9.7412	9.0483	-7.12785
--					392.513	-0.1423	-0.27	-0.84541	-0.78696	392.513	1.73203	9.77237	9.06877	-7.12545
--					393.013	-0.14772	-0.27224	-0.85113	-0.79309	393.013	1.75168	9.80079	9.0919	-7.12323
--					393.513	-0.15386	-0.27456	-0.85653	-0.79898	393.513	1.77148	9.83068	9.11425	-7.12112
--					394.013	-0.16015	-0.27677	-0.8617	-0.80525	394.013	1.79029	9.85997	9.13602	-7.11889
--					394.513	-0.1669	-0.279	-0.86689	-0.8114	394.513	1.80966	9.89008	9.15814	-7.11671
--					395.013	-0.17437	-0.28133	-0.87215	-0.8175	395.013	1.8309	9.92246	9.18062	-7.11453
--					395.513	-0.18209	-0.28333	-0.87744	-0.82424	395.513	1.85337	9.95122	9.20319	-7.11212
--					396.013	-0.18904	-0.28544	-0.88261	-0.83088	396.013	1.87479	9.98234	9.22503	-7.10972
--					396.513	-0.19504	-0.28728	-0.88801	-0.83772	396.513	1.89491	10.0102	9.24735	-7.10723
--					397.013	-0.20139	-0.28937	-0.89358	-0.84471	397.013	1.9189	10.0431	9.26967	-7.10468
--					397.513	-0.20648	-0.29112	-0.89869	-0.8518	397.513	1.94146	10.0713	9.2894	-7.10209
--					398.013	-0.21071	-0.2929	-0.90421	-0.85875	398.013	1.9643	10.1011	9.30971	-7.09958
--					398.513	-0.21394	-0.29465	-0.90985	-0.86654	398.513	1.98659	10.1312	9.32933	-7.09679
--					399.013	-0.21633	-0.29638	-0.9156	-0.87361	399.013	2.00907	10.1617	9.34802	-7.09431
--					399.513	-0.21796	-0.29804	-0.92135	-0.88136	399.513	2.03238	10.1918	9.36541	-7.09167
--					400.013	-0.21881	-0.29955	-0.92754	-0.88906	400.013	2.05519	10.22	9.38264	-7.08914
--					400.513	-0.21906	-0.30107	-0.93403	-0.89694	400.513	2.07655	10.2486	9.39909	-7.08667
--					401.013	-0.21892	-0.3026	-0.94035	-0.90533	401.013	2.09774	10.2783	9.41357	-7.08418
--					401.513	-0.21852	-0.30418	-0.9471	-0.9139	401.513	2.11908	10.309	9.42752	-7.08183
--					402.013	-0.21806	-0.30559	-0.95419	-0.92279	402.013	2.1393	10.3369	9.4406	-7.07959
--					402.513	-0.21766	-0.30699	-0.96151	-0.93179	402.513	2.15928	10.3645	9.45255	-7.07755
--					403.013	-0.21744	-0.30849	-0.9688	-0.94083	403.013	2.17946	10.3941	9.46304	-7.07576
--					403.513	-0.21751	-0.31005	-0.97679	-0.95006	403.513	2.19935	10.4245	9.4731	-7.07419
--					404.013	-0.21796	-0.3116	-0.98508	-0.95971	404.013	2.21973	10.4544	9.48217	-7.07284
--					404.513	-0.21892	-0.31306	-0.99355	-0.97015	404.513	2.2418	10.4817	9.49015	-7.07174
--					405.013	-0.22004	-0.31456	-1.00225	-0.98063	405.013	2.25956	10.5092	9.49718	-7.07099
--					405.513	-0.22184	-0.31621	-1.01249	-0.99083	405.513	2.28153	10.5383	9.50416	-7.07063
--					406.013	-0.22375	-0.31783	-1.022	-1.00189	406.013	2.30114	10.5657	9.50959	-7.07062
--					406.513	-0.22604	-0.31957	-1.03192	-1.01287	406.513	2.32205	10.5938	9.51434	-7.07102
--					407.013	-0.22859	-0.32144	-1.04228	-1.02389	407.013	2.34384	10.6224	9.5185	-7.07181
--					407.513	-0.23118	-0.32329	-1.05337	-1.03588	407.513	2.36541	10.6492	9.52218	-7.0731
--					408.013	-0.23388	-0.32525	-1.065	-1.04892	408.013	2.38808	10.676	9.52538	-7.07498
--					408.513	-0.23653	-0.32747	-1.07748	-1.06091	408.513	2.41122	10.7045	9.52822	-7.07713
--					409.013	-0.23913	-0.3296	-1.09022	-1.07223	409.013	2.43547	10.7303	9.53065	-7.07949
--					409.513	-0.24157	-0.33192	-1.1033	-1.0858	409.513	2.46042	10.7567	9.53283	-7.08272
--					410.013	-0.24381	-0.33437	-1.11667	-1.09792	410.013	2.48619	10.7829	9.53484	-7.08592
--					410.513	-0.24575	-0.33715	-1.13023	-1.1111	410.513	2.51117	10.8108	9.53682	-7.08968
--					411.013	-0.24753	-0.33989	-1.14525	-1.12428	411.013	2.53697	10.8368	9.53909	-7.09369
--					411.513	-0.24912	-0.3428	-1.16136	-1.13894	411.513	2.56229	10.8628	9.54179	-7.09835
--					412.013	-0.25067	-0.34592	-1.17579	-1.1525	412.013	2.58802	10.8892	9.54455	-7.10279
--					412.513	-0.25224	-0.34903	-1.19273	-1.16745	412.513	2.61378	10.9143	9.54839	-7.10774
--					413.013	-0.25397	-0.35239	-1.20989	-1.18191	413.013	2.63945	10.9401	9.55305	-7.11249
--					413.513	-0.25603	-0.3559	-1.22726	-1.19799	413.513	2.66566	10.9658	9.55866	-7.11765
--					414.013	-0.25851	-0.35973	-1.24586	-1.21416	414.013	2.69142	10.9926	9.56582	-7.1226
--					414.513	-0.2615	-0.36342	-1.26572	-1.22968	414.513	2.71639	11.0176	9.57489	-7.12706
--					415.013	-0.2652	-0.36735	-1.28337	-1.24554	415.013	2.74137	11.0431	9.58422	-7.13124
--					415.513	-0.26981	-0.37161	-1.30292	-1.26209	415.513	2.76674	11.0699	9.59601	-7.13515
--					416.013	-0.27519	-0.37576	-1.32348	-1.27952	416.013	2.7914	11.0951	9.6101	-7.1387
--					416.513	-0.28194	-0.38041	-1.34256	-1.29811	416.513	2.81762	11.1225	9.62469	-7.14182
--					417.013	-0.28945	-0.38488	-1.36364	-1.31559	417.013	2.84296	11.1482	9.64251	-7.1441
--					417.513	-0.29838	-0.3894	-1.38377	-1.33435	417.513	2.86969	11.1735	9.66111	-7.14583
--					418.013	-0.30764	-0.39393	-1.40659	-1.35433	418.013	2.89484	11.1984	9.684	-7.14689
--					418.513	-0.31827	-0.39876	-1.42748	-1.37483	418.513	2.92161	11.2243	9.70651	-7.14715
--					419.013	-0.32925	-0.40366	-1.44956	-1.39555	419.013	2.94764	11.2502	9.73177	-7.14665
--					419.513	-0.33997	-0.40864	-1.47231	-1.41631	419.513	2.97198	11.2759	9.7592	-7.14542
--					420.013	-0.3523	-0.41343	-1.49484	-1.43936	420.013	2.9991	11.3003	9.7876	-7.1433
--					420.513	-0.36365	-0.4183	-1.51831	-1.46141	420.513	3.02352	11.3247	9.81826	-7.14064
--					421.013	-0.37569	-0.4237	-1.54043	-1.48513	421.013	3.04906	11.3513	9.8479	-7.13718
--					421.513	-0.38738	-0.42887	-1.56417	-1.51132	421.513	3.07369	11.3764	9.88032	-7.13281
--					422.013	-0.39931	-0.43438	-1.58827	-1.53654	422.013	3.09879	11.4028	9.91359	-7.12817
--					422.513	-0.41085	-0.43996	-1.61234	-1.56195	422.513	3.1232	11.4291	9.94687	-7.1232
--					423.013	-0.42145	-0.44573	-1.6369	-1.58861	423.013	3.14587	11.4558	9.98063	-7.11781
--					423.513	-0.43237	-0.45129	-1.66046	-1.6155	423.513	3.16962	11.4813	10.0125	-7.11231
--					424.013	-0.44198	-0.45709	-1.68616	-1.64314	424.013	3.191	11.5075	10.0466	-7.1067
--					424.513	-0.45221	-0.46299	-1.71112	-1.67372	424.513	3.21444	11.5338	10.0786	-7.10068
--					425.013	-0.46117	-0.46917	-1.73617	-1.70295	425.013	3.23582	11.561	10.1095	-7.09522
--					425.513	-0.47061	-0.47539	-1.76183	-1.73545	425.513	3.25945	11.588	10.1396	-7.0896
--					426.013	-0.47911	-0.48148	-1.78844	-1.7674	426.013	3.28202	11.6142	10.1691	-7.0846
--					426.513	-0.48719	-0.48791	-1.81458	-1.7995	426.513	3.30501	11.6415	10.1962	-7.0802
--					427.013	-0.49496	-0.49421	-1.84171	-1.83334	427.013	3.32897	11.6679	10.2222	-7.0763
--					427.513	-0.50151	-0.50124	-1.86933	-1.86703	427.513	3.35104	11.6971	10.2464	-7.0732
--					428.013	-0.50794	-0.50766	-1.89622	-1.90201	428.013	3.37486	11.7235	10.2679	-7.07085
--					428.513	-0.51389	-0.51525	-1.92531	-1.93962	428.513	3.39939	11.7544	10.2888	-7.06931
--					429.013	-0.51928	-0.52223	-1.95533	-1.97705	429.013	3.4242	11.7826	10.3079	-7.06882
--					429.513	-0.52439	-0.53026	-1.98379	-2.0139	429.513	3.45051	11.8147	10.324	-7.0693
--					430.013	-0.52893	-0.53802	-2.01424	-2.05275	430.013	3.4764	11.8455	10.339	-7.07084
--					430.513	-0.53327	-0.54615	-2.04551	-2.08962	430.513	3.50324	11.8773	10.3525	-7.07321
--					431.013	-0.53752	-0.55451	-2.07651	-2.12728	431.013	3.53083	11.9098	10.3642	-7.07651
--					431.513	-0.54158	-0.56265	-2.10902	-2.16704	431.513	3.55743	11.9411	10.3749	-7.08088
--					432.013	-0.54615	-0.57138	-2.14447	-2.20827	432.013	3.58634	11.9743	10.3852	-7.0863
--					432.513	-0.55109	-0.58061	-2.17762	-2.25045	432.513	3.61535	12.009	10.3939	-7.09265
--					433.013	-0.55694	-0.59011	-2.21183	-2.29321	433.013	3.64633	12.0442	10.4023	-7.09981
--					433.513	-0.56287	-0.60036	-2.24586	-2.33465	433.513	3.67436	12.0817	10.4104	-7.10733
--					434.013	-0.5702	-0.61031	-2.28105	-2.37313	434.013	3.70524	12.1175	10.4188	-7.11471
--					434.513	-0.57907	-0.62045	-2.31401	-2.41759	434.513	3.73852	12.1534	10.427	-7.12358
--					435.013	-0.58865	-0.63254	-2.35143	-2.45947	435.013	3.77096	12.1955	10.4371	-7.13215
--					435.513	-0.59899	-0.64363	-2.38584	-2.50161	435.513	3.80307	12.2333	10.4472	-7.14084
--					436.013	-0.61085	-0.65634	-2.4236	-2.5407	436.013	3.8374	12.2758	10.4593	-7.14884
--					436.513	-0.62362	-0.66936	-2.46055	-2.58504	436.513	3.87239	12.3184	10.4725	-7.15773
--					437.013	-0.63766	-0.6815	-2.49752	-2.62933	437.013	3.90938	12.3573	10.4871	-7.16627
--					437.513	-0.65253	-0.69581	-2.53674	-2.67114	437.513	3.94759	12.4022	10.5042	-7.17389
--					438.013	-0.66719	-0.71171	-2.57399	-2.71369	438.013	3.98486	12.451	10.5219	-7.18108
--					438.513	-0.68228	-0.72658	-2.61084	-2.75713	438.513	4.02332	12.4956	10.5408	-7.18775
--					439.013	-0.69616	-0.74284	-2.65032	-2.79803	439.013	4.05909	12.5433	10.5626	-7.19333
--					439.513	-0.71015	-0.75992	-2.68878	-2.83869	439.513	4.09579	12.5924	10.5853	-7.19811
--					440.013	-0.72623	-0.77906	-2.73019	-2.88214	440.013	4.13915	12.6461	10.6112	-7.20228
--					440.513	-0.74069	-0.79721	-2.76824	-2.92208	440.513	4.17944	12.696	10.6361	-7.20527
--					441.013	-0.75487	-0.81796	-2.80608	-2.96443	441.013	4.2204	12.7519	10.6619	-7.20748
--					441.513	-0.76829	-0.83851	-2.84627	-3.00695	441.513	4.26064	12.8061	10.6901	-7.20869
--					442.013	-0.78091	-0.85945	-2.88519	-3.04847	442.013	4.29987	12.8603	10.7182	-7.2089
--					442.513	-0.795	-0.88234	-2.92262	-3.09086	442.513	4.34542	12.9186	10.7457	-7.20812
--					443.013	-0.80711	-0.90674	-2.96171	-3.13505	443.013	4.386	12.9795	10.7749	-7.20628
--					443.513	-0.81899	-0.93065	-2.99799	-3.17577	443.513	4.4271	13.0383	10.8022	-7.20368
--					444.013	-0.83133	-0.95466	-3.03334	-3.21973	444.013	4.47105	13.0963	10.829	-7.19996
--					444.513	-0.84229	-0.98054	-3.07199	-3.26063	444.513	4.51114	13.158	10.8583	-7.19572
--					445.013	-0.85281	-1.00847	-3.10901	-3.30088	445.013	4.55038	13.2237	10.8864	-7.19086
--					445.513	-0.86213	-1.03343	-3.14527	-3.34398	445.513	4.58586	13.2816	10.9139	-7.18501
--					446.013	-0.87238	-1.06178	-3.17916	-3.38456	446.013	4.62561	13.3466	10.9397	-7.17897
--					446.513	-0.88168	-1.08997	-3.21273	-3.42784	446.513	4.66254	13.4105	10.9652	-7.17204
--					447.013	-0.89028	-1.11862	-3.24676	-3.46969	447.013	4.69766	13.4747	10.9913	-7.16497
--					447.513	-0.89824	-1.14654	-3.28097	-3.51022	447.513	4.73137	13.5367	11.0176	-7.15787
--					448.013	-0.90581	-1.17548	-3.31277	-3.55067	448.013	4.76516	13.6004	11.0425	-7.15063
--					448.513	-0.91242	-1.20392	-3.34443	-3.59484	448.513	4.79687	13.6625	11.0677	-7.14263
--					449.013	-0.91799	-1.23287	-3.37542	-3.63748	449.013	4.82647	13.7253	11.0929	-7.13493
--					449.513	-0.9224	-1.26078	-3.40405	-3.6788	449.513	4.85331	13.7855	11.1168	-7.12756
--					450.013	-0.92563	-1.28989	-3.43471	-3.72492	450.013	4.87684	13.8479	11.1433	-7.11955
--					450.513	-0.92837	-1.32015	-3.46627	-3.76638	450.513	4.90312	13.9125	11.1715	-7.11261
--					451.013	-0.92982	-1.34994	-3.49383	-3.80918	451.013	4.92456	13.9759	11.1971	-7.10578
--					451.513	-0.93045	-1.37774	-3.52398	-3.85171	451.513	4.94492	14.035	11.2264	-7.09938
--					452.013	-0.93034	-1.40686	-3.55102	-3.89517	452.013	4.9636	14.0968	11.2537	-7.09329
--					452.513	-0.92964	-1.43234	-3.58041	-3.93679	452.513	4.9806	14.151	11.2847	-7.08791
--					453.013	-0.92843	-1.46027	-3.60644	-3.98237	453.013	4.99736	14.2106	11.3133	-7.08258
--					453.513	-0.92691	-1.48595	-3.6351	-4.02631	453.513	5.01242	14.2657	11.3461	-7.078
--					454.013	-0.9252	-1.51152	-3.66115	-4.07207	454.013	5.02636	14.3209	11.377	-7.07382
--					454.513	-0.92336	-1.53731	-3.68677	-4.11457	454.513	5.03946	14.3772	11.4085	-7.07048
--					455.013	-0.92132	-1.55979	-3.71318	-4.16022	455.013	5.05245	14.4269	11.442	-7.06745
--					455.513	-0.91926	-1.58352	-3.74144	-4.20304	455.513	5.06435	14.4802	11.479	-7.06511
--					456.013	-0.91697	-1.60389	-3.76628	-4.24842	456.013	5.07616	14.527	11.5124	-7.06313
--					456.513	-0.91456	-1.62388	-3.79095	-4.29475	456.513	5.08702	14.5741	11.5463	-7.06159
--					457.013	-0.9118	-1.643	-3.81673	-4.3362	457.013	5.09768	14.6205	11.5825	-7.06058
--					457.513	-0.90846	-1.66105	-3.84224	-4.38402	457.513	5.10847	14.6661	11.6189	-7.05978
--					458.013	-0.90465	-1.67708	-3.86641	-4.42625	458.013	5.11871	14.7085	11.654	-7.05934
--					458.513	-0.90018	-1.69092	-3.89154	-4.47168	458.513	5.12875	14.747	11.6909	-7.05907
--					459.013	-0.89515	-1.70486	-3.91507	-4.51849	459.013	5.13834	14.7884	11.7258	-7.05894
--					459.513	-0.88922	-1.71666	-3.93686	-4.56248	459.513	5.14809	14.8263	11.7584	-7.05887
--					460.013	-0.88261	-1.72724	-3.96109	-4.60602	460.013	5.15764	14.8638	11.795	-7.05877
--					460.513	-0.87559	-1.73609	-3.98249	-4.65059	460.513	5.16672	14.8989	11.8275	-7.05855
--					461.013	-0.86758	-1.74377	-4.00366	-4.69589	461.013	5.17617	14.9343	11.8599	-7.05812
--					461.513	-0.85949	-1.74949	-4.02721	-4.73912	461.513	5.18503	14.966	11.8963	-7.05743
--					462.013	-0.85029	-1.75371	-4.04666	-4.78279	462.013	5.19449	14.9956	11.9268	-7.05637
--					462.513	-0.84238	-1.757	-4.06712	-4.82402	462.513	5.20225	15.028	11.9595	-7.05495
--					463.013	-0.83358	-1.75855	-4.08663	-4.86754	463.013	5.21059	15.0555	11.9915	-7.05292
--					463.513	-0.82569	-1.75888	-4.10324	-4.90609	463.513	5.21786	15.0845	12.0198	-7.05059
--					464.013	-0.81779	-1.7579	-4.12104	-4.94794	464.013	5.225	15.1112	12.0516	-7.04742
--					464.513	-0.80911	-1.75564	-4.13705	-4.98654	464.513	5.23269	15.1375	12.0821	-7.04383
--					465.013	-0.8013	-1.7521	-4.15444	-5.02664	465.013	5.23947	15.1633	12.1181	-7.03932
--					465.513	-0.79266	-1.74745	-4.16788	-5.06443	465.513	5.24687	15.1878	12.1489	-7.0343
--					466.013	-0.78437	-1.74148	-4.18136	-5.10011	466.013	5.25386	15.2122	12.1836	-7.02876
--					466.513	-0.77599	-1.7342	-4.19427	-5.13568	466.513	5.26085	15.2365	12.2218	-7.02243
--					467.013	-0.76778	-1.7261	-4.20491	-5.16933	467.013	5.26767	15.2592	12.2586	-7.0156
--					467.513	-0.75797	-1.71677	-4.21525	-5.20136	467.513	5.27578	15.2817	12.301	-7.00827
--					468.013	-0.74861	-1.70657	-4.22364	-5.23419	468.013	5.28354	15.3032	12.3425	-6.99983
--					468.513	-0.73849	-1.69555	-4.23185	-5.26521	468.513	5.29197	15.3238	12.3931	-6.99093
--					469.013	-0.72834	-1.68378	-4.23797	-5.29385	469.013	5.30047	15.3436	12.441	-6.9818
--					469.513	-0.71828	-1.67209	-4.24305	-5.32352	469.513	5.3089	15.3614	12.4928	-6.97135
--					470.013	-0.70718	-1.65964	-4.24714	-5.34921	470.013	5.31815	15.3788	12.551	-6.96136
--					470.513	-0.69796	-1.64603	-4.24979	-5.37536	470.513	5.32571	15.3961	12.6089	-6.95019
--					471.013	-0.6872	-1.63206	-4.25125	-5.39988	471.013	5.33426	15.4124	12.6707	-6.93866
--					471.513	-0.67677	-1.61714	-4.25145	-5.42194	471.513	5.34215	15.4283	12.7358	-6.92726
--					472.013	-0.66595	-1.603	-4.25043	-5.4424	472.013	5.34973	15.4421	12.8007	-6.91568
--					472.513	-0.65628	-1.58891	-4.24825	-5.46162	472.513	5.35585	15.4547	12.8664	-6.9037
--					473.013	-0.64645	-1.57395	-4.24452	-5.47919	473.013	5.36131	15.4669	12.9398	-6.89164
--					473.513	-0.63597	-1.55981	-4.23982	-5.49573	473.513	5.3661	15.4773	13.0088	-6.87903
--					474.013	-0.62655	-1.54516	-4.23411	-5.51034	474.013	5.36941	15.4871	13.0761	-6.8666
--					474.513	-0.61744	-1.52953	-4.22688	-5.52351	474.513	5.37162	15.4965	13.1473	-6.85396
--					475.013	-0.6091	-1.51326	-4.21879	-5.5356	475.013	5.37271	15.505	13.2153	-6.84072
--					475.513	-0.60148	-1.49778	-4.20944	-5.54539	475.513	5.37289	15.512	13.2837	-6.82833
--					476.013	-0.59415	-1.48197	-4.19957	-5.55398	476.013	5.37228	15.5179	13.3477	-6.81555
--					476.513	-0.58756	-1.46663	-4.18802	-5.5616	476.513	5.3711	15.5226	13.4144	-6.80176
--					477.013	-0.58149	-1.45033	-4.17456	-5.56796	477.013	5.36953	15.5264	13.4839	-6.78707
--					477.513	-0.57582	-1.43434	-4.16126	-5.57234	477.513	5.36778	15.529	13.5457	-6.77326
--					478.013	-0.57069	-1.41915	-4.14618	-5.57538	478.013	5.36613	15.5303	13.6094	-6.75875
--					478.513	-0.56584	-1.40326	-4.12912	-5.57698	478.513	5.36474	15.5306	13.6749	-6.74338
--					479.013	-0.56141	-1.38735	-4.11336	-5.57706	479.013	5.36381	15.5297	13.7303	-6.72818
--					479.513	-0.55691	-1.37211	-4.09506	-5.57569	479.513	5.36338	15.5278	13.7896	-6.71242
--					480.013	-0.55214	-1.35717	-4.07569	-5.57298	480.013	5.36356	15.5249	13.8474	-6.69679
--					480.513	-0.54683	-1.34256	-4.05597	-5.56855	480.513	5.36454	15.5212	13.9018	-6.67931
--					481.013	-0.54189	-1.32839	-4.0345	-5.56302	481.013	5.36611	15.5167	13.9568	-6.66245
--					481.513	-0.53627	-1.3145	-4.01169	-5.55616	481.513	5.36853	15.5115	14.0111	-6.64524
--					482.013	-0.5307	-1.30113	-3.98895	-5.54695	482.013	5.37149	15.5058	14.0615	-6.62543
--					482.513	-0.52503	-1.28794	-3.96398	-5.53705	482.513	5.37496	15.4996	14.1133	-6.60667
--					483.013	-0.51904	-1.27515	-3.93888	-5.52485	483.013	5.37903	15.493	14.1621	-6.58587
--					483.513	-0.51255	-1.26227	-3.91254	-5.51152	483.513	5.38385	15.486	14.2103	-6.5651
--					484.013	-0.50648	-1.2501	-3.884	-5.49529	484.013	5.3887	15.479	14.2595	-6.5418
--					484.513	-0.50055	-1.2385	-3.85497	-5.47836	484.513	5.39374	15.4721	14.307	-6.51917
--					485.013	-0.49376	-1.22677	-3.82509	-5.4596	485.013	5.39989	15.465	14.3535	-6.49564
--					485.513	-0.48728	-1.21501	-3.79557	-5.43953	485.513	5.40615	15.4579	14.3975	-6.47185
--					486.013	-0.48147	-1.2036	-3.76408	-5.41744	486.013	5.41214	15.451	14.4428	-6.447
--					486.513	-0.47555	-1.19241	-3.73056	-5.39353	486.513	5.41868	15.4444	14.4895	-6.42138
--					487.013	-0.46976	-1.18114	-3.69802	-5.36772	487.013	5.42563	15.4381	14.5338	-6.39499
--					487.513	-0.46388	-1.17045	-3.66387	-5.3418	487.513	5.43337	15.4324	14.5795	-6.36958
--					488.013	-0.45891	-1.1606	-3.62738	-5.31383	488.013	5.44067	15.4276	14.6279	-6.34321
--					488.513	-0.45398	-1.14959	-3.59297	-5.28506	488.513	5.4488	15.4228	14.6734	-6.31709
--					489.013	-0.44936	-1.14003	-3.55566	-5.25136	489.013	5.45763	15.4191	14.7228	-6.28762
--					489.513	-0.44562	-1.12983	-3.5199	-5.21774	489.513	5.46605	15.4159	14.7706	-6.25927
--					490.013	-0.44242	-1.11928	-3.48156	-5.18501	490.013	5.47468	15.4132	14.8224	-6.23258
--					490.513	-0.43991	-1.10956	-3.44334	-5.14905	490.513	5.48303	15.4116	14.8749	-6.20416
--					491.013	-0.43801	-1.10045	-3.40505	-5.11351	491.013	5.49098	15.4107	14.9283	-6.17693
--					491.513	-0.43645	-1.09004	-3.36651	-5.07464	491.513	5.49931	15.4105	14.9832	-6.14802
--					492.013	-0.43519	-1.08018	-3.327	-5.03623	492.013	5.50833	15.4113	15.0404	-6.12025
--					492.513	-0.43437	-1.0702	-3.28782	-4.99854	492.513	5.51591	15.4129	15.0982	-6.0937
--					493.013	-0.43363	-1.06082	-3.24763	-4.95374	493.013	5.52379	15.4152	15.1585	-6.06299
--					493.513	-0.43286	-1.05127	-3.20785	-4.91233	493.513	5.53161	15.4184	15.2192	-6.03532
--					494.013	-0.43195	-1.04164	-3.16673	-4.86962	494.013	5.5391	15.4224	15.2828	-6.00745
--					494.513	-0.43076	-1.03211	-3.12449	-4.82324	494.513	5.54632	15.4272	15.3488	-5.97787
--					495.013	-0.42914	-1.02298	-3.08394	-4.78019	495.013	5.5536	15.4326	15.4128	-5.95098
--					495.513	-0.42686	-1.01354	-3.04445	-4.73329	495.513	5.56136	15.4389	15.4755	-5.92227
--					496.013	-0.42451	-1.00394	-3.00441	-4.68847	496.013	5.56777	15.4461	15.5392	-5.89533
--					496.513	-0.4208	-0.99428	-2.96339	-4.64104	496.513	5.57617	15.4543	15.6046	-5.8673
--					497.013	-0.4167	-0.98497	-2.92406	-4.59174	497.013	5.58407	15.4628	15.6674	-5.83862
--					497.513	-0.41153	-0.97557	-2.88437	-4.54349	497.513	5.59288	15.4723	15.7306	-5.81095
--					498.013	-0.40517	-0.96634	-2.8439	-4.49461	498.013	5.6027	15.4823	15.7948	-5.78326
--					498.513	-0.39941	-0.95724	-2.8053	-4.44349	498.513	5.61098	15.493	15.8559	-5.75462
--					499.013	-0.39197	-0.94787	-2.76421	-4.39239	499.013	5.62121	15.5048	15.9208	-5.72627
--					499.513	-0.38513	-0.93919	-2.7248	-4.34494	499.513	5.6303	15.5165	15.983	-5.70015
--					500.013	-0.37817	-0.93036	-2.68436	-4.29399	500.013	5.63942	15.5292	16.0467	-5.67226
--					500.513	-0.37099	-0.922	-2.64661	-4.24141	500.513	5.64886	15.542	16.1064	-5.64362
--					501.013	-0.36321	-0.91291	-2.60955	-4.19044	501.013	5.65927	15.5568	16.1654	-5.61595
--					501.513	-0.35624	-0.9045	-2.57117	-4.13799	501.513	5.66897	15.5714	16.227	-5.58753
--					502.013	-0.3498	-0.89629	-2.53549	-4.0816	502.013	5.67847	15.5866	16.2851	-5.55699
--					502.513	-0.34391	-0.88853	-2.49943	-4.02697	502.513	5.68793	15.6019	16.3449	-5.52736
--					503.013	-0.33885	-0.88117	-2.46359	-3.97084	503.013	5.697	15.6173	16.4057	-5.49685
--					503.513	-0.33444	-0.87432	-2.42737	-3.92125	503.513	5.70609	15.6324	16.4688	-5.46979
--					504.013	-0.33074	-0.86682	-2.39246	-3.86859	504.013	5.71519	15.65	16.5316	-5.44093
--					504.513	-0.32781	-0.86027	-2.35822	-3.81286	504.513	5.72405	15.6663	16.5952	-5.4102
--					505.013	-0.32541	-0.85346	-2.32263	-3.76038	505.013	5.73321	15.6844	16.6639	-5.38106
--					505.513	-0.32357	-0.847	-2.29033	-3.70947	505.513	5.74223	15.7026	16.7286	-5.35258
--					506.013	-0.32208	-0.84095	-2.25937	-3.65576	506.013	5.75162	15.7207	16.7929	-5.32227
--					506.513	-0.32091	-0.83504	-2.22787	-3.60129	506.513	5.76075	15.7394	16.8605	-5.29125
--					507.013	-0.31979	-0.82977	-2.19632	-3.54753	507.013	5.77095	15.7571	16.9307	-5.2603
--					507.513	-0.3187	-0.82411	-2.16592	-3.4959	507.513	5.78177	15.7772	17.0005	-5.23026
--					508.013	-0.3177	-0.81914	-2.13548	-3.44326	508.013	5.79215	15.7957	17.0724	-5.19929
--					508.513	-0.3166	-0.81427	-2.10663	-3.3928	508.513	5.80366	15.8148	17.1422	-5.16924
--					509.013	-0.31534	-0.80937	-2.07877	-3.34317	509.013	5.8168	15.8349	17.211	-5.13934
--					509.513	-0.31413	-0.80481	-2.05116	-3.2908	509.513	5.82948	15.8544	17.2801	-5.10738
--					510.013	-0.3129	-0.80038	-2.02403	-3.24178	510.013	5.84265	15.8741	17.3488	-5.07706
--					510.513	-0.31163	-0.79584	-1.9972	-3.19144	510.513	5.85667	15.8949	17.4172	-5.04551
--					511.013	-0.31039	-0.79165	-1.96937	-3.1444	511.013	5.87055	15.9147	17.4882	-5.01562
--					511.513	-0.30906	-0.78732	-1.94535	-3.09702	511.513	5.88574	15.9355	17.5493	-4.98509
--					512.013	-0.30771	-0.78294	-1.92041	-3.0476	512.013	5.90119	15.957	17.6123	-4.95277
--					512.513	-0.30618	-0.77873	-1.89589	-3.00188	512.513	5.91805	15.9778	17.6735	-4.9224
--					513.013	-0.30477	-0.7745	-1.87258	-2.95784	513.013	5.93277	15.9989	17.731	-4.8927
--					513.513	-0.30302	-0.76993	-1.84856	-2.9136	513.513	5.94982	16.0218	17.7892	-4.86239
--					514.013	-0.30123	-0.76583	-1.82648	-2.8678	514.013	5.96584	16.0423	17.8419	-4.83047
--					514.513	-0.2992	-0.7614	-1.80418	-2.82357	514.513	5.98282	16.0643	17.8942	-4.7991
--					515.013	-0.29696	-0.75685	-1.78227	-2.7819	515.013	6.00057	16.0869	17.9449	-4.76897
--					515.513	-0.29494	-0.75237	-1.76221	-2.74039	515.513	6.01618	16.109	17.9909	-4.73841
--					516.013	-0.29268	-0.74782	-1.74142	-2.70107	516.013	6.03395	16.1313	18.0382	-4.70888
--					516.513	-0.2908	-0.74334	-1.72161	-2.66106	516.513	6.04959	16.1531	18.0834	-4.67821
--					517.013	-0.28907	-0.73885	-1.70177	-2.62226	517.013	6.06566	16.1748	18.1292	-4.64782
--					517.513	-0.28755	-0.73396	-1.68439	-2.58305	517.513	6.08281	16.1985	18.1702	-4.61641
--					518.013	-0.28644	-0.72918	-1.66663	-2.54537	518.013	6.09958	16.2215	18.2133	-4.58551
--					518.513	-0.28574	-0.7244	-1.64976	-2.50508	518.513	6.11672	16.2445	18.2559	-4.55163
--					519.013	-0.28549	-0.7196	-1.63258	-2.4688	519.013	6.13246	16.2678	18.3017	-4.52031
--					519.513	-0.2856	-0.71496	-1.61645	-2.43132	519.513	6.14954	16.2904	18.3472	-4.48709
--					520.013	-0.28599	-0.70971	-1.6006	-2.39507	520.013	6.16579	16.3162	18.3951	-4.45409
--					520.513	-0.28658	-0.70502	-1.58572	-2.36011	520.513	6.18249	16.3396	18.4432	-4.42138
--					521.013	-0.28714	-0.70006	-1.57027	-2.3271	521.013	6.19708	16.3647	18.497	-4.38966
--					521.513	-0.28769	-0.69551	-1.55653	-2.29061	521.513	6.21376	16.3882	18.5486	-4.35359
--					522.013	-0.28799	-0.69073	-1.54349	-2.2555	522.013	6.22862	16.4134	18.6009	-4.31787
--					522.513	-0.28801	-0.68645	-1.52976	-2.22593	522.513	6.24405	16.4367	18.6598	-4.28697
--					523.013	-0.28769	-0.68196	-1.51746	-2.1925	523.013	6.25866	16.4617	18.716	-4.2511
--					523.513	-0.28694	-0.67768	-1.50486	-2.16189	523.513	6.274	16.4864	18.7769	-4.21735
--					524.013	-0.28576	-0.67328	-1.49225	-2.13269	524.013	6.2894	16.5128	18.841	-4.18435
--					524.513	-0.28426	-0.6693	-1.48083	-2.10308	524.513	6.30428	16.5376	18.9016	-4.15007
--					525.013	-0.28245	-0.66543	-1.46904	-2.07517	525.013	6.31906	16.5628	18.9662	-4.11696
--					525.513	-0.28026	-0.66156	-1.45803	-2.04525	525.513	6.33477	16.5891	19.0282	-4.08065
--					526.013	-0.27811	-0.65787	-1.44677	-2.01835	526.013	6.34914	16.6155	19.0927	-4.04725
--					526.513	-0.27567	-0.65423	-1.43638	-1.99082	526.513	6.3647	16.643	19.1527	-4.01234
--					527.013	-0.27308	-0.651	-1.42502	-1.96736	527.013	6.3809	16.6687	19.2184	-3.98202
--					527.513	-0.27058	-0.64809	-1.41489	-1.94139	527.513	6.39654	16.6933	19.2764	-3.94784
--					528.013	-0.26818	-0.64514	-1.40419	-1.91719	528.013	6.41159	16.7197	19.3369	-3.91542
--					528.513	-0.26559	-0.6425	-1.39468	-1.8943	528.513	6.42805	16.7448	19.3895	-3.88428
--					529.013	-0.26297	-0.63996	-1.38325	-1.87162	529.013	6.4448	16.7706	19.4509	-3.85296
--					529.513	-0.26054	-0.63759	-1.37316	-1.84898	529.513	6.46041	16.7964	19.5032	-3.82128
--					530.013	-0.25794	-0.63539	-1.36289	-1.83014	530.013	6.47719	16.8222	19.5545	-3.79461
--					530.513	-0.25552	-0.63323	-1.35202	-1.80893	530.513	6.49287	16.8493	19.6067	-3.76431
--					531.013	-0.25292	-0.6313	-1.34136	-1.78931	531.013	6.50966	16.8758	19.6555	-3.73603
--					531.513	-0.25064	-0.62955	-1.33078	-1.77037	531.513	6.52461	16.9018	19.7019	-3.70855
--					532.013	-0.24832	-0.62787	-1.32045	-1.75097	532.013	6.54005	16.9294	19.7454	-3.68026
--					532.513	-0.24623	-0.6264	-1.31026	-1.73348	532.513	6.55452	16.9559	19.7867	-3.65468
--					533.013	-0.24421	-0.62506	-1.29944	-1.71613	533.013	6.56945	16.9826	19.829	-3.62929
--					533.513	-0.24237	-0.62394	-1.28924	-1.70013	533.513	6.58441	17.0074	19.8675	-3.60589
--					534.013	-0.24078	-0.62293	-1.27852	-1.68404	534.013	6.59938	17.0323	19.9068	-3.58243
--					534.513	-0.2396	-0.62194	-1.26798	-1.66873	534.513	6.61324	17.0598	19.9443	-3.56023
--					535.013	-0.23875	-0.6211	-1.25727	-1.65385	535.013	6.62767	17.086	19.9814	-3.5388
--					535.513	-0.23834	-0.62034	-1.24695	-1.63915	535.513	6.64207	17.1132	20.0162	-3.5178
--					536.013	-0.23838	-0.61967	-1.23674	-1.6253	536.013	6.65479	17.1396	20.0496	-3.49819
--					536.513	-0.2389	-0.61911	-1.22683	-1.61243	536.513	6.66816	17.1647	20.0811	-3.48015
--					537.013	-0.23995	-0.61856	-1.2153	-1.59873	537.013	6.6819	17.1912	20.1164	-3.46115
--					537.513	-0.24155	-0.61806	-1.20594	-1.58648	537.513	6.69565	17.2172	20.1439	-3.4443
--					538.013	-0.24348	-0.61759	-1.19488	-1.57391	538.013	6.70821	17.2427	20.1749	-3.42713
--					538.513	-0.24604	-0.61711	-1.18457	-1.56175	538.513	6.72175	17.2687	20.2021	-3.41062
--					539.013	-0.24915	-0.61661	-1.17453	-1.54994	539.013	6.73575	17.2948	20.2268	-3.39462
--					539.513	-0.25245	-0.61607	-1.16444	-1.53811	539.513	6.74905	17.3213	20.2499	-3.37856
--					540.013	-0.25596	-0.61546	-1.15395	-1.52642	540.013	6.76227	17.3482	20.2718	-3.36258
--					540.513	-0.2598	-0.61481	-1.14441	-1.51544	540.513	6.77635	17.3742	20.2898	-3.34742
--					541.013	-0.2634	-0.61406	-1.13402	-1.5045	541.013	6.78974	17.4006	20.3073	-3.33211
--					541.513	-0.26685	-0.61327	-1.12394	-1.49337	541.513	6.80328	17.4253	20.3223	-3.31623
--					542.013	-0.26982	-0.61233	-1.1144	-1.48238	542.013	6.81601	17.4514	20.3349	-3.30021
--					542.513	-0.27278	-0.61126	-1.10489	-1.47139	542.513	6.83055	17.478	20.3462	-3.28379
--					543.013	-0.27518	-0.61015	-1.09589	-1.46053	543.013	6.84489	17.5026	20.3561	-3.26715
--					543.513	-0.27707	-0.60883	-1.08668	-1.44959	543.513	6.8598	17.5292	20.3662	-3.24995
--					544.013	-0.27829	-0.60745	-1.07821	-1.43864	544.013	6.87381	17.5545	20.376	-3.23228
--					544.513	-0.27905	-0.60589	-1.07025	-1.42769	544.513	6.88968	17.5809	20.3866	-3.2142
--					545.013	-0.2792	-0.60423	-1.06148	-1.41655	545.013	6.90444	17.607	20.4007	-3.19539
--					545.513	-0.27886	-0.60247	-1.05386	-1.40591	545.513	6.91972	17.633	20.4163	-3.17713
--					546.013	-0.27808	-0.60061	-1.04632	-1.39492	546.013	6.93471	17.659	20.4359	-3.15802
--					546.513	-0.27689	-0.59872	-1.03931	-1.38385	546.513	6.95034	17.6842	20.4591	-3.1386
--					547.013	-0.27528	-0.59684	-1.03228	-1.37261	547.013	6.96681	17.7086	20.4885	-3.11886
--					547.513	-0.2735	-0.59477	-1.02545	-1.36089	547.513	6.98248	17.7346	20.5244	-3.09837
--					548.013	-0.27141	-0.59265	-1.01901	-1.35105	548.013	6.99911	17.761	20.566	-3.08135
--					548.513	-0.26941	-0.59054	-1.01278	-1.33978	548.513	7.01406	17.787	20.6148	-3.06222
--					549.013	-0.26733	-0.58858	-1.0068	-1.32859	549.013	7.02913	17.8111	20.6705	-3.04375
--					549.513	-0.26507	-0.58673	-1.00099	-1.31742	549.513	7.04518	17.8343	20.7342	-3.026
--					550.013	-0.26296	-0.58479	-0.99522	-1.30537	550.013	7.06008	17.859	20.8074	-3.00782
--					550.513	-0.26054	-0.58287	-0.99009	-1.2943	550.513	7.07685	17.8842	20.8813	-2.99214
--					551.013	-0.25824	-0.5811	-0.98509	-1.28229	551.013	7.09247	17.9086	20.962	-2.97644
--					551.513	-0.25589	-0.57953	-0.9805	-1.27155	551.513	7.10787	17.9311	21.0433	-2.96375
--					552.013	-0.25357	-0.57801	-0.97582	-1.26023	552.013	7.1222	17.9544	21.1336	-2.95185
--					552.513	-0.25082	-0.57655	-0.97151	-1.24952	552.513	7.13805	17.9785	21.223	-2.94215
--					553.013	-0.24789	-0.57526	-0.96696	-1.2393	553.013	7.15358	18.0016	21.3234	-2.93439
--					553.513	-0.24458	-0.5741	-0.96283	-1.2274	553.513	7.16956	18.0242	21.4193	-2.92735
--					554.013	-0.24113	-0.57302	-0.95851	-1.21708	554.013	7.18493	18.0479	21.5238	-2.92307
--					554.513	-0.23747	-0.57213	-0.95406	-1.20659	554.513	7.20011	18.0695	21.6351	-2.92054
--					555.013	-0.23352	-0.57132	-0.94967	-1.195	555.013	7.21574	18.0917	21.7471	-2.91995
--					555.513	-0.22952	-0.57063	-0.94566	-1.18563	555.513	7.23117	18.1133	21.8506	-2.9212
--					556.013	-0.22555	-0.57002	-0.94129	-1.17496	556.013	7.24654	18.135	21.9631	-2.92454
--					556.513	-0.22138	-0.56948	-0.93717	-1.16506	556.513	7.26338	18.1579	22.068	-2.92945
--					557.013	-0.21775	-0.56904	-0.93313	-1.15515	557.013	7.2792	18.1788	22.1691	-2.93609
--					557.513	-0.21417	-0.56866	-0.92898	-1.14534	557.513	7.29705	18.2001	22.2698	-2.94432
--					558.013	-0.21147	-0.56833	-0.92511	-1.13618	558.013	7.31332	18.2214	22.3604	-2.95342
--					558.513	-0.20926	-0.56803	-0.92095	-1.12654	558.513	7.33085	18.244	22.4537	-2.96435
--					559.013	-0.20775	-0.56779	-0.91701	-1.1175	559.013	7.34908	18.2648	22.5379	-2.97576
--					559.513	-0.20707	-0.56757	-0.91288	-1.10913	559.513	7.36634	18.2864	22.6212	-2.98718
--					560.013	-0.2071	-0.56737	-0.90896	-1.10003	560.013	7.3852	18.3087	22.696	-3.00036
--					560.513	-0.20779	-0.56719	-0.90475	-1.09232	560.513	7.40268	18.3313	22.7715	-3.01194
--					561.013	-0.20914	-0.56704	-0.90065	-1.08409	561.013	7.42186	18.3521	22.8403	-3.02451
--					561.513	-0.21091	-0.5669	-0.89644	-1.07653	561.513	7.44026	18.3744	22.9067	-3.03599
--					562.013	-0.21318	-0.56677	-0.89243	-1.06946	562.013	7.45985	18.3981	22.9661	-3.04642
--					562.513	-0.21582	-0.56667	-0.88823	-1.06197	562.513	7.48044	18.4208	23.0244	-3.05685
--					563.013	-0.21885	-0.56659	-0.88426	-1.05473	563.013	7.50295	18.4456	23.0766	-3.06593
--					563.513	-0.2217	-0.56653	-0.87985	-1.04851	563.513	7.52422	18.468	23.1312	-3.07262
--					564.013	-0.2243	-0.56648	-0.87601	-1.04249	564.013	7.54457	18.4936	23.1763	-3.07776
--					564.513	-0.22697	-0.56645	-0.87177	-1.03634	564.513	7.56734	18.5177	23.2239	-3.08124
--					565.013	-0.22925	-0.56644	-0.86787	-1.03074	565.013	7.58948	18.5435	23.2658	-3.08247
--					565.513	-0.23121	-0.56644	-0.86392	-1.02538	565.513	7.61271	18.5694	23.3067	-3.08147
--					566.013	-0.23276	-0.56644	-0.85985	-1.02012	566.013	7.63741	18.5949	23.3474	-3.07792
--					566.513	-0.23366	-0.56644	-0.85585	-1.01527	566.513	7.66047	18.6221	23.3862	-3.07197
--					567.013	-0.23399	-0.56643	-0.8516	-1.01045	567.013	7.68285	18.6493	23.4263	-3.06296
--					567.513	-0.2337	-0.56639	-0.84731	-1.00615	567.513	7.70798	18.6788	23.4657	-3.05188
--					568.013	-0.2327	-0.56632	-0.84363	-1.0019	568.013	7.73363	18.707	23.4988	-3.03764
--					568.513	-0.23114	-0.56619	-0.83978	-0.99801	568.513	7.75765	18.7375	23.5328	-3.02135
--					569.013	-0.22903	-0.56599	-0.8359	-0.99431	569.013	7.78181	18.7678	23.5664	-3.00261
--					569.513	-0.22646	-0.56569	-0.83199	-0.99077	569.513	7.80611	18.7991	23.5996	-2.98139
--					570.013	-0.22376	-0.56529	-0.82828	-0.98736	570.013	7.82889	18.8301	23.6304	-2.95787
--					570.513	-0.22087	-0.56477	-0.82434	-0.98405	570.513	7.85229	18.8611	23.6623	-2.93181
--					571.013	-0.21828	-0.56413	-0.82073	-0.98099	571.013	7.87379	18.8921	23.691	-2.90507
--					571.513	-0.21567	-0.56328	-0.81702	-0.97788	571.513	7.89766	18.9261	23.7196	-2.87529
--					572.013	-0.21357	-0.56224	-0.81342	-0.9749	572.013	7.9212	18.9603	23.7467	-2.84465
--					572.513	-0.212	-0.56106	-0.80989	-0.97188	572.513	7.94634	18.9934	23.7724	-2.81165
--					573.013	-0.21127	-0.55963	-0.8063	-0.96888	573.013	7.9693	19.0283	23.7978	-2.77756
--					573.513	-0.21121	-0.55813	-0.80289	-0.96606	573.513	7.993	19.0607	23.8211	-2.74448
--					574.013	-0.21195	-0.55631	-0.79941	-0.9633	574.013	8.0202	19.096	23.844	-2.71181
--					574.513	-0.21328	-0.55434	-0.79626	-0.96033	574.513	8.04566	19.1306	23.8642	-2.67664
--					575.013	-0.21518	-0.55218	-0.79288	-0.95724	575.013	8.0726	19.1656	23.8851	-2.64035
--					575.513	-0.21747	-0.54964	-0.78978	-0.95443	575.513	8.10032	19.2038	23.9036	-2.60809
--					576.013	-0.22016	-0.54714	-0.78667	-0.95099	576.013	8.13087	19.2391	23.9217	-2.56976
--					576.513	-0.22293	-0.54429	-0.78381	-0.94795	576.513	8.16242	19.2775	23.938	-2.53705
--					577.013	-0.2253	-0.54148	-0.78093	-0.94468	577.013	8.19112	19.3139	23.9542	-2.50338
--					577.513	-0.22776	-0.53843	-0.77817	-0.94129	577.513	8.22444	19.3524	23.9695	-2.47007
--					578.013	-0.2297	-0.53531	-0.77549	-0.93764	578.013	8.25536	19.3912	23.9842	-2.4361
--					578.513	-0.23144	-0.53222	-0.77317	-0.93393	578.513	8.29006	19.4298	23.9971	-2.4033
--					579.013	-0.23268	-0.52932	-0.77088	-0.93011	579.013	8.32376	19.4664	24.0099	-2.3715
--					579.513	-0.23352	-0.52642	-0.76862	-0.92586	579.513	8.35893	19.504	24.0227	-2.33814
--					580.013	-0.23391	-0.52368	-0.76667	-0.92193	580.013	8.39275	19.541	24.0342	-2.30896
--					580.513	-0.23394	-0.52104	-0.76475	-0.91782	580.513	8.42754	19.5789	24.0457	-2.28017
--					581.013	-0.23361	-0.51857	-0.76313	-0.91343	581.013	8.46218	19.6172	24.0558	-2.25095
--					581.513	-0.23299	-0.5162	-0.76155	-0.90911	581.513	8.49623	19.658	24.066	-2.22364
--					582.013	-0.232	-0.51428	-0.76012	-0.90463	582.013	8.5328	19.6958	24.0756	-2.19662
--					582.513	-0.23081	-0.51264	-0.75876	-0.90027	582.513	8.56697	19.7338	24.0851	-2.17143
--					583.013	-0.22932	-0.51123	-0.75764	-0.89544	583.013	8.60226	19.7749	24.0933	-2.14458
--					583.513	-0.22767	-0.51021	-0.75661	-0.89071	583.513	8.63541	19.8157	24.101	-2.11915
--					584.013	-0.22576	-0.50961	-0.75571	-0.88594	584.013	8.66917	19.8557	24.1078	-2.09429
--					584.513	-0.22362	-0.50941	-0.75502	-0.88123	584.513	8.70301	19.8969	24.113	-2.07027
--					585.013	-0.22127	-0.50961	-0.75438	-0.87626	585.013	8.73698	19.9365	24.1173	-2.04543
--					585.513	-0.21896	-0.5102	-0.7539	-0.87114	585.513	8.76845	19.9759	24.1198	-2.02011
--					586.013	-0.21644	-0.51123	-0.75353	-0.86616	586.013	8.80159	20.0176	24.1206	-1.99573
--					586.513	-0.21385	-0.51264	-0.75324	-0.8611	586.513	8.8358	20.059	24.1195	-1.97105
--					587.013	-0.21159	-0.51442	-0.75302	-0.85616	587.013	8.86715	20.1	24.116	-1.94692
--					587.513	-0.20937	-0.51659	-0.75286	-0.85104	587.513	8.90122	20.142	24.1103	-1.92178
--					588.013	-0.20782	-0.51878	-0.75274	-0.84612	588.013	8.92942	20.1791	24.1011	-1.89746
--					588.513	-0.20645	-0.52147	-0.75265	-0.84096	588.513	8.96118	20.2203	24.0889	-1.87163
--					589.013	-0.20555	-0.52415	-0.75258	-0.83605	589.013	8.9927	20.2582	24.0742	-1.84675
--					589.513	-0.20511	-0.52711	-0.75249	-0.83125	589.513	9.02535	20.2975	24.0567	-1.82213
--					590.013	-0.20513	-0.53035	-0.75236	-0.82631	590.013	9.05601	20.3386	24.0328	-1.7964
--					590.513	-0.20561	-0.5338	-0.75218	-0.82131	590.513	9.09119	20.3809	24.0057	-1.76988
--					591.013	-0.20645	-0.53726	-0.75192	-0.81601	591.013	9.12615	20.4225	23.9744	-1.74131
--					591.513	-0.20742	-0.54097	-0.75156	-0.81147	591.513	9.15836	20.4669	23.9382	-1.7165
--					592.013	-0.20855	-0.54411	-0.75114	-0.80675	592.013	9.19332	20.5048	23.9019	-1.69026
--					592.513	-0.2096	-0.54742	-0.75052	-0.80231	592.513	9.22695	20.5456	23.8568	-1.66524
--					593.013	-0.21058	-0.55103	-0.74978	-0.79769	593.013	9.26449	20.5915	23.8091	-1.6389
--					593.513	-0.21124	-0.55424	-0.74888	-0.79337	593.513	9.30074	20.6344	23.7573	-1.61398
--					594.013	-0.21155	-0.5574	-0.74781	-0.78908	594.013	9.33682	20.6795	23.7019	-1.58904
--					594.513	-0.21146	-0.56036	-0.74655	-0.78519	594.513	9.37303	20.7253	23.6422	-1.56624
--					595.013	-0.21091	-0.56288	-0.74505	-0.78116	595.013	9.41263	20.7683	23.5772	-1.54249
--					595.513	-0.20997	-0.56515	-0.7435	-0.7774	595.513	9.44959	20.8116	23.5142	-1.52023
--					596.013	-0.20873	-0.56715	-0.74167	-0.77406	596.013	9.48479	20.8553	23.4439	-1.5005
--					596.513	-0.20703	-0.56896	-0.73987	-0.77046	596.513	9.52394	20.9021	23.3781	-1.47923
--					597.013	-0.20519	-0.57031	-0.73776	-0.76745	597.013	9.56051	20.9449	23.3037	-1.46152
--					597.513	-0.20313	-0.57135	-0.73554	-0.76473	597.513	9.59846	20.9862	23.2278	-1.44561
--					598.013	-0.2012	-0.57218	-0.73313	-0.76193	598.013	9.63255	21.0316	23.1472	-1.42943
--					598.513	-0.19917	-0.57269	-0.73069	-0.7594	598.513	9.66889	21.075	23.0668	-1.41494
--					599.013	-0.19738	-0.57293	-0.72819	-0.75742	599.013	9.70269	21.1214	22.9848	-1.40375
--					599.513	-0.19589	-0.57289	-0.7255	-0.75541	599.513	9.73336	21.1627	22.8967	-1.39261
--					600.013	-0.19453	-0.57261	-0.72293	-0.75367	600.013	9.76559	21.2064	22.8119	-1.38317
--					600.513	-0.19342	-0.57207	-0.72017	-0.75236	600.513	9.79822	21.2523	22.7193	-1.37618
--					601.013	-0.19267	-0.57134	-0.71745	-0.75119	601.013	9.82844	21.2959	22.6263	-1.37016
--					601.513	-0.19222	-0.57038	-0.7149	-0.75024	601.513	9.8582	21.3406	22.5373	-1.36538
--					602.013	-0.19204	-0.5692	-0.71231	-0.74959	602.013	9.8904	21.3869	22.4441	-1.3623
--					602.513	-0.19215	-0.56784	-0.70977	-0.74916	602.513	9.92208	21.4335	22.3499	-1.3604
--					603.013	-0.19244	-0.56633	-0.70715	-0.74902	603.013	9.95188	21.4799	22.2494	-1.35995
--					603.513	-0.19285	-0.56476	-0.70477	-0.74911	603.513	9.98037	21.5243	22.1548	-1.36061
--					604.013	-0.19338	-0.56305	-0.70233	-0.74942	604.013	10.0125	21.5696	22.0543	-1.36228
--					604.513	-0.19387	-0.56126	-0.70021	-0.74995	604.513	10.0417	21.6152	21.9637	-1.36487
--					605.013	-0.19439	-0.55938	-0.69798	-0.75074	605.013	10.0749	21.6614	21.8651	-1.36859
--					605.513	-0.19482	-0.55744	-0.69601	-0.75168	605.513	10.1064	21.7078	21.7755	-1.37289
--					606.013	-0.1952	-0.5556	-0.694	-0.75277	606.013	10.1397	21.7516	21.6817	-1.37775
--					606.513	-0.19554	-0.55357	-0.69193	-0.75406	606.513	10.1737	21.7996	21.5821	-1.38338
--					607.013	-0.19586	-0.55177	-0.68998	-0.75553	607.013	10.2088	21.8425	21.487	-1.38973
--					607.513	-0.19618	-0.54991	-0.68804	-0.75708	607.513	10.2411	21.8878	21.3915	-1.39637
--					608.013	-0.19659	-0.54814	-0.68612	-0.75873	608.013	10.2758	21.9318	21.2962	-1.40347
--					608.513	-0.19708	-0.54637	-0.68424	-0.76031	608.513	10.3084	21.9775	21.2033	-1.41033
--					609.013	-0.19773	-0.54479	-0.68214	-0.7622	609.013	10.3422	22.0199	21.1009	-1.41867
--					609.513	-0.19855	-0.54331	-0.68001	-0.76398	609.513	10.3761	22.062	20.999	-1.42681
--					610.013	-0.19959	-0.54194	-0.678	-0.76584	610.013	10.4111	22.1034	20.9051	-1.43568
--					610.513	-0.20073	-0.54058	-0.67573	-0.76758	610.513	10.4441	22.1475	20.8018	-1.4445
--					611.013	-0.20193	-0.53939	-0.67347	-0.76931	611.013	10.4759	22.1896	20.7023	-1.45384
--					611.513	-0.20303	-0.53828	-0.67112	-0.77111	611.513	10.5039	22.2334	20.6028	-1.46451
--					612.013	-0.20426	-0.53736	-0.66867	-0.77272	612.013	10.5362	22.2738	20.5028	-1.47508
--					612.513	-0.20529	-0.53655	-0.66603	-0.77427	612.513	10.5671	22.3154	20.3991	-1.48666
--					613.013	-0.20599	-0.53584	-0.6633	-0.77565	613.013	10.5941	22.3588	20.2965	-1.49862
--					613.513	-0.2065	-0.53534	-0.66062	-0.77689	613.513	10.6257	22.3971	20.2	-1.51151
--					614.013	-0.2066	-0.53492	-0.65755	-0.77791	614.013	10.6549	22.4392	20.0938	-1.52472
--					614.513	-0.20635	-0.53466	-0.65489	-0.77873	614.513	10.6826	22.4786	20.0052	-1.53866
--					615.013	-0.20563	-0.53453	-0.65184	-0.77931	615.013	10.7154	22.5183	19.9067	-1.5528
--					615.513	-0.2046	-0.53454	-0.6488	-0.77968	615.513	10.7461	22.5593	19.8119	-1.56775
--					616.013	-0.20335	-0.53467	-0.64595	-0.77983	616.013	10.7762	22.5971	19.7255	-1.58429
--					616.513	-0.20195	-0.53491	-0.64285	-0.77973	616.513	10.8062	22.6342	19.6334	-1.59982
--					617.013	-0.20037	-0.53528	-0.63988	-0.77932	617.013	10.8385	22.6716	19.5465	-1.61959
--					617.513	-0.19909	-0.5358	-0.63702	-0.77866	617.513	10.8655	22.7113	19.4636	-1.63868
--					618.013	-0.1976	-0.53637	-0.63406	-0.77775	618.013	10.9005	22.7474	19.3786	-1.65798
--					618.513	-0.19646	-0.53708	-0.63118	-0.77647	618.513	10.9323	22.785	19.2954	-1.67973
--					619.013	-0.19557	-0.53782	-0.62825	-0.77517	619.013	10.9656	22.8196	19.2102	-1.69857
--					619.513	-0.19501	-0.53878	-0.62552	-0.77338	619.513	10.9985	22.8593	19.1299	-1.72145
--					620.013	-0.1948	-0.5397	-0.62279	-0.77131	620.013	11.0299	22.8941	19.0481	-1.74507
--					620.513	-0.19487	-0.54078	-0.62004	-0.76911	620.513	11.0613	22.9322	18.9642	-1.76819
--					621.013	-0.19521	-0.54181	-0.61748	-0.76645	621.013	11.0939	22.9665	18.8844	-1.79416
--					621.513	-0.19578	-0.54292	-0.61484	-0.76374	621.513	11.1273	23.0018	18.8004	-1.81915
--					622.013	-0.19643	-0.54404	-0.61223	-0.7608	622.013	11.1579	23.0363	18.7155	-1.84492
--					622.513	-0.19714	-0.5451	-0.60969	-0.75748	622.513	11.1882	23.0686	18.6314	-1.87286
--					623.013	-0.19787	-0.54621	-0.60719	-0.75409	623.013	11.2187	23.1021	18.5475	-1.90047
--					623.513	-0.19857	-0.54733	-0.60472	-0.75046	623.513	11.2506	23.1361	18.4638	-1.92939
--					624.013	-0.19913	-0.54835	-0.60222	-0.74674	624.013	11.28	23.1678	18.3791	-1.95845
--					624.513	-0.19956	-0.54936	-0.59966	-0.74295	624.513	11.3089	23.2002	18.2925	-1.98774
--					625.013	-0.19985	-0.55033	-0.59728	-0.73867	625.013	11.3378	23.2328	18.2124	-2.02058
--					625.513	-0.19996	-0.55123	-0.59453	-0.73463	625.513	11.3679	23.2647	18.1215	-2.05163
--					626.013	-0.1999	-0.55205	-0.592	-0.73035	626.013	11.396	23.2966	18.0396	-2.08461
--					626.513	-0.19964	-0.55279	-0.58934	-0.72606	626.513	11.4252	23.3284	17.9554	-2.11795
--					627.013	-0.1992	-0.55346	-0.58652	-0.72151	627.013	11.4527	23.3606	17.8683	-2.15382
--					627.513	-0.19859	-0.55402	-0.58375	-0.71699	627.513	11.4797	23.3919	17.7854	-2.19012
--					628.013	-0.19779	-0.55444	-0.58099	-0.71249	628.013	11.5071	23.4201	17.7047	-2.22702
--					628.513	-0.19674	-0.55481	-0.57811	-0.70796	628.513	11.5356	23.4509	17.6226	-2.26508
--					629.013	-0.19556	-0.55509	-0.57542	-0.70317	629.013	11.5629	23.4818	17.5478	-2.30653
--					629.513	-0.19415	-0.55525	-0.57248	-0.69845	629.513	11.5913	23.5116	17.4674	-2.34864
--					630.013	-0.19265	-0.55533	-0.56948	-0.6936	630.013	11.6186	23.5424	17.3867	-2.39346
--					630.513	-0.19101	-0.55532	-0.56644	-0.68865	630.513	11.6464	23.5719	17.3054	-2.44107
--					631.013	-0.18933	-0.55521	-0.5636	-0.68393	631.013	11.674	23.6014	17.2295	-2.48822
--					631.513	-0.18752	-0.55503	-0.56057	-0.67922	631.513	11.7039	23.6314	17.1482	-2.53729
--					632.013	-0.18587	-0.55475	-0.55769	-0.67453	632.013	11.7325	23.662	17.0693	-2.58819
--					632.513	-0.18454	-0.55441	-0.5549	-0.66975	632.513	11.7577	23.6914	16.9913	-2.64252
--					633.013	-0.18327	-0.55401	-0.55205	-0.66513	633.013	11.786	23.7201	16.9088	-2.69732
--					633.513	-0.18225	-0.55355	-0.54944	-0.66063	633.513	11.8153	23.7488	16.8296	-2.75327
--					634.013	-0.18159	-0.55303	-0.54708	-0.65598	634.013	11.8446	23.7773	16.754	-2.81389
--					634.513	-0.1813	-0.55244	-0.54463	-0.65179	634.513	11.8732	23.8065	16.6702	-2.87112
--					635.013	-0.18136	-0.55183	-0.54241	-0.64722	635.013	11.9024	23.8342	16.5881	-2.93648
--					635.513	-0.18174	-0.55117	-0.54033	-0.6431	635.513	11.9321	23.8623	16.5037	-2.99832
--					636.013	-0.1823	-0.55047	-0.53843	-0.63886	636.013	11.9582	23.8896	16.4181	-3.06528
--					636.513	-0.18313	-0.54974	-0.53678	-0.63461	636.513	11.9897	23.9165	16.3339	-3.13572
--					637.013	-0.1839	-0.54894	-0.53531	-0.63081	637.013	12.0176	23.9442	16.2478	-3.20215
--					637.513	-0.18463	-0.54817	-0.53405	-0.62699	637.513	12.0461	23.9697	16.1606	-3.2721
--					638.013	-0.18519	-0.54728	-0.53303	-0.6234	638.013	12.0766	23.9975	16.0756	-3.34137
--					638.513	-0.18541	-0.54636	-0.53217	-0.6197	638.513	12.1053	24.0247	15.986	-3.41659
--					639.013	-0.18523	-0.54548	-0.53151	-0.61634	639.013	12.1324	24.0495	15.8958	-3.48834
--					639.513	-0.18455	-0.54448	-0.53106	-0.61292	639.513	12.1609	24.0765	15.8071	-3.56575
--					640.013	-0.18328	-0.54345	-0.53077	-0.60993	640.013	12.1897	24.1028	15.7129	-3.63728
--					640.513	-0.18154	-0.54243	-0.53066	-0.60696	640.513	12.2163	24.1281	15.6166	-3.71216
--					641.013	-0.17946	-0.54126	-0.5307	-0.60412	641.013	12.2408	24.1557	15.5231	-3.78805
--					641.513	-0.17684	-0.54021	-0.53091	-0.60145	641.513	12.2661	24.1797	15.4193	-3.86348
--					642.013	-0.17417	-0.53902	-0.53125	-0.59905	642.013	12.2888	24.2059	15.3168	-3.93534
--					642.513	-0.17114	-0.53782	-0.53171	-0.59646	642.513	12.3126	24.2316	15.2129	-4.0178
--					643.013	-0.16812	-0.53655	-0.53227	-0.59435	643.013	12.336	24.2579	15.1082	-4.08951
--					643.513	-0.16551	-0.53535	-0.53287	-0.5922	643.513	12.3573	24.2823	15.0078	-4.16712
--					644.013	-0.16331	-0.53401	-0.53355	-0.59016	644.013	12.3779	24.3089	14.9051	-4.24583
--					644.513	-0.16162	-0.53273	-0.53433	-0.58838	644.513	12.3988	24.334	14.796	-4.31887
--					645.013	-0.16072	-0.53135	-0.53509	-0.58657	645.013	12.417	24.3604	14.6928	-4.39853
--					645.513	-0.16043	-0.53003	-0.5359	-0.58489	645.513	12.4366	24.3854	14.5871	-4.47809
--					646.013	-0.16084	-0.52863	-0.53673	-0.58332	646.013	12.4556	24.4116	14.481	-4.55785
--					646.513	-0.16205	-0.52731	-0.53751	-0.58191	646.513	12.4769	24.436	14.3812	-4.63481
--					647.013	-0.16392	-0.52583	-0.5383	-0.58051	647.013	12.4984	24.4627	14.2807	-4.71759
--					647.513	-0.16606	-0.52442	-0.53912	-0.57925	647.513	12.518	24.4881	14.1742	-4.79806
--					648.013	-0.16873	-0.5231	-0.53984	-0.57803	648.013	12.54	24.5114	14.0795	-4.88232
--					648.513	-0.17153	-0.52173	-0.54054	-0.57705	648.513	12.5623	24.535	13.983	-4.95614
--					649.013	-0.17454	-0.52031	-0.54113	-0.57603	649.013	12.5866	24.5591	13.8946	-5.03876
--					649.513	-0.17741	-0.51883	-0.54165	-0.57511	649.513	12.6115	24.5833	13.8098	-5.12047
--					650.013	-0.18007	-0.51728	-0.54206	-0.57424	650.013	12.6375	24.6081	13.7324	-5.205
--					650.513	-0.1822	-0.51572	-0.54237	-0.57351	650.513	12.6622	24.6319	13.6543	-5.28285
--					651.013	-0.18419	-0.51412	-0.54256	-0.57282	651.013	12.691	24.6555	13.5794	-5.36378
--					651.513	-0.18549	-0.51232	-0.54258	-0.57221	651.513	12.7161	24.6809	13.5133	-5.44308
--					652.013	-0.18636	-0.51068	-0.54246	-0.57165	652.013	12.7409	24.7028	13.4533	-5.52402
--					652.513	-0.18691	-0.50883	-0.54216	-0.57113	652.513	12.7683	24.7263	13.3937	-5.60733
--					653.013	-0.18705	-0.50698	-0.54167	-0.57072	653.013	12.7924	24.7486	13.3352	-5.68412
--					653.513	-0.18688	-0.50496	-0.541	-0.5703	653.513	12.8183	24.7717	13.2807	-5.77292
--					654.013	-0.18641	-0.50281	-0.54006	-0.56997	654.013	12.8455	24.7949	13.2242	-5.85744
--					654.513	-0.18584	-0.50065	-0.539	-0.5697	654.513	12.8681	24.817	13.1735	-5.93947
--					655.013	-0.18516	-0.49834	-0.53757	-0.56948	655.013	12.8908	24.8395	13.1173	-6.02425
--					655.513	-0.18451	-0.49585	-0.53599	-0.56932	655.513	12.9105	24.8624	13.064	-6.10534
--					656.013	-0.18375	-0.4934	-0.53414	-0.5692	656.013	12.9328	24.8839	13.0093	-6.19339
--					656.513	-0.18313	-0.49069	-0.53199	-0.56913	656.513	12.952	24.9067	12.9523	-6.28593
--					657.013	-0.18251	-0.48814	-0.52965	-0.56911	657.013	12.9724	24.9273	12.8955	-6.36897
--					657.513	-0.18204	-0.48533	-0.52696	-0.56914	657.513	12.9902	24.9493	12.8351	-6.45786
--					658.013	-0.18165	-0.4827	-0.52409	-0.56921	658.013	13.0079	24.9694	12.7745	-6.54635
--					658.513	-0.18132	-0.47981	-0.52097	-0.56932	658.513	13.0257	24.991	12.7124	-6.63867
--					659.013	-0.18105	-0.47703	-0.51748	-0.56946	659.013	13.0443	25.0116	12.6463	-6.72842
--					659.513	-0.18085	-0.47429	-0.51389	-0.56962	659.513	13.0609	25.0316	12.5812	-6.81606
--					660.013	-0.18067	-0.47147	-0.50998	-0.5698	660.013	13.0786	25.0524	12.513	-6.90801
--					660.513	-0.1805	-0.46873	-0.50615	-0.57	660.513	13.0982	25.0728	12.4483	-7.00008
--					661.013	-0.18032	-0.46621	-0.50209	-0.57021	661.013	13.1167	25.0918	12.3819	-7.09452
--					661.513	-0.1801	-0.4635	-0.49768	-0.57041	661.513	13.1352	25.1129	12.3115	-7.18753
--					662.013	-0.17982	-0.46107	-0.4933	-0.57058	662.013	13.1545	25.1324	12.2432	-7.27931
--					662.513	-0.17945	-0.45872	-0.48828	-0.57072	662.513	13.174	25.1522	12.1664	-7.36811
--					663.013	-0.17895	-0.45648	-0.48367	-0.57082	663.013	13.1941	25.1721	12.0969	-7.45433
--					663.513	-0.17832	-0.45436	-0.479	-0.57086	663.513	13.2139	25.1922	12.0272	-7.53831
--					664.013	-0.17751	-0.45241	-0.47401	-0.57084	664.013	13.2345	25.2121	11.9533	-7.62665
--					664.513	-0.17651	-0.45052	-0.46938	-0.57074	664.513	13.2555	25.2335	11.8846	-7.71338
--					665.013	-0.17532	-0.44901	-0.46453	-0.57054	665.013	13.2768	25.2525	11.8126	-7.79721
--					665.513	-0.17405	-0.44766	-0.45985	-0.57024	665.513	13.2967	25.2717	11.7426	-7.88173
--					666.013	-0.17259	-0.44644	-0.45542	-0.56985	666.013	13.3176	25.2918	11.6757	-7.95974
--					666.513	-0.171	-0.44542	-0.45096	-0.56926	666.513	13.3385	25.3121	11.6071	-8.04556
--					667.013	-0.16942	-0.44463	-0.44664	-0.56855	667.013	13.3585	25.3316	11.5395	-8.12689
--					667.513	-0.16792	-0.44401	-0.44237	-0.56771	667.513	13.3772	25.3528	11.4708	-8.20424
--					668.013	-0.16663	-0.44363	-0.43825	-0.56658	668.013	13.3934	25.3726	11.4028	-8.2889
--					668.513	-0.16539	-0.44345	-0.43418	-0.56533	668.513	13.4097	25.394	11.3334	-8.36697
--					669.013	-0.1643	-0.4435	-0.43046	-0.56392	669.013	13.4247	25.4142	11.2674	-8.44265
--					669.513	-0.16321	-0.44376	-0.42665	-0.56234	669.513	13.4409	25.4352	11.1971	-8.51569
--					670.013	-0.16227	-0.44424	-0.42295	-0.56036	670.013	13.4563	25.4567	11.1255	-8.59628
--					670.513	-0.16159	-0.44486	-0.41966	-0.55838	670.513	13.4684	25.4763	11.0585	-8.66761
--					671.013	-0.16088	-0.44579	-0.41661	-0.55608	671.013	13.4811	25.4993	10.9931	-8.74229
--					671.513	-0.1602	-0.4468	-0.41346	-0.55359	671.513	13.4927	25.52	10.9213	-8.81566
--					672.013	-0.15949	-0.4479	-0.41063	-0.55084	672.013	13.5031	25.5398	10.8528	-8.88981
--					672.513	-0.15867	-0.44915	-0.40786	-0.54805	672.513	13.5128	25.56	10.781	-8.95975
--					673.013	-0.15748	-0.45055	-0.40532	-0.54493	673.013	13.5242	25.5808	10.7107	-9.03273
--					673.513	-0.15627	-0.45202	-0.40304	-0.54167	673.513	13.5335	25.6014	10.6436	-9.10478
--					674.013	-0.15477	-0.45354	-0.40062	-0.53813	674.013	13.5435	25.622	10.5671	-9.17891
--					674.513	-0.15311	-0.45511	-0.3986	-0.53441	674.513	13.5535	25.6425	10.4994	-9.25355
--					675.013	-0.15134	-0.45666	-0.3965	-0.53068	675.013	13.5638	25.6626	10.4245	-9.32579
--					675.513	-0.14924	-0.45824	-0.39436	-0.52676	675.513	13.5761	25.6832	10.3438	-9.39919
--					676.013	-0.14755	-0.45974	-0.39251	-0.52255	676.013	13.5865	25.7033	10.2706	-9.47635
--					676.513	-0.14578	-0.46118	-0.39054	-0.51855	676.513	13.5986	25.7234	10.1895	-9.54813
--					677.013	-0.14412	-0.46258	-0.38854	-0.51433	677.013	13.6119	25.7444	10.1046	-9.62301
--					677.513	-0.14279	-0.46382	-0.38671	-0.51018	677.513	13.6251	25.7646	10.0254	-9.69603
--					678.013	-0.14178	-0.46492	-0.38492	-0.50571	678.013	13.6385	25.785	9.94759	-9.77429
--					678.513	-0.14107	-0.4658	-0.38301	-0.50142	678.513	13.6528	25.804	9.86495	-9.84967
--					679.013	-0.1407	-0.46652	-0.3812	-0.49705	679.013	13.6663	25.8237	9.7872	-9.92681
--					679.513	-0.14061	-0.46703	-0.37925	-0.49252	679.513	13.6813	25.8433	9.70598	-10.0077
--					680.013	-0.14075	-0.4673	-0.37721	-0.48806	680.013	13.6953	25.8617	9.6231	-10.0886
--					680.513	-0.1411	-0.46735	-0.37528	-0.48378	680.513	13.7105	25.8801	9.54782	-10.1679
--					681.013	-0.1415	-0.46718	-0.37315	-0.47951	681.013	13.7238	25.8983	9.46812	-10.249
--					681.513	-0.14195	-0.46676	-0.37087	-0.47523	681.513	13.7378	25.9166	9.38697	-10.3326
--					682.013	-0.14235	-0.46617	-0.36867	-0.47106	682.013	13.7522	25.9326	9.31255	-10.417
--					682.513	-0.14258	-0.4653	-0.36644	-0.4669	682.513	13.7644	25.9501	9.2405	-10.5049
--					683.013	-0.14262	-0.46429	-0.36398	-0.46305	683.013	13.7773	25.966	9.16446	-10.5896
--					683.513	-0.1424	-0.46296	-0.3615	-0.45919	683.513	13.79	25.983	9.09105	-10.6789
--					684.013	-0.14189	-0.46147	-0.35879	-0.45548	684.013	13.8021	25.9992	9.01414	-10.7693
--					684.513	-0.14117	-0.45983	-0.35632	-0.45183	684.513	13.8124	26.0146	8.94609	-10.8632
--					685.013	-0.14003	-0.45802	-0.35367	-0.44829	685.013	13.8239	26.0298	8.87499	-10.96
--					685.513	-0.13867	-0.45616	-0.35111	-0.44495	685.513	13.8344	26.0439	8.80741	-11.0573
--					686.013	-0.13696	-0.45401	-0.34829	-0.44173	686.013	13.8453	26.0587	8.734	-11.1574
--					686.513	-0.13531	-0.45183	-0.34565	-0.43861	686.513	13.8545	26.0727	8.66576	-11.2608
--					687.013	-0.13333	-0.44943	-0.34302	-0.43564	687.013	13.8648	26.087	8.59769	-11.3663
--					687.513	-0.13128	-0.44701	-0.34022	-0.43263	687.513	13.8751	26.1006	8.52494	-11.4812
--					688.013	-0.12929	-0.44456	-0.3375	-0.42966	688.013	13.8854	26.1136	8.45334	-11.6029
--					688.513	-0.12754	-0.44209	-0.33483	-0.42676	688.513	13.895	26.1263	8.38234	-11.731
--					689.013	-0.1259	-0.43966	-0.33225	-0.42407	689.013	13.9054	26.1383	8.31264	-11.8584
--					689.513	-0.12458	-0.43718	-0.32964	-0.42144	689.513	13.9154	26.1501	8.24053	-11.9924
--					690.013	-0.12357	-0.43479	-0.32729	-0.41893	690.013	13.9256	26.1612	8.17426	-12.1298
--					690.513	-0.1229	-0.43225	-0.32472	-0.41671	690.513	13.9364	26.1728	8.09928	-12.2589
--					691.013	-0.12265	-0.42979	-0.32253	-0.4146	691.013	13.9466	26.1838	8.03323	-12.3895
--					691.513	-0.12279	-0.42738	-0.32027	-0.41246	691.513	13.9562	26.1945	7.96229	-12.5286
--					692.013	-0.12333	-0.42511	-0.3183	-0.41051	692.013	13.9666	26.2045	7.89731	-12.6631
--					692.513	-0.1242	-0.42291	-0.31635	-0.40857	692.513	13.976	26.2141	7.82889	-12.8033
--					693.013	-0.1255	-0.42077	-0.31455	-0.40678	693.013	13.9857	26.2233	7.76129	-12.9377
--					693.513	-0.12673	-0.41865	-0.31301	-0.40503	693.513	13.9928	26.2325	7.6981	-13.0748
--					694.013	-0.12841	-0.41671	-0.31164	-0.40331	694.013	14.0006	26.241	7.63628	-13.2145
--					694.513	-0.13011	-0.41486	-0.3103	-0.4017	694.513	14.0071	26.249	7.568	-13.3499
--					695.013	-0.13186	-0.41316	-0.30919	-0.40007	695.013	14.0126	26.2565	7.50258	-13.4898
--					695.513	-0.13353	-0.41161	-0.30823	-0.39856	695.513	14.0168	26.2633	7.4339	-13.6231
--					696.013	-0.13534	-0.41012	-0.30751	-0.39704	696.013	14.0205	26.2698	7.36882	-13.7601
--					696.513	-0.13705	-0.40878	-0.30693	-0.39552	696.513	14.0231	26.2757	7.29867	-13.899
--					697.013	-0.13865	-0.40755	-0.30658	-0.394	697.013	14.0247	26.2812	7.23209	-14.039
--					697.513	-0.14029	-0.40647	-0.3064	-0.39248	697.513	14.0255	26.2859	7.16055	-14.1807
--					698.013	-0.14187	-0.40543	-0.30642	-0.39093	698.013	14.0257	26.2904	7.08873	-14.3269
--					698.513	-0.14337	-0.40458	-0.30662	-0.38956	698.513	14.0253	26.2941	7.01662	-14.4566
--					699.013	-0.14513	-0.40381	-0.307	-0.38808	699.013	14.0245	26.2973	6.94515	-14.5962
--					699.513	-0.14671	-0.40315	-0.30758	-0.38662	699.513	14.0235	26.2998	6.8689	-14.7348
--					700.013	-0.14846	-0.40263	-0.30829	-0.38516	700.013	14.0223	26.3016	6.79767	-14.8725
--					700.513	-0.1502	-0.4022	-0.30919	-0.38368	700.513	14.0211	26.3028	6.72235	-15.0124
--					701.013	-0.15187	-0.40186	-0.31027	-0.38224	701.013	14.0198	26.3032	6.64492	-15.1474
--					701.513	-0.15367	-0.4016	-0.31148	-0.38072	701.513	14.0184	26.303	6.56932	-15.2906
--					702.013	-0.15532	-0.40141	-0.31284	-0.37931	702.013	14.017	26.3022	6.49322	-15.422
--					702.513	-0.15696	-0.40128	-0.31425	-0.37795	702.513	14.0153	26.3007	6.42072	-15.5501
--					703.013	-0.15851	-0.4012	-0.31576	-0.37643	703.013	14.0134	26.2986	6.34965	-15.6927
--					703.513	-0.15981	-0.40115	-0.31732	-0.37504	703.513	14.0113	26.2957	6.28077	-15.8244
--					704.013	-0.16086	-0.40112	-0.31904	-0.37362	704.013	14.0089	26.2923	6.20897	-15.9591
--					704.513	-0.16177	-0.4011	-0.32072	-0.37219	704.513	14.0061	26.2882	6.14253	-16.0966
--					705.013	-0.16248	-0.40109	-0.32236	-0.37086	705.013	14.0026	26.2834	6.08003	-16.2268
--					705.513	-0.16297	-0.40106	-0.32399	-0.36947	705.513	13.9988	26.2775	6.01934	-16.3649
--					706.013	-0.16323	-0.40102	-0.32562	-0.36817	706.013	13.9949	26.2713	5.95976	-16.4976
--					706.513	-0.16335	-0.40095	-0.32716	-0.36683	706.513	13.9901	26.2647	5.90291	-16.6375
--					707.013	-0.16333	-0.40086	-0.32866	-0.36554	707.013	13.9848	26.2574	5.84632	-16.7784
--					707.513	-0.16321	-0.40073	-0.32991	-0.3643	707.513	13.9795	26.2496	5.79658	-16.9177
--					708.013	-0.16299	-0.40056	-0.33111	-0.3632	708.013	13.973	26.2408	5.74615	-17.0487
--					708.513	-0.16275	-0.40034	-0.33216	-0.36203	708.513	13.9664	26.2311	5.69668	-17.1937
--					709.013	-0.16247	-0.4001	-0.33305	-0.36093	709.013	13.9592	26.2211	5.64854	-17.3401
--					709.513	-0.16217	-0.39979	-0.3338	-0.35995	709.513	13.9518	26.2095	5.59849	-17.4797
--					710.013	-0.16183	-0.39944	-0.33432	-0.35898	710.013	13.9439	26.1973	5.5516	-17.6291
--					710.513	-0.16139	-0.39907	-0.33468	-0.35811	710.513	13.935	26.1847	5.50109	-17.7753
--					711.013	-0.16087	-0.39861	-0.33483	-0.35732	711.013	13.9261	26.1698	5.4542	-17.9213
--					711.513	-0.16006	-0.39815	-0.33478	-0.35662	711.513	13.9151	26.1548	5.40577	-18.0663
--					712.013	-0.1591	-0.39765	-0.33454	-0.35602	712.013	13.9044	26.1386	5.35623	-18.2035
--					712.513	-0.15793	-0.39707	-0.33412	-0.35551	712.513	13.8935	26.1195	5.30737	-18.3385
--					713.013	-0.1562	-0.39642	-0.33351	-0.35503	713.013	13.8798	26.0981	5.25674	-18.4856
--					713.513	-0.15432	-0.39585	-0.33273	-0.35463	713.513	13.8667	26.0784	5.2049	-18.6291
--					714.013	-0.15237	-0.39521	-0.33184	-0.3543	714.013	13.8542	26.0559	5.15478	-18.7698
--					714.513	-0.1501	-0.39454	-0.33077	-0.35404	714.513	13.8404	26.0315	5.10173	-18.9041
--					715.013	-0.14753	-0.39386	-0.32959	-0.35382	715.013	13.8251	26.0054	5.04878	-19.0442
--					715.513	-0.14496	-0.39319	-0.32843	-0.35363	715.513	13.8094	25.9788	5.00011	-19.187
--					716.013	-0.14286	-0.39247	-0.32715	-0.35348	716.013	13.7957	25.9479	4.9492	-19.3356
--					716.513	-0.14065	-0.39179	-0.3257	-0.35336	716.513	13.7794	25.9176	4.89355	-19.4689
--					717.013	-0.13914	-0.39109	-0.32425	-0.35325	717.013	13.7658	25.8842	4.83964	-19.6098
--					717.513	-0.1379	-0.39047	-0.32287	-0.35315	717.513	13.7501	25.8529	4.78871	-19.7417
--					718.013	-0.13727	-0.38971	-0.32146	-0.35305	718.013	13.7359	25.8122	4.73704	-19.8779
--					718.513	-0.13718	-0.38906	-0.32007	-0.35293	718.513	13.7209	25.7741	4.68598	-20.0116
--					719.013	-0.13756	-0.38841	-0.3187	-0.35279	719.013	13.7077	25.7335	4.63457	-20.1494
--					719.513	-0.1384	-0.38783	-0.31733	-0.35263	719.513	13.6934	25.6948	4.58161	-20.2815
--					720.013	-0.13957	-0.38723	-0.31614	-0.35244	720.013	13.6793	25.6523	4.53439	-20.4132
--					720.513	-0.14083	-0.38665	-0.31487	-0.35221	720.513	13.666	25.6077	4.48211	-20.5448
--					721.013	-0.14212	-0.38608	-0.31371	-0.35194	721.013	13.6524	25.5605	4.43178	-20.6811
--					721.513	-0.14334	-0.38554	-0.31268	-0.35163	721.513	13.6377	25.5134	4.38468	-20.8133
--					722.013	-0.14409	-0.385	-0.3117	-0.35129	722.013	13.6256	25.4632	4.33713	-20.9454
--					722.513	-0.1446	-0.38453	-0.31075	-0.3509	722.513	13.6098	25.4166	4.28825	-21.0846
--					723.013	-0.1446	-0.38404	-0.30991	-0.35051	723.013	13.5962	25.3664	4.24204	-21.2101
--					723.513	-0.14414	-0.38356	-0.30918	-0.35009	723.513	13.5814	25.3158	4.19845	-21.3371
--					724.013	-0.14317	-0.38308	-0.30844	-0.34963	724.013	13.5656	25.2632	4.1518	-21.4721
--					724.513	-0.14185	-0.38263	-0.30778	-0.34917	724.513	13.5504	25.2138	4.10705	-21.6014
--					725.013	-0.14013	-0.38212	-0.30719	-0.34871	725.013	13.534	25.1583	4.06498	-21.7282
--					725.513	-0.13812	-0.38169	-0.30662	-0.34825	725.513	13.517	25.1124	4.02088	-21.8538
--					726.013	-0.13583	-0.38112	-0.30608	-0.34782	726.013	13.4987	25.0538	3.97681	-21.9735
--					726.513	-0.13329	-0.38063	-0.30559	-0.34737	726.513	13.4788	25.0057	3.93524	-22.102
--					727.013	-0.13096	-0.38006	-0.30511	-0.34694	727.013	13.4602	24.9532	3.89203	-22.2298
--					727.513	-0.12848	-0.37948	-0.30469	-0.34657	727.513	13.4396	24.9027	3.85343	-22.3478
--					728.013	-0.12606	-0.37884	-0.30427	-0.3462	728.013	13.4181	24.8515	3.8133	-22.474
--					728.513	-0.12379	-0.37819	-0.30388	-0.34587	728.513	13.3962	24.8024	3.77513	-22.5926
--					729.013	-0.1218	-0.37748	-0.30351	-0.34559	729.013	13.3746	24.7534	3.73803	-22.7081
--					729.513	-0.1198	-0.37672	-0.30316	-0.34532	729.513	13.3492	24.7048	3.70208	-22.8331
--					730.013	-0.11834	-0.37598	-0.30286	-0.3451	730.013	13.3261	24.6615	3.67053	-22.9493
--					730.513	-0.11722	-0.3751	-0.30253	-0.3449	730.513	13.3015	24.6133	3.63477	-23.0648
--					731.013	-0.1166	-0.37418	-0.30227	-0.34473	731.013	13.2782	24.5672	3.60451	-23.1817
--					731.513	-0.11647	-0.37326	-0.30205	-0.34458	731.513	13.2536	24.5245	3.57629	-23.2925
--					732.013	-0.11685	-0.3723	-0.30185	-0.34445	732.013	13.2309	24.4828	3.54867	-23.395
--					732.513	-0.11776	-0.37125	-0.30171	-0.34431	732.513	13.2077	24.4404	3.52337	-23.5104
--					733.013	-0.11926	-0.37022	-0.3016	-0.34416	733.013	13.1836	24.4013	3.49812	-23.6229
--					733.513	-0.12119	-0.36903	-0.30155	-0.344	733.513	13.1606	24.3591	3.47455	-23.7337
--					734.013	-0.12336	-0.36778	-0.30155	-0.3438	734.013	13.1392	24.3178	3.45125	-23.8459
--					734.513	-0.12588	-0.36654	-0.30161	-0.34359	734.513	13.1171	24.2791	3.42747	-23.9493
--					735.013	-0.12835	-0.36524	-0.30173	-0.34331	735.013	13.0968	24.2403	3.40337	-24.0575
--					735.513	-0.13108	-0.36394	-0.30193	-0.34296	735.513	13.0745	24.2036	3.37841	-24.1708
--					736.013	-0.13336	-0.36263	-0.30217	-0.34256	736.013	13.0545	24.1684	3.35435	-24.2775
--					736.513	-0.13519	-0.36127	-0.30248	-0.34209	736.513	13.0361	24.1331	3.32907	-24.3802
--					737.013	-0.13663	-0.35988	-0.30285	-0.34155	737.013	13.0177	24.0984	3.30117	-24.4828
--					737.513	-0.13758	-0.35839	-0.30329	-0.34093	737.513	12.9985	24.0626	3.27163	-24.5843
--					738.013	-0.13785	-0.35702	-0.30378	-0.34019	738.013	12.9806	24.0302	3.24026	-24.6913
--					738.513	-0.13744	-0.35542	-0.30431	-0.33937	738.513	12.9625	23.9936	3.20778	-24.7943
--					739.013	-0.13642	-0.35375	-0.30491	-0.33849	739.013	12.946	23.956	3.17207	-24.8934
--					739.513	-0.13463	-0.3524	-0.30554	-0.33745	739.513	12.9283	23.9259	3.13448	-24.9987
--					740.013	-0.13233	-0.35093	-0.30627	-0.3364	740.013	12.9116	23.8935	3.09164	-25.097
--					740.513	-0.1297	-0.34952	-0.30702	-0.33519	740.513	12.896	23.8622	3.04778	-25.2004
--					741.013	-0.12626	-0.34809	-0.30775	-0.33393	741.013	12.8782	23.8304	3.00516	-25.3012
--					741.513	-0.12274	-0.3467	-0.30853	-0.33262	741.513	12.8615	23.799	2.95873	-25.4002
--					742.013	-0.11935	-0.34533	-0.30934	-0.33115	742.013	12.8459	23.7671	2.91101	-25.5048
--					742.513	-0.11589	-0.34397	-0.31011	-0.32953	742.513	12.8296	23.7347	2.86473	-25.6143
--					743.013	-0.1128	-0.34272	-0.31083	-0.32804	743.013	12.8139	23.7035	2.82149	-25.7116
--					743.513	-0.11013	-0.34159	-0.3116	-0.32632	743.513	12.7983	23.6734	2.77484	-25.8204
--					744.013	-0.1081	-0.34057	-0.31229	-0.32472	744.013	12.7836	23.6448	2.73136	-25.9194
--					744.513	-0.10653	-0.33967	-0.31296	-0.32307	744.513	12.7671	23.6173	2.68886	-26.0198
--					745.013	-0.10585	-0.33878	-0.31351	-0.3214	745.013	12.7519	23.5875	2.65207	-26.1211
--					745.513	-0.10596	-0.33799	-0.31404	-0.3197	745.513	12.7377	23.5576	2.61519	-26.2246
--					746.013	-0.10685	-0.33737	-0.31445	-0.31796	746.013	12.7229	23.531	2.58313	-26.3312
--					746.513	-0.10843	-0.33684	-0.31478	-0.3164	746.513	12.7089	23.504	2.55365	-26.428
--					747.013	-0.11054	-0.33642	-0.31502	-0.31474	747.013	12.6957	23.4774	2.52618	-26.5345
--					747.513	-0.11331	-0.33607	-0.31514	-0.31332	747.513	12.6818	23.4495	2.50274	-26.6288
--					748.013	-0.11639	-0.33585	-0.31514	-0.31188	748.013	12.6685	23.4245	2.48073	-26.728
--					748.513	-0.11954	-0.3357	-0.31502	-0.31048	748.513	12.6558	23.3978	2.46233	-26.8298
--					749.013	-0.12245	-0.33564	-0.31477	-0.30918	749.013	12.6444	23.376	2.44587	-26.9303
--					749.513	-0.12554	-0.33564	-0.31435	-0.30793	749.513	12.6318	23.352	2.43034	-27.0343
--					750.013	-0.12796	-0.33569	-0.31381	-0.30686	750.013	12.6209	23.3295	2.417	-27.1306
--					750.513	-0.13005	-0.33578	-0.31311	-0.30583	750.513	12.61	23.3059	2.40471	-27.2337
--					751.013	-0.13171	-0.3359	-0.31222	-0.30497	751.013	12.5992	23.2811	2.39304	-27.3282
--					751.513	-0.1329	-0.33604	-0.31113	-0.30415	751.513	12.5885	23.2568	2.3818	-27.4313
--					752.013	-0.13363	-0.33618	-0.3099	-0.30344	752.013	12.5781	23.2336	2.37146	-27.5331
--					752.513	-0.13394	-0.33628	-0.30856	-0.30283	752.513	12.5686	23.212	2.36182	-27.638
--					753.013	-0.134	-0.33636	-0.30695	-0.30232	753.013	12.5596	23.1899	2.35185	-27.7419
--					753.513	-0.13387	-0.33639	-0.30529	-0.30195	753.513	12.5499	23.1698	2.34265	-27.8383
--					754.013	-0.13365	-0.33637	-0.30346	-0.30165	754.013	12.5407	23.1485	2.33353	-27.9367
--					754.513	-0.13342	-0.33627	-0.30156	-0.30142	754.513	12.532	23.1281	2.32484	-28.0338
--					755.013	-0.13321	-0.33609	-0.29948	-0.30126	755.013	12.5228	23.1065	2.31597	-28.1365
--					755.513	-0.13307	-0.33582	-0.29736	-0.30116	755.513	12.5152	23.0859	2.30754	-28.2225
--					756.013	-0.13295	-0.33543	-0.29498	-0.30109	756.013	12.5061	23.0648	2.29847	-28.3144
--					756.513	-0.13285	-0.33495	-0.29275	-0.30105	756.513	12.4978	23.0449	2.29023	-28.411
--					757.013	-0.13273	-0.33435	-0.29028	-0.30102	757.013	12.4894	23.0249	2.28117	-28.5028
--					757.513	-0.13249	-0.33364	-0.28777	-0.30099	757.513	12.4803	23.0052	2.27184	-28.5884
--					758.013	-0.1321	-0.33281	-0.28532	-0.30094	758.013	12.4716	22.9857	2.26243	-28.682
--					758.513	-0.13154	-0.33185	-0.28282	-0.30087	758.513	12.4632	22.966	2.25235	-28.7673
--					759.013	-0.13077	-0.33087	-0.28046	-0.30076	759.013	12.455	22.9484	2.24215	-28.857
--					759.513	-0.12985	-0.32975	-0.27801	-0.30059	759.513	12.4474	22.9302	2.23061	-28.9462
--					760.013	-0.12851	-0.32862	-0.2755	-0.30037	760.013	12.4388	22.9136	2.21749	-29.033
--					760.513	-0.12693	-0.32735	-0.27313	-0.30007	760.513	12.4304	22.8963	2.2035	-29.1204
--					761.013	-0.1252	-0.32596	-0.27084	-0.29971	761.013	12.4227	22.8788	2.18804	-29.2057
--					761.513	-0.12314	-0.32463	-0.2687	-0.29923	761.513	12.4148	22.863	2.17138	-29.295
--					762.013	-0.12099	-0.32336	-0.2668	-0.2987	762.013	12.4076	22.8486	2.15409	-29.3792
--					762.513	-0.11859	-0.32194	-0.26494	-0.29802	762.513	12.4004	22.8331	2.13427	-29.4697
--					763.013	-0.11626	-0.32063	-0.26338	-0.29725	763.013	12.394	22.8193	2.11462	-29.559
--					763.513	-0.11374	-0.31935	-0.26193	-0.29644	763.513	12.3876	22.8059	2.09249	-29.6429
--					764.013	-0.11104	-0.31813	-0.2606	-0.29549	764.013	12.3812	22.7933	2.06754	-29.7318
--					764.513	-0.10853	-0.31685	-0.25953	-0.29451	764.513	12.3754	22.7799	2.04211	-29.8156
--					765.013	-0.1062	-0.31576	-0.25866	-0.29339	765.013	12.3702	22.7682	2.01513	-29.9045
--					765.513	-0.10398	-0.31481	-0.25806	-0.29223	765.513	12.3651	22.7574	1.98995	-29.9918
--					766.013	-0.10198	-0.3139	-0.25759	-0.29111	766.013	12.3604	22.7463	1.96114	-30.0718
--					766.513	-0.10023	-0.31319	-0.25732	-0.28983	766.513	12.3559	22.7365	1.93193	-30.1599
--					767.013	-0.09874	-0.31259	-0.25725	-0.28861	767.013	12.3517	22.7268	1.90253	-30.2417
--					767.513	-0.09758	-0.31215	-0.25736	-0.28735	767.513	12.348	22.7175	1.8741	-30.3243
--					768.013	-0.09654	-0.31189	-0.25763	-0.28608	768.013	12.3442	22.7091	1.84588	-30.4076
--					768.513	-0.09572	-0.31179	-0.25805	-0.28478	768.513	12.3407	22.7008	1.81853	-30.4925
--					769.013	-0.095	-0.31187	-0.25862	-0.2836	769.013	12.3373	22.693	1.7923	-30.5712
--					769.513	-0.09427	-0.31209	-0.25931	-0.28235	769.513	12.3338	22.6861	1.768	-30.6565
--					770.013	-0.09362	-0.31251	-0.26006	-0.28121	770.013	12.3308	22.6788	1.74665	-30.7372
--					770.513	-0.09283	-0.31304	-0.26097	-0.28004	770.513	12.3274	22.6723	1.72613	-30.8239
--					771.013	-0.09213	-0.31375	-0.26186	-0.27906	771.013	12.3246	22.6656	1.70966	-30.9014
--					771.513	-0.09123	-0.31452	-0.26282	-0.27809	771.513	12.3212	22.6597	1.69536	-30.9844
--					772.013	-0.09044	-0.31545	-0.26371	-0.27727	772.013	12.3184	22.6534	1.68466	-31.0614
--					772.513	-0.08962	-0.31642	-0.26467	-0.27651	772.513	12.3153	22.6476	1.67562	-31.1421
--					773.013	-0.08887	-0.31744	-0.26554	-0.2759	773.013	12.3122	22.6417	1.66925	-31.2175
--					773.513	-0.0883	-0.31844	-0.26633	-0.27537	773.513	12.3092	22.6362	1.6649	-31.2945
--					774.013	-0.08793	-0.31942	-0.26701	-0.27498	774.013	12.3063	22.6307	1.6621	-31.3666
--					774.513	-0.0878	-0.32046	-0.26763	-0.27469	774.513	12.3034	22.6246	1.66018	-31.4396
--					775.013	-0.08795	-0.32134	-0.26802	-0.27449	775.013	12.3006	22.619	1.65899	-31.5163
--					775.513	-0.08837	-0.32206	-0.26827	-0.2744	775.513	12.298	22.6136	1.65754	-31.5879
--					776.013	-0.08904	-0.32267	-0.26829	-0.2744	776.013	12.2955	22.6078	1.65576	-31.6571
--					776.513	-0.08991	-0.32307	-0.26806	-0.27449	776.513	12.2932	22.6023	1.65255	-31.7279
--					777.013	-0.09109	-0.32328	-0.2676	-0.27465	777.013	12.2906	22.5966	1.64797	-31.7995
--					777.513	-0.09245	-0.32323	-0.26689	-0.27488	777.513	12.288	22.5906	1.64177	-31.8705
--					778.013	-0.09384	-0.32291	-0.26594	-0.27518	778.013	12.2855	22.5847	1.6337	-31.9446
--					778.513	-0.09549	-0.32234	-0.26458	-0.2755	778.513	12.2825	22.5792	1.6225	-32.014
--					779.013	-0.09689	-0.32137	-0.26306	-0.27586	779.013	12.2797	22.5729	1.6102	-32.0842
--					779.513	-0.09819	-0.3201	-0.26125	-0.27622	779.513	12.2767	22.5669	1.59582	-32.1521
--					780.013	-0.09937	-0.31854	-0.25911	-0.27661	780.013	12.2733	22.561	1.5793	-32.2231
--					780.513	-0.10039	-0.31661	-0.25671	-0.27698	780.513	12.269	22.555	1.56139	-32.2919
--					781.013	-0.10107	-0.31435	-0.25407	-0.27734	781.013	12.2641	22.5489	1.5425	-32.3602
--					781.513	-0.10136	-0.31183	-0.2512	-0.27768	781.513	12.2588	22.5431	1.52286	-32.4283
--					782.013	-0.10131	-0.30904	-0.24809	-0.27799	782.013	12.2531	22.5373	1.50272	-32.4954
--					782.513	-0.10094	-0.30588	-0.24467	-0.27828	782.513	12.2461	22.5313	1.48188	-32.564
--					783.013	-0.1003	-0.30271	-0.24123	-0.27852	783.013	12.2382	22.5258	1.46215	-32.6278
--					783.513	-0.09951	-0.29916	-0.23763	-0.27875	783.513	12.2297	22.5201	1.44272	-32.6952
--					784.013	-0.09867	-0.29559	-0.2339	-0.27894	784.013	12.2204	22.5147	1.42374	-32.7602
--					784.513	-0.09782	-0.29177	-0.23035	-0.27912	784.513	12.2094	22.5092	1.40665	-32.8293
--					785.013	-0.0972	-0.28785	-0.22662	-0.27927	785.013	12.1991	22.5038	1.38949	-32.8963
--					785.513	-0.09675	-0.2841	-0.22281	-0.27941	785.513	12.1874	22.4988	1.3726	-32.9654
--					786.013	-0.09657	-0.27995	-0.21928	-0.27955	786.013	12.1756	22.4934	1.35735	-33.0353
--					786.513	-0.09665	-0.27621	-0.21562	-0.27968	786.513	12.1642	22.4886	1.34167	-33.1024
--					787.013	-0.09694	-0.27235	-0.21213	-0.27982	787.013	12.1533	22.4836	1.32664	-33.1665
--					787.513	-0.09732	-0.26889	-0.20879	-0.27997	787.513	12.1441	22.4792	1.31198	-33.2311
--					788.013	-0.09775	-0.26557	-0.20551	-0.28015	788.013	12.1351	22.4748	1.29709	-33.2949
--					788.513	-0.09803	-0.26232	-0.20248	-0.28035	788.513	12.1286	22.4705	1.28268	-33.3577
--					789.013	-0.09811	-0.2592	-0.19965	-0.28061	789.013	12.1231	22.4661	1.26856	-33.4207
--					789.513	-0.09792	-0.25627	-0.19705	-0.28091	789.513	12.1199	22.4617	1.25474	-33.4835
--					790.013	-0.09706	-0.25385	-0.19458	-0.28127	790.013	12.1171	22.4578	1.24083	-33.5471
--					790.513	-0.09604	-0.25158	-0.19248	-0.28169	790.513	12.1161	22.4538	1.22822	-33.6094
--					791.013	-0.0945	-0.24989	-0.19046	-0.28212	791.013	12.1155	22.4503	1.2152	-33.6656
--					791.513	-0.09254	-0.24842	-0.18868	-0.28261	791.513	12.1145	22.4469	1.20289	-33.7238
--					792.013	-0.09024	-0.24724	-0.18706	-0.28316	792.013	12.1122	22.4435	1.19083	-33.7822
--					792.513	-0.08767	-0.24634	-0.18576	-0.28369	792.513	12.1074	22.4401	1.18034	-33.8356
--					793.013	-0.08501	-0.24572	-0.18462	-0.28426	793.013	12.0991	22.4365	1.17047	-33.8894
--					793.513	-0.08232	-0.24543	-0.18367	-0.28483	793.513	12.0859	22.4331	1.16151	-33.943
--					794.013	-0.07981	-0.24542	-0.18288	-0.28539	794.013	12.0674	22.4298	1.15339	-33.995
--					794.513	-0.07761	-0.24569	-0.18226	-0.28594	794.513	12.044	22.4263	1.14641	-34.0473
--					795.013	-0.07561	-0.24618	-0.18177	-0.28647	795.013	12.0128	22.4231	1.14004	-34.1011
--					795.513	-0.07391	-0.24693	-0.18143	-0.28696	795.513	11.9731	22.4195	1.13508	-34.1577
--					796.013	-0.07264	-0.24785	-0.18119	-0.28735	796.013	11.9262	22.416	1.13074	-34.2124
--					796.513	-0.07186	-0.24886	-0.18104	-0.28764	796.513	11.8765	22.4126	1.12729	-34.2676
--					797.013	-0.07144	-0.25004	-0.18098	-0.28778	797.013	11.8147	22.409	1.12484	-34.3205
--					797.513	-0.07142	-0.25128	-0.18098	-0.28778	797.513	11.754	22.4054	1.12332	-34.3765
--					798.013	-0.0717	-0.25267	-0.18102	-0.28759	798.013	11.6903	22.4014	1.12239	-34.4315
--					798.513	-0.07216	-0.25408	-0.18107	-0.28721	798.513	11.6288	22.3973	1.12205	-34.4856
--					799.013	-0.07265	-0.25562	-0.18113	-0.28662	799.013	11.5743	22.3927	1.12207	-34.5393
--					799.513	-0.07306	-0.25718	-0.18117	-0.28576	799.513	11.5266	22.3878	1.12224	-34.5958
--					800.013	-0.07334	-0.25866	-0.18118	-0.28466	800.013	11.4775	22.3827	1.12236	-34.6513
--					800.513	-0.07324	-0.26003	-0.18113	-0.28327	800.513	11.4477	22.3774	1.12217	-34.7069
--					801.013	-0.07276	-0.26136	-0.18102	-0.28159	801.013	11.4299	22.3718	1.12154	-34.7631
--					801.513	-0.07181	-0.26266	-0.18082	-0.27977	801.513	11.4256	22.3655	1.12017	-34.8153
--					802.013	-0.07037	-0.26382	-0.18052	-0.27758	802.013	11.4358	22.359	1.11784	-34.8703
--					802.513	-0.06856	-0.26481	-0.18013	-0.27511	802.513	11.4594	22.3522	1.1147	-34.925
--					803.013	-0.06622	-0.26565	-0.1796	-0.2725	803.013	11.4996	22.3453	1.11027	-34.9771
--					803.513	-0.06398	-0.26641	-0.17892	-0.26943	803.513	11.5456	22.3373	1.10475	-35.0331
--					804.013	-0.06142	-0.26698	-0.17806	-0.26641	804.013	11.6064	22.3293	1.0978	-35.084
--					804.513	-0.05913	-0.2674	-0.17712	-0.26299	804.513	11.6703	22.3209	1.09054	-35.1377
--					805.013	-0.05682	-0.26767	-0.17602	-0.25926	805.013	11.749	22.3119	1.08263	-35.1927
--					805.513	-0.05547	-0.26779	-0.17467	-0.25524	805.513	11.8082	22.3023	1.07356	-35.2488
--					806.013	-0.05438	-0.26776	-0.1733	-0.25104	806.013	11.8771	22.2918	1.06513	-35.3047
--					806.513	-0.05391	-0.26759	-0.17167	-0.24657	806.513	11.9447	22.2815	1.05614	-35.3619
--					807.013	-0.05408	-0.26728	-0.1701	-0.24217	807.013	11.9979	22.2707	1.0484	-35.4164
--					807.513	-0.05484	-0.26685	-0.16821	-0.23763	807.513	12.0482	22.2593	1.04018	-35.4715
--					808.013	-0.05602	-0.26628	-0.1662	-0.23313	808.013	12.0876	22.2473	1.03254	-35.5251
--					808.513	-0.05785	-0.26562	-0.16418	-0.22837	808.513	12.1242	22.2351	1.02576	-35.5812
--					809.013	-0.05992	-0.26481	-0.16185	-0.22341	809.013	12.1506	22.2217	1.01881	-35.6393
--					809.513	-0.06212	-0.26392	-0.15957	-0.21845	809.513	12.1692	22.2082	1.01258	-35.6975
--					810.013	-0.06474	-0.26305	-0.15721	-0.21382	810.013	12.1831	22.1957	1.00649	-35.7524
--					810.513	-0.06732	-0.26207	-0.15473	-0.20907	810.513	12.1911	22.1822	1.00022	-35.8092
--					811.013	-0.06969	-0.261	-0.15212	-0.20444	811.013	12.1947	22.1679	0.99339	-35.8659
--					811.513	-0.07227	-0.25989	-0.14966	-0.19973	811.513	12.1952	22.1536	0.98657	-35.9249
--					812.013	-0.0746	-0.25878	-0.14696	-0.19527	812.013	12.1933	22.1395	0.97843	-35.9827
--					812.513	-0.07666	-0.25758	-0.1445	-0.19136	812.513	12.1898	22.1245	0.97028	-36.0354
--					813.013	-0.07844	-0.25641	-0.14183	-0.18719	813.013	12.1852	22.1102	0.96057	-36.094
--					813.513	-0.07976	-0.25522	-0.13912	-0.18342	813.513	12.1806	22.0957	0.94984	-36.1499
--					814.013	-0.08082	-0.25408	-0.13657	-0.18023	814.013	12.175	22.0822	0.93899	-36.2001
--					814.513	-0.08135	-0.25292	-0.13395	-0.17701	814.513	12.1695	22.0685	0.92716	-36.254
--					815.013	-0.0813	-0.25171	-0.13153	-0.17416	815.013	12.1638	22.0544	0.91587	-36.3054
--					815.513	-0.08073	-0.25047	-0.12896	-0.17165	815.513	12.1588	22.0404	0.90368	-36.3544
--					816.013	-0.07953	-0.24923	-0.12629	-0.16927	816.013	12.1535	22.0267	0.89126	-36.4051
--					816.513	-0.07776	-0.24806	-0.12397	-0.16726	816.513	12.1481	22.014	0.88094	-36.4523
--					817.013	-0.07549	-0.24676	-0.12147	-0.16524	817.013	12.1428	22.0004	0.8709	-36.5058
--					817.513	-0.07278	-0.24555	-0.11924	-0.16365	817.513	12.1373	21.9883	0.86327	-36.554
--					818.013	-0.06959	-0.24435	-0.11687	-0.16228	818.013	12.1313	21.9767	0.8571	-36.6022
--					818.513	-0.06646	-0.24312	-0.11483	-0.16111	818.513	12.1255	21.9653	0.85394	-36.6508
--					819.013	-0.06351	-0.24194	-0.11297	-0.16016	819.013	12.1198	21.9548	0.85318	-36.6996
--					819.513	-0.06034	-0.24066	-0.11133	-0.15948	819.513	12.113	21.9439	0.85454	-36.7438
--					820.013	-0.05739	-0.23937	-0.10966	-0.15897	820.013	12.1057	21.9335	0.85825	-36.7879
--					820.513	-0.05481	-0.23794	-0.10824	-0.1586	820.513	12.0977	21.9225	0.86357	-36.8352
--					821.013	-0.05295	-0.23649	-0.10679	-0.1584	821.013	12.0897	21.9119	0.87138	-36.8789
--					821.513	-0.05167	-0.2352	-0.1056	-0.15834	821.513	12.081	21.9029	0.87998	-36.9251
--					822.013	-0.05103	-0.23384	-0.10443	-0.15841	822.013	12.0715	21.8938	0.89047	-36.9704
--					822.513	-0.05109	-0.23257	-0.10343	-0.15859	822.513	12.061	21.8855	0.90138	-37.0147
--					823.013	-0.05189	-0.23135	-0.10256	-0.15885	823.013	12.0491	21.8778	0.91249	-37.0571
--					823.513	-0.0534	-0.23002	-0.10181	-0.15918	823.513	12.0359	21.8696	0.92344	-37.1002
--					824.013	-0.0552	-0.22877	-0.10121	-0.15956	824.013	12.0236	21.8619	0.93294	-37.1425
--					824.513	-0.05773	-0.22745	-0.10076	-0.15999	824.513	12.0082	21.8539	0.94073	-37.1849
--					825.013	-0.06052	-0.22618	-0.10039	-0.16049	825.013	11.9922	21.8461	0.94725	-37.2298
--					825.513	-0.06346	-0.22495	-0.10009	-0.16102	825.513	11.9753	21.8384	0.95239	-37.2754
--					826.013	-0.06629	-0.2239	-0.09988	-0.16157	826.013	11.9585	21.8317	0.95556	-37.3218
--					826.513	-0.06883	-0.22281	-0.09973	-0.16213	826.513	11.9424	21.8244	0.95665	-37.368
--					827.013	-0.07128	-0.22183	-0.09966	-0.16277	827.013	11.9254	21.8176	0.95548	-37.4195
--					827.513	-0.07329	-0.22086	-0.09964	-0.16336	827.513	11.9093	21.8103	0.95209	-37.4684
--					828.013	-0.0746	-0.21996	-0.09968	-0.16395	828.013	11.8965	21.8029	0.94639	-37.5175
--					828.513	-0.0754	-0.21916	-0.09975	-0.16454	828.513	11.8854	21.7956	0.93856	-37.5677
--					829.013	-0.07555	-0.21849	-0.09986	-0.16514	829.013	11.8782	21.7889	0.92911	-37.6193
--					829.513	-0.07513	-0.21785	-0.09998	-0.16569	829.513	11.8747	21.7817	0.91834	-37.6687
--					830.013	-0.07431	-0.21729	-0.1001	-0.16627	830.013	11.8748	21.7745	0.90622	-37.7218
--					830.513	-0.07288	-0.21681	-0.10022	-0.16679	830.513	11.879	21.7673	0.89338	-37.7705
--					831.013	-0.07089	-0.21639	-0.10034	-0.16736	831.013	11.8883	21.7599	0.87902	-37.8265
--					831.513	-0.06888	-0.21604	-0.10044	-0.16789	831.513	11.9004	21.7525	0.86385	-37.8803
--					832.013	-0.06719	-0.21574	-0.10051	-0.16839	832.013	11.912	21.745	0.84831	-37.934
--					832.513	-0.06509	-0.21551	-0.10056	-0.16887	832.513	11.9284	21.7381	0.83301	-37.9875
--					833.013	-0.06326	-0.21529	-0.10059	-0.16928	833.013	11.9449	21.7308	0.81619	-38.0378
--					833.513	-0.06177	-0.21511	-0.10058	-0.16965	833.513	11.9603	21.7241	0.79982	-38.0878
--					834.013	-0.06056	-0.21493	-0.10054	-0.16999	834.013	11.9752	21.717	0.78294	-38.139
--					834.513	-0.05988	-0.21472	-0.10047	-0.17027	834.513	11.9864	21.7095	0.76647	-38.1876
--					835.013	-0.0596	-0.21451	-0.10037	-0.17048	835.013	11.9943	21.7024	0.7501	-38.2362
--					835.513	-0.05969	-0.21427	-0.10022	-0.17061	835.513	11.9992	21.6956	0.73311	-38.2841
--					836.013	-0.06015	-0.21399	-0.10004	-0.17067	836.013	12.0006	21.6889	0.71777	-38.3313
--					836.513	-0.06084	-0.21365	-0.09984	-0.17063	836.513	11.9985	21.6822	0.70484	-38.374
--					837.013	-0.06173	-0.21322	-0.09959	-0.17048	837.013	11.993	21.6754	0.69359	-38.4182
--					837.513	-0.06265	-0.21271	-0.09934	-0.17022	837.513	11.9852	21.6686	0.68549	-38.4628
--					838.013	-0.0636	-0.21211	-0.09902	-0.16982	838.013	11.9752	21.6621	0.67959	-38.5072
--					838.513	-0.06445	-0.21148	-0.09873	-0.16928	838.513	11.9641	21.6562	0.67729	-38.5504
--					839.013	-0.06514	-0.21064	-0.09837	-0.16864	839.013	11.9534	21.6497	0.67784	-38.5904
--					839.513	-0.06578	-0.20976	-0.09798	-0.16781	839.513	11.9416	21.6437	0.68177	-38.6317
--					840.013	-0.06624	-0.20881	-0.09759	-0.16687	840.013	11.9316	21.638	0.68826	-38.6715
--					840.513	-0.06663	-0.20777	-0.09713	-0.16575	840.513	11.9224	21.6326	0.69819	-38.7115
--					841.013	-0.06693	-0.20659	-0.09664	-0.16453	841.013	11.9154	21.627	0.71033	-38.7499
--					841.513	-0.06714	-0.20537	-0.09613	-0.16304	841.513	11.9109	21.6218	0.72397	-38.7915
--					842.013	-0.0674	-0.20415	-0.09556	-0.16153	842.013	11.9068	21.617	0.73943	-38.8299
--					842.513	-0.06755	-0.20269	-0.09499	-0.15974	842.513	11.9049	21.6117	0.75407	-38.8716
--					843.013	-0.0676	-0.20109	-0.09433	-0.15787	843.013	11.9041	21.6063	0.77002	-38.9121
--					843.513	-0.06749	-0.19967	-0.09363	-0.15585	843.513	11.9038	21.6019	0.78481	-38.9533
--					844.013	-0.0671	-0.19808	-0.09284	-0.15369	844.013	11.9035	21.5972	0.79923	-38.9952
--					844.513	-0.06638	-0.19653	-0.09205	-0.15152	844.513	11.9027	21.5928	0.81114	-39.0356
--					845.013	-0.0652	-0.19487	-0.09115	-0.14912	845.013	11.9009	21.5883	0.82208	-39.0785
--					845.513	-0.0635	-0.19332	-0.09015	-0.1465	845.513	11.8976	21.5844	0.83138	-39.1242
--					846.013	-0.06116	-0.19176	-0.08906	-0.1439	846.013	11.8925	21.5805	0.83893	-39.1683
--					846.513	-0.05829	-0.19023	-0.08795	-0.14133	846.513	11.8856	21.5768	0.84457	-39.2111
--					847.013	-0.05515	-0.18864	-0.08662	-0.13884	847.013	11.8775	21.573	0.84934	-39.2519
--					847.513	-0.05161	-0.18696	-0.08526	-0.13619	847.513	11.8679	21.5692	0.85283	-39.2951
--					848.013	-0.04748	-0.18533	-0.08376	-0.13345	848.013	11.8559	21.5656	0.8557	-39.3392
--					848.513	-0.04358	-0.184	-0.08218	-0.13079	848.513	11.8439	21.5627	0.85826	-39.3819
--					849.013	-0.03975	-0.18291	-0.08047	-0.12791	849.013	11.8313	21.5604	0.86099	-39.4281
--					849.513	-0.03647	-0.18188	-0.07863	-0.12522	849.513	11.8197	21.5582	0.86437	-39.4712
--					850.013	-0.03332	-0.18095	-0.07661	-0.12272	850.013	11.8073	21.5563	0.86888	-39.5117
--					850.513	-0.0309	-0.18006	-0.07465	-0.12016	850.513	11.7964	21.5544	0.87427	-39.5533
--					851.013	-0.02914	-0.1793	-0.07238	-0.11753	851.013	11.7869	21.5529	0.88189	-39.5967
--					851.513	-0.02802	-0.17863	-0.07015	-0.1151	851.513	11.7789	21.5516	0.89083	-39.6376
--					852.013	-0.02745	-0.17811	-0.06768	-0.11254	852.013	11.7724	21.5505	0.90237	-39.6818
--					852.513	-0.02735	-0.17771	-0.06539	-0.11025	852.513	11.7658	21.5497	0.91467	-39.7225
--					853.013	-0.02773	-0.17742	-0.06285	-0.10811	853.013	11.761	21.5491	0.92997	-39.7619
--					853.513	-0.02833	-0.17726	-0.0603	-0.10596	853.513	11.7576	21.5488	0.94713	-39.8034
--					854.013	-0.02915	-0.17719	-0.05757	-0.10411	854.013	11.7546	21.5486	0.96742	-39.8408
--					854.513	-0.03021	-0.17723	-0.05491	-0.10233	854.513	11.7513	21.5485	0.98901	-39.8789
--					855.013	-0.03123	-0.17736	-0.05234	-0.10074	855.013	11.7483	21.5486	1.01178	-39.9154
--					855.513	-0.03231	-0.1776	-0.04967	-0.0992	855.513	11.7447	21.5489	1.03744	-39.9532
--					856.013	-0.03336	-0.17789	-0.04702	-0.09775	856.013	11.7408	21.5492	1.06513	-39.9923
--					856.513	-0.03463	-0.17831	-0.04448	-0.09646	856.513	11.7355	21.5496	1.0939	-40.0305
--					857.013	-0.03575	-0.17872	-0.04201	-0.09537	857.013	11.7304	21.55	1.12425	-40.0666
--					857.513	-0.03737	-0.17922	-0.03942	-0.09434	857.513	11.7228	21.5504	1.15932	-40.1046
--					858.013	-0.03901	-0.17979	-0.03719	-0.09345	858.013	11.7153	21.5509	1.19263	-40.1423
--					858.513	-0.04083	-0.18041	-0.0352	-0.09267	858.513	11.7073	21.5513	1.22571	-40.1807
--					859.013	-0.04306	-0.181	-0.03327	-0.09208	859.013	11.6981	21.5517	1.26156	-40.2146
--					859.513	-0.04557	-0.1816	-0.03137	-0.0915	859.513	11.6887	21.552	1.30189	-40.2541
--					860.013	-0.04802	-0.18221	-0.02971	-0.09106	860.013	11.6803	21.5522	1.34298	-40.2906
--					860.513	-0.05057	-0.18286	-0.02828	-0.09069	860.513	11.6724	21.5523	1.38477	-40.3274
--					861.013	-0.05315	-0.18349	-0.027	-0.09037	861.013	11.6652	21.5522	1.43016	-40.368
--					861.513	-0.05591	-0.18407	-0.02601	-0.09015	861.513	11.6585	21.5521	1.47489	-40.4039
--					862.013	-0.05816	-0.18466	-0.02526	-0.08996	862.013	11.6538	21.5518	1.51908	-40.4407
--					862.513	-0.06035	-0.18521	-0.02467	-0.08981	862.513	11.65	21.5513	1.5686	-40.4785
--					863.013	-0.06231	-0.18574	-0.02436	-0.08969	863.013	11.6474	21.5507	1.61723	-40.5141
--					863.513	-0.06388	-0.18629	-0.02428	-0.08957	863.513	11.646	21.5499	1.66243	-40.5507
--					864.013	-0.06509	-0.18685	-0.02441	-0.08944	864.013	11.6456	21.5488	1.70992	-40.5882
--					864.513	-0.06587	-0.18731	-0.02473	-0.0893	864.513	11.6458	21.5477	1.75294	-40.6252
--					865.013	-0.06639	-0.18775	-0.02532	-0.08912	865.013	11.6464	21.5464	1.80072	-40.6636
--					865.513	-0.06663	-0.18813	-0.02607	-0.08892	865.513	11.6472	21.5451	1.84304	-40.6995
--					866.013	-0.06659	-0.18855	-0.02704	-0.08865	866.013	11.6477	21.5434	1.88333	-40.737
--					866.513	-0.06631	-0.18892	-0.02808	-0.08832	866.513	11.6479	21.5417	1.91744	-40.7742
--					867.013	-0.06587	-0.18926	-0.02937	-0.0879	867.013	11.6475	21.54	1.95019	-40.8128
--					867.513	-0.06523	-0.18964	-0.03062	-0.08739	867.513	11.6464	21.5379	1.975	-40.8514
--					868.013	-0.06447	-0.19003	-0.03214	-0.0868	868.013	11.6447	21.5356	1.99817	-40.8904
--					868.513	-0.06355	-0.19042	-0.03365	-0.08612	868.513	11.6423	21.5331	2.01495	-40.9284
--					869.013	-0.06246	-0.19078	-0.03532	-0.08536	869.013	11.6391	21.5306	2.02738	-40.9665
--					869.513	-0.06122	-0.19114	-0.03689	-0.08449	869.513	11.6352	21.528	2.03404	-41.0055
--					870.013	-0.0599	-0.19149	-0.03838	-0.08349	870.013	11.6311	21.5253	2.03633	-41.0455
--					870.513	-0.0581	-0.19184	-0.03989	-0.08237	870.513	11.6255	21.5225	2.03504	-41.087
--					871.013	-0.0565	-0.1922	-0.04132	-0.08122	871.013	11.6206	21.5194	2.03075	-41.1261
--					871.513	-0.05466	-0.19254	-0.04272	-0.08	871.513	11.6152	21.5163	2.02402	-41.1649
--					872.013	-0.05265	-0.19283	-0.04387	-0.07856	872.013	11.6095	21.5133	2.01684	-41.2077
--					872.513	-0.05051	-0.19311	-0.04514	-0.07702	872.513	11.6038	21.5101	2.00758	-41.2513
--					873.013	-0.04863	-0.19334	-0.04617	-0.07539	873.013	11.5992	21.507	1.99949	-41.2952
--					873.513	-0.04652	-0.19354	-0.04701	-0.07362	873.513	11.5946	21.5037	1.99328	-41.3408
--					874.013	-0.04434	-0.19368	-0.04768	-0.07182	874.013	11.5908	21.5006	1.98961	-41.3857
--					874.513	-0.04244	-0.19376	-0.04818	-0.07002	874.513	11.5884	21.4974	1.98945	-41.4295
--					875.013	-0.04058	-0.19378	-0.04847	-0.06814	875.013	11.587	21.494	1.99396	-41.4743
--					875.513	-0.03878	-0.19372	-0.04854	-0.06628	875.513	11.5869	21.4907	2.00347	-41.5178
--					876.013	-0.03715	-0.19358	-0.04839	-0.06433	876.013	11.588	21.4873	2.01962	-41.5632
--					876.513	-0.03509	-0.19333	-0.04802	-0.06236	876.513	11.591	21.4838	2.04207	-41.6091
--					877.013	-0.03353	-0.193	-0.04747	-0.06044	877.013	11.5946	21.4806	2.06935	-41.6542
--					877.513	-0.03218	-0.19255	-0.04667	-0.05863	877.513	11.5986	21.4772	2.10588	-41.6973
--					878.013	-0.03057	-0.19203	-0.04563	-0.05684	878.013	11.6043	21.4739	2.1508	-41.7411
--					878.513	-0.02929	-0.19141	-0.04449	-0.0551	878.513	11.6095	21.4706	2.19943	-41.785
--					879.013	-0.02812	-0.19065	-0.04305	-0.05338	879.013	11.6149	21.4672	2.26016	-41.8301
--					879.513	-0.02712	-0.18981	-0.0414	-0.05184	879.513	11.6201	21.4638	2.32975	-41.8731
--					880.013	-0.02632	-0.1888	-0.03965	-0.05038	880.013	11.6249	21.4601	2.40496	-41.9163
--					880.513	-0.02582	-0.18774	-0.03778	-0.04903	880.513	11.6287	21.4566	2.48668	-41.9598
--					881.013	-0.02556	-0.18664	-0.03582	-0.04783	881.013	11.6321	21.4531	2.57456	-42.0022
--					881.513	-0.02555	-0.18536	-0.03359	-0.04681	881.513	11.6342	21.4492	2.67666	-42.042
--					882.013	-0.02579	-0.18413	-0.03129	-0.04587	882.013	11.6364	21.4455	2.78603	-42.0842
--					882.513	-0.02619	-0.18285	-0.02892	-0.04503	882.513	11.6379	21.4416	2.9033	-42.1285
--					883.013	-0.02669	-0.18146	-0.02659	-0.04437	883.013	11.6393	21.4375	3.02333	-42.1707
--					883.513	-0.02723	-0.18007	-0.0242	-0.04387	883.513	11.6408	21.4331	3.15233	-42.2117
--					884.013	-0.02777	-0.17848	-0.02182	-0.0435	884.013	11.6426	21.428	3.28695	-42.2541
--					884.513	-0.02833	-0.17698	-0.01955	-0.04327	884.513	11.6455	21.4229	3.42219	-42.2957
--					885.013	-0.0287	-0.17557	-0.01708	-0.04318	885.013	11.6487	21.4178	3.57813	-42.3376
--					885.513	-0.02898	-0.17408	-0.01477	-0.04322	885.513	11.6525	21.4121	3.734	-42.3768
--					886.013	-0.02923	-0.17265	-0.01243	-0.04338	886.013	11.6577	21.4061	3.90333	-42.4175
--					886.513	-0.02948	-0.17115	-0.01026	-0.04362	886.513	11.6638	21.3993	4.07171	-42.4551
--					887.013	-0.02977	-0.16974	-0.00814	-0.04397	887.013	11.6701	21.3923	4.25085	-42.4954
--					887.513	-0.03025	-0.16831	-0.00626	-0.04437	887.513	11.6774	21.3846	4.42225	-42.5333
--					888.013	-0.03094	-0.16694	-0.00441	-0.04483	888.013	11.6848	21.3764	4.60726	-42.5699
--					888.513	-0.03188	-0.1656	-0.00254	-0.04536	888.513	11.6919	21.3677	4.81191	-42.6091
--					889.013	-0.03306	-0.16432	-0.00093408	-0.04588	889.013	11.6984	21.3585	5.00831	-42.645
--					889.513	-0.03464	-0.16309	0.00055154	-0.0465	889.513	11.705	21.3488	5.2097	-42.6857
--					890.013	-0.03621	-0.16186	0.00192	-0.04711	890.013	11.7099	21.3381	5.41636	-42.7258
--					890.513	-0.03789	-0.16065	0.00312	-0.04764	890.513	11.7138	21.3264	5.62085	-42.7617
--					891.013	-0.03965	-0.15956	0.00424	-0.0482	891.013	11.7165	21.3148	5.83422	-42.8006
--					891.513	-0.04102	-0.1585	0.00526	-0.04873	891.513	11.7176	21.3024	6.05493	-42.8409
--					892.013	-0.04195	-0.15753	0.00616	-0.04919	892.013	11.7172	21.2898	6.27724	-42.8806
--					892.513	-0.04242	-0.15661	0.00698	-0.04959	892.513	11.7149	21.2765	6.50581	-42.9204
--					893.013	-0.04205	-0.1557	0.00776	-0.0499	893.013	11.7113	21.2618	6.7545	-42.9588
--					893.513	-0.04118	-0.1549	0.00845	-0.05015	893.513	11.7064	21.2473	7.00954	-42.9996
--					894.013	-0.03956	-0.15419	0.00903	-0.05031	894.013	11.7003	21.2327	7.25014	-43.038
--					894.513	-0.03756	-0.15354	0.00956	-0.05039	894.513	11.6941	21.2175	7.50891	-43.0828
--					895.013	-0.0344	-0.15296	0.01002	-0.05036	895.013	11.6855	21.2021	7.7617	-43.1236
--					895.513	-0.03108	-0.15247	0.01043	-0.05023	895.513	11.6776	21.1863	8.01992	-43.1693
--					896.013	-0.02676	-0.15209	0.01081	-0.05002	896.013	11.6691	21.1722	8.2946	-43.2116
--					896.513	-0.02136	-0.15176	0.01114	-0.0497	896.513	11.6608	21.1566	8.56073	-43.2575
--					897.013	-0.01354	-0.15149	0.01141	-0.04928	897.013	11.652	21.1402	8.81622	-43.3034
--					897.513	-0.00185	-0.15132	0.01167	-0.04879	897.513	11.6428	21.125	9.08814	-43.3498
--					898.013	0.01528	-0.15122	0.0119	-0.04815	898.013	11.634	21.1101	9.36048	-43.4012
--					898.513	0.04637	-0.1512	0.01211	-0.04744	898.513	11.6244	21.095	9.64044	-43.4528
--					899.013	0.1366	-0.15125	0.01229	-0.04668	899.013	11.6147	21.081	9.92079	-43.503
--					899.513	0.33205	-0.15136	0.01246	-0.0459	899.513	11.6013	21.0672	10.2182	-43.5525
--					900.013	0.33205	-0.15152	0.01261	-0.04503	900.013	11.5889	21.0545	10.4989	-43.6048
--					900.513	0.33205	-0.15172	0.01274	-0.04407	900.513	11.5736	21.0425	10.7758	-43.6617
--					901.013	0.33205	-0.15198	0.01287	-0.04313	901.013	11.556	21.0306	11.0702	-43.7163
--					901.513	0.33205	-0.15226	0.01299	-0.04217	901.513	11.5367	21.0199	11.3405	-43.7723
--					902.013	0.33205	-0.15262	0.01311	-0.0412	902.013	11.5166	21.0083	11.618	-43.8299
--					902.513	0.33205	-0.153	0.01324	-0.04021	902.513	11.4933	20.9975	11.9062	-43.89
--					903.013	0.33205	-0.15342	0.01339	-0.03921	903.013	11.4709	20.9875	12.1908	-43.9539
--					903.513	0.33205	-0.15383	0.01354	-0.03832	903.513	11.4465	20.9785	12.4708	-44.0141
--					904.013	0.33205	-0.15429	0.01372	-0.03746	904.013	11.4237	20.9698	12.7489	-44.0769
--					904.513	0.33205	-0.15473	0.01392	-0.03669	904.513	11.4003	20.9623	13.0225	-44.1391
--					905.013	0.33205	-0.15516	0.01414	-0.03601	905.013	11.3789	20.9557	13.2861	-44.1991
--					905.513	0.33205	-0.15556	0.01441	-0.0354	905.513	11.3586	20.95	13.5598	-44.2611
--					906.013	0.33205	-0.15595	0.01472	-0.03486	906.013	11.3416	20.9452	13.8362	-44.3255
--					906.513	0.33205	-0.15634	0.01508	-0.03442	906.513	11.323	20.9406	14.114	-44.39
--					907.013	0.33205	-0.15671	0.01546	-0.03409	907.013	11.3102	20.9368	14.381	-44.4534
--					907.513	0.33205	-0.15703	0.01587	-0.03386	907.513	11.2977	20.9339	14.6357	-44.5161
--					908.013	0.33205	-0.15737	0.01637	-0.03372	908.013	11.2868	20.9311	14.912	-44.5801
										908.513	11.2774	20.9291	15.1509	-44.639
										909.013	11.2704	20.9274	15.4065	-44.7007
										909.513	11.2643	20.9262	15.6486	-44.7591
										910.013	11.2589	20.9253	15.8863	-44.8155
										910.513	11.2548	20.9247	16.1184	-44.8719
										911.013	11.2506	20.9245	16.333	-44.9276
										911.513	11.2464	20.9244	16.5448	-44.9836
										912.013	11.2415	20.9245	16.7438	-45.0329
										912.513	11.2365	20.9247	16.9282	-45.0843
										913.013	11.2313	20.9251	17.1007	-45.133
										913.513	11.2249	20.9255	17.274	-45.1791
										914.013	11.2173	20.926	17.4433	-45.2237
										914.513	11.2095	20.9265	17.6112	-45.2679
										915.013	11.2015	20.9271	17.7514	-45.3109
										915.513	11.1923	20.9277	17.9028	-45.3536
										916.013	11.1818	20.9282	18.0275	-45.392
										916.513	11.172	20.9289	18.1515	-45.4318
										917.013	11.1616	20.9295	18.2651	-45.4688
										917.513	11.1522	20.9303	18.3762	-45.5044
										918.013	11.1424	20.9312	18.4737	-45.5434
										918.513	11.1329	20.9322	18.5642	-45.5823
										919.013	11.1231	20.9332	18.6467	-45.6215
										919.513	11.1146	20.9343	18.7292	-45.6596
										920.013	11.1077	20.9357	18.8008	-45.7001
										920.513	11.1007	20.9373	18.8712	-45.7411
										--	--	--	--	--
										--	--	--	--	--
										--	--	--	--	--
										--	--	--	--	--
										--	--	--	--	--
										--	--	--	--	--
										--	--	--	--	--
										--	--	--	--	--
										--	--	--	--	--
										--	--	--	--	--
										--	--	--	--	--
										--	--	--	--	--
										--	--	--	--	--
										--	--	--	--	--
										--	--	--	--	--
										--	--	--	--	--
										--	--	--	--	--
										--	--	--	--	--
										--	--	--	--	--
										--	--	--	--	--
										--	--	--	--	--
										--	--	--	--	--
										--	--	--	--	--
										--	--	--	--	--
										--	--	--	--	--
										--	--	--	--	--
										--	--	--	--	--
										--	--	--	--	--
										--	--	--	--	--
										--	--	--	--	--
										--	--	--	--	--
										--	--	--	--	--
										--	--	--	--	--
										--	--	--	--	--
										--	--	--	--	--
										--	--	--	--	--
										--	--	--	--	--
										--	--	--	--	--
										--	--	--	--	--
										--	--	--	--	--
										--	--	--	--	--
										--	--	--	--	--
										--	--	--	--	--
										--	--	--	--	--
										--	--	--	--	--
										--	--	--	--	--
										--	--	--	--	--
										--	--	--	--	--
										--	--	--	--	--
										--	--	--	--	--
										--	--	--	--	--
										--	--	--	--	--
										--	--	--	--	--
										--	--	--	--	--
										--	--	--	--	--
										--	--	--	--	--
										--	--	--	--	--
										--	--	--	--	--
										--	--	--	--	--
										--	--	--	--	--
										--	--	--	--	--
										--	--	--	--	--
										--	--	--	--	--
										--	--	--	--	--
										--	--	--	--	--
										--	--	--	--	--
										--	--	--	--	--
										--	--	--	--	--
										--	--	--	--	--
										--	--	--	--	--
										--	--	--	--	--
										--	--	--	--	--
										--	--	--	--	--
										--	--	--	--	--
										--	--	--	--	--
										--	--	--	--	--
										--	--	--	--	--
										--	--	--	--	--
										--	--	--	--	--
										--	--	--	--	--
										--	--	--	--	--
										--	--	--	--	--
										--	--	--	--	--
										--	--	--	--	--
										--	--	--	--	--
										--	--	--	--	--
										--	--	--	--	--
										--	--	--	--	--
										--	--	--	--	--
										--	--	--	--	--
										--	--	--	--	--
										--	--	--	--	--
										--	--	--	--	--
										--	--	--	--	--
										--	--	--	--	--
										--	--	--	--	--
										--	--	--	--	--
										--	--	--	--	--
										--	--	--	--	--
										--	--	--	--	--
										--	--	--	--	--
										--	--	--	--	--
										--	--	--	--	--
										--	--	--	--	--
										--	--	--	--	--
										--	--	--	--	--
										--	--	--	--	--
										--	--	--	--	--
										--	--	--	--	--
										--	--	--	--	--
										--	--	--	--	--
										--	--	--	--	--
										--	--	--	--	--
										--	--	--	--	--
										--	--	--	--	--
										--	--	--	--	--
										--	--	--	--	--
										--	--	--	--	--
										--	--	--	--	--
										--	--	--	--	--
										--	--	--	--	--
										--	--	--	--	--
										--	--	--	--	--
										--	--	--	--	--
										--	--	--	--	--
										--	--	--	--	--
										--	--	--	--	--
										--	--	--	--	--
										--	--	--	--	--
										--	--	--	--	--
										--	--	--	--	--
										--	--	--	--	--
										--	--	--	--	--
										--	--	--	--	--
										--	--	--	--	--
										--	--	--	--	--
										--	--	--	--	--
										--	--	--	--	--
										--	--	--	--	--
										--	--	--	--	--
										--	--	--	--	--
										--	--	--	--	--
										--	--	--	--	--
										--	--	--	--	--
										--	--	--	--	--
										--	--	--	--	--
										--	--	--	--	--
										--	--	--	--	--
										--	--	--	--	--
										--	--	--	--	--
										--	--	--	--	--
										--	--	--	--	--
										--	--	--	--	--
										--	--	--	--	--
										--	--	--	--	--
										--	--	--	--	--
										--	--	--	--	--
										--	--	--	--	--

## Sheet: ZJM
ZJM
Temperature	TG	TG	TG	TG	DTG	DTG	DTG	DTG	Temperature	DSC	DSC	DSC	DSC
°C	%	%	%	%	%/min	%/min	%/min	%/min	°C	mW	mW	mW	mW
	5°C/min	10°C/min	15°C/min	20°C/min	5°C/min	10°C/min	15°C/min	20°C/min		5°C/min	10°C/min	15°C/min	20°C/min
26.8	100.085	100	100.644	99.7759	-0.30458	0.17873	-1.27552	-0.86922	24.114	-1.43164	-0.17196	-1.70133	0.19681
27	100.074	100	100.645	99.7674	-0.28781	0.17873	-1.69155	-0.85214	24.614	-2.19282	-0.17196	-1.70133	-0.90474
27.2	100.064	100	100.633	99.759	-0.2727	0.17873	-2.14872	-0.83839	25.114	-2.6459	-0.17196	-1.70133	-1.60209
27.4	100.055	100	100.618	99.7507	-0.2591	0.17873	-2.6224	-0.82746	25.614	-2.84031	-0.17196	-1.70133	-2.22727
27.6	100.046	100	100.637	99.7425	-0.24748	0.17873	-3.08022	-0.81888	26.114	-3.34918	-0.17196	-1.70133	-2.82638
27.8	100.037	100	100.701	99.7344	-0.23819	0.17873	-3.49078	-0.8122	26.614	-3.63238	-0.17196	-1.70133	-3.30238
28	100.028	100	100.711	99.7263	-0.23083	0.17873	-3.8296	-0.80699	27.114	-3.91852	-0.17196	-1.70133	-3.77934
28.2	100.019	100	100.535	99.7183	-0.22477	0.17873	-4.07463	-0.80293	27.614	-4.16632	-0.17196	-1.70133	-4.18793
28.4	100.01	100.033	100.202	99.7103	-0.21962	0.32417	-4.21343	-0.79978	28.114	-4.42184	-0.17196	-1.70133	-4.6325
28.6	100.002	99.9568	99.9288	99.7024	-0.21526	-0.1211	-4.24506	-0.7973	28.614	-4.66098	-0.39587	-3.21847	-5.06406
28.8	99.994	99.9298	99.891	99.6944	-0.21159	-0.13521	-4.17218	-0.79524	29.114	-4.87707	-0.77862	-2.96725	-5.46937
29	99.9862	99.9142	99.9917	99.6865	-0.20849	-0.14225	-4.01164	-0.79339	29.614	-5.09583	-1.13053	-3.39464	-5.85649
29.2	99.9783	99.8993	100.054	99.6785	-0.20584	-0.14897	-3.78474	-0.79165	30.114	-5.31146	-1.44176	-3.73094	-6.21656
29.4	99.9702	99.8864	100.013	99.6706	-0.20352	-0.15456	-3.51576	-0.78996	30.614	-5.51102	-1.70701	-4.07249	-6.54717
29.6	99.962	99.8776	99.9363	99.6628	-0.20146	-0.15837	-3.23251	-0.78829	31.114	-5.68724	-1.95532	-4.39517	-6.91662
29.8	99.9538	99.8651	99.8876	99.6549	-0.19958	-0.16392	-2.96085	-0.78667	31.614	-5.86442	-2.20448	-4.68892	-7.25168
30	99.9455	99.8559	99.8637	99.647	-0.19786	-0.16818	-2.71608	-0.78512	32.114	-6.0411	-2.43588	-4.98106	-7.56282
30.2	99.9374	99.847	99.8416	99.6392	-0.19634	-0.17251	-2.50993	-0.7837	32.614	-6.21854	-2.64066	-5.24065	-7.8883
30.4	99.9295	99.8406	99.8113	99.6313	-0.19502	-0.17573	-2.34422	-0.78241	33.114	-6.38191	-2.83388	-5.50638	-8.21384
30.6	99.9218	99.8305	99.7787	99.6235	-0.19394	-0.18104	-2.20883	-0.78129	33.614	-6.5492	-3.05557	-5.73928	-8.52176
30.8	99.9146	99.8245	99.7491	99.6157	-0.19313	-0.18435	-2.09407	-0.78033	34.114	-6.72075	-3.23078	-5.99411	-8.82276
31	99.9075	99.8126	99.7228	99.6079	-0.19262	-0.1912	-1.99565	-0.77952	34.614	-6.86297	-3.41406	-6.23364	-9.11387
31.2	99.9003	99.8107	99.6984	99.6002	-0.19244	-0.19237	-1.91099	-0.77884	35.114	-7.01941	-3.60799	-6.45582	-9.399
31.4	99.8929	99.8012	99.6747	99.5924	-0.19259	-0.19818	-1.83759	-0.77831	35.614	-7.15171	-3.79792	-6.70469	-9.68102
31.6	99.8854	99.7931	99.6514	99.5846	-0.19306	-0.20338	-1.77308	-0.7779	36.114	-7.28766	-3.977	-6.9206	-9.94419
31.8	99.8778	99.7873	99.6281	99.5768	-0.19384	-0.20716	-1.71508	-0.77761	36.614	-7.42821	-4.15278	-7.13722	-10.2036
32	99.8701	99.7798	99.6055	99.5691	-0.19489	-0.2122	-1.66106	-0.77742	37.114	-7.5538	-4.30757	-7.34971	-10.4841
32.2	99.8621	99.7718	99.5845	99.5613	-0.19616	-0.21775	-1.60856	-0.77732	37.614	-7.68105	-4.47852	-7.56633	-10.7381
32.4	99.854	99.7661	99.5652	99.5535	-0.19759	-0.22179	-1.55716	-0.77731	38.114	-7.79219	-4.64351	-7.77258	-10.9934
32.6	99.846	99.7592	99.5461	99.5457	-0.19911	-0.22677	-1.5089	-0.77738	38.614	-7.91412	-4.79356	-7.98342	-11.243
32.8	99.8382	99.7528	99.5264	99.538	-0.20065	-0.23145	-1.46555	-0.77751	39.114	-8.03062	-4.97494	-8.18211	-11.5187
33	99.8305	99.7475	99.5069	99.5302	-0.20217	-0.23534	-1.42685	-0.77773	39.614	-8.15117	-5.13026	-8.3728	-11.7425
33.2	99.8227	99.7412	99.4888	99.5224	-0.20362	-0.24008	-1.3919	-0.77802	40.114	-8.25007	-5.28647	-8.56311	-12.0028
33.4	99.8145	99.7327	99.4724	99.5146	-0.20499	-0.24651	-1.36015	-0.77841	40.614	-8.36163	-5.41408	-8.76521	-12.2474
33.6	99.8059	99.7257	99.4561	99.5069	-0.20624	-0.2519	-1.33145	-0.77888	41.114	-8.45784	-5.58165	-8.94649	-12.4775
33.8	99.7969	99.7186	99.4386	99.4991	-0.20738	-0.25745	-1.30561	-0.77938	41.614	-8.55716	-5.73517	-9.13121	-12.7018
34	99.7878	99.7125	99.4206	99.4913	-0.2084	-0.26218	-1.28224	-0.7798	42.114	-8.6437	-5.85468	-9.31989	-12.9563
34.2	99.7796	99.7069	99.4029	99.4835	-0.20933	-0.26661	-1.26087	-0.78006	42.614	-8.73615	-6.00548	-9.50353	-13.1876
34.4	99.7719	99.7003	99.3862	99.4757	-0.21022	-0.27179	-1.24112	-0.78013	43.114	-8.82074	-6.14499	-9.68239	-13.4221
34.6	99.7641	99.6927	99.3704	99.4679	-0.21109	-0.27775	-1.22266	-0.78009	43.614	-8.90448	-6.26782	-9.86052	-13.6444
34.8	99.7553	99.6856	99.3555	99.4601	-0.212	-0.28337	-1.20521	-0.78001	44.114	-8.9888	-6.41922	-10.0432	-13.8547
35	99.7462	99.6792	99.3407	99.4523	-0.21298	-0.28849	-1.18858	-0.77997	44.614	-9.06263	-6.54857	-10.2197	-14.097
35.2	99.7374	99.6721	99.3247	99.4445	-0.21407	-0.29411	-1.17263	-0.77996	45.114	-9.13676	-6.67894	-10.366	-14.3087
35.4	99.7295	99.6645	99.3078	99.4367	-0.21529	-0.30018	-1.1573	-0.77997	45.614	-9.21374	-6.81001	-10.56	-14.5374
[truncated: 4,362 more rows]

## Sheet: WJG
WJG
[truncated: 4,403 more rows]
